# Supplementary material for: Salt Stress Induces Non-CG Methylation in Coding Regions of Barley Seedlings (<em>Hordeum vulgare</em>)
Source: Preprints.org preprint supplement (doi:10.20944/preprints201804.0323.v2), 2018-06-15
Supplement: Supplementary file 1 [file Supplemental Data Set_S5_Sample_info.xlsx]

## Sheet: Info
Supplemental Data Set S5. Sample information
Title: Methylation-sensitive GBS reveals non-CG methylation in gene-body induced by salt stress in barley seedlings (Hordeum vulgare)
Moumouni Konate1, Mike J. Wilkinson2, Benjamin T. Mayne3, Stephen M. Pederson4, Eileen S. Scott5, Bettina Berger5, 6, Carlos Marcelino Rodriguez Lopez5,7*
1,5Institut de l'Environnement et de Recherches Agricoles (INERA), Station de Farako-Ba, 01 BP 910 Bobo-Dioulasso 01, Burkina Faso; email: mouni.konate@gmail.com.
2Pwllpeiran Upland Research Centre, Institute of Biological, Environmental and Rural Sciences, Penglais Campus, Aberystwyth, Ceredigion, SY23 3FG, UK.
3Robinson Research Institute, School of Medicine, The University of Adelaide, SA 5005 Australia
4Bioinformatics Hub, School of Biological sciences, The University of Adelaide, SA 5005 Australia
5School of Agriculture, Food and Wine, The University of Adelaide, Waite Campus, PMB 1, Glen Osmond, SA 5064, Australia
6The Plant Accelerator, Australian Plant Phenomics Facility, Waite Campus, The University of Adelaide, SA 5064, Australia
7Environmental Epigenetics and Genetics Group; Department of Horticulture, College of Agriculture, Food and Environment, University of Kentucky, Lexington, KY 40546, USA
*Corresponding authors: mjw19@aber.ac.uk (M.J.M.); carlos.rodriguezlopez@uky.edu (C.M.R.L.);
Tel.: +44-(0)-1970-823204 (M.J.M.); +1-859-257-5020 ext. 80749 (C.M.R.L.)

## Sheet: Supplemental Data Set_S5_Sample
Sample.ID	Variety	Tissue	NaCl (mM)	Barcode	Plate
R1_Lb3Hind	Hindmarsh	Leaf blade#3	0	AATGT	LM1
R1_Lb3Skoo	Schooner	Leaf blade#3	0	CCTGA	LM1
R1_Lb3Yara	Yarra	Leaf blade#3	0	TGTCT	LM1
R1_Lb3Barq	Barque 73	Leaf blade#3	0	GACATT	LM1
R1_Lb3Flag	Flagship	Leaf blade#3	0	CACTGT	LM1
R2_Lb3Skoo	Schooner	Leaf blade#3	0	GTGCTA	LM1
R2_Lb3Flag	Flagship	Leaf blade#3	0	CACCGTA	LM1
R2_Lb3Hind	Hindmarsh	Leaf blade#3	0	ACGTTGT	LM1
R2_Lb3Yara	Yarra	Leaf blade#3	0	ACCATGA	LM1
R2_Lb3Barq	Barque 73	Leaf blade#3	0	TCGTGTTA	LM1
R3_Lb3Yara	Yarra	Leaf blade#3	0	ACACGATT	LM1
R3_Lb3Hind	Hindmarsh	Leaf blade#3	0	TCTGTTAA	LM1
R3_Lb3Barq	Barque 73	Leaf blade#3	0	AACAAGATA	LM1
R3_Lb3Skoo	Schooner	Leaf blade#3	0	CTTGTTAAT	LM1
R3_Lb3Flag	Flagship	Leaf blade#3	0	CCGAG	LM2
R4_Lb3Barq	Barque 73	Leaf blade#3	0	GGACG	LM2
0_R4_Lb3Yara	Yarra	Leaf blade#3	0	GAGAT	LM2
0_R4_Lb3Skoo	Schooner	Leaf blade#3	0	TTGCAT	LM2
0_R4_Lb3Flag	Flagship	Leaf blade#3	0	GATCAT	LM2
0_R4_Lb3Hind	Hindmarsh	Leaf blade#3	0	TTGTCAA	LM2
0_R5_Lb3Barq	Barque 73	Leaf blade#3	0	GGACAGT	LM2
0_R5_Lb3Flag	Flagship	Leaf blade#3	0	CTGTTAT	LM2
0_R5_Lb3Hind	Hindmarsh	Leaf blade#3	0	GAGACTAA	LM2
0_R5_Lb3Skoo	Schooner	Leaf blade#3	0	CTTGTGTA	LM2
0_R5_Lb3Yara	Yarra	Leaf blade#3	0	AACATGTT	LM2
75_R1_Lb3Hind	Hindmarsh	Leaf blade#3	75	TTCAT	LM3
75_R1_Lb3Skoo	Schooner	Leaf blade#3	75	GGACG	LM3
75_R1_Lb3Yara	Yarra	Leaf blade#3	75	ACATA	LM3
75_R1_Lb3Barq	Barque 73	Leaf blade#3	75	CACGG	LM3
75_R1_Lb3Flag	Flagship	Leaf blade#3	75	TGTCT	LM3
75_R2_Lb3Skoo	Schooner	Leaf blade#3	75	ATGAA	LM3
75_R2_Lb3Flag	Flagship	Leaf blade#3	75	GAGAT	LM3
75_R2_Lb3Hind	Hindmarsh	Leaf blade#3	75	CCACGT	LM3
75_R2_Lb3Yara	Yarra	Leaf blade#3	75	TTCTGA	LM3
75_R2_Lb3Barq	Barque 73	Leaf blade#3	75	CGTGAA	LM3
75_R3_Lb3Yara	Yarra	Leaf blade#3	75	GACATT	LM3
75_R3_Lb3Hind	Hindmarsh	Leaf blade#3	75	ACATGA	LM3
75_R3_Lb3Barq	Barque 73	Leaf blade#3	75	TTGCAT	LM3
75_R3_Lb3Skoo	Schooner	Leaf blade#3	75	GCTGTA	LM3
75_R3_Lb3Flag	Flagship	Leaf blade#3	75	AGACAT	LM3
75_R4_Lb3Barq	Barque 73	Leaf blade#3	75	CACTGT	LM3
75_R4_Lb3Yara	Yarra	Leaf blade#3	75	TTGGCA	LM3
75_R4_Lb3Skoo	Schooner	Leaf blade#3	75	AGCATA	LM3
75_R4_Lb3Flag	Flagship	Leaf blade#3	75	GATCAT	LM3
75_R4_Lb3Hind	Hindmarsh	Leaf blade#3	75	CCTAGA	LM3
75_R5_Lb3Barq	Barque 73	Leaf blade#3	75	TGATCT	LM3
75_R5_Lb3Flag	Flagship	Leaf blade#3	75	GTGCTA	LM3
75_R5_Lb3Hind	Hindmarsh	Leaf blade#3	75	AACGAT	LM3
75_R5_Lb3Skoo	Schooner	Leaf blade#3	75	CCAATG	LM3
75_R5_Lb3Yara	Yarra	Leaf blade#3	75	TTGTCAA	LM3
150_R1_Lb3Hind	Hindmarsh	Leaf blade#3	150	ACTGGTT	LM3
150_R1_Lb3Skoo	Schooner	Leaf blade#3	150	GGAACAT	LM3
150_R1_Lb3Yara	Yarra	Leaf blade#3	150	CACCGTA	LM3
150_R1_Lb3Flag	Flagship	Leaf blade#3	150	CTTGTGA	LM3
150_R1_Lb3Barq	Barque 73	Leaf blade#3	150	TCGTAAT	LM3
150_R2_Lb3Flag	Flagship	Leaf blade#3	150	GGACAGT	LM3
150_R2_Lb3Barq	Barque 73	Leaf blade#3	150	AACGCTA	LM3
150_R2_Lb3Skoo	Schooner	Leaf blade#3	150	CTTAGAA	LM3
150_R2_Lb3Hind	Hindmarsh	Leaf blade#3	150	ACGTTGT	LM3
150_R2_Lb3Yara	Yarra	Leaf blade#3	150	TGACCTA	LM3
150_R3_Lb3Flag	Flagship	Leaf blade#3	150	GACAATT	LM3
150_R3_Lb3Yara	Yarra	Leaf blade#3	150	CTGTTAT	LM3
150_R3_Lb3Hind	Hindmarsh	Leaf blade#3	150	TGTCGGA	LM3
150_R3_Lb3Barq	Barque 73	Leaf blade#3	150	GAAGCTT	LM3
150_R3_Lb3Skoo	Schooner	Leaf blade#3	150	ACCATGA	LM3
150_R4_Lb3Skoo	Schooner	Leaf blade#3	150	CGTTAAT	LM3
150_R4_Lb3Flag	Flagship	Leaf blade#3	150	TTCGGAAT	LM3
150_R4_Lb3Hind	Hindmarsh	Leaf blade#3	150	GAGACTAA	LM3
150_R4_Lb3Yara	Yarra	Leaf blade#3	150	ACACAGTA	LM3
150_R4_Lb3Barq	Barque 73	Leaf blade#3	150	CTTGTAAT	LM3
150_R5_Lb3Yara	Yarra	Leaf blade#3	150	TCGTGTTA	LM3
150_R5_Lb3Skoo	Schooner	Leaf blade#3	150	GGAACGTT	LM3
150_R5_Lb3Hind	Hindmarsh	Leaf blade#3	150	AACCGAAT	LM3
150_R5_Lb3Flag	Flagship	Leaf blade#3	150	CTTGTGTA	LM3
150_R5_Lb3Barq	Barque 73	Leaf blade#3	150	TGCTATAA	LM3
200_R1_Lb3Hind	Hindmarsh	Leaf blade#3	200	GAGAACAT	LM3
200_R1_Lb3Barq	Barque 73	Leaf blade#3	200	ACACGATT	LM3
200_R1_Lb3Yara	Yarra	Leaf blade#3	200	TTGTCGAA	LM3
200_R1_Lb3Skoo	Schooner	Leaf blade#3	200	GGTGCTTA	LM3
200_R1_Lb3Flag	Flagship	Leaf blade#3	200	AACATGTT	LM3
200_R2_Lb3Skoo	Schooner	Leaf blade#3	200	CCACGCAT	LM3
200_R2_Lb3Hind	Hindmarsh	Leaf blade#3	200	CTGTAATA	LM3
200_R2_Lb3Yara	Yarra	Leaf blade#3	200	TCTGTTAA	LM3
200_R2_Lb3Flag	Flagship	Leaf blade#3	200	GGAACAATA	LM3
200_R2_Lb3Barq	Barque 73	Leaf blade#3	200	AACCTGCAT	LM3
200_R3_Lb3Flag	Flagship	Leaf blade#3	200	TTGTACTTA	LM3
200_R3_Lb3Yara	Yarra	Leaf blade#3	200	GGTGGTCAT	LM3
200_R3_Lb3Skoo	Schooner	Leaf blade#3	200	AACAAGATA	LM3
200_R3_Lb3Barq	Barque 73	Leaf blade#3	200	CCACGATAT	LM3
200_R3_Lb3Hind	Hindmarsh	Leaf blade#3	200	TTGTCCATT	LM3
200_R4_Lb3Hind	Hindmarsh	Leaf blade#3	200	GGTGTTCTA	LM3
200_R4_Lb3Skoo	Schooner	Leaf blade#3	200	AACACGTAA	LM3
200_R4_Lb3Barq	Barque 73	Leaf blade#3	200	CCACGCCTT	LM3
200_R4_Lb3Flag	Flagship	Leaf blade#3	200	CTTGTTAAT	LM3
200_R4_Lb3Yara	Yarra	Leaf blade#3	200	GCGTAATAA	LM3
200_R5_Lb3Hind	Hindmarsh	Leaf blade#3	200	AACCA	LM4
200_R5_Lb3Flag	Flagship	Leaf blade#3	200	CCACT	LM4
200_R5_Lb3Yara	Yarra	Leaf blade#3	200	TATAG	LM4
200_R5_Lb3Skoo	Schooner	Leaf blade#3	200	GCGCA	LM4
200_R5_Lb3Barq	Barque 73	Leaf blade#3	200	AATGT	LM4
0_R1_RtHind	Hindmarsh	Root	0	CCACGCAT	LM2
0_R1_RtSkoo	Schooner	Root	0	CTGTAATA	LM2
0_R1_RtYara	Yarra	Root	0	TCTGTTAA	LM2
0_R1_RtBarq	Barque 73	Root	0	GGAACAATA	LM2
0_R1_RtFlag	Flagship	Root	0	AACCTGCAT	LM2
0_R2_RtSkoo	Schooner	Root	0	TTGTACTTA	LM2
0_R2_RtFlag	Flagship	Root	0	GGTGGTCAT	LM2
0_R2_RtHind	Hindmarsh	Root	0	AACAAGATA	LM2
0_R2_RtYara	Yarra	Root	0	CCACGATAT	LM2
0_R2_RtBarq	Barque 73	Root	0	TTGTCCATT	LM2
0_R3_RtYara	Yarra	Root	0	GGTGTTCTA	LM2
0_R3_RtHind	Hindmarsh	Root	0	AACACGTAA	LM2
0_R3_RtBarq	Barque 73	Root	0	CCACGCCTT	LM2
0_R3_RtSkoo	Schooner	Root	0	CTTGTTAAT	LM2
0_R3_RtFlag	Flagship	Root	0	GCGTAATAA	LM2
0_R4_RtBarq	Barque 73	Root	0	AACCA	LM3
0_R4_RtYara	Yarra	Root	0	CCACT	LM3
0_R4_RtSkoo	Schooner	Root	0	TATAG	LM3
0_R4_RtFlag	Flagship	Root	0	GCGCA	LM3
0_R4_RtHind	Hindmarsh	Root	0	AATGT	LM3
0_R5_RtBarq	Barque 73	Root	0	CCGAG	LM3
0_R5_RtFlag	Flagship	Root	0	TTACA	LM3
0_R5_RtHind	Hindmarsh	Root	0	GGCTT	LM3
0_R5_RtSkoo	Schooner	Root	0	AAGTG	LM3
0_R5_RtYara	Yarra	Root	0	CCTGA	LM3
75_R1_RtHind	Hindmarsh	Root	75	CCGAG	LM4
75_R1_RtSkoo	Schooner	Root	75	TTACA	LM4
75_R1_RtYara	Yarra	Root	75	GGCTT	LM4
75_R1_RtBarq	Barque 73	Root	75	AAGTG	LM4
75_R1_RtFlag	Flagship	Root	75	CCTGA	LM4
75_R2_RtSkoo	Schooner	Root	75	TTCAT	LM4
75_R2_RtFlag	Flagship	Root	75	GGACG	LM4
75_R2_RtHind	Hindmarsh	Root	75	ACATA	LM4
75_R2_RtYara	Yarra	Root	75	CACGG	LM4
75_R2_RtBarq	Barque 73	Root	75	TGTCT	LM4
75_R3_RtYara	Yarra	Root	75	ATGAA	LM4
75_R3_RtHind	Hindmarsh	Root	75	GAGAT	LM4
75_R3_RtBarq	Barque 73	Root	75	CCACGT	LM4
75_R3_RtSkoo	Schooner	Root	75	TTCTGA	LM4
75_R3_RtFlag	Flagship	Root	75	CGTGAA	LM4
75_R4_RtBarq	Barque 73	Root	75	GACATT	LM4
75_R4_RtYara	Yarra	Root	75	ACATGA	LM4
75_R4_RtSkoo	Schooner	Root	75	TTGCAT	LM4
75_R4_RtFlag	Flagship	Root	75	GCTGTA	LM4
75_R4_RtHind	Hindmarsh	Root	75	AGACAT	LM4
75_R5_RtBarq	Barque 73	Root	75	CACTGT	LM4
75_R5_RtFlag	Flagship	Root	75	TTGGCA	LM4
75_R5_RtHind	Hindmarsh	Root	75	AGCATA	LM4
75_R5_RtSkoo	Schooner	Root	75	GATCAT	LM4
75_R5_RtYara	Yarra	Root	75	CCTAGA	LM4
150_R1_RtHind	Hindmarsh	Root	150	TGATCT	LM4
150_R1_RtSkoo	Schooner	Root	150	GTGCTA	LM4
150_R1_RtYara	Yarra	Root	150	AACGAT	LM4
150_R1_RtFlag	Flagship	Root	150	CCAATG	LM4
150_R1_RtBarq	Barque 73	Root	150	TTGTCAA	LM4
150_R2_RtFlag	Flagship	Root	150	ACTGGTT	LM4
150_R2_RtBarq	Barque 73	Root	150	GGAACAT	LM4
150_R2_RtSkoo	Schooner	Root	150	CACCGTA	LM4
150_R2_RtHind	Hindmarsh	Root	150	CTTGTGA	LM4
150_R2_RtYara	Yarra	Root	150	TCGTAAT	LM4
150_R3_RtFlag	Flagship	Root	150	GGACAGT	LM4
150_R3_RtYara	Yarra	Root	150	AACGCTA	LM4
150_R3_RtHind	Hindmarsh	Root	150	CTTAGAA	LM4
150_R3_RtBarq	Barque 73	Root	150	ACGTTGT	LM4
150_R3_RtSkoo	Schooner	Root	150	TGACCTA	LM4
150_R4_RtSkoo	Schooner	Root	150	GACAATT	LM4
150_R4_RtFlag	Flagship	Root	150	CTGTTAT	LM4
150_R4_RtHind	Hindmarsh	Root	150	TGTCGGA	LM4
150_R4_RtYara	Yarra	Root	150	GAAGCTT	LM4
150_R4_RtBarq	Barque 73	Root	150	ACCATGA	LM4
150_R5_RtYara	Yarra	Root	150	CGTTAAT	LM4
150_R5_RtSkoo	Schooner	Root	150	TTCGGAAT	LM4
150_R5_RtHind	Hindmarsh	Root	150	GAGACTAA	LM4
150_R5_RtFlag	Flagship	Root	150	ACACAGTA	LM4
150_R5_RtBarq	Barque 73	Root	150	CTTGTAAT	LM4
200_R1_RtHind	Hindmarsh	Root	200	TCGTGTTA	LM4
200_R1_RtBarq	Barque 73	Root	200	GGAACGTT	LM4
200_R1_RtYara	Yarra	Root	200	AACCGAAT	LM4
200_R1_RtSkoo	Schooner	Root	200	CTTGTGTA	LM4
200_R1_RtFlag	Flagship	Root	200	TGCTATAA	LM4
200_R2_RtSkoo	Schooner	Root	200	GAGAACAT	LM4
200_R2_RtHind	Hindmarsh	Root	200	ACACGATT	LM4
200_R2_RtYara	Yarra	Root	200	TTGTCGAA	LM4
200_R2_RtFlag	Flagship	Root	200	GGTGCTTA	LM4
200_R2_RtBarq	Barque 73	Root	200	AACATGTT	LM4
200_R3_RtFlag	Flagship	Root	200	CCACGCAT	LM4
200_R3_RtYara	Yarra	Root	200	CTGTAATA	LM4
200_R3_RtSkoo	Schooner	Root	200	TCTGTTAA	LM4
200_R3_RtBarq	Barque 73	Root	200	GGAACAATA	LM4
200_R3_RtHind	Hindmarsh	Root	200	AACCTGCAT	LM4
200_R4_RtHind	Hindmarsh	Root	200	TTGTACTTA	LM4
200_R4_RtSkoo	Schooner	Root	200	GGTGGTCAT	LM4
200_R4_RtBarq	Barque 73	Root	200	AACAAGATA	LM4
200_R4_RtFlag	Flagship	Root	200	CCACGATAT	LM4
200_R4_RtYara	Yarra	Root	200	TTGTCCATT	LM4
200_R5_RtHind	Hindmarsh	Root	200	GGTGTTCTA	LM4
200_R5_RtFlag	Flagship	Root	200	AACACGTAA	LM4
200_R5_RtYara	Yarra	Root	200	CCACGCCTT	LM4
200_R5_RtSkoo	Schooner	Root	200	CTTGTTAAT	LM4
200_R5_RtBarq	Barque 73	Root	200	GCGTAATAA	LM4
