# Supplementary material for: Salt Stress Induces Non-CG Methylation in Coding Regions of Barley Seedlings (<em>Hordeum vulgare</em>)
Source: Preprints.org preprint supplement (doi:10.20944/preprints201804.0323.v2), 2018-06-15
Supplement: Supplementary file 2 [file Supplemental_Dataset_S1_stable_DMMs.xlsx]

## Sheet: Info
Supplemental Data Set S1. List of stable salt-induced differentially methylated markers in leaves and roots.
Title: Methylation-sensitive GBS reveals non-CG methylation in gene-body induced by salt stress in barley seedlings (Hordeum vulgare)
Moumouni Konate1, Mike J. Wilkinson2, Benjamin T. Mayne3, Stephen M. Pederson4, Eileen S. Scott5, Bettina Berger5, 6, Carlos Marcelino Rodriguez Lopez5,7*
1,5Institut de l'Environnement et de Recherches Agricoles (INERA), Station de Farako-Ba, 01 BP 910 Bobo-Dioulasso 01, Burkina Faso; email: mouni.konate@gmail.com.
2Pwllpeiran Upland Research Centre, Institute of Biological, Environmental and Rural Sciences, Penglais Campus, Aberystwyth, Ceredigion, SY23 3FG, UK.
3Robinson Research Institute, School of Medicine, The University of Adelaide, SA 5005 Australia
4Bioinformatics Hub, School of Biological sciences, The University of Adelaide, SA 5005 Australia
5School of Agriculture, Food and Wine, The University of Adelaide, Waite Campus, PMB 1, Glen Osmond, SA 5064, Australia
6The Plant Accelerator, Australian Plant Phenomics Facility, Waite Campus, The University of Adelaide, SA 5064, Australia
7Environmental Epigenetics and Genetics Group; Department of Horticulture, College of Agriculture, Food and Environment, University of Kentucky, Lexington, KY 40546, USA
*Corresponding authors: mjw19@aber.ac.uk (M.J.M.); carlos.rodriguezlopez@uky.edu (C.M.R.L.);
Tel.: +44-(0)-1970-823204 (M.J.M.); +1-859-257-5020 ext. 80749 (C.M.R.L.)

## Sheet: stable_DMMsLeaves
List of stable salt-induced differentially methylated markers in leaves.
Differentially methylated markers (DMMs)					75 mM NaCl					150 mM NaCl					200 mM NaCl
DMM location	Methylation	Chromosome	Position	Strand	logFC	logCPM	LR	PValue	FDR	logFC	logCPM	LR	PValue	FDR	logFC	logCPM	LR	PValue	FDR
1:1:273680	Hypo	1H	273680	1	1.20945	3.11107	16.1907	5.73e-05	0.00133243	1.68256	3.37531	35.86	2.12e-09	2.32e-07	1.53155	3.41644	17.8615	2.38e-05	0.000405612
1:1:919060	Hypo	1H	919060	1	1.01729	4.49899	21.1171	4.32e-06	0.000192884	1.31573	4.6991	35.4399	2.63e-09	2.76e-07	1.19906	4.72498	22.6511	1.94e-06	5.82e-05
1:1:993217	Hypo	1H	993217	1	0.896137	5.23492	19.0002	1.31e-05	0.000443772	1.11523	5.39354	29.2031	6.52e-08	3.93e-06	1.37625	5.64847	24.5248	7.34e-07	2.72e-05
1:1:1204142	Hypo	1H	1204142	1	0.949453	3.722	15.2057	9.64e-05	0.0019649	1.245	3.91062	24.8953	6.05e-07	2.44e-05	1.41524	4.09674	22.2416	2.4e-06	6.8e-05
1:1:1926669	Hypo	1H	1926669	1	0.853306	5.26552	26.1678	3.13e-07	2.58e-05	0.955154	5.34781	27.676	1.43e-07	7.53e-06	1.16622	5.56995	31.713	1.79e-08	1.51e-06
1:1:1970876	Hypo	1H	1970876	1	1.40298	2.39679	11.3556	0.000752198	0.0087145	1.48674	2.49012	12.4251	0.000423595	0.00437266	2.1098	2.84539	18.4112	1.78e-05	0.000323013
1:1:2216141	Hypo	1H	2216141	1	1.46105	2.8922	19.7103	9.01e-06	0.000337297	1.54145	2.96982	22.3271	2.3e-06	7.24e-05	1.55151	3.07962	11.8398	0.000579794	0.00459107
1:1:2231129	Hyper	1H	2231129	1	-0.782624	4.24758	17.0346	3.67e-05	0.000955212	-0.797812	4.26545	13.543	0.00023316	0.0027744	-0.869468	4.51584	12.4592	0.000415947	0.00356515
1:1:2898976	Hypo	1H	2898976	1	1.54131	3.05064	20.8802	4.89e-06	0.00021245	1.54321	3.08474	25.9161	3.57e-07	1.57e-05	1.66227	3.25327	18.031	2.17e-05	0.00037798
1:1:2991962	Hypo	1H	2991962	1	0.970687	4.08407	18.0959	2.1e-05	0.000632817	1.40175	4.34884	46.7327	8.14e-12	2.54e-09	1.31771	4.41014	25.6888	4.01e-07	1.7e-05
1:1:3179022	Hypo	1H	3179022	1	1.40729	4.06376	32.0169	1.53e-08	2.46e-06	1.748	4.29382	47.2804	6.15e-12	2.01e-09	2.03269	4.52992	61.8167	3.77e-15	1.06e-11
1:1:3270725	Hypo	1H	3270725	1	1.4771	3.93014	33.285	7.96e-09	1.49e-06	1.74779	4.11228	55.4538	9.57e-14	8.36e-11	1.8462	4.24853	38.5604	5.31e-10	9.56e-08
1:1:4060900	Hypo	1H	4060900	1	0.906139	4.65551	25.2463	5.05e-07	3.72e-05	1.26657	4.89288	49.0463	2.5e-12	9.92e-10	0.754378	4.72577	11.291	0.000778838	0.00572424
1:1:4069036	Hyper	1H	4069036	1	-0.846957	3.93163	14.7713	0.000121369	0.00231542	-0.833311	3.96592	12.0029	0.000531183	0.00518675	-0.977897	4.21407	13.0698	0.000300096	0.002791
1:1:4135601	Hyper	1H	4135601	1	-0.634389	6.23196	22.4177	2.19e-06	0.000113993	-0.497436	6.2949	12.189	0.000480734	0.00480845	-0.991731	6.42018	33.939	5.69e-09	6.1e-07
1:1:5733019	Hypo	1H	5733019	1	1.11269	3.35024	13.8106	0.000202193	0.00337198	1.41319	3.52878	24.3054	8.22e-07	3.11e-05	1.92323	3.90127	27.3641	1.69e-07	8.59e-06
1:1:6690252	Hypo	1H	6690252	1	1.52163	3.14123	27.0132	2.02e-07	1.84e-05	1.40878	3.12577	20.6393	5.54e-06	0.000145864	1.44983	3.25733	16.8027	4.15e-05	0.000623332
1:1:7617341	Hypo	1H	7617341	1	1.22764	3.1978	17.4585	2.94e-05	0.000810427	1.72454	3.48499	44.4352	2.63e-11	6.62e-09	2.08763	3.75831	37.1782	1.08e-09	1.66e-07
1:1:8076854	Hypo	1H	8076854	1	1.01803	4.24074	25.2342	5.08e-07	3.73e-05	1.34374	4.45247	34.7366	3.77e-09	3.73e-07	1.1994	4.46711	21.2152	4.1e-06	0.000102548
1:1:8089264	Hypo	1H	8089264	1	1.40366	5.45779	25.8968	3.6e-07	2.88e-05	1.50176	5.54298	26.573	2.54e-07	1.2e-05	1.22745	5.46269	15.9045	6.66e-05	0.000895108
1:1:9838161	Hypo	1H	9838161	1	1.42564	3.53422	30.8335	2.81e-08	3.92e-06	1.56031	3.63296	40.9947	1.53e-10	2.68e-08	1.76847	3.83046	36.0964	1.88e-09	2.61e-07
1:1:10678162	Hypo	1H	10678162	1	1.17924	2.87654	13.9023	0.000192559	0.00325339	1.48951	3.0538	22.8841	1.72e-06	5.73e-05	1.74363	3.27154	24.5745	7.15e-07	2.67e-05
1:1:11003213	Hypo	1H	11003213	1	1.02253	3.76473	15.8484	6.86e-05	0.00153096	1.18879	3.88393	19.485	1.01e-05	0.000235886	1.4507	4.14241	19.3484	1.09e-05	0.000219449
1:1:11116332	Hypo	1H	11116332	1	1.13465	4.82169	44.6453	2.36e-11	1.91e-08	1.35159	4.97197	48.3775	3.52e-12	1.31e-09	1.24487	4.99707	30.4069	3.5e-08	2.54e-06
1:1:12204516	Hypo	1H	12204516	1	1.52657	2.34213	14.0846	0.000174772	0.0030338	1.77087	2.4839	18.1695	2.02e-05	0.00040498	2.36953	2.81994	24.4818	7.5e-07	2.77e-05
1:1:12285919	Hypo	1H	12285919	1	0.617826	4.83187	11.3104	0.000770759	0.00887599	0.674292	4.8858	13.9737	0.000185387	0.00232475	0.7155	5.04028	10.888	0.000967908	0.00672907
1:1:12593607	Hypo	1H	12593607	1	0.880717	3.43675	15.3867	8.76e-05	0.00183953	0.902646	3.48406	12.2606	0.000462624	0.00467259	1.06228	3.68834	15.0601	0.000104141	0.00125306
1:1:13741338	Hypo	1H	13741338	1	1.36414	2.96799	19.396	1.06e-05	0.000380669	1.14525	2.91987	15.8601	6.82e-05	0.00105187	1.845	3.33655	21.0167	4.55e-06	0.000111287
1:1:13943435	Hyper	1H	13943435	1	-0.693704	4.30728	12.3374	0.000443966	0.00597724	-0.791207	4.31026	14.0809	0.000175112	0.00222436	-1.27217	4.48057	28.0174	1.2e-07	6.68e-06
1:1:18332255	Hypo	1H	18332255	1	1.55746	2.82104	20.6402	5.54e-06	0.000234327	1.38108	2.80338	17.1957	3.37e-05	0.000608874	1.88374	3.10265	15.7636	7.18e-05	0.000946654
1:1:18691377	Hyper	1H	18691377	1	-1.12874	3.23918	19.3492	1.09e-05	0.000387103	-1.07824	3.30346	14.7399	0.000123409	0.00168879	-1.11944	3.56564	10.9827	0.000919639	0.00646821
1:1:18710620	Hypo	1H	18710620	1	0.851287	4.92699	16.5427	4.76e-05	0.00115413	0.783476	4.91095	11.0248	0.000899015	0.00772789	0.987185	5.13988	15.8411	6.89e-05	0.000917846
1:1:19235223	Hypo	1H	19235223	1	1.47326	2.76218	17.7523	2.52e-05	0.000725024	1.75292	2.92616	23.1059	1.53e-06	5.21e-05	1.8727	3.09034	19.1466	1.21e-05	0.00023928
1:1:19384676	Hypo	1H	19384676	1	1.34006	3.94988	28.922	7.54e-08	8.66e-06	1.38142	3.99513	35.4576	2.61e-09	2.74e-07	1.70385	4.26808	27.1954	1.84e-07	9.22e-06
1:1:19423050	Hypo	1H	19423050	1	1.56813	3.09312	22.0938	2.6e-06	0.000130217	1.48715	3.09003	22.2713	2.37e-06	7.42e-05	2.20423	3.53827	34.533	4.19e-09	4.86e-07
1:1:19726339	Hypo	1H	19726339	1	0.788692	4.37139	13.9805	0.000184721	0.0031577	1.02126	4.52654	22.5425	2.06e-06	6.61e-05	0.993901	4.62471	15.2557	9.39e-05	0.00115515
1:1:19782426	Hyper	1H	19782426	1	-1.47052	5.52142	44.278	2.85e-11	2.2e-08	-1.40217	5.56315	32.2413	1.36e-08	1.06e-06	-2.37665	5.74978	72.0865	2.06e-17	2.26e-13
1:1:23913435	Hypo	1H	23913435	1	1.12475	3.66607	19.2145	1.17e-05	0.000407889	1.41399	3.84967	27.2016	1.83e-07	9.2e-06	1.50928	3.98866	23.9979	9.64e-07	3.37e-05
1:1:23962993	Hypo	1H	23962993	1	1.19098	3.89975	25.687	4.02e-07	3.13e-05	1.57343	4.16602	31.0898	2.46e-08	1.77e-06	1.86513	4.43639	31.2313	2.29e-08	1.83e-06
1:1:27478457	Hypo	1H	27478457	1	1.50776	3.06379	27.5714	1.51e-07	1.47e-05	1.21312	2.97535	12.7808	0.000350199	0.00379338	2.09746	3.47954	24.6516	6.87e-07	2.58e-05
1:1:27490772	Hypo	1H	27490772	1	1.1467	2.84835	11.4388	0.000719249	0.00844597	1.62146	3.0887	32.0585	1.5e-08	1.14e-06	1.56872	3.18455	18.4248	1.77e-05	0.000321311
1:1:27503532	Hypo	1H	27503532	1	1.57263	2.85966	20.7214	5.31e-06	0.000226766	1.27607	2.78561	12.2098	0.000475404	0.00476986	1.54982	3.01011	13.1624	0.000285628	0.00268891
1:1:29988669	Hypo	1H	29988669	1	0.866215	4.52401	18.5645	1.64e-05	0.000524517	1.16889	4.72839	32.8097	1.02e-08	8.3e-07	1.17575	4.83348	25.3587	4.76e-07	1.95e-05
1:1:30033393	Hypo	1H	30033393	1	1.56386	3.07752	16.856	4.03e-05	0.00102417	1.85686	3.26785	22.363	2.26e-06	7.14e-05	1.59815	3.25225	11.1486	0.000840934	0.00605531
1:1:30853824	Hypo	1H	30853824	1	1.32914	4.51265	34.746	3.76e-09	8.54e-07	1.54644	4.67302	43.3564	4.56e-11	1.04e-08	1.28825	4.60512	22.0503	2.66e-06	7.35e-05
1:1:31498962	Hyper	1H	31498962	1	-1.06152	7.28187	33.1101	8.71e-09	1.59e-06	-0.944222	7.32166	20.6606	5.48e-06	0.000144679	-1.36801	7.53526	33.2287	8.19e-09	8.07e-07
1:1:36528406	Hyper	1H	36528406	1	-0.790555	4.58333	13.9029	0.000192501	0.00325288	-0.867039	4.58589	12.5748	0.000390982	0.00411991	-1.79685	4.69608	42.6147	6.67e-11	1.9e-08
1:1:36788764	Hypo	1H	36788764	1	1.44879	2.51205	14.6981	0.000126174	0.0023872	1.99277	2.77506	29.5489	5.45e-08	3.39e-06	2.33334	3.02874	27.3313	1.71e-07	8.71e-06
1:1:36924716	Hypo	1H	36924716	1	1.01703	3.03599	11.2971	0.000776287	0.00891808	1.30446	3.20512	18.5629	1.64e-05	0.000343776	1.76223	3.52263	22.972	1.64e-06	5.1e-05
1:1:37618799	Hypo	1H	37618799	1	0.993126	3.54331	14.7875	0.000120331	0.00230115	0.988178	3.5672	15.7738	7.14e-05	0.00109046	1.22273	3.81479	15.8239	6.95e-05	0.000924373
1:1:37643667	Hypo	1H	37643667	1	1.08327	3.80274	12.8663	0.00033456	0.00487263	1.3484	3.98589	22.624	1.97e-06	6.39e-05	1.34561	4.07679	16.3401	5.29e-05	0.000749774
1:1:38322509	Hyper	1H	38322509	1	-1.07706	4.82037	23.35	1.35e-06	7.81e-05	-1.03376	4.8556	20.0526	7.53e-06	0.000186346	-0.871431	5.19267	11.3772	0.000743508	0.00553713
1:2:39853288	Hyper	1H	39853288	2	-0.622254	4.97329	12.0415	0.000520287	0.00670255	-0.845315	4.92224	19.4581	1.03e-05	0.000238276	-1.3758	5.08479	33.7792	6.17e-09	6.5e-07
1:1:40515122	Hyper	1H	40515122	1	-0.988366	2.93542	13.1547	0.000286797	0.00435198	-1.29789	2.95974	19.7456	8.85e-06	0.000211768	-1.44979	3.19609	16.0549	6.15e-05	0.000841976
1:1:41248892	Hypo	1H	41248892	1	1.28177	3.30703	21.2555	4.02e-06	0.000182386	1.28408	3.34279	17.8409	2.4e-05	0.00046506	1.2297	3.42891	12.0048	0.00053064	0.00428269
1:1:41252802	Hypo	1H	41252802	1	1.20963	2.62608	12.1794	0.000483198	0.00635995	1.12485	2.64348	11.5708	0.000669954	0.00617279	1.52038	2.91662	17.1648	3.43e-05	0.000539408
1:1:41565835	Hypo	1H	41565835	1	1.02408	3.87312	15.6068	7.8e-05	0.00169009	1.01728	3.88536	20.6165	5.61e-06	0.000147214	1.14581	4.09139	13.5703	0.000229788	0.00228593
1:1:41660381	Hypo	1H	41660381	1	1.45053	2.83148	21.4804	3.57e-06	0.000166515	1.83977	3.04408	34.5919	4.07e-09	3.96e-07	2.13202	3.25849	32.4727	1.21e-08	1.1e-06
1:1:41702643	Hypo	1H	41702643	1	1.02252	4.03168	17.492	2.89e-05	0.000801857	1.1779	4.14093	24.4802	7.51e-07	2.89e-05	1.3998	4.37897	19.3063	1.11e-05	0.000223076
1:1:41707900	Hyper	1H	41707900	1	-0.694018	4.92055	15.1291	0.000100406	0.00202209	-0.74749	4.92089	15.6225	7.73e-05	0.00115896	-0.924882	5.15735	15.4355	8.54e-05	0.00107434
1:1:41790839	Hypo	1H	41790839	1	1.63193	3.0482	25.299	4.91e-07	3.65e-05	1.5561	3.04872	25.2487	5.04e-07	2.1e-05	1.65631	3.20616	16.0323	6.23e-05	0.000849491
1:1:41927505	Hypo	1H	41927505	1	1.07072	3.24859	17.1557	3.44e-05	0.000913219	1.09308	3.28248	12.355	0.000439809	0.00450258	1.0975	3.41531	14.1567	0.0001682	0.00179752
1:1:41993272	Hypo	1H	41993272	1	1.8087	2.70937	27.7981	1.35e-07	1.35e-05	2.09103	2.86488	29.3226	6.13e-08	3.73e-06	2.47611	3.12518	25.7983	3.79e-07	1.63e-05
1:1:42649524	Hypo	1H	42649524	1	1.4532	3.87482	36.4689	1.55e-09	4.32e-07	1.66897	4.02389	46.3893	9.69e-12	2.94e-09	1.61138	4.07294	33.0696	8.89e-09	8.58e-07
1:1:42681097	Hypo	1H	42681097	1	1.33407	3.00535	15.5459	8.05e-05	0.00172846	1.81334	3.26314	34.4303	4.42e-09	4.22e-07	1.44989	3.21441	14.4893	0.000140956	0.00157443
1:2:43723350	Hypo	1H	43723350	2	0.882771	5.75172	20.3429	6.47e-06	0.000262066	1.07383	5.89655	25.4766	4.48e-07	1.91e-05	1.07175	5.99597	21.8895	2.89e-06	7.82e-05
1:1:45435601	Hypo	1H	45435601	1	1.49222	2.50378	13.3596	0.000257097	0.00402509	1.68077	2.62629	19.1578	1.2e-05	0.000269335	2.07804	2.89602	19.4276	1.04e-05	0.000212275
1:1:45453467	Hypo	1H	45453467	1	0.9874	5.36974	35.0843	3.16e-09	7.46e-07	1.19942	5.52764	47.9996	4.26e-12	1.52e-09	1.19152	5.61453	35.6198	2.4e-09	3.11e-07
1:1:45464100	Hypo	1H	45464100	1	0.920336	3.6724	15.9507	6.5e-05	0.00146826	1.07735	3.7772	22.5431	2.05e-06	6.6e-05	1.02485	3.89187	10.1167	0.00146929	0.00924113
1:1:46355055	Hypo	1H	46355055	1	1.08801	3.93706	12.7078	0.000364124	0.00518523	1.26135	4.06652	23.7579	1.09e-06	3.93e-05	1.77809	4.47335	22.7357	1.86e-06	5.62e-05
1:1:46479988	Hypo	1H	46479988	1	1.24207	3.46202	21.594	3.37e-06	0.000159124	1.49569	3.62356	33.8942	5.82e-09	5.24e-07	1.36123	3.66831	14.6724	0.000127904	0.00146523
1:1:46486063	Hypo	1H	46486063	1	0.7444	4.06775	11.028	0.000897461	0.00986925	1.06231	4.2684	21.8723	2.91e-06	8.75e-05	0.964409	4.3398	13.9419	0.000188553	0.00196545
1:1:47243880	Hypo	1H	47243880	1	1.18095	3.62158	17.546	2.8e-05	0.000785825	1.38539	3.75685	27.2576	1.78e-07	8.99e-06	1.44545	3.88655	23.8681	1.03e-06	3.56e-05
1:1:47517817	Hypo	1H	47517817	1	1.11359	2.79904	11.0401	0.000891598	0.00982566	1.27234	2.9079	14.9018	0.000113253	0.00157649	1.39274	3.08231	12.3903	0.000431571	0.0036688
1:1:47620332	Hypo	1H	47620332	1	0.618128	6.52523	20.0913	7.38e-06	0.000290693	0.756963	6.62924	19.9141	8.1e-06	0.00019738	0.768829	6.761	17.4091	3.01e-05	0.000489162
1:1:48786997	Hypo	1H	48786997	1	1.22139	2.85754	12.628	0.000380007	0.00534492	1.49772	3.01433	22.7477	1.85e-06	6.07e-05	1.49614	3.13569	15.0478	0.000104821	0.00125849
1:1:49018732	Hypo	1H	49018732	1	0.902481	5.46266	23.7725	1.08e-06	6.67e-05	0.849661	5.44493	21.1506	4.25e-06	0.000118425	0.869932	5.5806	15.6147	7.76e-05	0.00100223
1:1:49032378	Hypo	1H	49032378	1	0.70182	4.31069	13.8143	0.00020179	0.00336778	1.05649	4.52962	30.9533	2.64e-08	1.88e-06	1.1615	4.6893	28.5101	9.32e-08	5.46e-06
1:1:49063108	Hypo	1H	49063108	1	1.37343	3.72618	23.6222	1.17e-06	7.05e-05	1.41417	3.77165	23.6419	1.16e-06	4.13e-05	1.63548	3.98098	26.7316	2.34e-07	1.11e-05
1:1:49108242	Hypo	1H	49108242	1	1.21743	4.30786	25.3728	4.73e-07	3.55e-05	1.49323	4.49351	46.2102	1.06e-11	3.11e-09	1.1354	4.39277	15.5846	7.89e-05	0.0010143
1:1:49183785	Hyper	1H	49183785	1	-0.783567	4.70709	20.2528	6.79e-06	0.000272207	-0.893639	4.69566	27.1896	1.84e-07	9.25e-06	-1.03738	4.946	26.3372	2.87e-07	1.3e-05
1:1:49927133	Hypo	1H	49927133	1	1.33653	3.10801	15.1265	0.000100539	0.0020241	1.58285	3.2648	23.8894	1.02e-06	3.71e-05	1.98517	3.55135	30.7798	2.89e-08	2.2e-06
1:1:49987586	Hypo	1H	49987586	1	1.38707	2.48221	14.4983	0.000140287	0.0025832	1.93302	2.74626	26.7651	2.3e-07	1.1e-05	1.67636	2.76369	12.24	0.000467755	0.0038939
1:1:50387289	Hypo	1H	50387289	1	0.651014	5.52197	14.476	0.000141955	0.00260546	0.855627	5.6637	21.3375	3.85e-06	0.000109408	0.902568	5.81615	17.9572	2.26e-05	0.000389415
1:1:50387317	Hypo	1H	50387317	1	1.03401	5.01386	20.3008	6.62e-06	0.000266843	1.09907	5.07544	24.2882	8.29e-07	3.14e-05	1.14764	5.20397	16.1507	5.85e-05	0.000809778
1:1:53042471	Hypo	1H	53042471	1	1.34721	2.89161	19.0002	1.31e-05	0.000443772	1.79993	3.13631	44.5577	2.47e-11	6.31e-09	1.6695	3.18002	24.1399	8.96e-07	3.2e-05
1:1:55787623	Hypo	1H	55787623	1	1.02507	4.02962	22.301	2.33e-06	0.000119724	1.28879	4.20463	38.7891	4.72e-10	6.82e-08	1.12647	4.21157	19.1863	1.19e-05	0.000235066
1:1:59896136	Hypo	1H	59896136	1	1.05193	5.2357	25.3351	4.82e-07	3.6e-05	1.29548	5.41558	41.4835	1.19e-10	2.2e-08	1.55568	5.65587	42.3171	7.76e-11	2.18e-08
1:1:60031584	Hyper	1H	60031584	1	-1.01976	3.44886	17.7156	2.57e-05	0.000734873	-1.09465	3.48033	17.9789	2.23e-05	0.000438339	-1.29582	3.72324	17.5315	2.83e-05	0.00046501
1:1:60286044	Hypo	1H	60286044	1	1.28646	4.1889	36.131	1.84e-09	4.9e-07	1.67513	4.44885	51.6085	6.77e-13	3.55e-10	1.9734	4.69887	57.7641	2.96e-14	5.12e-11
1:1:60350091	Hypo	1H	60350091	1	1.83039	3.13159	33.5907	6.8e-09	1.32e-06	1.33517	2.94089	15.6074	7.79e-05	0.00116616	1.46022	3.1124	14.2043	0.000163997	0.00176329
1:1:60438852	Hypo	1H	60438852	1	0.965232	4.80941	28.4515	9.61e-08	1.04e-05	0.836645	4.75654	17.4014	3.03e-05	0.00055816	0.884413	4.90138	15.9688	6.44e-05	0.000871017
1:1:60651997	Hypo	1H	60651997	1	1.51722	3.19081	23.7698	1.09e-06	6.67e-05	1.78572	3.36424	32.0786	1.48e-08	1.13e-06	1.74127	3.43456	23.1691	1.48e-06	4.73e-05
1:1:60985613	Hypo	1H	60985613	1	1.73361	2.43766	18.879	1.39e-05	0.000465534	2.11887	2.63664	31.4553	2.04e-08	1.5e-06	1.83458	2.65727	17.6082	2.71e-05	0.000450438
1:1:61036520	Hypo	1H	61036520	1	1.91849	2.47891	19.1766	1.19e-05	0.000413526	1.60672	2.43653	13.0795	0.000298547	0.00335594	2.03865	2.68381	22.813	1.79e-06	5.45e-05
1:1:61791254	Hyper	1H	61791254	1	-0.987021	3.30475	13.5744	0.000229292	0.00369691	-0.897599	3.37585	11.7432	0.000610645	0.00575549	-1.805	3.51326	27.3403	1.71e-07	8.68e-06
1:1:62126694	Hypo	1H	62126694	1	0.781836	4.4147	14.0099	0.000181854	0.00312214	0.859202	4.48703	14.4628	0.000142953	0.00189567	0.949456	4.65951	15.3232	9.06e-05	0.00112378
1:1:62199205	Hypo	1H	62199205	1	0.802367	5.49879	31.7916	1.72e-08	2.68e-06	0.829001	5.53178	27.9402	1.25e-07	6.74e-06	0.729576	5.59962	17.1495	3.45e-05	0.000542479
1:1:62402139	Hypo	1H	62402139	1	1.4823	2.75047	14.3982	0.000147946	0.00268193	1.54012	2.81946	14.7074	0.000125551	0.00171328	1.8505	3.05396	22.1802	2.48e-06	6.98e-05
1:1:62464717	Hypo	1H	62464717	1	0.811996	5.22647	25.5567	4.3e-07	3.3e-05	0.846532	5.26408	23.3767	1.33e-06	4.63e-05	0.852087	5.3846	19.4415	1.04e-05	0.000210949
1:1:62840856	Hypo	1H	62840856	1	1.31049	4.38399	36.7171	1.37e-09	3.92e-07	1.43454	4.48299	35.5313	2.51e-09	2.66e-07	1.70565	4.72202	50.6126	1.13e-12	7.66e-10
1:1:63024975	Hypo	1H	63024975	1	0.907841	3.74072	15.1134	0.000101242	0.00203445	1.32615	3.99062	28.8455	7.84e-08	4.59e-06	1.28698	4.06059	20.1966	6.99e-06	0.000154628
1:1:63992052	Hypo	1H	63992052	1	1.77445	2.62306	27.4241	1.63e-07	1.56e-05	1.89152	2.71293	27.1435	1.89e-07	9.44e-06	1.85072	2.80798	14.0293	0.000179983	0.00189635
1:1:64088818	Hypo	1H	64088818	1	0.960978	3.73671	17.2852	3.22e-05	0.000867504	1.15188	3.86679	20.1754	7.07e-06	0.000176748	1.25404	4.02419	20.789	5.13e-06	0.00012191
1:1:64735876	Hypo	1H	64735876	1	0.785645	5.80536	27.0818	1.95e-07	1.79e-05	0.755342	5.80692	20.9501	4.71e-06	0.000128626	0.744111	5.93165	17.3807	3.06e-05	0.000494724
1:1:64935883	Hypo	1H	64935883	1	1.11319	3.84778	26.9392	2.1e-07	1.89e-05	1.21613	3.93072	25.7067	3.97e-07	1.73e-05	1.022	3.94891	15.2813	9.26e-05	0.00114372
1:1:64953594	Hypo	1H	64953594	1	1.29774	4.60912	36.183	1.8e-09	4.81e-07	1.50161	4.75598	39.8009	2.81e-10	4.39e-08	1.49813	4.82633	34.6566	3.93e-09	4.62e-07
1:1:65614635	Hypo	1H	65614635	1	1.024	3.03308	11.7823	0.000597979	0.0074199	1.24282	3.17223	17.265	3.25e-05	0.000591082	1.08777	3.23297	10.5887	0.00113784	0.00758563
1:1:65631288	Hypo	1H	65631288	1	1.13369	3.63834	25.6919	4.01e-07	3.12e-05	1.39653	3.8072	32.2418	1.36e-08	1.06e-06	1.3703	3.88765	25.0721	5.52e-07	2.18e-05
1:1:65762024	Hypo	1H	65762024	1	0.814835	4.52865	20.4594	6.09e-06	0.000250245	0.937538	4.6273	19.4708	1.02e-05	0.000237179	0.821956	4.68749	13.3087	0.000264175	0.00253182
1:1:65903291	Hypo	1H	65903291	1	1.34313	3.36766	16.2799	5.46e-05	0.00128114	1.82665	3.66333	36.043	1.93e-09	2.15e-07	1.42751	3.54081	15.2366	9.48e-05	0.0011643
1:1:66292328	Hypo	1H	66292328	1	1.26874	2.69606	14.5969	0.000133131	0.00248331	1.74635	2.94004	27.7085	1.41e-07	7.43e-06	1.7117	3.02956	20.6929	5.39e-06	0.000126596
1:1:66373624	Hypo	1H	66373624	1	0.987954	4.2677	24.6662	6.82e-07	4.66e-05	1.05556	4.32669	25.0285	5.65e-07	2.3e-05	0.969971	4.40166	16.601	4.61e-05	0.000675485
1:1:66423051	Hypo	1H	66423051	1	1.65736	3.26541	38.0736	6.81e-10	2.3e-07	1.73392	3.33577	35.9361	2.04e-09	2.25e-07	1.68509	3.40374	26.5528	2.56e-07	1.19e-05
1:1:66613786	Hypo	1H	66613786	1	1.37394	3.39939	25.1354	5.34e-07	3.87e-05	1.46561	3.48001	26.1548	3.15e-07	1.43e-05	1.15264	3.4446	12.759	0.000354295	0.00315905
1:1:66737725	Hyper	1H	66737725	1	-1.56671	2.647	23.471	1.27e-06	7.45e-05	-1.83789	2.69447	26.5399	2.58e-07	1.22e-05	-1.70839	2.9848	16.6704	4.45e-05	0.000658635
1:1:71630511	Hypo	1H	71630511	1	2.06819	2.91223	42.4903	7.1e-11	4.21e-08	2.31713	3.06123	41.9136	9.54e-11	1.83e-08	2.2124	3.08181	28.8616	7.77e-08	4.71e-06
1:1:72103191	Hypo	1H	72103191	1	1.28417	4.01639	27.471	1.59e-07	1.54e-05	1.55135	4.19419	38.0144	7.02e-10	9.34e-08	1.85956	4.45259	49.4527	2.03e-12	1.23e-09
1:1:73653500	Hypo	1H	73653500	1	1.0509	4.61737	31.7632	1.74e-08	2.71e-06	1.48038	4.90805	55.7275	8.32e-14	7.65e-11	1.5919	5.04595	55.445	9.61e-14	1.2e-10
1:1:73758088	Hypo	1H	73758088	1	1.12722	5.25347	37.246	1.04e-09	3.18e-07	1.42685	5.47313	57.4747	3.42e-14	3.88e-11	1.50131	5.58635	51.6925	6.49e-13	5.17e-10
1:1:73984879	Hypo	1H	73984879	1	1.33564	3.8538	33.0759	8.86e-09	1.61e-06	1.67707	4.07871	57.1452	4.05e-14	4.45e-11	2.14606	4.42244	66.0039	4.5e-16	2.02e-12
1:1:74480195	Hypo	1H	74480195	1	1.26162	2.85817	15.4578	8.44e-05	0.00178944	1.37134	2.95735	16.2947	5.42e-05	0.000878816	1.43736	3.1085	12.6238	0.000380868	0.00333395
1:1:75019377	Hypo	1H	75019377	1	1.32146	5.01878	36.4315	1.58e-09	4.38e-07	1.45001	5.11907	31.4687	2.03e-08	1.49e-06	1.50729	5.23995	20.6218	5.6e-06	0.000130333
1:1:75241491	Hypo	1H	75241491	1	1.21536	3.35594	24.6867	6.74e-07	4.62e-05	1.46591	3.52336	27.7578	1.37e-07	7.28e-06	1.20949	3.51156	16.3784	5.19e-05	0.000738888
1:1:75434256	Hypo	1H	75434256	1	1.41793	2.81657	16.6202	4.57e-05	0.00111868	1.59967	2.94076	25.1211	5.38e-07	2.21e-05	1.57036	3.0334	18.7007	1.53e-05	0.000287597
1:1:75540230	Hypo	1H	75540230	1	1.2516	3.26444	21.2838	3.96e-06	0.000180327	1.47561	3.41162	27.6146	1.48e-07	7.71e-06	1.21397	3.40059	16.9671	3.8e-05	0.000582275
1:2:75674530	Hypo	1H	75674530	2	0.776612	4.01756	11.4766	0.000704761	0.0083212	0.897536	4.11185	14.5482	0.000136616	0.0018315	0.902132	4.24086	12.4794	0.00041147	0.00353722
1:1:76141375	Hyper	1H	76141375	1	-0.662711	5.30661	19.1472	1.21e-05	0.000417774	-0.536127	5.36652	13.4047	0.000250997	0.00293867	-0.915556	5.52484	22.09	2.6e-06	7.24e-05
1:1:76227472	Hyper	1H	76227472	1	-1.11866	4.28586	20.0864	7.4e-06	0.00029134	-0.953071	4.35445	14.1518	0.000168639	0.00216168	-2.12815	4.46834	42.5101	7.03e-11	2e-08
1:1:76234583	Hypo	1H	76234583	1	0.90538	5.88861	22.5159	2.08e-06	0.000109702	0.995828	5.96731	26.7017	2.37e-07	1.14e-05	1.14327	6.16538	20.2143	6.92e-06	0.00015348
1:2:76238345	Hyper	1H	76238345	2	-1.16218	3.26743	17.1507	3.45e-05	0.000914791	-1.06319	3.35246	14.3539	0.000151469	0.0019841	-1.31469	3.57712	15.0918	0.000102409	0.00123766
1:1:76315874	Hypo	1H	76315874	1	1.47041	5.10258	47.6755	5.03e-12	6.29e-09	1.4062	5.08119	43.1286	5.13e-11	1.14e-08	0.975261	4.92012	13.1946	0.00028075	0.00265206
1:1:77710935	Hypo	1H	77710935	1	0.790192	4.34426	17.31	3.18e-05	0.000859895	0.815246	4.38746	12.2615	0.000462407	0.00467146	1.11305	4.65897	23.3768	1.33e-06	4.34e-05
1:1:78118750	Hypo	1H	78118750	1	0.977927	5.39976	23.7269	1.11e-06	6.79e-05	1.14581	5.52783	34.5657	4.12e-09	4e-07	1.29423	5.71014	26.0962	3.25e-07	1.45e-05
1:1:78144500	Hypo	1H	78144500	1	0.654751	6.29724	15.0736	0.000103401	0.00206808	0.818405	6.4186	19.3848	1.07e-05	0.00024536	0.776143	6.52102	12.0067	0.000530096	0.00428005
1:1:79024507	Hypo	1H	79024507	1	0.856988	3.57435	12.3264	0.000446592	0.00600742	1.14834	3.75557	18.5609	1.65e-05	0.000344062	1.00167	3.80571	10.2542	0.00136372	0.00873295
1:1:79026918	Hypo	1H	79026918	1	0.634981	4.87307	15.0147	0.000106676	0.00211403	0.796971	4.98843	19.6469	9.32e-06	0.000220409	0.713474	5.07111	11.933	0.000551484	0.00441375
1:1:82688045	Hypo	1H	82688045	1	1.43493	2.52445	15.1431	9.97e-05	0.00201219	1.59749	2.6382	18.1103	2.08e-05	0.000415043	1.30903	2.68087	10.2249	0.00138559	0.00883687
1:1:83806867	Hypo	1H	83806867	1	1.21934	2.91541	16.4768	4.92e-05	0.00118457	1.31762	3.00303	16.7392	4.29e-05	0.000734477	1.33443	3.13446	13.778	0.000205726	0.00210055
1:1:91430105	Hypo	1H	91430105	1	1.26875	5.03013	39.411	3.43e-10	1.38e-07	1.21282	5.01207	37.2431	1.04e-09	1.28e-07	1.28134	5.14342	31.4362	2.06e-08	1.69e-06
1:1:92236894	Hypo	1H	92236894	1	1.17961	3.70931	27.6325	1.47e-07	1.44e-05	1.08446	3.68589	17.1855	3.39e-05	0.000611434	1.09371	3.80771	15.9425	6.53e-05	0.000880963
1:1:95441762	Hypo	1H	95441762	1	2.17995	2.64377	29.2096	6.5e-08	7.7e-06	2.75648	2.93499	37.2452	1.04e-09	1.28e-07	3.32304	3.30916	70.326	5.03e-17	4.14e-13
1:1:95781686	Hypo	1H	95781686	1	1.61901	3.14238	26.5351	2.59e-07	2.22e-05	1.53085	3.13831	27.4434	1.62e-07	8.3e-06	1.6397	3.27981	20.3091	6.59e-06	0.000147648
1:1:108508206	Hypo	1H	108508206	1	1.74338	3.02139	33.4765	7.21e-09	1.37e-06	1.69774	3.0437	23.3789	1.33e-06	4.63e-05	2.03399	3.29944	28.8099	7.98e-08	4.81e-06
1:1:108792974	Hyper	1H	108792974	1	-1.26027	3.32435	31.1032	2.45e-08	3.54e-06	-0.785566	3.48294	11.6018	0.000658871	0.00609576	-1.53686	3.62341	25.7305	3.93e-07	1.67e-05
1:1:113773756	Hypo	1H	113773756	1	0.968897	3.15166	11.9379	0.000550045	0.0069871	1.37453	3.37488	24.4001	7.83e-07	2.99e-05	2.32267	3.99708	29.4316	5.79e-08	3.7e-06
1:1:118229566	Hypo	1H	118229566	1	0.989358	3.60257	15.2307	9.51e-05	0.0019485	1.30359	3.79082	29.3717	5.97e-08	3.67e-06	1.69782	4.11342	30.4767	3.38e-08	2.47e-06
1:1:122452396	Hypo	1H	122452396	1	1.42317	3.70949	38.9232	4.41e-10	1.65e-07	1.38911	3.71808	28.3472	1.01e-07	5.68e-06	1.33088	3.80724	16.3362	5.3e-05	0.000750864
1:1:122854981	Hypo	1H	122854981	1	0.93109	4.15551	17.8803	2.35e-05	0.000687943	1.16881	4.31238	29.1528	6.69e-08	4.01e-06	0.904061	4.29889	10.9494	0.000936342	0.0065623
1:1:122950468	Hypo	1H	122950468	1	0.870055	5.91873	38.1573	6.53e-10	2.23e-07	0.823163	5.90608	29.8362	4.7e-08	3.02e-06	0.724578	5.97642	16.2115	5.66e-05	0.000789294
1:1:123183423	Hypo	1H	123183423	1	1.72205	2.77423	23.5327	1.23e-06	7.29e-05	1.90146	2.89595	30.0589	4.19e-08	2.73e-06	2.60084	3.32519	40.0206	2.51e-10	5.36e-08
1:1:123726336	Hypo	1H	123726336	1	1.36396	4.31666	39.4836	3.31e-10	1.35e-07	1.70788	4.55449	52.1045	5.26e-13	2.95e-10	1.70726	4.61386	43.0089	5.45e-11	1.64e-08
1:1:123838988	Hypo	1H	123838988	1	1.33678	3.70864	27.5724	1.51e-07	1.47e-05	1.71403	3.94798	49.7849	1.72e-12	7.52e-10	2.00765	4.19929	44.9365	2.04e-11	7.6e-09
1:1:123846941	Hypo	1H	123846941	1	0.579881	5.60198	21.5286	3.49e-06	0.000162829	0.68457	5.67506	19.2181	1.17e-05	0.000263027	0.749619	5.84559	17.7215	2.56e-05	0.00042844
1:1:124150083	Hypo	1H	124150083	1	1.17951	2.74649	13.7635	0.000207323	0.00343317	1.20051	2.8001	13.8759	0.000195287	0.0024244	1.24328	2.94954	11.3745	0.000744592	0.00554228
1:1:124273063	Hyper	1H	124273063	1	-1.36987	2.76128	14.6832	0.000127175	0.00240246	-1.45494	2.82212	14.5831	0.000134113	0.00180479	-1.46842	3.10004	12.7763	0.000351039	0.0031371
1:2:125008043	Hypo	1H	125008043	2	1.33689	3.0618	13.7118	0.000213108	0.00350555	1.13085	3.01791	10.4419	0.0012319	0.00980735	1.82584	3.4498	17.7225	2.56e-05	0.000428345
1:2:125008341	Hyper	1H	125008341	2	-1.05854	6.09919	33.4326	7.38e-09	1.4e-06	-0.806205	6.18344	19.1011	1.24e-05	0.000275446	-1.11579	6.41008	25.0385	5.62e-07	2.21e-05
1:1:125170367	Hypo	1H	125170367	1	1.58754	2.89162	25.141	5.33e-07	3.87e-05	1.89923	3.07458	34.9817	3.33e-09	3.37e-07	1.5893	3.04017	20.3814	6.34e-06	0.00014338
1:2:125194425	Hypo	1H	125194425	2	1.08135	3.7837	22.8307	1.77e-06	9.63e-05	0.992574	3.76877	17.0628	3.62e-05	0.000643438	1.07652	3.92696	19.5723	9.69e-06	0.000199953
1:1:125215288	Hypo	1H	125215288	1	1.34407	2.58687	13.4242	0.000248397	0.00392813	2.14442	2.96999	38.7114	4.91e-10	7.06e-08	2.03164	3.00579	25.9157	3.57e-07	1.55e-05
1:1:125243244	Hypo	1H	125243244	1	1.2794	2.45763	12.2941	0.000454383	0.00608378	1.2656	2.51632	11.3015	0.000774448	0.00688965	1.62503	2.76669	12.6151	0.000382637	0.00334647
1:1:126057401	Hypo	1H	126057401	1	1.03364	3.65626	20.0469	7.56e-06	0.000295475	1.36083	3.85815	32.234	1.37e-08	1.06e-06	1.37298	3.96402	24.9624	5.85e-07	2.28e-05
1:1:126183945	Hypo	1H	126183945	1	1.15672	4.14631	25.5341	4.35e-07	3.33e-05	1.51115	4.38425	39.4036	3.45e-10	5.2e-08	1.69427	4.57071	39.2023	3.82e-10	7.5e-08
1:1:126236770	Hypo	1H	126236770	1	1.04754	4.16597	17.1519	3.45e-05	0.000914386	1.55819	4.49366	41.5045	1.18e-10	2.18e-08	1.56538	4.57653	36.3139	1.68e-09	2.41e-07
1:1:126252350	Hypo	1H	126252350	1	1.27412	3.05282	18.6824	1.54e-05	0.000500361	1.05272	3.00171	11.0158	0.000903369	0.00775217	1.2079	3.19536	12.6444	0.000376692	0.00330649
1:1:126413333	Hypo	1H	126413333	1	1.44818	3.22141	24.5567	7.22e-07	4.85e-05	1.98954	3.54775	47.3642	5.89e-12	1.95e-09	2.40034	3.84931	48.649	3.06e-12	1.71e-09
1:1:126725248	Hypo	1H	126725248	1	0.941587	3.50193	11.7515	0.000607936	0.00750857	1.29069	3.72335	20.3355	6.5e-06	0.000165289	1.71266	4.05054	27.8561	1.31e-07	7.1e-06
1:1:126952213	Hypo	1H	126952213	1	0.815762	4.05168	14.3577	0.000151164	0.00272697	1.15394	4.26381	27.9456	1.25e-07	6.72e-06	1.12562	4.36175	21.3882	3.75e-06	9.57e-05
1:1:127340962	Hypo	1H	127340962	1	0.982351	3.80387	17.4083	3.02e-05	0.000827713	0.968455	3.82446	14.3961	0.000148109	0.00195082	1.15619	4.03141	17.5388	2.82e-05	0.000463763
1:1:127358618	Hypo	1H	127358618	1	1.04071	4.2713	17.2319	3.31e-05	0.000885371	1.08112	4.31872	24.8663	6.14e-07	2.47e-05	1.27758	4.52599	29.3459	6.05e-08	3.84e-06
1:1:127631249	Hypo	1H	127631249	1	1.04191	5.47782	39.2948	3.64e-10	1.43e-07	0.97221	5.454	33.2653	8.04e-09	6.86e-07	1.07748	5.6181	30.3622	3.58e-08	2.57e-06
1:1:128695400	Hypo	1H	128695400	1	1.32164	3.17745	15.4434	8.5e-05	0.00179868	1.75095	3.42305	40.741	1.74e-10	2.96e-08	1.8849	3.58319	28.3385	1.02e-07	5.87e-06
1:1:128978210	Hyper	1H	128978210	1	-0.876548	3.17922	13.0728	0.000299617	0.00449342	-1.26295	3.16099	22.7935	1.8e-06	5.96e-05	-1.84174	3.37383	28.7303	8.32e-08	4.97e-06
1:1:128999834	Hypo	1H	128999834	1	0.722257	4.53927	14.7165	0.00012495	0.00236894	1.05433	4.75069	29.2832	6.25e-08	3.8e-06	0.928905	4.79978	17.3435	3.12e-05	0.000501868
1:1:129144674	Hypo	1H	129144674	1	1.25669	2.50554	11.1436	0.000843231	0.00945097	1.47139	2.63843	19.436	1.04e-05	0.000240386	1.88127	2.90097	19.1261	1.22e-05	0.000240947
1:1:129158350	Hypo	1H	129158350	1	1.46959	2.83116	20.038	7.59e-06	0.000296751	1.38153	2.84035	16.4646	4.96e-05	0.000820524	1.7008	3.08277	16.2677	5.5e-05	0.000772009
1:1:129976866	Hypo	1H	129976866	1	0.679031	4.58962	13.6873	0.000215914	0.00353975	0.866643	4.714	19.201	1.18e-05	0.000264491	1.11953	4.96311	28.8912	7.66e-08	4.66e-06
1:1:130234808	Hypo	1H	130234808	1	1.22797	4.84465	45.3467	1.65e-11	1.42e-08	1.25447	4.87949	36.3878	1.62e-09	1.86e-07	1.10221	4.89052	22.3916	2.22e-06	6.44e-05
1:1:130447872	Hypo	1H	130447872	1	0.847351	3.91812	13.5987	0.000226336	0.00366344	0.98522	4.02023	15.7596	7.19e-05	0.00109635	1.25401	4.26927	19.9642	7.89e-06	0.000170032
1:1:130549692	Hypo	1H	130549692	1	1.2306	2.82235	18.1874	2e-05	0.000610245	1.58194	3.01622	28.9392	7.47e-08	4.4e-06	1.28617	3.02666	12.9235	0.000324475	0.00296117
1:1:131514066	Hyper	1H	131514066	1	-1.74266	2.3078	19.7066	9.03e-06	0.000337634	-1.76663	2.40794	18.6467	1.57e-05	0.00033257	-1.75636	2.65519	13.6723	0.000217639	0.00219146
1:1:131551731	Hypo	1H	131551731	1	1.14254	3.4675	16.0731	6.09e-05	0.0013992	1.49232	3.68606	26.2928	2.93e-07	1.35e-05	1.74415	3.92976	24.3967	7.84e-07	2.87e-05
1:1:131928786	Hypo	1H	131928786	1	0.96381	5.21664	36.1765	1.8e-09	4.81e-07	1.10029	5.3206	39.6848	2.98e-10	4.62e-08	1.27089	5.51841	50.6284	1.12e-12	7.66e-10
1:2:131937835	Hypo	1H	131937835	2	0.906373	3.65163	17.4986	2.88e-05	0.000800202	1.22299	3.84118	26.3621	2.83e-07	1.31e-05	1.28127	3.97751	26.86	2.19e-07	1.05e-05
1:1:132958020	Hypo	1H	132958020	1	1.28836	2.69257	15.6173	7.75e-05	0.00168406	1.24116	2.72752	12.4554	0.000416793	0.0043169	1.74969	3.03945	17.0586	3.62e-05	0.000561832
1:1:132989197	Hypo	1H	132989197	1	1.00196	3.99348	23.8559	1.04e-06	6.46e-05	1.17235	4.10973	27.8483	1.31e-07	7.01e-06	1.21625	4.2295	24.221	8.59e-07	3.09e-05
1:1:133057104	Hypo	1H	133057104	1	1.31057	3.9204	29.0565	7.03e-08	8.2e-06	1.46408	4.03553	32.1789	1.41e-08	1.09e-06	1.32414	4.04962	23.8436	1.04e-06	3.6e-05
1:1:134091256	Hypo	1H	134091256	1	1.0544	3.03009	13.6832	0.000216381	0.00354569	1.27943	3.17109	19.9839	7.81e-06	0.00019166	1.41128	3.35884	16.1327	5.91e-05	0.000816031
1:1:134129878	Hypo	1H	134129878	1	1.05966	2.89511	12.5624	0.000393593	0.00547969	1.11644	2.96629	11.1482	0.000841141	0.00734021	1.49724	3.23714	21.1047	4.35e-06	0.000107471
1:1:134273739	Hypo	1H	134273739	1	1.03762	3.52483	13.6637	0.000218644	0.00357196	1.02978	3.55581	13.6897	0.000215631	0.00261436	1.14421	3.73433	13.6789	0.000216875	0.00218678
1:1:134557265	Hypo	1H	134557265	1	1.13734	3.13445	16.3736	5.2e-05	0.00123073	1.45721	3.31508	30.2243	3.85e-08	2.54e-06	1.2675	3.34854	16.9808	3.78e-05	0.000579235
1:1:135591186	Hypo	1H	135591186	1	1.28219	2.79994	13.7938	0.000204005	0.0033919	1.70231	3.02408	30.4435	3.44e-08	2.31e-06	1.65172	3.11562	14.5436	0.00013695	0.00154158
1:1:135766361	Hypo	1H	135766361	1	0.759007	3.97752	12.0963	0.000505217	0.0065668	0.936186	4.09972	15.6255	7.72e-05	0.00115784	1.0072	4.25388	17.0534	3.63e-05	0.000562745
1:1:136107768	Hypo	1H	136107768	1	1.61858	2.47831	15.0561	0.000104365	0.00208106	1.82483	2.60549	24.4486	7.63e-07	2.93e-05	1.56984	2.64822	13.2525	0.000272223	0.00258964
1:1:136760738	Hyper	1H	136760738	1	-1.04891	3.51896	19.6787	9.16e-06	0.000340983	-0.986235	3.5722	12.3758	0.000434933	0.00446442	-1.49879	3.7768	21.6125	3.34e-06	8.77e-05
1:2:136975767	Hyper	1H	136975767	2	-0.607795	5.12698	18.8837	1.39e-05	0.000464783	-0.696302	5.11703	21.5419	3.46e-06	0.000100699	-1.15138	5.28063	24.6593	6.84e-07	2.58e-05
1:1:137480557	Hypo	1H	137480557	1	1.55609	3.27185	26.9875	2.05e-07	1.86e-05	1.64949	3.35761	29.4885	5.63e-08	3.49e-06	1.97443	3.60966	32.3602	1.28e-08	1.16e-06
1:1:137731754	Hypo	1H	137731754	1	1.13645	5.54008	32.746	1.05e-08	1.86e-06	1.19654	5.60269	34.1958	4.98e-09	4.61e-07	0.808248	5.48851	10.4906	0.00119986	0.0079021
1:1:138134149	Hypo	1H	138134149	1	1.52461	2.69398	15.491	8.29e-05	0.00176477	1.83732	2.87089	27.5114	1.56e-07	8.07e-06	2.09605	3.08727	26.9111	2.13e-07	1.03e-05
1:1:138174715	Hypo	1H	138174715	1	1.07124	3.98514	22.1365	2.54e-06	0.000127895	1.32254	4.15342	29.9342	4.47e-08	2.89e-06	1.21489	4.20738	17.5944	2.73e-05	0.000452658
1:1:138464313	Hypo	1H	138464313	1	1.03465	3.06188	11.7277	0.000615765	0.00757276	1.34973	3.23949	19.9417	7.98e-06	0.000195055	1.51958	3.42626	23.2273	1.44e-06	4.63e-05
1:1:138816891	Hyper	1H	138816891	1	-1.41691	4.22583	44.1047	3.11e-11	2.3e-08	-0.933697	4.3812	19.8496	8.38e-06	0.000202792	-1.95987	4.50354	50.3406	1.29e-12	8.56e-10
1:1:139317811	Hypo	1H	139317811	1	1.17854	3.31716	17.3926	3.04e-05	0.000833261	1.68759	3.61398	42.7527	6.21e-11	1.33e-08	1.71864	3.71353	27.0333	2e-07	9.85e-06
1:1:139862951	Hyper	1H	139862951	1	-1.00744	2.68321	11.8947	0.000562943	0.00710394	-1.44079	2.68069	19.3176	1.11e-05	0.000252255	-1.98348	2.90165	21.4242	3.68e-06	9.44e-05
1:1:140032972	Hypo	1H	140032972	1	0.847454	4.25485	16.852	4.04e-05	0.00102574	1.03704	4.3841	23.6373	1.16e-06	4.14e-05	1.02006	4.50096	15.4881	8.3e-05	0.00105275
1:1:140571744	Hyper	1H	140571744	1	-0.578303	5.27301	17.2286	3.31e-05	0.000886294	-0.852242	5.19816	32.2931	1.33e-08	1.04e-06	-0.793243	5.49419	17.8455	2.4e-05	0.000408197
1:1:140614036	Hypo	1H	140614036	1	1.2964	2.72893	16.9235	3.89e-05	0.000999752	1.72672	2.94693	26.3012	2.92e-07	1.35e-05	1.6989	3.04488	20.2729	6.71e-06	0.000149918
1:1:140822387	Hypo	1H	140822387	1	1.00512	3.12106	12.1624	0.00048762	0.00640387	1.19826	3.24291	18.8205	1.44e-05	0.00030868	1.53832	3.50773	23.8439	1.04e-06	3.6e-05
1:1:141277711	Hypo	1H	141277711	1	1.29029	2.88769	16.6504	4.49e-05	0.0011085	1.44533	2.99613	20.6904	5.4e-06	0.00014302	1.51093	3.14185	13.1471	0.00028797	0.00270602
1:1:142033766	Hypo	1H	142033766	1	0.7501	4.41475	11.5181	0.000689231	0.00818981	0.713772	4.42634	11.2647	0.000789962	0.00699725	0.833912	4.60906	12.945	0.00032077	0.00293462
1:2:142756133	Hyper	1H	142756133	2	-1.20006	2.84771	17.3609	3.09e-05	0.000842391	-1.07144	2.93126	13.7905	0.000204365	0.00250827	-1.67006	3.13661	17.993	2.22e-05	0.000383515
1:1:143214005	Hypo	1H	143214005	1	1.40803	2.38957	13.8951	0.000193301	0.00326361	1.66369	2.5352	19.577	9.66e-06	0.000226782	1.71396	2.67042	17.0116	3.72e-05	0.000571975
1:1:143455052	Hypo	1H	143455052	1	0.869489	13.0167	24.2252	8.57e-07	5.55e-05	0.894934	13.0647	21.4822	3.57e-06	0.000103165	0.949142	13.1985	15.2162	9.59e-05	0.00117364
1:1:143455185	Hypo	1H	143455185	1	0.661967	5.84219	16.5372	4.77e-05	0.00115683	0.707812	5.89041	17.4061	3.02e-05	0.000556967	1.53774	6.50322	29.228	6.43e-08	4.04e-06
1:1:143746911	Hyper	1H	143746911	1	-1.22198	4.52885	33.6762	6.51e-09	1.28e-06	-0.86099	4.65986	15.4165	8.62e-05	0.00126655	-1.32114	4.8489	27.2444	1.79e-07	9.03e-06
1:2:143837347	Hypo	1H	143837347	2	1.09278	3.05561	18.7692	1.48e-05	0.000484437	1.39724	3.23403	26.3434	2.86e-07	1.32e-05	1.08801	3.22756	10.6421	0.00110542	0.00743478
1:2:144259831	Hypo	1H	144259831	2	0.840903	5.4144	18.0165	2.19e-05	0.000652195	1.04756	5.5611	27.6337	1.47e-07	7.64e-06	1.0367	5.6588	21.4433	3.64e-06	9.37e-05
1:1:144312002	Hypo	1H	144312002	1	1.08363	2.77918	11.6708	0.000634887	0.00774107	1.1229	2.84506	10.5015	0.00119278	0.00955785	1.35524	3.06632	11.5423	0.000680289	0.00518284
1:1:144512855	Hyper	1H	144512855	1	-0.616845	6.72169	26.1161	3.21e-07	2.64e-05	-0.705309	6.70494	19.3988	1.06e-05	0.000243983	-0.7842	6.95225	21.6267	3.31e-06	8.71e-05
1:1:144551563	Hypo	1H	144551563	1	0.792139	4.23835	19.237	1.15e-05	0.000404426	0.80401	4.265	14.1279	0.000170788	0.00218226	1.12287	4.5485	24.3737	7.93e-07	2.9e-05
1:1:144637902	Hypo	1H	144637902	1	0.673041	5.74391	17.843	2.4e-05	0.0006982	0.875655	5.88612	27.8192	1.33e-07	7.09e-06	1.2831	6.23744	32.9508	9.45e-09	9.05e-07
1:1:144734047	Hypo	1H	144734047	1	0.692379	8.53293	21.5764	3.4e-06	0.000160136	0.843469	8.65357	25.8067	3.77e-07	1.65e-05	0.784017	8.73781	14.6875	0.000126884	0.00145473
1:1:144798085	Hypo	1H	144798085	1	0.709569	5.02578	13.9654	0.00018621	0.00317133	0.719702	5.05264	15.9032	6.67e-05	0.001033	0.829161	5.24288	14.3999	0.000147806	0.00163042
1:2:144982624	Hypo	1H	144982624	2	0.660615	7.09175	19.5436	9.83e-06	0.000359243	0.744047	7.16247	18.9699	1.33e-05	0.000290595	0.904993	7.37713	22.3665	2.25e-06	6.5e-05
1:1:145006113	Hyper	1H	145006113	1	-1.07542	5.54033	28.558	9.09e-08	1e-05	-0.824243	5.62258	16.8305	4.09e-05	0.000706922	-1.31189	5.81654	25.9848	3.44e-07	1.51e-05
1:1:145195807	Hyper	1H	145195807	1	-0.962793	3.49933	12.956	0.000318904	0.0046998	-0.95085	3.55056	11.1692	0.000831682	0.00727345	-1.17916	3.78734	11.9646	0.000542222	0.00435728
1:1:145655920	Hyper	1H	145655920	1	-1.15656	3.71989	24.3764	7.92e-07	5.23e-05	-1.03069	3.78264	17.7454	2.53e-05	0.000483952	-1.36642	4.01783	19.7267	8.93e-06	0.000187931
1:1:145887200	Hypo	1H	145887200	1	1.37774	3.58638	32.3116	1.31e-08	2.2e-06	1.8267	3.87492	42.219	8.16e-11	1.64e-08	1.69832	3.87353	26.2599	2.98e-07	1.35e-05
1:1:146182258	Hypo	1H	146182258	1	0.53275	4.94336	12.3763	0.000434828	0.00589054	0.698045	5.05524	17.5848	2.75e-05	0.000518313	0.780712	5.23032	16.3777	5.19e-05	0.000739059
1:1:146538424	Hypo	1H	146538424	1	0.71588	4.91755	15.992	6.36e-05	0.0014465	1.02861	5.12239	33.1023	8.74e-09	7.33e-07	1.04375	5.23168	23.9089	1.01e-06	3.5e-05
1:1:146931488	Hypo	1H	146931488	1	0.968764	4.2034	18.1357	2.06e-05	0.000623295	1.13578	4.32112	22.5191	2.08e-06	6.67e-05	0.947008	4.33727	12.8445	0.000338481	0.00305084
1:1:147509459	Hypo	1H	147509459	1	1.1281	4.95806	35.7475	2.25e-09	5.7e-07	1.22002	5.03697	42.0363	8.96e-11	1.75e-08	1.08062	5.05149	23.1892	1.47e-06	4.69e-05
1:1:147589425	Hypo	1H	147589425	1	0.983567	3.48413	11.7096	0.000621782	0.00762736	1.17891	3.60825	20.8358	5e-06	0.000134642	1.06214	3.68459	9.96207	0.00159798	0.00984847
1:2:147589659	Hypo	1H	147589659	2	1.25781	3.32785	16.6249	4.55e-05	0.00111657	1.235	3.3548	21.227	4.08e-06	0.000114783	1.08789	3.40777	11.0776	0.00087376	0.006233
1:1:148431410	Hypo	1H	148431410	1	1.45373	2.60259	16.9276	3.88e-05	0.000998181	1.54995	2.69482	20.7709	5.18e-06	0.000138675	1.78825	2.88736	21.7096	3.17e-06	8.44e-05
1:1:148922910	Hypo	1H	148922910	1	1.46359	2.3702	13.1992	0.000280063	0.00427667	1.74621	2.54898	14.1282	0.000170761	0.00218216	1.55176	2.60208	12.4446	0.000419209	0.00358719
1:1:149087281	Hypo	1H	149087281	1	1.35952	2.77024	21.5512	3.45e-06	0.000161676	1.31496	2.80304	16.9226	3.89e-05	0.000680915	1.91625	3.1724	19.3439	1.09e-05	0.000219877
1:1:149200331	Hypo	1H	149200331	1	1.39203	2.2869	12.4657	0.000414482	0.00569067	1.50018	2.38582	12.3494	0.000441121	0.00451285	2.33157	2.75128	24.0609	9.33e-07	3.29e-05
1:1:149869603	Hyper	1H	149869603	1	-0.826066	5.06658	28.703	8.44e-08	9.5e-06	-0.694093	5.1342	16.2008	5.7e-05	0.000913095	-1.18351	5.29631	32.4765	1.21e-08	1.1e-06
1:1:150526259	Hypo	1H	150526259	1	1.23122	3.12292	11.786	0.000596772	0.0074103	1.23643	3.16975	14.5301	0.000137936	0.00184516	1.27371	3.30608	12.7709	0.000352058	0.0031445
1:1:151010590	Hypo	1H	151010590	1	1.0329	3.58596	22.1699	2.5e-06	0.000125901	1.09344	3.64519	20.3723	6.37e-06	0.000162783	1.04107	3.74226	13.7585	0.000207873	0.0021159
1:1:151024104	Hypo	1H	151024104	1	1.4994	4.76201	52.3369	4.68e-13	1.03e-09	1.73214	4.93574	74.36	6.51e-18	8.44e-14	1.5164	4.85994	35.8718	2.11e-09	2.82e-07
1:1:151543586	Hypo	1H	151543586	1	1.05463	3.28493	16.463	4.96e-05	0.00119108	1.46382	3.52287	32.9081	9.66e-09	7.96e-07	1.48672	3.63486	24.999	5.74e-07	2.24e-05
1:1:151829524	Hypo	1H	151829524	1	0.711255	4.89336	20.979	4.64e-06	0.000204009	0.640383	4.88059	15.6096	7.79e-05	0.00116524	0.831429	5.1129	17.4223	2.99e-05	0.000486478
1:1:151983197	Hyper	1H	151983197	1	-1.35306	2.90985	18.676	1.55e-05	0.000501514	-1.28803	2.99065	15.6517	7.61e-05	0.0011446	-1.55069	3.22669	15.8449	6.88e-05	0.000916647
1:1:152473733	Hypo	1H	152473733	1	1.0502	3.15879	14.8138	0.000118665	0.00227513	1.17365	3.24392	15.6837	7.49e-05	0.00112962	1.18975	3.35261	10.7675	0.001033	0.00706011
1:1:152495418	Hyper	1H	152495418	1	-0.808144	5.22174	15.9167	6.62e-05	0.00148922	-0.892882	5.20666	18.3633	1.83e-05	0.000373688	-1.38713	5.39767	29.6805	5.09e-08	3.38e-06
1:1:152618151	Hypo	1H	152618151	1	0.88744	5.29284	21.6807	3.22e-06	0.000153789	0.966929	5.36164	26.9589	2.08e-07	1.02e-05	1.04242	5.51572	22.5453	2.05e-06	6.07e-05
1:1:152780884	Hypo	1H	152780884	1	1.13578	3.65612	15.7855	7.09e-05	0.00157036	1.34742	3.79454	27.2196	1.82e-07	9.13e-06	1.61451	4.02814	28.4369	9.68e-08	5.62e-06
1:1:152940465	Hypo	1H	152940465	1	1.01397	3.79929	16.3522	5.26e-05	0.00124271	1.123	3.88047	22.4613	2.14e-06	6.83e-05	1.25473	4.07133	16.3036	5.4e-05	0.000759866
1:1:153248876	Hypo	1H	153248876	1	0.969263	5.78573	36.5822	1.46e-09	4.14e-07	0.868166	5.74144	29.5973	5.32e-08	3.32e-06	0.761242	5.80724	16.0291	6.24e-05	0.00085047
1:1:153347011	Hypo	1H	153347011	1	1.07238	3.54825	20.5297	5.87e-06	0.000244811	1.18678	3.64045	21.072	4.42e-06	0.000122328	1.21266	3.76693	16.5748	4.68e-05	0.000682126
1:1:153582616	Hypo	1H	153582616	1	0.732217	4.26895	12.2963	0.000453863	0.00607855	1.05234	4.47073	24.8371	6.24e-07	2.5e-05	1.17852	4.64428	27.9876	1.22e-07	6.76e-06
1:1:153586624	Hyper	1H	153586624	1	-0.999803	2.79164	11.1442	0.000842959	0.0094488	-1.21941	2.83113	15.5026	8.24e-05	0.00122105	-1.37207	3.0688	13.0915	0.000296638	0.00276692
1:1:153793869	Hypo	1H	153793869	1	1.21869	3.46046	17.8476	2.39e-05	0.000697353	1.41837	3.59099	26.6813	2.4e-07	1.15e-05	1.60066	3.78066	29.112	6.83e-08	4.24e-06
1:1:153950977	Hypo	1H	153950977	1	1.01052	3.40787	14.9645	0.000109555	0.00215176	1.07976	3.47614	15.9843	6.39e-05	0.000999082	1.20269	3.64926	15.5267	8.13e-05	0.00103629
1:1:154109385	Hypo	1H	154109385	1	0.956967	5.29022	30.5148	3.31e-08	4.48e-06	1.18452	5.4573	38.5773	5.26e-10	7.46e-08	1.16486	5.5408	29.33	6.1e-08	3.87e-06
1:1:154210102	Hypo	1H	154210102	1	1.40651	3.95681	32.9744	9.34e-09	1.68e-06	1.71378	4.16426	49.26	2.24e-12	9.21e-10	1.75138	4.26192	36.6907	1.38e-09	2.04e-07
1:1:154415417	Hypo	1H	154415417	1	1.03362	3.40298	17.3594	3.09e-05	0.000842676	1.56163	3.71614	32.4126	1.25e-08	9.83e-07	1.59241	3.82947	24.3052	8.22e-07	2.98e-05
1:1:154541940	Hypo	1H	154541940	1	1.46562	2.73083	13.0681	0.000300375	0.00450196	1.39884	2.77104	12.9695	0.0003166	0.0035125	1.60794	2.95535	12.9069	0.000327374	0.0029793
1:2:154554890	Hypo	1H	154554890	2	1.4505	2.58966	19.5708	9.69e-06	0.000355583	2.23336	2.96633	47.9823	4.3e-12	1.52e-09	2.13807	3.00885	31.4343	2.06e-08	1.69e-06
1:1:155063469	Hypo	1H	155063469	1	1.62367	2.88333	30.4299	3.46e-08	4.64e-06	1.80949	3.00822	37.9728	7.17e-10	9.52e-08	2.0261	3.19006	31.8701	1.65e-08	1.41e-06
1:1:155182290	Hypo	1H	155182290	1	1.28044	4.48143	36.6191	1.44e-09	4.07e-07	1.52795	4.65438	55.623	8.78e-14	7.88e-11	1.25447	4.59114	25.0089	5.71e-07	2.23e-05
1:1:155314229	Hypo	1H	155314229	1	1.29064	3.0393	17.0791	3.59e-05	0.000940707	1.44004	3.14752	21.8594	2.93e-06	8.8e-05	1.99213	3.51393	30.3352	3.63e-08	2.59e-06
1:1:155539661	Hyper	1H	155539661	1	-1.39984	2.30203	12.8116	0.000344478	0.00497206	-1.64846	2.36754	13.6417	0.000221221	0.00266633	-1.81136	2.61073	12.6823	0.000369128	0.00326068
1:1:155630461	Hypo	1H	155630461	1	1.44244	2.57566	15.2651	9.34e-05	0.00192373	1.615	2.69726	18.8845	1.39e-05	0.000300917	1.88923	2.90302	26.3116	2.91e-07	1.32e-05
1:1:155717604	Hypo	1H	155717604	1	0.896241	4.01409	21.0943	4.37e-06	0.000194684	1.2506	4.25486	29.0845	6.93e-08	4.13e-06	1.35613	4.411	30.7471	2.94e-08	2.22e-06
1:1:155903708	Hyper	1H	155903708	1	-1.21927	3.11445	14.5702	0.000135032	0.00250856	-1.25043	3.16719	14.4067	0.000147277	0.00194216	-1.21697	3.45486	11.2357	0.000802382	0.00585456
1:1:156096206	Hypo	1H	156096206	1	1.16329	2.82658	11.3459	0.000756139	0.00875079	1.22271	2.89809	14.4128	0.000146803	0.00193734	1.85199	3.26612	21.9671	2.77e-06	7.58e-05
1:1:157026329	Hyper	1H	157026329	1	-0.558346	8.13532	20.6053	5.64e-06	0.000237787	-0.586359	8.12772	18.9295	1.36e-05	0.000295455	-1.05176	8.26865	35.5975	2.43e-09	3.14e-07
1:1:157366603	Hypo	1H	157366603	1	1.12116	4.52828	40.9059	1.6e-10	7.86e-08	1.4938	4.78336	53.309	2.85e-13	1.82e-10	1.55138	4.89628	41.3252	1.29e-10	3.2e-08
1:1:157368377	Hypo	1H	157368377	1	0.997564	4.43582	25.0164	5.68e-07	4.06e-05	1.25675	4.60971	32.747	1.05e-08	8.51e-07	1.26026	4.70945	24.0353	9.46e-07	3.32e-05
1:1:157379415	Hypo	1H	157379415	1	1.31894	3.05061	21.5476	3.45e-06	0.000161855	1.59099	3.21775	36.6076	1.44e-09	1.7e-07	1.64126	3.33688	25.489	4.45e-07	1.85e-05
1:1:157499459	Hypo	1H	157499459	1	1.27822	3.02287	17.1935	3.38e-05	0.000897912	1.06928	2.98106	12.4785	0.000411663	0.00428208	1.22486	3.16784	13.649	0.00022036	0.00221378
1:1:158015026	Hypo	1H	158015026	1	1.39913	3.82023	32.4271	1.24e-08	2.12e-06	1.75373	4.05758	42.9771	5.54e-11	1.22e-08	1.71422	4.10254	38.2032	6.37e-10	1.1e-07
1:1:158112827	Hypo	1H	158112827	1	0.868349	4.46636	18.8814	1.39e-05	0.000465215	1.15192	4.65528	24.1181	9.06e-07	3.37e-05	0.903812	4.63655	11.4609	0.000710749	0.00535906
1:1:158473548	Hyper	1H	158473548	1	-1.06789	3.30075	16.4053	5.11e-05	0.00121708	-0.972272	3.36462	11.8378	0.000580412	0.00553624	-1.4713	3.56169	19.2061	1.17e-05	0.000233052
1:1:158525402	Hypo	1H	158525402	1	1.5536	2.65823	17.3653	3.08e-05	0.000841407	2.34324	3.04506	50.8819	9.81e-13	4.6e-10	2.42909	3.20514	27.6331	1.47e-07	7.71e-06
1:1:159249929	Hypo	1H	159249929	1	1.35765	3.05381	19.8124	8.54e-06	0.000324031	1.79409	3.3021	35.3309	2.78e-09	2.9e-07	1.8116	3.41366	23.1772	1.48e-06	4.72e-05
1:1:159454857	Hypo	1H	159454857	1	1.09606	3.10578	15.3842	8.77e-05	0.00184154	0.96286	3.09104	10.8117	0.00100859	0.00842882	1.26764	3.33937	15.2453	9.44e-05	0.00115972
1:1:159712044	Hypo	1H	159712044	1	1.10588	3.52217	15.6271	7.71e-05	0.00167791	1.61902	3.82793	40.7885	1.7e-10	2.91e-08	1.61027	3.90766	33.5467	6.96e-09	7.17e-07
1:1:161302194	Hypo	1H	161302194	1	1.61357	2.52783	16.7954	4.16e-05	0.00105051	1.45205	2.53049	13.7305	0.000211003	0.00257242	1.61678	2.71722	13.5525	0.000231986	0.00229992
1:1:161888928	Hypo	1H	161888928	1	1.4746	2.66956	20.7764	5.16e-06	0.000221617	1.52796	2.74969	17.6276	2.69e-05	0.000509233	1.95539	3.02961	26.4424	2.72e-07	1.25e-05
1:1:161960382	Hypo	1H	161960382	1	1.03921	3.70147	14.0399	0.000178972	0.00308467	1.06396	3.73076	19.4005	1.06e-05	0.00024392	1.06353	3.86491	12.5214	0.000402324	0.00347645
1:1:162206338	Hypo	1H	162206338	1	1.32953	3.35389	28.2086	1.09e-07	1.14e-05	1.28623	3.3601	21.7678	3.08e-06	9.15e-05	1.19712	3.4413	12.822	0.000342565	0.00307866
1:1:162406527	Hypo	1H	162406527	1	0.922897	3.70924	13.4651	0.000243048	0.00386253	1.01025	3.77625	18.5423	1.66e-05	0.000346259	1.23354	4.00712	20.4788	6.03e-06	0.000137729
1:1:162745047	Hypo	1H	162745047	1	0.85075	3.48228	12.5363	0.000399132	0.00553481	0.926294	3.55051	14.4938	0.000140621	0.00187109	0.959836	3.69568	11.473	0.000706147	0.00533047
1:1:163171257	Hypo	1H	163171257	1	1.17047	3.1928	13.1064	0.000294282	0.00443239	0.962479	3.1388	10.6968	0.0010732	0.00883515	1.19037	3.36696	11.6844	0.000630269	0.00489084
1:1:163274048	Hypo	1H	163274048	1	1.2168	2.46605	12.1323	0.000495558	0.0064774	1.52213	2.63749	14.9155	0.000112437	0.00156865	1.76879	2.83207	22.4579	2.15e-06	6.29e-05
1:1:163562614	Hypo	1H	163562614	1	1.50292	2.7725	18.7511	1.49e-05	0.000488137	1.66264	2.87486	26.5136	2.62e-07	1.23e-05	1.77862	3.05684	19.6612	9.25e-06	0.000192923
1:1:163641716	Hypo	1H	163641716	1	1.0051	2.93448	12.4555	0.000416763	0.00571013	1.35824	3.12187	22.1907	2.47e-06	7.66e-05	1.83414	3.43227	26.8419	2.21e-07	1.06e-05
1:1:163678619	Hypo	1H	163678619	1	1.46141	3.32137	26.3711	2.82e-07	2.37e-05	1.31664	3.28135	19.7368	8.89e-06	0.000212566	1.10277	3.30778	14.874	0.000114938	0.00134943
1:1:164354425	Hypo	1H	164354425	1	1.19109	4.07284	25.569	4.27e-07	3.29e-05	1.41207	4.22999	34.2876	4.75e-09	4.46e-07	1.29231	4.24501	20.8098	5.07e-06	0.000120881
1:1:164470436	Hypo	1H	164470436	1	1.6716	2.89185	22.6537	1.94e-06	0.000103434	2.03655	3.10287	43.7534	3.72e-11	8.71e-09	2.1971	3.26736	24.9364	5.93e-07	2.3e-05
1:1:164564920	Hypo	1H	164564920	1	1.18429	2.8253	11.2958	0.000776815	0.00892198	1.53238	3.01986	19.7401	8.87e-06	0.000212282	1.90981	3.29014	24.049	9.39e-07	3.3e-05
1:1:165667414	Hypo	1H	165667414	1	0.787512	3.56799	11.6292	0.000649257	0.00786633	1.07899	3.74689	26.7693	2.29e-07	1.1e-05	0.90883	3.79451	12.0048	0.000530625	0.00428269
1:1:165924564	Hypo	1H	165924564	1	1.07039	2.81854	13.2078	0.000278779	0.00426198	1.15197	2.89055	13.0977	0.000295663	0.00333059	1.70001	3.2327	22.3426	2.28e-06	6.55e-05
1:1:166017289	Hypo	1H	166017289	1	1.41201	2.88174	20.4263	6.2e-06	0.000253298	1.42187	2.92705	20.1946	7e-06	0.000175279	1.48681	3.07222	15.523	8.15e-05	0.00103753
1:1:166196156	Hypo	1H	166196156	1	0.614437	4.64798	13.4073	0.000250643	0.00395367	0.708303	4.71769	16.096	6.02e-05	0.000954683	0.858111	4.92628	17.5909	2.74e-05	0.000453307
1:1:166267317	Hypo	1H	166267317	1	0.87639	4.85806	22.7307	1.86e-06	0.0001	1.01338	4.96118	28.3911	9.91e-08	5.57e-06	1.00499	5.07137	20.8799	4.89e-06	0.000117473
1:1:167687617	Hypo	1H	167687617	1	1.72419	2.63839	21.9227	2.84e-06	0.000139256	1.81555	2.7272	21.1272	4.3e-06	0.000119505	1.61144	2.77268	13.6752	0.00021731	0.00218918
1:1:167942279	Hypo	1H	167942279	1	0.57441	6.04768	12.4771	0.000411982	0.00566327	0.961431	6.30746	29.0012	7.23e-08	4.29e-06	0.736329	6.29193	14.0902	0.000174249	0.00184974
1:1:167942323	Hypo	1H	167942323	1	0.659765	5.69956	13.2501	0.000272572	0.00419781	0.779262	5.79177	16.3811	5.18e-05	0.000849006	0.74608	5.89944	12.2074	0.00047601	0.00394268
1:1:168052213	Hypo	1H	168052213	1	0.708529	3.67762	11.1124	0.000857535	0.00956538	1.0075	3.85994	20.0239	7.65e-06	0.000188607	0.83127	3.91726	11.3084	0.000771552	0.00568295
1:1:168052228	Hypo	1H	168052228	1	1.60466	2.89465	29.2121	6.49e-08	7.7e-06	1.69206	2.96481	32.937	9.52e-09	7.86e-07	1.74504	3.10329	22.7554	1.84e-06	5.58e-05
1:1:168456491	Hypo	1H	168456491	1	1.05703	3.33783	14.5236	0.000138412	0.00255777	1.16334	3.42358	16.5384	4.77e-05	0.000795709	1.28717	3.59894	17.7221	2.56e-05	0.000428374
1:1:168733093	Hyper	1H	168733093	1	-1.06171	4.90388	29.4763	5.66e-08	6.94e-06	-1.06052	4.9497	23.9708	9.78e-07	3.59e-05	-1.41349	5.15763	30.2428	3.81e-08	2.68e-06
1:1:169068028	Hypo	1H	169068028	1	1.09938	2.92135	12.2951	0.000454148	0.00608168	1.59323	3.18058	28.528	9.24e-08	5.26e-06	1.56168	3.28704	18.503	1.7e-05	0.000311539
1:1:169131242	Hypo	1H	169131242	1	1.35932	3.38837	19.0312	1.29e-05	0.000437709	1.68716	3.60317	28.909	7.59e-08	4.46e-06	1.86013	3.7702	30.607	3.16e-08	2.35e-06
1:1:169370527	Hyper	1H	169370527	1	-0.94384	4.09256	21.8554	2.94e-06	0.000143107	-0.858416	4.15878	16.5495	4.74e-05	0.000792869	-1.20761	4.36928	22.3148	2.31e-06	6.62e-05
1:1:169961328	Hypo	1H	169961328	1	0.931531	6.82435	28.5729	9.02e-08	9.97e-06	0.92069	6.84179	24.0344	9.46e-07	3.5e-05	0.936559	6.96231	15.8985	6.68e-05	0.000896861
1:1:170038420	Hypo	1H	170038420	1	0.870276	4.83308	25.729	3.93e-07	3.08e-05	0.83499	4.82379	15.768	7.16e-05	0.00109322	0.790158	4.92737	11.9092	0.000558588	0.00445903
1:1:170083578	Hypo	1H	170083578	1	1.57874	2.78352	14.7338	0.00012381	0.00235131	1.64744	2.85563	17.6234	2.69e-05	0.000510186	2.11963	3.15901	25.7323	3.92e-07	1.67e-05
1:1:170725731	Hyper	1H	170725731	1	-1.70628	3.47298	47.8133	4.69e-12	5.94e-09	-1.50436	3.57609	38.8623	4.55e-10	6.6e-08	-1.5508	3.87176	28.3351	1.02e-07	5.87e-06
1:1:170735870	Hyper	1H	170735870	1	-0.704689	5.31311	17.9473	2.27e-05	0.00066896	-0.82002	5.29509	20.2501	6.8e-06	0.000171305	-0.886089	5.55784	18.1671	2.02e-05	0.00035739
1:1:170742835	Hypo	1H	170742835	1	1.74157	3.03276	32.1339	1.44e-08	2.35e-06	1.76391	3.07494	33.6671	6.54e-09	5.77e-07	1.80901	3.21729	22.9846	1.63e-06	5.08e-05
1:1:170783153	Hypo	1H	170783153	1	0.796464	7.92072	19.6104	9.49e-06	0.000349892	0.741583	7.91538	13.7914	0.000204267	0.00250759	0.789946	8.06122	11.8363	0.000580871	0.00459751
1:1:171674086	Hypo	1H	171674086	1	0.994116	3.52584	15.7581	7.2e-05	0.00158884	0.951977	3.5401	14.4029	0.000147573	0.00194538	1.17208	3.75955	18.0104	2.2e-05	0.000380885
1:1:172632046	Hypo	1H	172632046	1	1.23128	2.88982	15.0014	0.000107434	0.00212386	1.3595	2.99052	17.7754	2.49e-05	0.000477453	1.79982	3.31713	15.6609	7.58e-05	0.000985255
1:1:172685840	Hyper	1H	172685840	1	-1.57152	2.83677	16.428	5.05e-05	0.00120777	-1.41003	2.92559	14.0494	0.00017807	0.00225555	-1.86838	3.17065	15.1651	9.85e-05	0.00119902
1:1:173808620	Hyper	1H	173808620	1	-0.849057	3.34461	15.3817	8.78e-05	0.00184283	-1.06942	3.34378	21.3103	3.91e-06	0.000110784	-0.957628	3.63313	11.6299	0.000648993	0.00499998
1:1:173855372	Hypo	1H	173855372	1	1.02956	3.20344	13.9086	0.000191922	0.00324631	0.969211	3.20909	10.4175	0.00124829	0.00990383	1.22953	3.44572	16.5957	4.63e-05	0.000676866
1:1:176342861	Hypo	1H	176342861	1	0.870449	3.66349	12.16	0.000488244	0.00640641	0.85537	3.68829	12.4056	0.000428059	0.00440899	0.911084	3.84501	10.3132	0.00132079	0.00852162
1:1:178445389	Hyper	1H	178445389	1	-1.18524	2.8187	15.1929	9.71e-05	0.00197593	-1.12414	2.90085	12.7472	0.000356551	0.00384584	-2.18413	3.06472	24.758	6.5e-07	2.47e-05
1:1:178564979	Hypo	1H	178564979	1	1.0302	3.36111	15.504	8.23e-05	0.00175612	1.42545	3.59241	28.3217	1.03e-07	5.73e-06	1.36792	3.67739	19.0121	1.3e-05	0.000252703
1:1:178629058	Hypo	1H	178629058	1	1.05957	4.36024	23.6429	1.16e-06	7e-05	1.25614	4.4962	34.4095	4.47e-09	4.25e-07	1.13218	4.53086	21.0196	4.55e-06	0.000111163
1:1:178680474	Hypo	1H	178680474	1	1.5093	2.87117	23.3402	1.36e-06	7.84e-05	1.74402	3.01705	32.2211	1.38e-08	1.07e-06	1.90066	3.21051	22.6391	1.95e-06	5.85e-05
1:1:178767659	Hypo	1H	178767659	1	1.38674	2.77608	18.5114	1.69e-05	0.000536093	1.64899	2.93161	22.6365	1.96e-06	6.36e-05	1.28484	2.91508	11.5099	0.000692253	0.0052521
1:1:179083267	Hypo	1H	179083267	1	1.58624	2.96281	24.7698	6.46e-07	4.49e-05	1.51214	2.96825	22.5628	2.03e-06	6.55e-05	1.56018	3.09968	19.0464	1.28e-05	0.000248941
1:1:179611703	Hypo	1H	179611703	1	1.63976	2.571	15.9941	6.35e-05	0.00144554	1.73531	2.67029	19.4637	1.03e-05	0.000237771	2.37311	3.02111	36.356	1.64e-09	2.36e-07
1:1:179629959	Hypo	1H	179629959	1	1.11139	4.18706	30.3479	3.61e-08	4.79e-06	1.06823	4.18799	21.7513	3.1e-06	9.22e-05	1.11235	4.32208	21.2946	3.94e-06	9.94e-05
1:1:179767943	Hypo	1H	179767943	1	1.23425	4.17857	30.9112	2.7e-08	3.81e-06	1.64538	4.45382	53.4779	2.62e-13	1.69e-10	1.69067	4.55613	36.7296	1.36e-09	2.01e-07
1:1:179857006	Hypo	1H	179857006	1	1.73678	2.5482	16.6485	4.5e-05	0.00110862	2.09016	2.73962	37.1004	1.12e-09	1.35e-07	2.43526	2.98101	21.8665	2.92e-06	7.9e-05
1:1:180013689	Hypo	1H	180013689	1	1.02589	3.82066	18.0032	2.21e-05	0.000655791	0.927227	3.79862	13.5072	0.000237653	0.00281708	1.13154	4.02466	15.8361	6.91e-05	0.000919522
1:1:180270208	Hyper	1H	180270208	1	-1.12043	3.31483	17.9349	2.29e-05	0.000672199	-0.95906	3.40281	12.8084	0.00034506	0.00375189	-1.23294	3.62095	13.9921	0.000183582	0.00192542
1:1:180641109	Hypo	1H	180641109	1	1.09191	2.93492	13.4758	0.000241665	0.00384567	1.11843	2.98554	14.3983	0.000147935	0.00194919	1.64152	3.31831	17.8367	2.41e-05	0.000409582
1:1:180993266	Hyper	1H	180993266	1	-1.06303	6.34967	55.0872	1.15e-13	3.27e-10	-0.598263	6.52258	15.5443	8.06e-05	0.00119864	-0.98233	6.69244	30.3593	3.59e-08	2.57e-06
1:1:181255336	Hypo	1H	181255336	1	0.73523	5.28342	21.1463	4.26e-06	0.000190682	0.824073	5.35085	21.4408	3.65e-06	0.000104822	0.874989	5.49915	20.3206	6.55e-06	0.000147032
1:1:184860355	Hypo	1H	184860355	1	0.781225	6.75809	15.8495	6.86e-05	0.00153033	0.958383	6.89282	25.5867	4.23e-07	1.82e-05	1.05407	7.06185	15.9131	6.63e-05	0.000891794
1:1:187057567	Hypo	1H	187057567	1	1.32067	3.45018	26.3859	2.8e-07	2.36e-05	1.39815	3.5214	26.4256	2.74e-07	1.28e-05	1.19219	3.53714	12.7305	0.00035974	0.00319538
1:1:187506713	Hypo	1H	187506713	1	0.731854	4.58147	18.8401	1.42e-05	0.000472169	0.731563	4.58751	15.0961	0.000102176	0.00145242	0.796572	4.75666	14.5952	0.000133252	0.00151159
1:1:187950185	Hypo	1H	187950185	1	1.56821	2.63569	21.2045	4.13e-06	0.000186166	1.56545	2.68797	21.1877	4.16e-06	0.000116629	1.49904	2.80482	12.8269	0.000341664	0.00307246
1:1:188744197	Hyper	1H	188744197	1	-1.10249	3.24277	19.8971	8.17e-06	0.000313675	-1.2128	3.28443	21.6069	3.35e-06	9.8e-05	-1.08644	3.57379	12.7217	0.000361442	0.00320628
1:1:194693188	Hyper	1H	194693188	1	-0.611437	4.71695	11.6049	0.00065777	0.00793475	-0.685533	4.70683	12.37	0.000436278	0.00447586	-1.31995	4.84442	30.1131	4.08e-08	2.83e-06
1:1:207482787	Hypo	1H	207482787	1	0.747785	5.49212	20.142	7.19e-06	0.000284703	0.822803	5.55393	19.8643	8.31e-06	0.000201704	0.956052	5.74701	22.0978	2.59e-06	7.22e-05
1:1:208406719	Hyper	1H	208406719	1	-0.483379	6.7218	14.622	0.000131369	0.00246085	-0.6561	6.66264	19.0492	1.27e-05	0.000281014	-0.794809	6.89481	18.6815	1.54e-05	0.000289904
1:2:208407288	Hypo	1H	208407288	2	0.478302	6.60112	11.5665	0.0006715	0.00804577	0.685007	6.73912	18.989	1.31e-05	0.000288243	1.64313	7.47029	27.5984	1.49e-07	7.81e-06
1:1:210968695	Hypo	1H	210968695	1	1.29077	4.19119	34.1142	5.2e-09	1.08e-06	1.65671	4.44022	51.3105	7.89e-13	3.96e-10	1.53693	4.44741	33.9563	5.64e-09	6.06e-07
1:1:211199057	Hypo	1H	211199057	1	1.29478	3.40544	20.2363	6.84e-06	0.000274283	1.51429	3.54941	30.8295	2.82e-08	1.97e-06	1.62928	3.69867	26.8983	2.14e-07	1.04e-05
1:1:211655295	Hypo	1H	211655295	1	1.09082	3.52963	19.9171	8.09e-06	0.000311716	1.30718	3.67905	22.6699	1.92e-06	6.26e-05	1.0489	3.66995	11.6545	0.000640473	0.00495018
1:2:219633462	Hyper	1H	219633462	2	-0.755324	3.77067	15.1875	9.73e-05	0.00197958	-0.910149	3.758	18.6243	1.59e-05	0.000335512	-1.12859	3.98104	18.7862	1.46e-05	0.000277733
1:1:225903204	Hyper	1H	225903204	1	-0.843689	3.015	11.383	0.000741196	0.00861807	-0.931441	3.04585	10.8913	0.000966145	0.00815352	-1.09448	3.27386	11.7956	0.0005937	0.00467008
1:1:225911267	Hypo	1H	225911267	1	1.32157	3.92292	28.6624	8.62e-08	9.61e-06	1.48678	4.04858	33.053	8.97e-09	7.48e-07	1.35791	4.06641	23.7371	1.1e-06	3.76e-05
1:1:232761822	Hypo	1H	232761822	1	0.948029	3.20316	11.3235	0.000765328	0.0088331	1.01402	3.26906	12.7183	0.00036209	0.00389063	1.28132	3.51185	17.2426	3.29e-05	0.000523349
1:1:233093301	Hypo	1H	233093301	1	1.17673	4.59682	29.1652	6.65e-08	7.83e-06	1.39944	4.75031	44.993	1.98e-11	5.19e-09	1.71644	5.03434	47.3915	5.81e-12	2.86e-09
1:1:242228975	Hypo	1H	242228975	1	1.1209	5.21836	41.4687	1.2e-10	6.31e-08	1.43643	5.44612	65.9347	4.66e-16	1.29e-12	1.31378	5.4485	48.9834	2.58e-12	1.49e-09
1:1:242286717	Hypo	1H	242286717	1	1.33622	4.08996	31.151	2.39e-08	3.47e-06	1.62802	4.29659	43.9003	3.46e-11	8.28e-09	1.60453	4.35306	30.3774	3.56e-08	2.56e-06
1:1:242377853	Hypo	1H	242377853	1	1.11794	3.35401	18.5421	1.66e-05	0.000529746	1.33972	3.48992	18.5128	1.69e-05	0.000350282	1.89811	3.87619	39.1374	3.95e-10	7.66e-08
1:1:242461395	Hypo	1H	242461395	1	0.709046	4.09871	11.9917	0.000534393	0.00684155	0.768222	4.15811	11.0012	0.000910509	0.00779739	0.842279	4.32663	10.8118	0.00100856	0.00693523
1:1:242907651	Hypo	1H	242907651	1	1.02373	3.02896	11.8136	0.000588005	0.00733085	1.43638	3.25415	23.8284	1.05e-06	3.8e-05	1.14532	3.25063	12.667	0.000372175	0.00328025
1:1:243117054	Hypo	1H	243117054	1	1.43809	3.15652	23.1906	1.47e-06	8.28e-05	1.4437	3.19417	24.3105	8.2e-07	3.11e-05	1.48534	3.32117	19.0369	1.28e-05	0.00024993
1:1:243173147	Hypo	1H	243173147	1	1.24157	2.8799	20.1738	7.07e-06	0.000281216	1.20545	2.91871	15.8299	6.93e-05	0.00106516	1.34478	3.09533	14.9805	0.000108628	0.00129412
1:1:243297713	Hypo	1H	243297713	1	0.955174	4.52959	23.7756	1.08e-06	6.66e-05	0.809191	4.4711	11.9938	0.000533766	0.00520605	1.42737	4.91425	40.8759	1.62e-10	3.83e-08
1:1:243523171	Hyper	1H	243523171	1	-1.03752	3.54513	13.3479	0.000258714	0.00404136	-1.03145	3.59175	13.1884	0.000281687	0.0032138	-1.16294	3.85036	12.2308	0.000470081	0.00390701
1:1:243745204	Hyper	1H	243745204	1	-0.83364	4.10852	14.5186	0.000138779	0.00256297	-1.23493	4.04392	29.366	5.99e-08	3.67e-06	-1.41875	4.30708	24.8378	6.24e-07	2.4e-05
1:1:243749526	Hyper	1H	243749526	1	-1.56223	4.99982	56.3466	6.08e-14	2.26e-10	-1.20005	5.11525	28.4296	9.72e-08	5.49e-06	-1.58732	5.36201	41.9866	9.19e-11	2.47e-08
1:1:244485605	Hypo	1H	244485605	1	1.4416	2.52037	17.2016	3.36e-05	0.000896353	1.56616	2.61807	21.5717	3.41e-06	9.95e-05	1.56507	2.75964	15.3858	8.76e-05	0.00109618
1:1:248307364	Hypo	1H	248307364	1	1.25326	2.74936	15.7125	7.37e-05	0.00161976	1.60994	2.94086	17.8153	2.43e-05	0.00046986	1.5469	3.02732	12.6789	0.000369806	0.00326462
1:1:249888717	Hypo	1H	249888717	1	0.911593	4.06775	16.9268	3.88e-05	0.000998381	1.28685	4.29993	40.0189	2.52e-10	3.99e-08	1.26065	4.38816	27.7918	1.35e-07	7.26e-06
1:1:251988054	Hypo	1H	251988054	1	1.23869	3.2631	17.7776	2.48e-05	0.000718051	1.2083	3.28468	16.1556	5.83e-05	0.000931672	1.5079	3.53668	22.5292	2.07e-06	6.1e-05
1:1:262719546	Hypo	1H	262719546	1	0.589424	6.4445	14.9902	0.00010807	0.00213174	0.6704	6.51252	15.2269	9.53e-05	0.00137461	0.769186	6.7005	12.9574	0.000318657	0.0029207
1:1:270045927	Hypo	1H	270045927	1	0.706622	5.54687	19.5707	9.69e-06	0.000355583	0.979777	5.73533	35.2626	2.88e-09	3e-07	1.12289	5.92172	35.815	2.17e-09	2.88e-07
1:1:270201986	Hypo	1H	270201986	1	1.32431	2.8997	19.1486	1.21e-05	0.000417774	1.43834	2.99193	22.7876	1.81e-06	5.97e-05	1.53887	3.14223	15.9563	6.48e-05	0.000875704
1:1:271434012	Hyper	1H	271434012	1	-0.563084	4.78486	14.3914	0.000148476	0.00268949	-0.590848	4.79699	14.1503	0.000168768	0.00216286	-0.883001	4.98575	18.6378	1.58e-05	0.000294855
1:1:271434029	Hyper	1H	271434029	1	-0.817809	3.5447	14.6491	0.000129494	0.00243449	-0.722171	3.61951	10.816	0.00100628	0.00841418	-0.945615	3.83994	12.668	0.000371963	0.00327897
1:1:271868028	Hypo	1H	271868028	1	1.434	3.352	26.7144	2.36e-07	2.08e-05	1.61153	3.47166	35.128	3.09e-09	3.18e-07	1.85879	3.68396	34.9881	3.32e-09	4.05e-07
1:1:271923744	Hypo	1H	271923744	1	0.935929	4.68857	27.7545	1.38e-07	1.37e-05	1.06397	4.78251	31.0165	2.56e-08	1.83e-06	0.940607	4.82868	16.8333	4.08e-05	0.0006159
1:1:272157912	Hyper	1H	272157912	1	-1.26382	7.58081	38.0313	6.96e-10	2.34e-07	-0.973178	7.66306	21.3577	3.81e-06	0.000108631	-2.0876	7.77805	50.5612	1.16e-12	7.76e-10
1:1:273121455	Hypo	1H	273121455	1	0.926425	5.06179	27.9689	1.23e-07	1.26e-05	1.07609	5.17223	40.6205	1.85e-10	3.1e-08	0.672208	5.07269	10.2254	0.00138519	0.00883546
1:1:275186388	Hypo	1H	275186388	1	0.823085	5.10321	20.5579	5.79e-06	0.000242549	1.13208	5.31533	39.7725	2.85e-10	4.44e-08	1.07834	5.38142	24.6409	6.91e-07	2.6e-05
1:1:275543809	Hypo	1H	275543809	1	0.950294	4.08015	18.2125	1.98e-05	0.000604153	1.00427	4.13315	15.8138	6.99e-05	0.00107283	1.38544	4.43999	24.4784	7.51e-07	2.77e-05
1:1:275738093	Hypo	1H	275738093	1	1.37507	2.30004	12.6167	0.000382312	0.00536404	1.34111	2.36568	11.8967	0.000562337	0.00541257	2.09896	2.73064	18.7583	1.48e-05	0.000280755
1:1:276535318	Hypo	1H	276535318	1	1.26655	3.38971	22.2502	2.39e-06	0.000122197	1.01989	3.31	10.9679	0.000927033	0.00790638	1.28047	3.54243	14.6237	0.000131254	0.00149597
1:1:276560266	Hypo	1H	276560266	1	1.36308	3.68139	30.7196	2.98e-08	4.14e-06	1.25956	3.64861	20.4305	6.18e-06	0.000158811	1.12722	3.70082	14.4799	0.000141666	0.0015798
1:1:276566293	Hypo	1H	276566293	1	1.26661	3.17649	13.7779	0.000205741	0.00341362	1.47361	3.30133	25.5815	4.24e-07	1.82e-05	1.86354	3.59432	27.2053	1.83e-07	9.19e-06
1:1:278588571	Hyper	1H	278588571	1	-0.731903	4.47027	17.0866	3.57e-05	0.000938031	-0.730446	4.49238	17.8166	2.43e-05	0.000469764	-0.839108	4.7452	14.8132	0.000118701	0.00138439
1:1:278849780	Hypo	1H	278849780	1	1.49139	3.41554	27.8262	1.33e-07	1.34e-05	1.71285	3.56417	39.486	3.3e-10	5.02e-08	2.24772	3.93332	61.8974	3.62e-15	1.06e-11
1:1:279163439	Hyper	1H	279163439	1	-0.816066	3.69248	17.9378	2.28e-05	0.000671322	-1.02838	3.67143	24.4993	7.43e-07	2.87e-05	-1.22409	3.91961	22.9802	1.64e-06	5.09e-05
1:1:280956918	Hypo	1H	280956918	1	1.09132	2.71169	12.3971	0.000429995	0.00584302	1.8598	3.08071	38.0512	6.89e-10	9.22e-08	1.38897	2.99434	14.4684	0.000142529	0.00158655
1:1:282986153	Hyper	1H	282986153	1	-1.17658	3.88258	23.8167	1.06e-06	6.57e-05	-0.947035	3.97806	14.3001	0.000155857	0.0020286	-1.52832	4.15921	23.0037	1.62e-06	5.05e-05
1:1:284395314	Hypo	1H	284395314	1	1.06603	2.91825	13.0862	0.000297484	0.00446932	1.32088	3.07	18.8113	1.44e-05	0.000309785	1.5984	3.30807	19.153	1.21e-05	0.000238616
1:1:284426797	Hypo	1H	284426797	1	1.15556	4.97498	38.1575	6.53e-10	2.23e-07	1.21605	5.0332	34.8563	3.55e-09	3.56e-07	1.0187	5.02249	19.5102	1e-05	0.00020519
1:1:284442792	Hypo	1H	284442792	1	1.41667	2.65527	11.2314	0.000804253	0.00914844	2.25919	3.07285	33.3818	7.57e-09	6.54e-07	2.24803	3.17806	22.355	2.27e-06	6.52e-05
1:1:284478599	Hypo	1H	284478599	1	1.33093	2.78722	15.4672	8.39e-05	0.00178389	1.61299	2.95093	20.3079	6.59e-06	0.000167212	1.97754	3.21504	24.9951	5.75e-07	2.24e-05
1:1:284533410	Hypo	1H	284533410	1	1.48206	2.6135	16.651	4.49e-05	0.0011085	1.48397	2.67068	17.9568	2.26e-05	0.000442947	1.98309	2.96685	23.9659	9.81e-07	3.42e-05
1:1:284597893	Hypo	1H	284597893	1	1.38715	3.45917	25.5308	4.35e-07	3.34e-05	1.84148	3.7304	50.7019	1.08e-12	4.98e-10	1.97982	3.89536	43.6178	3.99e-11	1.29e-08
1:1:284691373	Hypo	1H	284691373	1	1.01971	3.35557	14.4291	0.000145533	0.00265239	1.39363	3.58724	22.6502	1.94e-06	6.32e-05	1.65361	3.80983	30.2587	3.78e-08	2.67e-06
1:1:284804613	Hypo	1H	284804613	1	1.15427	3.39338	14.8374	0.000117187	0.00225552	1.24076	3.46374	18.8858	1.39e-05	0.0003009	1.39068	3.6458	15.2806	9.27e-05	0.00114396
1:1:285134506	Hypo	1H	285134506	1	1.55346	2.61479	18.7714	1.47e-05	0.000484017	1.53042	2.66926	15.1622	9.87e-05	0.00141329	1.76509	2.89368	14.313	0.000154793	0.00169029
1:2:285241249	Hypo	1H	285241249	2	1.27806	2.63925	13.6875	0.000215892	0.00353975	1.56713	2.80442	16.0836	6.06e-05	0.000959745	1.56869	2.92088	15.0001	0.000107506	0.0012837
1:1:285325352	Hypo	1H	285325352	1	1.31795	3.78446	20.2277	6.87e-06	0.000275235	1.43145	3.87184	29.5094	5.56e-08	3.45e-06	1.77459	4.15127	32.2294	1.37e-08	1.22e-06
1:1:285402234	Hypo	1H	285402234	1	0.978104	5.59289	31.6534	1.84e-08	2.84e-06	0.882735	5.54991	20.4298	6.19e-06	0.000158823	0.978517	5.72045	22.0602	2.64e-06	7.33e-05
1:1:286559367	Hypo	1H	286559367	1	1.21	4.06853	37.3402	9.92e-10	3.06e-07	1.54076	4.29074	42.7915	6.09e-11	1.31e-08	1.27487	4.23648	21.5251	3.49e-06	9.08e-05
1:1:286622936	Hypo	1H	286622936	1	0.864497	4.4079	20.5192	5.9e-06	0.000245771	0.780747	4.38111	16.0788	6.08e-05	0.000961286	0.925021	4.5848	15.2491	9.42e-05	0.00115813
1:1:292055705	Hyper	1H	292055705	1	-1.60844	5.6055	29.5816	5.36e-08	6.67e-06	-0.975361	5.77594	11.0555	0.000884241	0.00762973	-2.46885	5.86328	37.7158	8.18e-10	1.33e-07
1:1:292133607	Hypo	1H	292133607	1	0.984183	4.74526	26.1806	3.11e-07	2.57e-05	1.02144	4.79202	20.9923	4.61e-06	0.000126446	1.1095	4.9544	20.9973	4.6e-06	0.000112049
1:1:292133631	Hypo	1H	292133631	1	0.74938	4.65591	12.4315	0.00042216	0.00576352	0.964818	4.80315	18.8179	1.44e-05	0.000308991	0.915194	4.89832	12.5187	0.000402909	0.00348059
1:1:293475257	Hypo	1H	293475257	1	1.74518	2.56836	25.3563	4.77e-07	3.57e-05	1.78903	2.63707	24.3732	7.94e-07	3.03e-05	2.2462	2.9351	20.4972	5.97e-06	0.000136779
1:1:293480825	Hypo	1H	293480825	1	0.886161	4.31083	17.9658	2.25e-05	0.000665121	1.35038	4.60787	43.1758	5e-11	1.12e-08	1.21139	4.62383	26.193	3.09e-07	1.39e-05
1:1:293490362	Hypo	1H	293490362	1	1.1201	4.71837	30.1153	4.07e-08	5.28e-06	1.47145	4.96409	49.1861	2.33e-12	9.4e-10	1.59201	5.10942	45.2902	1.7e-11	6.58e-09
1:1:295869908	Hypo	1H	295869908	1	1.79267	3.20489	14.7529	0.000122556	0.00233358	1.74393	3.1908	15.5906	7.86e-05	0.00117402	2.32908	3.59146	32.8224	1.01e-08	9.55e-07
1:1:296091575	Hypo	1H	296091575	1	1.56138	2.87534	11.1908	0.000822029	0.00928149	1.52877	2.93528	17.524	2.84e-05	0.00053159	1.91747	3.20941	30.4734	3.38e-08	2.48e-06
1:1:296613987	Hypo	1H	296613987	1	1.13478	4.69812	25.1044	5.43e-07	3.92e-05	1.14515	4.72516	29.3422	6.07e-08	3.7e-06	0.846573	4.67594	12.0267	0.000524451	0.00424558
1:1:296942850	Hypo	1H	296942850	1	0.682609	4.27781	11.8446	0.000578291	0.00724845	1.17327	4.58086	34.3491	4.61e-09	4.36e-07	1.24858	4.71535	33.4411	7.35e-09	7.47e-07
1:1:297090087	Hypo	1H	297090087	1	1.6156	2.61667	18.3779	1.81e-05	0.000567284	2.04122	2.83522	34.5066	4.25e-09	4.1e-07	1.58962	2.79423	11.6566	0.000639743	0.00494619
1:1:298876171	Hypo	1H	298876171	1	0.84928	5.51408	35.7435	2.25e-09	5.7e-07	0.884686	5.54828	28.6308	8.76e-08	5.03e-06	1.00206	5.73091	33.0686	8.9e-09	8.58e-07
1:1:305441267	Hypo	1H	305441267	1	0.719127	5.10538	21.3885	3.75e-06	0.000172529	0.752124	5.14137	17.2206	3.33e-05	0.000602623	0.748219	5.27244	13.187	0.000281894	0.00266006
1:1:305507340	Hypo	1H	305507340	1	0.81042	4.15946	13.8377	0.000199296	0.0033355	0.883525	4.22449	12.4936	0.000408357	0.00425263	0.963124	4.38762	15.3456	8.95e-05	0.00111392
1:1:305552373	Hypo	1H	305552373	1	1.43173	2.68501	18.6774	1.55e-05	0.000501273	1.465	2.7484	18.1874	2e-05	0.000402005	1.75191	2.9665	17.6215	2.7e-05	0.000447975
1:1:305687078	Hypo	1H	305687078	1	1.52195	4.51069	53.2677	2.91e-13	6.93e-10	1.67386	4.62983	59.3079	1.35e-14	1.83e-11	1.69839	4.71239	44.7722	2.21e-11	8.03e-09
1:1:305922689	Hyper	1H	305922689	1	-1.17052	2.72007	11.071	0.000876888	0.0097157	-1.04889	2.81085	10.5835	0.00114102	0.00924768	-1.52151	3.00095	12.6115	0.00038339	0.00335128
1:1:305930316	Hypo	1H	305930316	1	0.903292	3.89369	13.4973	0.000238908	0.00381353	1.14792	4.05982	20.3134	6.57e-06	0.000166847	1.14965	4.17324	14.1795	0.000166171	0.00178085
1:2:306510336	Hypo	1H	306510336	2	0.748504	4.26935	14.0447	0.000178518	0.00307967	0.976571	4.41912	21.103	4.35e-06	0.000120854	0.782838	4.45165	9.96872	0.00159222	0.0098234
1:1:309004346	Hypo	1H	309004346	1	0.901874	5.11145	25.6025	4.19e-07	3.24e-05	0.808936	5.07645	18.6033	1.61e-05	0.000338315	0.779071	5.19628	12.9997	0.000311544	0.00287311
1:1:309578752	Hypo	1H	309578752	1	0.862387	3.5039	14.4193	0.000146294	0.00266144	0.979341	3.58468	14.3507	0.000151719	0.00198668	1.03597	3.73597	13.3121	0.000263702	0.00252817
1:1:309607208	Hypo	1H	309607208	1	1.15288	4.46181	14.7518	0.00012263	0.00233425	1.40369	4.64228	28.0469	1.18e-07	6.43e-06	1.11165	4.5764	13.473	0.000242026	0.00237135
1:1:309946103	Hypo	1H	309946103	1	0.732305	5.15201	16.4268	5.06e-05	0.00120802	0.836041	5.23457	18.903	1.38e-05	0.000298866	0.895963	5.38629	16.1339	5.9e-05	0.000815596
1:1:310035127	Hypo	1H	310035127	1	1.20806	2.42827	12.4651	0.000414631	0.00569075	1.51316	2.59113	18.0478	2.15e-05	0.000425761	1.53036	2.72506	12.2349	0.000469028	0.00390056
1:1:310063605	Hypo	1H	310063605	1	0.672553	4.9489	16.0872	6.05e-05	0.0013912	0.959886	5.13718	27.4416	1.62e-07	8.3e-06	0.719264	5.13493	10.2152	0.00139289	0.00887654
1:2:310070737	Hyper	1H	310070737	2	-1.0336	4.29322	25.6206	4.16e-07	3.21e-05	-0.977203	4.34176	17.8309	2.41e-05	0.000467025	-1.38944	4.55874	29.5005	5.59e-08	3.62e-06
1:1:310173314	Hypo	1H	310173314	1	1.7519	2.61456	26.2776	2.96e-07	2.47e-05	1.73695	2.65404	23.5187	1.24e-06	4.36e-05	2.1924	2.93195	25.7991	3.79e-07	1.63e-05
1:1:310767683	Hypo	1H	310767683	1	1.15915	3.1652	16.3663	5.22e-05	0.00123497	1.34103	3.28517	22.1723	2.49e-06	7.72e-05	1.20931	3.34995	12.492	0.000408701	0.00352108
1:1:311001931	Hypo	1H	311001931	1	1.51138	2.90732	24.5678	7.17e-07	4.83e-05	1.61458	2.99093	23.8953	1.02e-06	3.7e-05	2.01723	3.2626	41.664	1.08e-10	2.81e-08
1:1:311139348	Hyper	1H	311139348	1	-0.847125	4.2114	22.3432	2.28e-06	0.000117372	-1.03949	4.19325	27.7567	1.38e-07	7.28e-06	-1.18216	4.45278	27.4414	1.62e-07	8.35e-06
1:1:311199143	Hypo	1H	311199143	1	0.694186	5.46469	28.0022	1.21e-07	1.24e-05	0.67943	5.47137	16.8763	3.99e-05	0.000693984	0.875866	5.71244	25.2708	4.98e-07	2.01e-05
1:1:311812857	Hypo	1H	311812857	1	1.04947	3.21923	12.1447	0.000492277	0.00644512	1.51264	3.47637	31.5095	1.98e-08	1.46e-06	1.85954	3.74708	32.8397	1e-08	9.49e-07
1:1:311861805	Hypo	1H	311861805	1	0.857209	3.56734	11.0381	0.000892597	0.00983393	1.27269	3.81727	24.0159	9.55e-07	3.52e-05	1.57199	4.06978	27.6851	1.43e-07	7.57e-06
1:1:311918735	Hyper	1H	311918735	1	-0.678813	4.42788	13.173	0.000284006	0.00432246	-1.00789	4.35312	19.7598	8.78e-06	0.000210452	-1.21382	4.5991	25.1878	5.2e-07	2.08e-05
1:1:312004452	Hypo	1H	312004452	1	0.461374	6.30329	12.6189	0.00038187	0.00536002	0.59278	6.39254	18.061	2.14e-05	0.000423769	0.761358	6.62699	19.0175	1.3e-05	0.000252088
1:1:312381397	Hypo	1H	312381397	1	1.34381	3.00693	18.2256	1.96e-05	0.000601366	1.46043	3.102	18.8861	1.39e-05	0.0003009	1.68126	3.29612	20.4565	6.1e-06	0.000138844
1:1:313934097	Hyper	1H	313934097	1	-1.56986	2.82118	23.6521	1.15e-06	6.97e-05	-1.43837	2.90733	18.1244	2.07e-05	0.000412573	-1.74355	3.15066	18.4591	1.74e-05	0.000316801
1:1:314418251	Hypo	1H	314418251	1	1.13256	3.58744	17.2122	3.34e-05	0.000892203	1.48795	3.80512	35.0224	3.26e-09	3.32e-07	1.6904	4.00123	33.5215	7.05e-09	7.23e-07
1:1:314490490	Hypo	1H	314490490	1	1.37557	3.19295	26.4196	2.75e-07	2.33e-05	1.37492	3.22948	24.6232	6.97e-07	2.73e-05	1.38964	3.34585	18.6022	1.61e-05	0.000298828
1:1:314560056	Hypo	1H	314560056	1	1.2237	2.80658	14.6988	0.00012613	0.00238674	1.55483	2.98502	30.9613	2.63e-08	1.87e-06	1.32411	3.01714	13.4015	0.000251425	0.00244052
1:1:315584325	Hypo	1H	315584325	1	1.51839	3.19266	22.8142	1.78e-06	9.7e-05	1.54352	3.23655	24.2764	8.35e-07	3.15e-05	1.83275	3.48065	19.4242	1.05e-05	0.00021252
1:1:316824408	Hypo	1H	316824408	1	0.775435	5.04025	20.5975	5.67e-06	0.000238584	1.11279	5.26751	37.771	7.96e-10	1.03e-07	1.01719	5.31381	23.6859	1.13e-06	3.84e-05
1:1:318091031	Hyper	1H	318091031	1	-0.540879	4.54702	11.3014	0.000774478	0.00890246	-0.579834	4.55676	11.4521	0.00071414	0.00648015	-0.679206	4.78608	10.8667	0.000979062	0.00678535
1:1:318471107	Hyper	1H	318471107	1	-0.703437	4.57894	19.5954	9.57e-06	0.000352034	-0.801531	4.57285	21.8236	2.99e-06	8.94e-05	-0.839596	4.82689	16.4228	5.07e-05	0.000726179
1:1:321395422	Hypo	1H	321395422	1	1.42178	3.31534	20.6101	5.63e-06	0.000237442	1.87215	3.59292	39.0599	4.11e-10	6.06e-08	1.8957	3.6859	24.8341	6.25e-07	2.4e-05
1:1:323470155	Hypo	1H	323470155	1	0.821764	3.93988	14.984	0.000108426	0.00213524	0.878075	3.99891	13.1532	0.000287034	0.00325824	1.18171	4.27455	17.8086	2.44e-05	0.000414311
1:1:323693212	Hypo	1H	323693212	1	1.23555	2.79035	11.8904	0.000564225	0.00711307	1.21223	2.83078	11.9983	0.000532492	0.00519822	1.40085	3.02264	14.8422	0.000116891	0.00136761
1:1:328176051	Hyper	1H	328176051	1	-0.980313	5.35077	26.6312	2.46e-07	2.14e-05	-0.882251	5.39675	21.5976	3.36e-06	9.84e-05	-1.2102	5.61482	27.194	1.84e-07	9.23e-06
1:1:329267125	Hypo	1H	329267125	1	1.27036	3.4349	23.49	1.26e-06	7.39e-05	1.70998	3.69188	33.6457	6.61e-09	5.83e-07	1.70434	3.75433	23.0587	1.57e-06	4.94e-05
1:2:331024866	Hyper	1H	331024866	2	-1.07735	3.03423	14.1071	0.000172694	0.00300826	-1.46267	3.03869	21.6797	3.22e-06	9.5e-05	-1.49044	3.30187	17.0804	3.58e-05	0.000556833
1:1:331086007	Hyper	1H	331086007	1	-0.962568	3.19262	12.8747	0.000333054	0.00485664	-1.0548	3.22897	14.8622	0.000115656	0.00160263	-1.24297	3.45618	14.1426	0.00016946	0.00180805
1:1:334667600	Hypo	1H	334667600	1	1.18737	4.47775	34.6078	4.03e-09	8.96e-07	1.48643	4.69024	45.1177	1.86e-11	4.92e-09	1.57242	4.81505	43.0354	5.38e-11	1.62e-08
1:1:336047644	Hypo	1H	336047644	1	1.27691	2.94755	15.924	6.59e-05	0.00148518	1.46946	3.07078	21.0908	4.38e-06	0.000121421	1.25251	3.10548	11.7161	0.000619619	0.0048306
1:1:339927226	Hyper	1H	339927226	1	-0.858056	6.02178	21.5873	3.38e-06	0.000159545	-0.715118	6.0869	10.4234	0.00124431	0.00987917	-1.0926	6.26388	22.082	2.61e-06	7.26e-05
1:1:339927356	Hypo	1H	339927356	1	0.801747	5.51958	14.7016	0.000125938	0.00238388	1.04029	5.68954	25.2402	5.06e-07	2.11e-05	1.41	6.01007	32.2716	1.34e-08	1.2e-06
1:1:340811667	Hypo	1H	340811667	1	1.16474	2.48912	11.0032	0.000909547	0.0099681	1.35967	2.6232	12.2022	0.000477323	0.00478171	1.85583	2.9484	15.0123	0.000106811	0.00127772
1:1:349216342	Hypo	1H	349216342	1	0.807588	5.05341	21.3723	3.78e-06	0.000173721	0.922578	5.14271	24.1677	8.83e-07	3.3e-05	1.13557	5.36917	30.8704	2.76e-08	2.12e-06
1:1:351156270	Hypo	1H	351156270	1	1.34559	3.03415	14.3523	0.000151592	0.00273279	1.43825	3.11474	16.8457	4.05e-05	0.000702527	1.93304	3.45901	22.5468	2.05e-06	6.07e-05
1:1:351188709	Hypo	1H	351188709	1	1.16227	4.20867	31.5686	1.93e-08	2.92e-06	1.19528	4.25144	36.3075	1.69e-09	1.92e-07	0.899115	4.21182	11.2847	0.000781476	0.00574032
1:1:358624867	Hypo	1H	358624867	1	1.58182	2.53621	18.7807	1.47e-05	0.000481906	1.86828	2.69463	27.6788	1.43e-07	7.52e-06	1.88406	2.8212	19.5619	9.74e-06	0.000200671
1:1:358634437	Hypo	1H	358634437	1	1.30953	3.08597	19.2019	1.18e-05	0.000409662	1.44522	3.18497	22.8184	1.78e-06	5.9e-05	1.97739	3.54505	30.628	3.13e-08	2.33e-06
1:1:359892464	Hypo	1H	359892464	1	1.73278	2.80715	19.2482	1.15e-05	0.00040288	1.72877	2.85374	24.2874	8.3e-07	3.14e-05	1.90106	3.03524	22.3834	2.23e-06	6.45e-05
1:1:361566696	Hyper	1H	361566696	1	-1.27973	2.48571	13.5457	0.000232821	0.00374195	-1.54952	2.52868	18.4247	1.77e-05	0.000363119	-1.55763	2.7805	12.5212	0.000402364	0.0034765
1:1:361572209	Hypo	1H	361572209	1	1.16792	4.24485	27.8712	1.3e-07	1.31e-05	1.52055	4.48259	39.3919	3.47e-10	5.23e-08	1.21294	4.39808	19.6162	9.47e-06	0.000196395
1:1:362063838	Hypo	1H	362063838	1	1.19598	5.11443	40.972	1.54e-10	7.73e-08	1.21699	5.14631	37.4338	9.46e-10	1.17e-07	1.20189	5.22551	29.6248	5.24e-08	3.45e-06
1:1:362169859	Hypo	1H	362169859	1	1.16289	3.50282	17.5654	2.78e-05	0.000779512	1.31268	3.61395	22.2986	2.33e-06	7.33e-05	1.2012	3.68509	12.2508	0.00046506	0.00387703
1:1:362759871	Hypo	1H	362759871	1	1.08199	4.02403	18.1117	2.08e-05	0.000629348	1.06282	4.05008	14.162	0.000167727	0.00215377	1.18453	4.2121	17.5209	2.84e-05	0.000466741
1:1:362862962	Hypo	1H	362862962	1	1.8021	2.81741	19.7194	8.97e-06	0.000336013	1.83756	2.87761	30.786	2.88e-08	2.01e-06	2.1561	3.10466	19.5242	9.93e-06	0.000204026
1:1:362893653	Hypo	1H	362893653	1	1.3089	4.24343	37.82	7.76e-10	2.55e-07	1.29451	4.25365	33.9819	5.56e-09	5.06e-07	1.1731	4.30152	19.8112	8.55e-06	0.000180762
1:1:363052797	Hypo	1H	363052797	1	1.11901	3.02109	13.5804	0.000228561	0.00368791	1.42123	3.1999	24.2387	8.51e-07	3.2e-05	1.3129	3.26946	11.4418	0.000718095	0.00539961
1:1:363207647	Hypo	1H	363207647	1	1.16087	5.16314	56.0947	6.91e-14	2.38e-10	1.23776	5.22247	41.1623	1.4e-10	2.52e-08	1.23523	5.31336	31.9678	1.57e-08	1.35e-06
1:1:363331507	Hypo	1H	363331507	1	1.03122	3.32724	12.0828	0.000508892	0.0066024	1.78934	3.75996	51.5187	7.09e-13	3.61e-10	1.71976	3.79893	32.548	1.16e-08	1.07e-06
1:1:363421781	Hypo	1H	363421781	1	1.53038	3.14919	24.3917	7.86e-07	5.2e-05	1.75644	3.29505	34.8697	3.53e-09	3.54e-07	1.84433	3.43096	25.3835	4.7e-07	1.93e-05
1:1:363615288	Hypo	1H	363615288	1	1.71675	3.02965	31.3822	2.12e-08	3.17e-06	1.84541	3.12661	29.3429	6.06e-08	3.7e-06	1.93324	3.25036	21.8762	2.91e-06	7.87e-05
1:1:363757888	Hyper	1H	363757888	1	-0.714104	9.00121	26.2331	3.03e-07	2.51e-05	-0.582343	9.04966	18.2102	1.98e-05	0.000398398	-1.16325	9.17346	33.3111	7.85e-09	7.81e-07
1:1:363789383	Hyper	1H	363789383	1	-1.03907	3.03431	13.3492	0.000258535	0.00404015	-1.04563	3.08716	11.6144	0.000654443	0.00606441	-1.25588	3.31905	10.4642	0.00121708	0.00799811
1:1:364586212	Hypo	1H	364586212	1	1.27429	2.92914	14.3744	0.000149824	0.00270855	1.65603	3.13639	31.5685	1.93e-08	1.43e-06	1.79891	3.30946	24.4183	7.75e-07	2.84e-05
1:1:364902580	Hypo	1H	364902580	1	1.38255	2.8925	14.239	0.000160999	0.00286106	1.72482	3.08771	27.6819	1.43e-07	7.52e-06	1.89174	3.27853	21.565	3.42e-06	8.92e-05
1:1:368315750	Hypo	1H	368315750	1	1.02756	3.09585	11.7019	0.000624367	0.00765119	1.04288	3.14707	11.1349	0.000847179	0.00737651	1.62333	3.52803	20.6126	5.62e-06	0.000130777
1:1:368433104	Hypo	1H	368433104	1	0.850405	4.28891	14.0839	0.000174838	0.00303451	0.914117	4.35009	15.2122	9.61e-05	0.00138314	1.10765	4.56751	17.6721	2.62e-05	0.000438073
1:1:369210327	Hypo	1H	369210327	1	0.732693	6.14203	15.1325	0.000100225	0.00201948	0.828078	6.22376	15.4333	8.55e-05	0.00125735	0.824026	6.3451	12.9823	0.000314451	0.00289289
1:1:370190737	Hypo	1H	370190737	1	1.28049	3.70168	26.4248	2.74e-07	2.32e-05	1.37342	3.77882	29.7012	5.04e-08	3.18e-06	1.83001	4.11839	37.3719	9.76e-10	1.54e-07
1:1:370295701	Hypo	1H	370295701	1	1.15344	3.2352	16.5139	4.83e-05	0.00116752	1.68514	3.53387	44.7411	2.25e-11	5.84e-09	1.75954	3.66533	32.5342	1.17e-08	1.07e-06
1:1:370533345	Hypo	1H	370533345	1	1.83512	2.86527	33.3972	7.51e-09	1.42e-06	1.90823	2.95035	37.9253	7.35e-10	9.68e-08	2.59283	3.33068	45.145	1.83e-11	6.97e-09
1:1:370610256	Hypo	1H	370610256	1	1.61676	2.92815	23.4124	1.31e-06	7.61e-05	2.02011	3.1589	40.4106	2.06e-10	3.37e-08	1.99483	3.23389	21.7764	3.06e-06	8.2e-05
1:1:370868813	Hypo	1H	370868813	1	1.60712	2.77772	22.0267	2.69e-06	0.000133681	1.35548	2.73212	13.8702	0.000195875	0.00242976	1.3556	2.86636	11.2394	0.00080077	0.00584625
1:1:371104208	Hypo	1H	371104208	1	1.14922	3.5545	17.9064	2.32e-05	0.000680816	1.35194	3.68715	32.1392	1.44e-08	1.1e-06	1.6811	3.95736	32.214	1.38e-08	1.22e-06
1:1:371215854	Hypo	1H	371215854	1	1.11906	3.8922	22.7695	1.83e-06	9.88e-05	1.67631	4.2445	49.7277	1.77e-12	7.69e-10	1.3966	4.16871	22.9177	1.69e-06	5.22e-05
1:1:372660407	Hypo	1H	372660407	1	1.34922	4.20468	34.2712	4.79e-09	1.02e-06	1.51146	4.32517	41.1605	1.4e-10	2.52e-08	1.37419	4.33815	25.0182	5.68e-07	2.22e-05
1:1:373550119	Hypo	1H	373550119	1	0.705596	6.19031	18.2354	1.95e-05	0.000599504	0.964447	6.37128	30.5567	3.24e-08	2.21e-06	0.931986	6.46601	18.799	1.45e-05	0.00027636
1:1:374209311	Hypo	1H	374209311	1	2.03653	2.34866	23.5266	1.23e-06	7.31e-05	1.87366	2.38281	15.2786	9.28e-05	0.00134373	2.94609	2.86345	39.8421	2.75e-10	5.76e-08
1:1:376539648	Hyper	1H	376539648	1	-1.62915	4.12238	31.9212	1.61e-08	2.55e-06	-1.2779	4.22843	18.8085	1.45e-05	0.000310066	-2.25276	4.41935	36.4764	1.55e-09	2.24e-07
1:1:378690979	Hypo	1H	378690979	1	0.804611	5.01168	19.5713	9.69e-06	0.000355583	0.83124	5.04785	20.1623	7.11e-06	0.000177847	0.984904	5.24567	24.1284	9.01e-07	3.21e-05
1:1:378715391	Hypo	1H	378715391	1	0.667544	5.85178	18.1249	2.07e-05	0.000626109	0.720396	5.90623	18.0356	2.17e-05	0.000427794	0.671931	6.00919	10.7831	0.00102429	0.00701532
1:1:383304223	Hypo	1H	383304223	1	1.55916	2.75162	21.0644	4.44e-06	0.00019708	1.92918	2.95117	37.7888	7.88e-10	1.03e-07	2.41105	3.26497	50.8719	9.86e-13	7.1e-10
1:1:383323809	Hypo	1H	383323809	1	0.604799	5.65474	16.639	4.52e-05	0.0011129	0.787701	5.78088	19.9767	7.84e-06	0.00019231	0.919109	5.97444	21.9001	2.87e-06	7.79e-05
1:1:388044690	Hypo	1H	388044690	1	1.49882	2.58453	17.2713	3.24e-05	0.00087197	1.5106	2.63526	18.6304	1.59e-05	0.000334756	2.14101	2.99419	31.9177	1.61e-08	1.38e-06
1:1:389118791	Hypo	1H	389118791	1	1.01543	4.06255	22.1618	2.51e-06	0.000126378	1.32117	4.26247	41.6186	1.11e-10	2.08e-08	1.29056	4.33808	26.9404	2.1e-07	1.02e-05
1:1:391398086	Hypo	1H	391398086	1	1.23195	2.54015	14.4609	0.0001431	0.00262283	1.21074	2.59677	10.5384	0.00116918	0.00941342	1.61434	2.8496	11.8767	0.000568421	0.00451707
1:1:391515856	Hypo	1H	391515856	1	1.60678	2.94842	29.6578	5.15e-08	6.46e-06	1.95547	3.15372	46.8689	7.59e-12	2.39e-09	1.89959	3.21485	26.9344	2.1e-07	1.02e-05
1:1:391519254	Hypo	1H	391519254	1	1.76259	3.70013	25.929	3.54e-07	2.85e-05	1.75023	3.71268	43.6436	3.94e-11	9.14e-09	1.92748	3.88425	31.6203	1.87e-08	1.57e-06
1:1:391686361	Hypo	1H	391686361	1	1.07127	3.11668	13.7805	0.000205461	0.00340945	1.62609	3.42089	38.0855	6.77e-10	9.11e-08	1.45574	3.44083	18.3069	1.88e-05	0.000336304
1:1:391950697	Hypo	1H	391950697	1	1.12851	3.46843	16.5448	4.75e-05	0.00115328	1.76306	3.84115	53.2772	2.9e-13	1.84e-10	1.87122	3.9824	36.5931	1.46e-09	2.12e-07
1:1:395336961	Hypo	1H	395336961	1	1.03096	3.56763	17.4422	2.96e-05	0.000816656	1.5273	3.86378	41.4229	1.23e-10	2.23e-08	1.39996	3.89094	22.2432	2.4e-06	6.8e-05
1:1:395342595	Hypo	1H	395342595	1	1.10815	3.22159	14.9423	0.000110847	0.00216998	1.4497	3.42332	26.901	2.14e-07	1.05e-05	1.75452	3.6677	34.6607	3.92e-09	4.61e-07
1:1:397364734	Hypo	1H	397364734	1	1.18303	2.94195	18.8115	1.44e-05	0.000476444	1.30538	3.0385	20.9907	4.62e-06	0.000126466	1.34974	3.18926	12.3307	0.00044558	0.00375267
1:1:398192881	Hypo	1H	398192881	1	1.68065	2.86158	24.8774	6.11e-07	4.29e-05	1.98196	3.0402	32.8495	9.96e-09	8.18e-07	2.44284	3.34777	32.6171	1.12e-08	1.04e-06
1:1:398193836	Hypo	1H	398193836	1	1.04438	3.46809	14.133	0.000170331	0.00298062	1.36643	3.66371	25.5876	4.23e-07	1.82e-05	1.62864	3.91424	23.3711	1.34e-06	4.35e-05
1:1:398201683	Hypo	1H	398201683	1	1.22353	3.33119	20.1707	7.08e-06	0.000281581	1.42545	3.46434	28.9794	7.32e-08	4.33e-06	1.41613	3.57001	18.8379	1.42e-05	0.000272132
1:1:398204887	Hyper	1H	398204887	1	-1.12171	3.07377	19.3485	1.09e-05	0.000387103	-0.951478	3.16601	12.9767	0.000315394	0.00350278	-1.61997	3.33961	22.1919	2.47e-06	6.95e-05
1:1:398233118	Hypo	1H	398233118	1	1.53768	2.49274	13.5952	0.00022676	0.0036676	1.68366	2.60266	18.3932	1.8e-05	0.00036846	1.70002	2.73557	12.1472	0.000491614	0.0040414
1:1:398588586	Hyper	1H	398588586	1	-1.18908	2.67206	13.8459	0.00019843	0.00332381	-1.30132	2.7307	14.907	0.00011294	0.00157416	-1.46319	2.95725	13.7524	0.000208554	0.00212152
1:1:398592928	Hypo	1H	398592928	1	0.775604	5.20666	17.1655	3.43e-05	0.000909315	0.918104	5.31484	29.6543	5.16e-08	3.25e-06	1.02948	5.48419	18.9941	1.31e-05	0.000254596
1:1:398888482	Hypo	1H	398888482	1	0.838473	4.3474	20.0645	7.49e-06	0.000293697	0.892455	4.39238	16.7502	4.26e-05	0.000731199	1.60029	4.90194	35.9727	2e-09	2.72e-07
1:1:401316705	Hypo	1H	401316705	1	1.6522	3.51408	31.5878	1.91e-08	2.89e-06	1.67606	3.54656	35.9313	2.04e-09	2.25e-07	1.89126	3.74646	33.9842	5.56e-09	6e-07
1:1:401973979	Hypo	1H	401973979	1	0.521914	5.46329	15.3563	8.9e-05	0.00186182	0.617962	5.53402	16.5457	4.75e-05	0.000793774	0.584629	5.66518	11.322	0.000765955	0.00565312
1:1:402068268	Hypo	1H	402068268	1	1.38448	3.56715	21.6433	3.28e-06	0.000156002	1.5211	3.66985	28.5767	9.01e-08	5.14e-06	1.56674	3.78798	24.2992	8.25e-07	2.99e-05
1:1:402074763	Hypo	1H	402074763	1	1.30192	3.71014	21.5044	3.53e-06	0.000164766	1.62684	3.91398	40.9098	1.59e-10	2.78e-08	1.75559	4.08933	26.5312	2.59e-07	1.2e-05
1:1:402088496	Hypo	1H	402088496	1	1.50046	3.35498	31.0534	2.51e-08	3.6e-06	2.04414	3.68516	67.2966	2.34e-16	8.9e-13	2.29401	3.89233	59.0664	1.52e-14	2.95e-11
1:1:402459425	Hypo	1H	402459425	1	0.949295	4.93441	30.1186	4.06e-08	5.28e-06	1.2347	5.13022	41.9534	9.35e-11	1.81e-08	1.2377	5.22675	34.2836	4.76e-09	5.37e-07
1:1:402468564	Hypo	1H	402468564	1	1.20084	2.89868	11.6411	0.000645121	0.00783217	1.56895	3.08478	26.2036	3.07e-07	1.4e-05	1.85921	3.37123	20.3869	6.33e-06	0.000143065
1:1:402769007	Hypo	1H	402769007	1	2.18798	2.90017	37.4889	9.19e-10	2.89e-07	2.60017	3.14075	66.4938	3.51e-16	1.08e-12	2.43248	3.13372	35.0835	3.16e-09	3.88e-07
1:1:403389198	Hypo	1H	403389198	1	1.07795	4.37695	27.6682	1.44e-07	1.42e-05	1.05519	4.38484	26.9303	2.11e-07	1.03e-05	1.03578	4.49063	17.07	3.6e-05	0.000559005
1:1:404723040	Hypo	1H	404723040	1	1.17416	4.81523	37.6864	8.31e-10	2.73e-07	1.15181	4.81823	33.845	5.97e-09	5.34e-07	1.1177	4.90352	22.9187	1.69e-06	5.22e-05
1:1:404730553	Hypo	1H	404730553	1	1.41821	3.03189	16.0615	6.13e-05	0.00140478	1.62931	3.16419	27.1562	1.88e-07	9.4e-06	1.91306	3.40234	25.8217	3.74e-07	1.61e-05
1:1:405806908	Hypo	1H	405806908	1	1.63978	3.33775	40.2633	2.22e-10	1e-07	1.69693	3.39416	34.2962	4.73e-09	4.45e-07	2.0817	3.67818	46.0615	1.15e-11	4.9e-09
1:1:407163609	Hypo	1H	407163609	1	1.18982	3.53713	16.9276	3.88e-05	0.000998181	1.55749	3.76145	38.1385	6.59e-10	8.91e-08	1.94778	4.06079	39.769	2.86e-10	5.92e-08
1:1:407853375	Hypo	1H	407853375	1	1.33001	3.33253	15.5273	8.13e-05	0.00174087	1.89549	3.66092	42.8993	5.76e-11	1.26e-08	2.04868	3.82338	34.8385	3.58e-09	4.28e-07
1:1:409507999	Hypo	1H	409507999	1	1.00206	4.14857	28.312	1.03e-07	1.1e-05	1.22892	4.29997	34.7058	3.83e-09	3.78e-07	1.54503	4.57013	50.2386	1.36e-12	8.84e-10
1:1:409558185	Hypo	1H	409558185	1	1.07309	4.5745	23.7643	1.09e-06	6.69e-05	1.31848	4.7438	39.3368	3.57e-10	5.35e-08	1.51276	4.94317	47.2428	6.27e-12	3.01e-09
1:1:410398381	Hyper	1H	410398381	1	-0.826072	7.21096	39.0429	4.15e-10	1.59e-07	-0.800305	7.2314	29.7807	4.84e-08	3.09e-06	-1.22452	7.40842	40.6592	1.81e-10	4.22e-08
1:1:410398497	Hyper	1H	410398497	1	-0.732455	4.97155	18.1004	2.1e-05	0.00063165	-0.602431	5.03622	13.5733	0.000229421	0.0027425	-0.95418	5.2088	18.9468	1.34e-05	0.000259867
1:1:410398524	Hyper	1H	410398524	1	-0.482058	10.4171	15.8856	6.73e-05	0.00150822	-0.636402	10.3504	29.9496	4.43e-08	2.87e-06	-0.911865	10.5589	19.1224	1.23e-05	0.00024119
1:1:411866695	Hypo	1H	411866695	1	0.672724	4.86721	16.4809	4.91e-05	0.00118296	0.796504	4.95938	18.458	1.74e-05	0.000358213	0.898419	5.14323	20.071	7.46e-06	0.00016271
1:1:411898084	Hypo	1H	411898084	1	1.21854	2.93074	17.4677	2.92e-05	0.000808543	1.17283	2.96736	11.5335	0.000683537	0.00626728	1.44694	3.2009	13.1476	0.000287888	0.0027055
1:1:411983471	Hypo	1H	411983471	1	1.49041	3.47621	24.5881	7.1e-07	4.79e-05	1.65758	3.59685	28.2575	1.06e-07	5.87e-06	1.70125	3.71464	23.8622	1.03e-06	3.57e-05
1:1:412175955	Hypo	1H	412175955	1	0.677161	5.23241	21.7277	3.14e-06	0.000150797	0.706968	5.26558	21.9971	2.73e-06	8.3e-05	0.828325	5.46292	22.3687	2.25e-06	6.49e-05
1:1:412405773	Hypo	1H	412405773	1	1.09897	2.98533	14.2284	0.000161906	0.00287069	1.20927	3.07369	14.9556	0.000110073	0.00154175	1.74195	3.41008	28.3768	9.99e-08	5.77e-06
1:1:412906265	Hypo	1H	412906265	1	1.18869	3.50006	18.1101	2.08e-05	0.000629735	1.47967	3.67677	39.1212	3.98e-10	5.9e-08	1.95248	4.02946	38.2134	6.34e-10	1.09e-07
1:1:413745339	Hypo	1H	413745339	1	0.808974	5.45103	31.1598	2.38e-08	3.47e-06	0.785032	5.45153	25.0086	5.71e-07	2.32e-05	0.919684	5.6473	23.1636	1.49e-06	4.74e-05
1:1:415038348	Hyper	1H	415038348	1	-0.809298	3.49956	12.8002	0.00034659	0.00499443	-0.88105	3.52393	12.3916	0.000431269	0.00443422	-0.877239	3.78946	9.92882	0.00162711	0.00998124
1:1:416318589	Hypo	1H	416318589	1	1.18368	3.87197	20.9336	4.75e-06	0.000207903	1.49708	4.07455	42.9325	5.67e-11	1.24e-08	1.62949	4.24556	28.4918	9.41e-08	5.51e-06
1:1:416386345	Hypo	1H	416386345	1	1.73188	3.01206	37.4676	9.29e-10	2.9e-07	1.98358	3.17982	38.2557	6.21e-10	8.52e-08	1.88282	3.23217	21.8415	2.96e-06	7.98e-05
1:1:416478222	Hyper	1H	416478222	1	-0.755609	6.39443	17.7228	2.56e-05	0.000732976	-0.871228	6.35978	21.9274	2.83e-06	8.56e-05	-1.27785	6.56433	29.6713	5.12e-08	3.39e-06
1:1:416560917	Hypo	1H	416560917	1	1.09973	5.45982	34.4967	4.27e-09	9.35e-07	1.28448	5.5989	43.2005	4.94e-11	1.11e-08	0.699755	5.36925	10.8708	0.000976939	0.00677571
1:1:416576432	Hypo	1H	416576432	1	1.14854	4.36698	30.3561	3.6e-08	4.78e-06	1.4879	4.59817	51.0432	9.04e-13	4.37e-10	1.62112	4.74988	47.4562	5.62e-12	2.83e-09
1:1:418247128	Hypo	1H	418247128	1	1.25714	4.53979	31.2802	2.23e-08	3.31e-06	1.77094	4.89938	59.01	1.57e-14	2.1e-11	1.78877	4.96295	49.3977	2.09e-12	1.26e-09
1:1:418561317	Hypo	1H	418561317	1	1.55318	2.82893	20.7706	5.18e-06	0.000221974	1.89021	3.02079	33.9456	5.67e-09	5.14e-07	1.87682	3.13035	18.4283	1.76e-05	0.000320954
1:1:419091544	Hypo	1H	419091544	1	1.03904	3.42331	15.4955	8.27e-05	0.0017621	1.16883	3.51914	20.2715	6.72e-06	0.000169767	1.43107	3.75643	22.1449	2.53e-06	7.09e-05
1:1:419188712	Hypo	1H	419188712	1	1.31747	2.76057	14.8714	0.000115097	0.00222826	1.23059	2.77743	13.0117	0.000309552	0.00345006	1.41355	2.96102	10.3502	0.00129459	0.00839262
1:1:419224006	Hypo	1H	419224006	1	1.79117	2.73805	23.8537	1.04e-06	6.47e-05	1.97299	2.86318	24.0883	9.2e-07	3.42e-05	2.6882	3.29123	41.2032	1.37e-10	3.38e-08
1:1:419342635	Hypo	1H	419342635	1	0.816271	3.92645	12.1475	0.000491537	0.00643685	1.19381	4.15823	29.0953	6.89e-08	4.11e-06	1.15904	4.25185	14.4336	0.000145185	0.00160887
1:1:419906930	Hypo	1H	419906930	1	0.536209	4.80598	11.1198	0.00085411	0.00953967	0.631946	4.87819	14.1584	0.000168048	0.00215718	0.764915	5.08462	14.3262	0.000153712	0.00168147
1:1:419980140	Hypo	1H	419980140	1	1.15459	4.40584	30.4361	3.45e-08	4.64e-06	1.10151	4.3937	27.3021	1.74e-07	8.82e-06	0.859188	4.38395	12.9819	0.000314521	0.002893
1:1:420632451	Hypo	1H	420632451	1	1.22164	3.92816	21.6498	3.27e-06	0.000155668	1.52203	4.12689	38.135	6.6e-10	8.91e-08	1.45052	4.17536	24.3631	7.98e-07	2.91e-05
1:1:423432733	Hypo	1H	423432733	1	0.893426	3.96468	16.5264	4.8e-05	0.00116197	1.07203	4.09025	18.6021	1.61e-05	0.000338465	1.24799	4.28621	20.6824	5.42e-06	0.000127176
1:1:423457902	Hypo	1H	423457902	1	1.48543	2.80923	20.4048	6.27e-06	0.000255462	1.40602	2.83018	14.3817	0.000149242	0.00196154	2.33128	3.33387	35.4457	2.62e-09	3.35e-07
1:1:425402247	Hypo	1H	425402247	1	0.927618	4.21286	19.6421	9.34e-06	0.000346404	1.36058	4.48764	48.351	3.56e-12	1.32e-09	1.08206	4.44128	18.1488	2.04e-05	0.000359943
1:1:428250544	Hypo	1H	428250544	1	1.29448	4.21332	27.1031	1.93e-07	1.77e-05	1.51962	4.37142	42.5	7.07e-11	1.47e-08	1.49216	4.43114	33.3978	7.51e-09	7.57e-07
1:1:428445661	Hypo	1H	428445661	1	1.26579	3.40365	25.1872	5.2e-07	3.8e-05	1.11025	3.36104	17.6733	2.62e-05	0.000499508	0.986357	3.43974	9.92983	0.00162622	0.00997641
1:1:428519795	Hypo	1H	428519795	1	1.78509	2.34867	15.9334	6.56e-05	0.0014795	1.78685	2.41527	16.4016	5.12e-05	0.000841755	2.41371	2.73303	28.7685	8.16e-08	4.89e-06
1:1:428665215	Hypo	1H	428665215	1	0.86249	4.66268	17.8847	2.35e-05	0.000686579	0.986637	4.76229	20.0751	7.45e-06	0.000184679	1.02938	4.90163	15.3003	9.17e-05	0.00113405
1:1:428763797	Hypo	1H	428763797	1	0.813671	4.30858	12.6943	0.000366774	0.00520864	1.00292	4.44312	18.6239	1.59e-05	0.000335537	1.09146	4.59772	14.9697	0.000109254	0.0012986
1:1:428931159	Hypo	1H	428931159	1	0.882152	4.6111	17.5302	2.83e-05	0.000790158	1.18507	4.81005	34.4614	4.35e-09	4.18e-07	1.06523	4.84938	21.8057	3.02e-06	8.12e-05
1:2:428960059	Hypo	1H	428960059	2	0.950425	4.32598	27.038	1.99e-07	1.83e-05	1.27915	4.54748	36.2738	1.71e-09	1.95e-07	1.66082	4.85642	55.3059	1.03e-13	1.26e-10
1:1:429188276	Hyper	1H	429188276	1	-1.70737	2.45931	25.2719	4.98e-07	3.68e-05	-1.15122	2.60866	10.4161	0.00124923	0.00991019	-1.90916	2.79891	18.5206	1.68e-05	0.000309258
1:1:429459043	Hypo	1H	429459043	1	1.34189	3.50515	18.7537	1.49e-05	0.000487718	1.56611	3.65398	30.677	3.05e-08	2.1e-06	1.72433	3.81635	29.6562	5.16e-08	3.41e-06
1:1:429513871	Hyper	1H	429513871	1	-1.19145	4.7392	28.8651	7.76e-08	8.89e-06	-0.693605	4.9124	10.458	0.00122118	0.00974196	-1.17961	5.0767	19.861	8.33e-06	0.00017714
1:1:429521276	Hypo	1H	429521276	1	1.23503	3.21734	17.6258	2.69e-05	0.000761981	1.558	3.40695	36.3319	1.66e-09	1.9e-07	1.66598	3.56529	22.5597	2.04e-06	6.04e-05
1:1:430232555	Hypo	1H	430232555	1	0.778254	6.53943	28.6687	8.59e-08	9.59e-06	0.9981	6.69734	46.6689	8.41e-12	2.6e-09	1.72412	7.28266	30.4585	3.41e-08	2.49e-06
1:1:430237021	Hypo	1H	430237021	1	1.05228	4.41261	27.3062	1.74e-07	1.64e-05	1.21384	4.53246	30.1623	3.97e-08	2.61e-06	1.11018	4.57232	19.8522	8.37e-06	0.000177731
1:1:430245670	Hypo	1H	430245670	1	1.28141	3.02364	20.1307	7.23e-06	0.00028581	1.51825	3.18259	21.4849	3.57e-06	0.00010307	1.44314	3.26629	12.8495	0.000337574	0.00304544
1:1:430387892	Hypo	1H	430387892	1	1.03053	5.73287	39.5427	3.21e-10	1.32e-07	1.04475	5.76261	33.9074	5.78e-09	5.21e-07	1.05744	5.87019	24.9385	5.92e-07	2.3e-05
1:1:430490234	Hypo	1H	430490234	1	0.915875	4.3444	17.1353	3.48e-05	0.000920158	1.27953	4.58337	30.3704	3.57e-08	2.38e-06	1.42293	4.74899	29.0044	7.22e-08	4.44e-06
1:1:430532245	Hypo	1H	430532245	1	0.90903	3.33988	13.9326	0.000189479	0.00321457	0.856464	3.34783	10.8718	0.000976387	0.00822033	1.34049	3.67586	23.5517	1.22e-06	4.05e-05
1:1:430589297	Hypo	1H	430589297	1	1.703	3.33373	37.9732	7.17e-10	2.39e-07	1.78632	3.40816	43.2826	4.74e-11	1.07e-08	2.00226	3.59291	41.0613	1.48e-10	3.56e-08
1:1:430920148	Hypo	1H	430920148	1	0.770432	3.84461	12.2314	0.000469908	0.00623383	0.880575	3.92647	12.8091	0.000344932	0.00375084	0.933642	4.07369	11.8801	0.00056738	0.00451025
1:1:430975951	Hypo	1H	430975951	1	0.926951	3.18792	11.2527	0.000795056	0.00907471	1.58913	3.5494	37.2066	1.06e-09	1.3e-07	1.50619	3.60026	25.5209	4.38e-07	1.82e-05
1:1:430982854	Hypo	1H	430982854	1	0.964276	3.90125	18.7594	1.48e-05	0.000486383	1.14815	4.02968	24.2758	8.35e-07	3.15e-05	1.28334	4.2186	23.0402	1.59e-06	4.98e-05
1:1:431058015	Hypo	1H	431058015	1	1.21962	3.20025	16.2923	5.43e-05	0.00127476	1.50797	3.37448	25.219	5.12e-07	2.13e-05	1.88584	3.65114	35.3351	2.78e-09	3.51e-07
1:1:431132720	Hypo	1H	431132720	1	1.15325	3.4716	15.854	6.84e-05	0.00152843	1.20225	3.52639	18.8838	1.39e-05	0.000300917	1.04822	3.57929	10.9718	0.00092511	0.00649696
1:1:431157762	Hypo	1H	431157762	1	1.64199	4.04324	50.7916	1.03e-12	1.75e-09	1.9009	4.22634	67.8679	1.75e-16	7.55e-13	1.9306	4.31862	44.7909	2.19e-11	8.03e-09
1:1:434514264	Hyper	1H	434514264	1	-0.875785	5.80777	26.793	2.26e-07	2.01e-05	-0.969433	5.78823	25.1335	5.35e-07	2.2e-05	-1.19124	6.03581	30.3591	3.59e-08	2.57e-06
1:1:434900261	Hypo	1H	434900261	1	1.24888	3.72153	18.8898	1.38e-05	0.00046397	1.49239	3.88686	30.7625	2.92e-08	2.03e-06	1.18086	3.82163	12.9069	0.000327371	0.0029793
1:1:435188187	Hypo	1H	435188187	1	0.883099	4.48883	17.5747	2.76e-05	0.000776815	1.10957	4.64835	24.0844	9.22e-07	3.42e-05	0.954479	4.66929	13.51	0.00023729	0.00233884
1:1:435209404	Hypo	1H	435209404	1	1.1011	4.32516	30.3207	3.66e-08	4.85e-06	1.17424	4.39198	27.8018	1.34e-07	7.14e-06	1.36362	4.59525	32.7913	1.03e-08	9.68e-07
1:1:435444842	Hypo	1H	435444842	1	1.08147	2.8128	11.0875	0.000869115	0.00964946	1.12751	2.87801	12.3698	0.000436344	0.00447614	1.92761	3.32634	25.9603	3.49e-07	1.52e-05
1:1:435646830	Hypo	1H	435646830	1	1.1154	4.03545	19.3203	1.11e-05	0.00039096	1.33283	4.18201	40.3731	2.1e-10	3.42e-08	1.46069	4.35256	23.5756	1.2e-06	4.01e-05
1:1:435685905	Hypo	1H	435685905	1	1.20681	3.70286	19.8744	8.27e-06	0.000316684	1.44905	3.8679	27.61	1.48e-07	7.72e-06	1.82492	4.15574	32.3029	1.32e-08	1.18e-06
1:1:435726900	Hypo	1H	435726900	1	1.7015	2.79072	23.8997	1.01e-06	6.34e-05	1.86179	2.90351	33.3105	7.86e-09	6.72e-07	2.12036	3.11308	29.7572	4.9e-08	3.27e-06
1:1:435730717	Hypo	1H	435730717	1	1.18044	4.10003	25.9946	3.42e-07	2.78e-05	1.3117	4.19458	38.131	6.62e-10	8.92e-08	1.00482	4.1465	16.0984	6.01e-05	0.000827883
1:1:436122188	Hypo	1H	436122188	1	1.08611	2.96939	12.3891	0.000431852	0.00586059	1.68975	3.28813	30.4428	3.44e-08	2.31e-06	1.42948	3.28101	13.7011	0.000214333	0.00216802
1:1:436318764	Hypo	1H	436318764	1	0.795589	4.5937	20.0641	7.49e-06	0.000293697	0.797413	4.61431	16.605	4.6e-05	0.000775458	0.803766	4.75277	14.3549	0.000151387	0.00166192
1:1:436342953	Hypo	1H	436342953	1	1.65921	3.00522	26.8526	2.2e-07	1.96e-05	1.44978	2.95186	17.0888	3.57e-05	0.000636336	1.51771	3.09591	13.4497	0.000245045	0.00239381
1:1:436586288	Hypo	1H	436586288	1	0.612256	5.89913	16.7469	4.27e-05	0.00106952	0.524587	5.86059	13.1352	0.000289796	0.00328085	0.606825	6.05825	11.0449	0.000889328	0.00631349
1:1:437709414	Hypo	1H	437709414	1	1.29737	4.07778	28.0295	1.19e-07	1.23e-05	1.48553	4.21201	34.939	3.4e-09	3.44e-07	1.40609	4.25375	25.0084	5.71e-07	2.23e-05
1:1:437729150	Hypo	1H	437729150	1	0.967336	3.4715	15.0014	0.000107431	0.00212386	0.939149	3.49312	12.8331	0.000340545	0.00371387	0.997874	3.64444	10.4587	0.00122072	0.00801369
1:1:437796111	Hypo	1H	437796111	1	1.16124	4.32851	27.4536	1.61e-07	1.55e-05	1.27436	4.4249	28.3041	1.04e-07	5.77e-06	1.01819	4.38236	14.65	0.000129436	0.00148003
1:1:437808561	Hypo	1H	437808561	1	0.898905	5.06003	20.7676	5.19e-06	0.000222232	0.995383	5.13953	19.559	9.75e-06	0.000228512	0.956136	5.22766	14.3858	0.00014892	0.00164013
1:1:437913696	Hypo	1H	437913696	1	0.742291	4.96097	18.9097	1.37e-05	0.000460444	0.825326	5.03326	20.5942	5.68e-06	0.000148705	0.960123	5.22898	22.2865	2.35e-06	6.69e-05
1:1:437949954	Hypo	1H	437949954	1	1.13722	3.19986	17.9779	2.23e-05	0.000661625	1.33851	3.33277	24.1492	8.92e-07	3.32e-05	1.66189	3.59432	27.793	1.35e-07	7.26e-06
1:1:437976205	Hypo	1H	437976205	1	0.970103	6.29698	23.917	1.01e-06	6.29e-05	1.21558	6.48104	33.6111	6.73e-09	5.92e-07	1.11017	6.50222	25.8252	3.74e-07	1.61e-05
1:1:438031107	Hypo	1H	438031107	1	0.861523	4.8112	21.426	3.68e-06	0.000170012	0.954074	4.88424	25.7892	3.81e-07	1.66e-05	0.869215	4.9616	16.7615	4.24e-05	0.000634025
1:1:438099534	Hypo	1H	438099534	1	1.2546	3.1661	16.1765	5.77e-05	0.00134059	1.47132	3.30114	20.9301	4.76e-06	0.000129645	1.34321	3.36523	13.1385	0.000289289	0.00271504
1:1:439914455	Hypo	1H	439914455	1	0.787962	4.93764	19.5081	1e-05	0.000364298	0.659568	4.88682	13.2322	0.000275176	0.00315495	0.735968	5.06102	12.972	0.000316191	0.00290403
1:1:440714513	Hypo	1H	440714513	1	1.07278	5.28761	29.7985	4.79e-08	6.06e-06	1.23312	5.41245	37.7007	8.25e-10	1.06e-07	1.38341	5.58844	37.2176	1.06e-09	1.63e-07
1:1:443740648	Hyper	1H	443740648	1	-0.776466	9.51964	33.479	7.2e-09	1.37e-06	-0.614857	9.58043	19.7144	8.99e-06	0.00021441	-1.16274	9.71655	29.3664	5.99e-08	3.82e-06
1:1:444497777	Hypo	1H	444497777	1	1.22022	3.67697	22.6565	1.94e-06	0.000103329	1.67684	3.961	56.8819	4.63e-14	4.82e-11	1.46927	3.93659	22.8141	1.78e-06	5.45e-05
1:1:445371233	Hypo	1H	445371233	1	0.838424	4.95625	22.2205	2.43e-06	0.000123632	0.997422	5.07222	28.4474	9.63e-08	5.44e-06	0.906759	5.13381	17.9397	2.28e-05	0.000392192
1:1:447959772	Hypo	1H	447959772	1	0.956406	3.54344	16.7938	4.17e-05	0.00105065	1.20939	3.70523	28.0875	1.16e-07	6.31e-06	1.57105	3.98664	37.3965	9.64e-10	1.52e-07
1:1:447978691	Hypo	1H	447978691	1	1.29298	3.97059	22.7705	1.83e-06	9.87e-05	1.58605	4.16865	40.0364	2.49e-10	3.96e-08	1.44047	4.16605	22.6991	1.89e-06	5.7e-05
1:1:448809923	Hyper	1H	448809923	1	-0.872785	5.44631	19.3742	1.07e-05	0.000383712	-0.847	5.4653	19.8119	8.54e-06	0.00020598	-1.27054	5.66595	24.1797	8.78e-07	3.14e-05
1:1:448841357	Hypo	1H	448841357	1	0.912698	3.91215	16.0703	6.1e-05	0.00140072	1.26367	4.12983	28.8723	7.73e-08	4.53e-06	0.992208	4.09722	10.7689	0.00103219	0.00705669
1:1:449232368	Hypo	1H	449232368	1	1.33956	3.52741	25.2911	4.93e-07	3.66e-05	1.2878	3.52965	21.7753	3.07e-06	9.13e-05	1.5264	3.75161	25.4472	4.55e-07	1.88e-05
1:1:449252721	Hypo	1H	449252721	1	1.15275	3.98225	25.3669	4.74e-07	3.56e-05	1.40159	4.15186	32.9388	9.51e-09	7.86e-07	1.60727	4.35865	35.965	2.01e-09	2.73e-07
1:1:449317025	Hypo	1H	449317025	1	0.809617	4.14408	12.5514	0.00039591	0.00550552	1.29891	4.44743	31.7503	1.75e-08	1.32e-06	1.21949	4.49673	22.3526	2.27e-06	6.52e-05
1:1:449369311	Hyper	1H	449369311	1	-0.993762	3.40487	16.1399	5.88e-05	0.0013617	-0.950882	3.46444	12.6955	0.000366542	0.00392942	-1.6891	3.63302	22.5885	2.01e-06	5.98e-05
1:1:449689974	Hyper	1H	449689974	1	-1.49835	2.84788	21.1903	4.16e-06	0.000187343	-1.27516	2.95494	13.3951	0.000252286	0.00295051	-1.37154	3.20051	12.072	0.000511851	0.00416777
1:1:449973683	Hypo	1H	449973683	1	1.19893	2.82946	12.1289	0.000496473	0.0064858	1.26475	2.90289	14.5029	0.000139945	0.00186496	1.40368	3.08657	12.3981	0.000429778	0.00365828
1:1:451440026	Hypo	1H	451440026	1	0.490106	5.57085	15.17	9.82e-05	0.00199181	0.65785	5.68432	19.4306	1.04e-05	0.000240972	0.792171	5.8931	19.4184	1.05e-05	0.000212945
1:1:451544992	Hypo	1H	451544992	1	0.823204	3.95784	11.5049	0.000694112	0.00822872	1.13257	4.1513	23.8545	1.04e-06	3.77e-05	1.55545	4.48293	34.187	5.01e-09	5.57e-07
1:1:451567702	Hypo	1H	451567702	1	0.860901	3.9667	12.0744	0.000511201	0.00662153	1.16557	4.15604	29.4844	5.64e-08	3.49e-06	1.31384	4.33642	28.8542	7.8e-08	4.73e-06
1:1:452969995	Hypo	1H	452969995	1	1.33352	2.93654	21.5606	3.43e-06	0.000161076	1.78446	3.18778	32.3443	1.29e-08	1.01e-06	1.41501	3.13896	14.7815	0.000120717	0.00140046
1:1:453017571	Hypo	1H	453017571	1	1.25377	4.79698	35.4902	2.56e-09	6.29e-07	1.47489	4.95772	52.8748	3.56e-13	2.14e-10	1.33513	4.95177	34.0248	5.44e-09	5.91e-07
1:1:453082492	Hypo	1H	453082492	1	0.842643	5.34654	23.336	1.36e-06	7.86e-05	0.930012	5.41307	24.9503	5.88e-07	2.38e-05	0.791445	5.46119	14.0419	0.000178785	0.00188675
1:1:453787756	Hypo	1H	453787756	1	1.40556	3.26523	22.4731	2.13e-06	0.000111382	1.65605	3.42485	35.0444	3.22e-09	3.29e-07	1.75735	3.5617	30.94	2.66e-08	2.06e-06
1:1:454786784	Hypo	1H	454786784	1	0.723805	5.23836	15.5238	8.15e-05	0.00174276	0.851295	5.33292	20.4889	6e-06	0.00015533	0.966929	5.51536	20.8414	4.99e-06	0.000119308
1:1:455018919	Hypo	1H	455018919	1	1.14262	3.1372	16.4805	4.92e-05	0.00118301	1.49016	3.33698	30.6737	3.05e-08	2.1e-06	1.58706	3.4853	20.162	7.12e-06	0.000157022
1:1:455111609	Hypo	1H	455111609	1	1.76646	3.12064	31.6511	1.85e-08	2.84e-06	2.16136	3.37141	40.1209	2.39e-10	3.83e-08	2.21174	3.46744	30.6751	3.05e-08	2.29e-06
1:1:455242964	Hypo	1H	455242964	1	1.46282	2.76049	16.4656	4.95e-05	0.00119015	1.38884	2.77999	13.4056	0.000250869	0.00293807	1.89169	3.09333	22.7354	1.86e-06	5.62e-05
1:1:455546389	Hypo	1H	455546389	1	0.847354	5.2602	34.2168	4.93e-09	1.04e-06	0.720969	5.1981	19.419	1.05e-05	0.000242146	0.891634	5.41787	21.8449	2.96e-06	7.97e-05
1:1:455560954	Hypo	1H	455560954	1	1.5149	3.77018	35.5427	2.5e-09	6.15e-07	1.77729	3.94934	51.5955	6.82e-13	3.55e-10	1.94754	4.11228	48.6837	3.01e-12	1.69e-09
1:1:455567338	Hypo	1H	455567338	1	1.51122	3.16552	27.506	1.57e-07	1.51e-05	1.4683	3.18051	25.0845	5.49e-07	2.25e-05	1.73304	3.41842	20.7767	5.16e-06	0.000122576
1:1:455664293	Hypo	1H	455664293	1	1.80781	3.20343	34.0161	5.47e-09	1.12e-06	1.71249	3.1874	26.4197	2.75e-07	1.28e-05	1.9001	3.36905	29.0521	7.05e-08	4.35e-06
1:1:455669046	Hypo	1H	455669046	1	0.659042	4.92121	12.2261	0.00047125	0.00624885	0.793264	5.01988	21.0998	4.36e-06	0.000120986	0.815414	5.15945	15.6543	7.6e-05	0.000987144
1:1:455754030	Hypo	1H	455754030	1	1.39375	3.0837	15.7548	7.21e-05	0.00159098	1.5135	3.17191	21.6652	3.25e-06	9.56e-05	2.19304	3.59915	40.9938	1.53e-10	3.64e-08
1:1:455803886	Hypo	1H	455803886	1	1.17424	4.32643	29.9534	4.43e-08	5.67e-06	1.50614	4.54904	46.1599	1.09e-11	3.17e-09	1.24245	4.48424	29.4587	5.71e-08	3.67e-06
1:1:455902079	Hypo	1H	455902079	1	0.745455	4.1581	14.006	0.000182224	0.00312624	0.895816	4.2667	17.3892	3.05e-05	0.000561314	0.784512	4.35491	10.0595	0.00151564	0.00945791
1:1:455946712	Hypo	1H	455946712	1	1.22874	4.79463	48.6979	2.99e-12	4.04e-09	1.28943	4.84883	43.6822	3.86e-11	8.98e-09	1.30865	4.95358	36.0315	1.94e-09	2.66e-07
1:1:456096660	Hypo	1H	456096660	1	0.87838	5.13812	24.875	6.12e-07	4.29e-05	0.839383	5.13715	22.1781	2.48e-06	7.7e-05	0.870442	5.2754	18.8306	1.43e-05	0.000272865
1:1:456142390	Hypo	1H	456142390	1	1.00202	3.44534	14.2436	0.00016061	0.00285456	1.15476	3.55036	17.9782	2.23e-05	0.00043843	1.05911	3.62969	13.6253	0.000223156	0.00223504
1:1:456360903	Hypo	1H	456360903	1	0.889098	4.04809	17.989	2.22e-05	0.000659552	1.11864	4.19364	23.1431	1.5e-06	5.14e-05	1.2036	4.3451	23.6245	1.17e-06	3.93e-05
1:1:456536412	Hypo	1H	456536412	1	1.63611	2.51046	16.6514	4.49e-05	0.0011085	1.96297	2.6781	36.5406	1.5e-09	1.75e-07	2.57753	3.05705	29.6236	5.25e-08	3.45e-06
1:1:456626042	Hypo	1H	456626042	1	1.30102	5.05163	42.8316	5.97e-11	3.76e-08	1.41168	5.14152	51.3672	7.66e-13	3.87e-10	1.42756	5.23056	37.9091	7.41e-10	1.23e-07
1:1:456707767	Hypo	1H	456707767	1	1.55771	2.77413	14.0954	0.000173768	0.00302188	1.44247	2.77764	11.1379	0.000845838	0.00737127	1.68445	3.00317	12.0522	0.000517326	0.00420376
1:1:456899097	Hypo	1H	456899097	1	1.34803	5.17774	47.4421	5.67e-12	6.88e-09	1.50867	5.30373	67.251	2.39e-16	8.9e-13	1.31487	5.26269	34.2819	4.77e-09	5.37e-07
1:1:457236605	Hypo	1H	457236605	1	0.974068	4.37571	18.6866	1.54e-05	0.000499946	1.19696	4.5251	32.0257	1.52e-08	1.16e-06	1.21679	4.64283	21.6932	3.2e-06	8.49e-05
1:1:457590735	Hypo	1H	457590735	1	1.11397	4.01621	18.5893	1.62e-05	0.000519056	1.41575	4.21018	37.1734	1.08e-09	1.32e-07	1.44098	4.3235	21.588	3.38e-06	8.84e-05
1:1:457635134	Hypo	1H	457635134	1	1.34548	3.73021	21.0175	4.55e-06	0.00020063	1.67456	3.94011	37.268	1.03e-09	1.26e-07	1.67543	4.01942	33.951	5.65e-09	6.07e-07
1:1:458141047	Hyper	1H	458141047	1	-0.931173	4.87899	23.6665	1.15e-06	6.94e-05	-0.69265	4.98237	11.655	0.00064029	0.00596692	-1.267	5.12093	27.7605	1.37e-07	7.35e-06
1:1:458348933	Hypo	1H	458348933	1	1.08228	3.69392	20.3004	6.62e-06	0.000266843	1.11857	3.74502	19.2676	1.14e-05	0.000257609	1.17015	3.88967	13.4901	0.000239823	0.00235584
1:1:458612509	Hypo	1H	458612509	1	1.18406	4.56389	30.398	3.52e-08	4.7e-06	1.55638	4.82292	43.3137	4.66e-11	1.06e-08	1.39032	4.79636	33.8948	5.82e-09	6.19e-07
1:1:458864873	Hyper	1H	458864873	1	-0.620055	4.50644	14.2605	0.000159171	0.00283533	-0.641196	4.51914	11.9302	0.000552323	0.00533953	-0.858177	4.72807	16.0006	6.33e-05	0.000859226
1:1:460445247	Hypo	1H	460445247	1	0.988592	9.29934	37.9986	7.08e-10	2.37e-07	1.18978	9.46031	50.3452	1.29e-12	5.88e-10	1.15619	9.52858	25.2554	5.02e-07	2.02e-05
1:1:460445304	Hypo	1H	460445304	1	1.10256	8.16531	39.7695	2.86e-10	1.2e-07	1.34709	8.35618	66.9876	2.73e-16	9.15e-13	1.93891	8.84322	42.9004	5.76e-11	1.7e-08
1:1:460468349	Hypo	1H	460468349	1	1.10311	2.6954	11.0527	0.000885575	0.00978191	1.86933	3.06345	32.2563	1.35e-08	1.05e-06	1.94488	3.1892	23.986	9.7e-07	3.39e-05
1:1:461359870	Hypo	1H	461359870	1	0.856722	4.66307	18.537	1.67e-05	0.000530219	1.20718	4.88727	27.4667	1.6e-07	8.23e-06	1.08793	4.91647	20.132	7.23e-06	0.000158721
1:1:461388358	Hypo	1H	461388358	1	1.03708	3.4898	16.4231	5.07e-05	0.00120906	1.67282	3.86124	43.4251	4.41e-11	1.01e-08	1.78551	4.01451	38.2512	6.22e-10	1.08e-07
1:1:461390248	Hypo	1H	461390248	1	1.29011	3.26307	17.3115	3.17e-05	0.000859692	1.54597	3.42366	28.0446	1.19e-07	6.44e-06	1.74745	3.62071	27.7219	1.4e-07	7.46e-06
1:1:461705427	Hypo	1H	461705427	1	1.32241	2.83733	14.2995	0.000155906	0.00278845	1.57764	2.9873	22.6959	1.9e-06	6.2e-05	1.81241	3.19922	20.9912	4.61e-06	0.000112265
1:1:462388161	Hypo	1H	462388161	1	1.41259	3.25921	26.4839	2.66e-07	2.26e-05	1.26616	3.2342	15.662	7.57e-05	0.00114011	1.77249	3.57823	23.6099	1.18e-06	3.95e-05
1:1:462416550	Hypo	1H	462416550	1	1.36173	2.74315	14.752	0.00012262	0.00233425	1.54255	2.85905	23.6147	1.18e-06	4.18e-05	1.59412	3.02125	11.6147	0.00065434	0.00503096
1:1:463023519	Hypo	1H	463023519	1	1.01893	4.96765	25.4717	4.49e-07	3.41e-05	1.28226	5.15412	42.922	5.7e-11	1.24e-08	1.06227	5.12306	20.7075	5.35e-06	0.00012579
1:1:463462936	Hypo	1H	463462936	1	1.34682	3.02533	17.7956	2.46e-05	0.000712682	1.35887	3.05476	25.3125	4.88e-07	2.04e-05	1.44861	3.23432	14.475	0.000142029	0.0015826
2:1:1834433	Hypo	2H	1834433	1	1.40992	3.7876	26.3313	2.88e-07	2.41e-05	1.6226	3.92705	44.5725	2.45e-11	6.3e-09	1.76125	4.10109	34.369	4.56e-09	5.18e-07
2:1:1893037	Hypo	2H	1893037	1	1.03222	6.05628	37.2124	1.06e-09	3.21e-07	1.19522	6.18148	45.4456	1.57e-11	4.32e-09	0.826941	6.06994	15.3551	8.91e-05	0.00110998
2:1:2494741	Hypo	2H	2494741	1	1.07753	3.8906	12.8861	0.000331034	0.00483844	1.18666	3.97607	21.3385	3.85e-06	0.00010938	1.3834	4.18137	25.429	4.59e-07	1.89e-05
2:1:2675589	Hypo	2H	2675589	1	2.35296	2.9328	40.6058	1.86e-10	8.73e-08	2.37987	2.98738	37.1636	1.09e-09	1.32e-07	2.75454	3.24374	49.7444	1.75e-12	1.09e-09
2:1:2706360	Hypo	2H	2706360	1	1.21716	5.02495	30.5332	3.28e-08	4.46e-06	1.29474	5.09292	42.6181	6.65e-11	1.4e-08	1.08955	5.07083	21.0156	4.56e-06	0.00011131
2:1:4193368	Hypo	2H	4193368	1	1.09011	3.78144	17.9242	2.3e-05	0.000675647	1.59266	4.08879	43.0321	5.38e-11	1.2e-08	1.69426	4.24062	32.1982	1.39e-08	1.23e-06
2:1:6978523	Hypo	2H	6978523	1	0.813929	5.41668	21.6621	3.25e-06	0.000154851	1.09483	5.61568	33.3913	7.54e-09	6.52e-07	1.28525	5.82196	34.796	3.66e-09	4.34e-07
2:1:7198645	Hypo	2H	7198645	1	1.54443	2.62683	19.1799	1.19e-05	0.000412943	1.44086	2.63584	17.6023	2.72e-05	0.000514147	2.30196	3.12485	25.0558	5.57e-07	2.19e-05
2:1:7930619	Hypo	2H	7930619	1	1.71808	3.02257	26.5552	2.56e-07	2.2e-05	1.97315	3.188	41.0259	1.5e-10	2.66e-08	2.543	3.56141	47.748	4.85e-12	2.48e-09
2:1:7936635	Hyper	2H	7936635	1	-1.17249	3.3816	19.8373	8.43e-06	0.00032126	-0.913038	3.49822	11.6059	0.000657414	0.00608462	-0.961391	3.75216	10.1877	0.00141381	0.00897165
2:1:7976408	Hypo	2H	7976408	1	1.12344	4.39697	18.7122	1.52e-05	0.000494896	1.58544	4.70652	60.8465	6.17e-15	1.01e-11	1.36072	4.65453	22.4405	2.17e-06	6.33e-05
2:1:8123756	Hypo	2H	8123756	1	1.31608	4.40797	24.7311	6.59e-07	4.54e-05	1.29902	4.41269	19.3375	1.1e-05	0.000250082	1.26707	4.49965	20.117	7.28e-06	0.000159625
2:1:8123813	Hypo	2H	8123813	1	1.79555	4.47303	54.2758	1.74e-13	4.41e-10	1.84058	4.51644	68.8558	1.06e-16	5.15e-13	1.96367	4.6463	61.8	3.8e-15	1.06e-11
2:1:8627487	Hypo	2H	8627487	1	1.19709	3.35503	18.8769	1.39e-05	0.000465662	1.49648	3.54037	24.1917	8.72e-07	3.26e-05	1.61531	3.70447	21.467	3.6e-06	9.29e-05
2:1:8658497	Hypo	2H	8658497	1	1.39702	4.44655	32.3644	1.28e-08	2.16e-06	1.41627	4.47976	39.5465	3.2e-10	4.88e-08	1.36378	4.52328	22.7481	1.85e-06	5.6e-05
2:1:8682469	Hypo	2H	8682469	1	1.06915	3.13063	12.7068	0.000364331	0.0051857	1.72614	3.49315	34.1174	5.19e-09	4.77e-07	1.62108	3.532	21.7913	3.04e-06	8.16e-05
2:1:8760185	Hypo	2H	8760185	1	1.34234	4.19266	26.4609	2.69e-07	2.28e-05	1.56045	4.34721	39.9662	2.58e-10	4.07e-08	1.48054	4.37558	24.1393	8.96e-07	3.2e-05
2:1:8835391	Hypo	2H	8835391	1	0.996394	3.24101	13.9253	0.00019022	0.00322439	1.32707	3.4375	22.6254	1.97e-06	6.39e-05	1.29884	3.53915	17.2187	3.33e-05	0.000527934
2:1:8870470	Hypo	2H	8870470	1	2.65165	2.97756	42.2981	7.84e-11	4.49e-08	2.81797	3.10322	54.6455	1.44e-13	1.13e-10	3.13093	3.33191	56.4976	5.63e-14	8.07e-11
2:1:8870501	Hypo	2H	8870501	1	1.71246	2.86941	19.4626	1.03e-05	0.00037114	1.63619	2.88267	21.3905	3.75e-06	0.000107157	1.87515	3.08954	21.068	4.43e-06	0.000109038
2:1:9794619	Hypo	2H	9794619	1	1.23812	4.18561	27.4439	1.62e-07	1.55e-05	1.21225	4.18989	26.8359	2.21e-07	1.07e-05	0.968438	4.17724	12.1324	0.000495521	0.0040681
2:1:10143388	Hypo	2H	10143388	1	1.40302	3.09898	16.1523	5.84e-05	0.00135414	1.53568	3.19434	22.6289	1.97e-06	6.38e-05	1.83654	3.43459	25.2259	5.1e-07	2.05e-05
2:1:12586423	Hypo	2H	12586423	1	1.20604	2.89036	14.1767	0.000166416	0.00292846	1.34464	3.0061	12.1922	0.000479896	0.00480378	2.22933	3.54909	21.2887	3.95e-06	9.96e-05
2:1:12759996	Hyper	2H	12759996	1	-1.82453	4.44883	35.6467	2.37e-09	5.91e-07	-1.03791	4.65486	11.1168	0.000855511	0.0074328	-2.57375	4.74953	42.0665	8.82e-11	2.39e-08
2:1:14600112	Hypo	2H	14600112	1	2.00293	2.91643	35.2435	2.91e-09	6.97e-07	1.91868	2.91956	26.6017	2.5e-07	1.19e-05	2.51399	3.27704	44.9305	2.04e-11	7.6e-09
2:1:14719392	Hypo	2H	14719392	1	1.32605	4.20564	19.829	8.47e-06	0.000322141	1.53526	4.34349	24.5321	7.31e-07	2.83e-05	1.68763	4.51563	27.2036	1.83e-07	9.19e-06
2:1:15551664	Hypo	2H	15551664	1	1.57894	3.18519	27.8155	1.33e-07	1.34e-05	1.7899	3.32765	36.1939	1.79e-09	2.02e-07	2.01126	3.52282	35.2341	2.92e-09	3.67e-07
2:1:15776984	Hypo	2H	15776984	1	1.05038	3.58518	15.8886	6.72e-05	0.00150755	1.18474	3.67779	21.7636	3.08e-06	9.17e-05	1.11186	3.76853	13.5579	0.000231319	0.00229538
2:1:16069890	Hypo	2H	16069890	1	0.845267	4.76958	18.8161	1.44e-05	0.000475941	1.04773	4.90969	27.6672	1.44e-07	7.54e-06	1.23607	5.13159	26.689	2.39e-07	1.13e-05
2:1:16134627	Hypo	2H	16134627	1	1.60754	2.43102	11.3727	0.000745307	0.00865573	1.63651	2.51294	13.4202	0.000248932	0.00291918	2.2793	2.84942	22.7597	1.84e-06	5.57e-05
2:1:16189436	Hypo	2H	16189436	1	1.0795	4.1803	24.1294	9.01e-07	5.78e-05	1.19899	4.27593	27.8203	1.33e-07	7.09e-06	1.04432	4.31642	12.1587	0.0004886	0.00402338
2:1:17206316	Hypo	2H	17206316	1	0.545434	5.52183	13.4027	0.000251261	0.00396079	0.714415	5.64044	18.1651	2.03e-05	0.000405772	0.595556	5.71365	10.1785	0.00142091	0.00900569
2:1:17213624	Hypo	2H	17213624	1	0.844513	4.52257	18.0472	2.15e-05	0.00064515	1.10527	4.6945	25.7387	3.91e-07	1.7e-05	1.1739	4.83616	24.9449	5.9e-07	2.29e-05
2:1:17492680	Hyper	2H	17492680	1	-0.637359	4.69432	11.5901	0.000663038	0.0079781	-0.882473	4.63409	18.3059	1.88e-05	0.000382367	-1.72427	4.76579	45.3375	1.66e-11	6.52e-09
2:1:17499146	Hyper	2H	17499146	1	-0.436239	6.24524	12.0061	0.000530278	0.00680277	-0.477257	6.24484	11.3658	0.000748097	0.00670843	-0.706645	6.42492	16.182	5.75e-05	0.000799089
2:1:18148106	Hypo	2H	18148106	1	1.12251	3.88214	23.1286	1.52e-06	8.5e-05	1.39006	4.05915	32.6872	1.08e-08	8.74e-07	1.06265	4.0041	11.9178	0.000555998	0.00444304
2:1:18281009	Hypo	2H	18281009	1	0.770344	4.47434	11.8217	0.00058544	0.00730918	1.25266	4.78055	31.7878	1.72e-08	1.29e-06	1.016	4.75537	11.9021	0.00056071	0.00446947
2:1:19869870	Hypo	2H	19869870	1	1.1448	3.04086	12.6001	0.000385723	0.00539736	1.58982	3.29006	32.9269	9.57e-09	7.89e-07	1.70573	3.44194	22.419	2.19e-06	6.38e-05
2:1:19919589	Hyper	2H	19919589	1	-1.08914	3.00527	16.6771	4.43e-05	0.00109711	-0.951891	3.08508	11.2505	0.000796034	0.00703767	-1.36807	3.29596	15.7997	7.04e-05	0.000932737
2:1:20259684	Hypo	2H	20259684	1	1.43673	3.38139	20.9825	4.64e-06	0.000203713	1.62219	3.50954	28.486	9.44e-08	5.35e-06	1.83526	3.70114	35.3026	2.82e-09	3.56e-07
2:1:22213160	Hypo	2H	22213160	1	1.59353	2.74392	20.5663	5.76e-06	0.000241576	1.21572	2.65646	12.22	0.000472809	0.00475118	2.29461	3.21015	23.7294	1.11e-06	3.76e-05
2:1:22659101	Hypo	2H	22659101	1	1.37535	2.83805	15.2106	9.62e-05	0.00196222	1.45378	2.91818	15.8824	6.74e-05	0.00104178	1.42918	3.0282	9.99758	0.00156746	0.00971108
2:1:22765639	Hypo	2H	22765639	1	1.52235	4.12918	39.8619	2.73e-10	1.16e-07	1.66971	4.24356	44.1385	3.06e-11	7.44e-09	1.78433	4.38442	37.6124	8.63e-10	1.39e-07
2:1:22895390	Hypo	2H	22895390	1	0.767358	4.73954	15.5294	8.12e-05	0.00173954	0.845056	4.79884	21.7012	3.19e-06	9.41e-05	1.49754	5.31389	23.6202	1.17e-06	3.94e-05
2:1:24809622	Hypo	2H	24809622	1	0.815807	3.3723	11.1303	0.000849306	0.00950563	1.51728	3.76769	35.0334	3.24e-09	3.31e-07	1.61095	3.90369	29.9261	4.49e-08	3.05e-06
2:1:24852991	Hypo	2H	24852991	1	1.12481	4.58087	33.4794	7.2e-09	1.37e-06	1.21842	4.65775	29.1798	6.6e-08	3.97e-06	1.01655	4.65756	12.7788	0.000350562	0.00313341
2:1:26603382	Hypo	2H	26603382	1	1.32747	3.18503	20.5407	5.84e-06	0.00024388	1.46861	3.29088	24.3623	7.98e-07	3.04e-05	1.82926	3.57635	25.5113	4.4e-07	1.83e-05
2:1:27145145	Hypo	2H	27145145	1	0.964966	4.47575	24.0715	9.28e-07	5.92e-05	0.882583	4.4497	19.1246	1.22e-05	0.0002729	0.844227	4.56058	12.5601	0.000394078	0.00342162
2:1:27153263	Hypo	2H	27153263	1	1.00944	3.21238	13.06	0.000301664	0.00451219	1.56034	3.51309	31.5382	1.96e-08	1.44e-06	1.20223	3.45634	11.3047	0.000773093	0.00569091
2:1:27179522	Hypo	2H	27179522	1	1.56072	2.70024	19.122	1.23e-05	0.000421722	1.66353	2.79181	17.2189	3.33e-05	0.000602775	1.57644	2.87533	13.991	0.000183686	0.00192611
2:1:27238616	Hypo	2H	27238616	1	1.12987	2.91474	12.8901	0.000330322	0.00483039	1.2523	3.01546	13.9506	0.000187677	0.00234641	1.56963	3.25596	23.1568	1.49e-06	4.75e-05
2:1:27439627	Hypo	2H	27439627	1	1.27613	4.64021	37.1921	1.07e-09	3.23e-07	1.44316	4.75971	54.1128	1.89e-13	1.35e-10	1.11169	4.6619	23.5632	1.21e-06	4.04e-05
2:1:27539583	Hypo	2H	27539583	1	0.915953	3.35991	12.7394	0.000358028	0.00512355	1.23269	3.54587	24.6658	6.82e-07	2.69e-05	1.1611	3.63055	14.5445	0.000136887	0.00154131
2:1:27689975	Hypo	2H	27689975	1	1.27069	4.33539	23.2275	1.44e-06	8.19e-05	1.48081	4.47879	45.2529	1.73e-11	4.66e-09	1.36761	4.49809	36.6847	1.39e-09	2.04e-07
2:1:27696138	Hypo	2H	27696138	1	1.47122	4.34395	40.1183	2.39e-10	1.05e-07	1.62867	4.46017	47.5588	5.34e-12	1.81e-09	1.59824	4.51352	38.6382	5.1e-10	9.24e-08
2:1:27816043	Hyper	2H	27816043	1	-0.640926	7.43862	21.7762	3.06e-06	0.000147983	-0.795748	7.39258	28.432	9.7e-08	5.48e-06	-1.32893	7.54459	45.3267	1.67e-11	6.53e-09
2:1:27967556	Hypo	2H	27967556	1	0.797211	7.27428	19.87	8.29e-06	0.000317031	0.991067	7.42174	29.0834	6.93e-08	4.13e-06	1.10807	7.59942	24.2267	8.56e-07	3.08e-05
2:1:28346178	Hypo	2H	28346178	1	1.09286	5.41931	47.0365	6.97e-12	7.83e-09	1.17096	5.48727	45.7826	1.32e-11	3.75e-09	1.16822	5.58003	29.2107	6.49e-08	4.06e-06
2:1:28379591	Hypo	2H	28379591	1	1.30518	2.70516	13.2051	0.000279185	0.00426599	1.30951	2.75966	15.7545	7.21e-05	0.00109888	2.41124	3.34096	31.0926	2.46e-08	1.94e-06
2:1:29202837	Hypo	2H	29202837	1	1.76322	3.09964	40.266	2.22e-10	1e-07	1.87083	3.18941	38.2566	6.2e-10	8.52e-08	2.28308	3.49437	37.1472	1.1e-09	1.68e-07
2:1:30920500	Hypo	2H	30920500	1	1.97573	2.56478	24.8816	6.1e-07	4.29e-05	1.84701	2.57334	20.6452	5.53e-06	0.000145515	2.30216	2.86952	25.9967	3.42e-07	1.5e-05
2:1:37613055	Hypo	2H	37613055	1	0.72786	4.71229	15.4357	8.54e-05	0.00180329	0.787796	4.76042	16.7149	4.34e-05	0.000740899	0.916892	4.96022	19.5727	9.68e-06	0.000199948
2:1:37615797	Hypo	2H	37615797	1	1.44022	2.83545	14.4108	0.000146958	0.00266952	1.49332	2.90403	15.1258	0.000100582	0.00143447	1.9383	3.19741	23.3708	1.34e-06	4.35e-05
2:1:38229456	Hypo	2H	38229456	1	0.668281	5.62188	25.3556	4.77e-07	3.57e-05	0.547497	5.56775	13.3815	0.000254118	0.0029657	0.753598	5.81393	18.7672	1.48e-05	0.000279549
2:1:38351448	Hypo	2H	38351448	1	1.21426	3.35809	20.2107	6.94e-06	0.000276852	1.69569	3.64146	34.6958	3.85e-09	3.79e-07	1.69284	3.72916	25.1763	5.23e-07	2.09e-05
2:1:38371461	Hypo	2H	38371461	1	1.09246	4.61715	32.589	1.14e-08	1.99e-06	1.30905	4.76952	42.0667	8.82e-11	1.73e-08	1.40917	4.9151	41.4983	1.18e-10	2.99e-08
2:1:40057733	Hypo	2H	40057733	1	1.10913	3.68459	18.7508	1.49e-05	0.000488137	1.24944	3.78427	26.0101	3.4e-07	1.52e-05	1.29888	3.92081	19.3848	1.07e-05	0.000216017
2:1:40095429	Hypo	2H	40095429	1	1.34503	3.53602	25.5116	4.4e-07	3.36e-05	1.72349	3.76985	33.2472	8.12e-09	6.91e-07	1.59405	3.79017	24.4477	7.64e-07	2.81e-05
2:1:40293446	Hypo	2H	40293446	1	1.30841	3.23877	18.1797	2.01e-05	0.000612367	1.65671	3.45294	29.4231	5.82e-08	3.59e-06	1.81121	3.617	23.1956	1.46e-06	4.68e-05
2:1:40335169	Hypo	2H	40335169	1	1.09431	4.94434	37.5962	8.7e-10	2.79e-07	1.28449	5.07942	50.6169	1.12e-12	5.16e-10	0.917658	4.97413	15.5173	8.18e-05	0.00103984
2:1:40397799	Hypo	2H	40397799	1	1.07551	3.57887	18.9591	1.34e-05	0.000451225	1.28969	3.7165	28.1843	1.1e-07	6.08e-06	1.29476	3.82731	21.2365	4.06e-06	0.00010171
2:1:40476742	Hyper	2H	40476742	1	-0.875418	3.32567	11.2601	0.000791914	0.00905219	-1.10122	3.33238	15.7798	7.12e-05	0.00108815	-1.67883	3.51942	23.2918	1.39e-06	4.51e-05
2:1:40476857	Hypo	2H	40476857	1	0.808687	6.92738	21.9275	2.83e-06	0.000139077	0.943186	7.03715	27.4417	1.62e-07	8.3e-06	1.57306	7.53559	47.6128	5.19e-12	2.64e-09
2:1:40602631	Hypo	2H	40602631	1	0.675871	4.74892	15.2541	9.4e-05	0.00193339	0.99425	4.9527	29.8866	4.58e-08	2.95e-06	1.15385	5.1466	32.1065	1.46e-08	1.27e-06
2:1:41489770	Hypo	2H	41489770	1	1.05081	5.18582	38.9927	4.25e-10	1.62e-07	1.19233	5.29288	37.9709	7.18e-10	9.52e-08	1.01147	5.28274	19.6446	9.33e-06	0.000194234
2:1:42550433	Hypo	2H	42550433	1	0.986863	3.32046	13.066	0.000300711	0.00450415	0.995227	3.36737	11.5072	0.000693266	0.0063336	1.53396	3.7512	20.5272	5.88e-06	0.000135054
2:1:45889273	Hypo	2H	45889273	1	1.24214	3.72291	24.5454	7.26e-07	4.87e-05	1.58284	3.94052	38.25	6.22e-10	8.52e-08	1.73083	4.09809	36.2529	1.73e-09	2.47e-07
2:1:45951869	Hypo	2H	45951869	1	1.01787	3.92752	14.5455	0.000136812	0.0025349	1.25539	4.08581	27.9814	1.22e-07	6.61e-06	1.55382	4.34944	29.5945	5.33e-08	3.5e-06
2:1:46102299	Hypo	2H	46102299	1	1.32552	5.34649	64.1234	1.17e-15	1.26e-11	1.46968	5.46403	69.8846	6.29e-17	4.31e-13	1.55554	5.58402	59.9157	9.9e-15	1.99e-11
2:1:46196307	Hyper	2H	46196307	1	-1.49885	4.22457	34.0584	5.35e-09	1.1e-06	-1.17291	4.33008	20.1137	7.3e-06	0.00018184	-1.9393	4.52369	34.0819	5.28e-09	5.78e-07
2:1:47187134	Hypo	2H	47187134	1	0.986035	3.63402	16.4856	4.9e-05	0.0011806	1.00609	3.67501	14.2574	0.000159433	0.00206637	1.1278	3.8544	16.7043	4.37e-05	0.000649187
2:1:47207669	Hypo	2H	47207669	1	0.824413	4.62134	22.4723	2.13e-06	0.000111382	0.747483	4.59943	15.1311	0.000100299	0.00143166	1.05295	4.88841	25.3396	4.81e-07	1.96e-05
2:1:47426722	Hypo	2H	47426722	1	1.47596	4.49182	46.4845	9.23e-12	9.74e-09	1.70976	4.66826	52.2661	4.85e-13	2.77e-10	1.48553	4.60023	32.1621	1.42e-08	1.24e-06
2:1:47636776	Hyper	2H	47636776	1	-0.884258	3.88568	13.5294	0.000234859	0.00376555	-0.917013	3.92117	18.451	1.74e-05	0.000359221	-1.21181	4.13782	21.1765	4.19e-06	0.000104206
2:1:47693999	Hyper	2H	47693999	1	-0.714375	4.8638	22.3356	2.29e-06	0.000117787	-0.592069	4.9242	14.4561	0.000143462	0.00190121	-0.8046	5.13467	17.937	2.28e-05	0.000392548
2:1:47800745	Hyper	2H	47800745	1	-0.952764	5.70403	25.0025	5.73e-07	4.08e-05	-0.772562	5.77344	13.3553	0.000257694	0.00299822	-1.3882	5.92285	36.2447	1.74e-09	2.47e-07
2:1:47801767	Hyper	2H	47801767	1	-0.907668	3.49446	13.2068	0.000278935	0.00426326	-0.882201	3.54301	11.8417	0.000579193	0.0055266	-1.23392	3.75682	14.7775	0.000120973	0.0014026
2:1:47810282	Hyper	2H	47810282	1	-0.998841	5.22628	34.6879	3.87e-09	8.73e-07	-0.996353	5.24348	25.9974	3.42e-07	1.53e-05	-0.911162	5.55662	16.3578	5.24e-05	0.000744846
2:1:47946419	Hypo	2H	47946419	1	1.83464	2.6308	24.3574	8e-07	5.27e-05	1.71472	2.61735	24.0208	9.53e-07	3.52e-05	2.18394	2.92548	30.5087	3.32e-08	2.44e-06
2:1:50260936	Hypo	2H	50260936	1	1.25592	3.06171	17.1984	3.37e-05	0.000896892	1.78558	3.36094	41.4427	1.21e-10	2.22e-08	1.57116	3.35198	17.6063	2.72e-05	0.00045066
2:1:53353619	Hypo	2H	53353619	1	2.2011	2.71988	33.4368	7.36e-09	1.4e-06	1.88739	2.64929	18.9979	1.31e-05	0.00028726	2.04492	2.82208	16.7574	4.25e-05	0.000634909
2:1:56198171	Hypo	2H	56198171	1	1.42235	3.8151	33.1777	8.41e-09	1.54e-06	1.84845	4.09965	63.9221	1.29e-15	3.07e-12	1.99761	4.24488	44.4587	2.6e-11	9.03e-09
2:1:57812569	Hypo	2H	57812569	1	1.31123	5.06687	34.0015	5.51e-09	1.12e-06	1.43412	5.16506	41.003	1.52e-10	2.67e-08	2.10258	5.67805	68.8829	1.04e-16	6.88e-13
2:1:59512624	Hyper	2H	59512624	1	-0.930643	2.78817	12.0694	0.000512566	0.00663489	-1.07117	2.83383	13.7008	0.000214366	0.00260443	-1.26888	3.05125	12.8881	0.000330672	0.00300053
2:1:59730800	Hypo	2H	59730800	1	1.0281	3.70172	15.5153	8.18e-05	0.0017493	1.24641	3.84895	29.0755	6.96e-08	4.14e-06	1.22223	3.9374	22.0736	2.62e-06	7.29e-05
2:1:59898598	Hypo	2H	59898598	1	1.63922	2.85911	20.9248	4.78e-06	0.000208702	1.66107	2.90845	23.6242	1.17e-06	4.16e-05	2.02808	3.17021	28.72	8.36e-08	4.99e-06
2:1:61022104	Hyper	2H	61022104	1	-1.44581	2.6936	15.8516	6.85e-05	0.00152987	-1.74442	2.73054	20.3277	6.52e-06	0.000165819	-1.59434	3.01969	12.6687	0.000371831	0.0032784
2:1:61104102	Hypo	2H	61104102	1	1.31711	2.36999	12.2009	0.000477668	0.00631428	1.65058	2.53241	17.5856	2.75e-05	0.000518205	2.06277	2.78442	21.9289	2.83e-06	7.7e-05
2:1:61988961	Hypo	2H	61988961	1	1.31259	3.39363	21.7458	3.11e-06	0.000149757	1.64055	3.59101	39.675	3e-10	4.64e-08	1.76464	3.74424	32.5482	1.16e-08	1.07e-06
2:1:62471013	Hypo	2H	62471013	1	0.921209	4.14756	19.0013	1.31e-05	0.000443772	0.877142	4.15486	12.5314	0.000400159	0.00419082	1.11004	4.39279	18.1847	2e-05	0.000354738
2:1:62494218	Hypo	2H	62494218	1	1.14886	4.23986	19.4393	1.04e-05	0.000374567	1.73581	4.62858	40.1952	2.3e-10	3.71e-08	1.56074	4.58583	28.9709	7.35e-08	4.5e-06
2:1:64369208	Hypo	2H	64369208	1	1.58409	3.26214	23.4188	1.3e-06	7.6e-05	1.64015	3.318	28.9259	7.52e-08	4.43e-06	2.27015	3.73801	40.5527	1.91e-10	4.35e-08
2:1:71113244	Hypo	2H	71113244	1	1.17799	5.62044	64.4106	1.01e-15	1.2e-11	1.13555	5.61038	48.6882	3e-12	1.16e-09	1.30117	5.80565	49.8124	1.69e-12	1.07e-09
2:1:71563554	Hypo	2H	71563554	1	1.53641	3.39495	32.2067	1.39e-08	2.28e-06	1.53779	3.42409	27.848	1.31e-07	7.01e-06	1.38974	3.4561	15.3229	9.06e-05	0.00112383
2:1:71697977	Hypo	2H	71697977	1	1.1233	4.27159	26.6788	2.4e-07	2.11e-05	1.44544	4.49308	41.7401	1.04e-10	1.97e-08	1.40535	4.55822	25.6007	4.2e-07	1.76e-05
2:1:71777880	Hypo	2H	71777880	1	2.71571	3.10191	47.2654	6.2e-12	7.24e-09	2.37459	2.96785	34.9633	3.36e-09	3.4e-07	2.11329	2.93128	21.1381	4.27e-06	0.000105959
2:1:71793684	Hypo	2H	71793684	1	1.30457	4.32012	31.1367	2.4e-08	3.49e-06	1.61966	4.53539	53.5449	2.53e-13	1.66e-10	1.51967	4.55952	30.187	3.92e-08	2.74e-06
2:1:72161286	Hypo	2H	72161286	1	1.54353	3.69372	37.1553	1.09e-09	3.25e-07	1.6489	3.79238	33.0547	8.96e-09	7.48e-07	1.99909	4.05954	37.9432	7.28e-10	1.22e-07
2:1:72688878	Hypo	2H	72688878	1	1.56794	3.0061	21.3944	3.74e-06	0.000172133	1.15603	2.87291	10.981	0.000920505	0.00786035	1.53253	3.14183	13.1264	0.000291157	0.00272792
2:1:73743302	Hypo	2H	73743302	1	1.78363	2.54963	17.9532	2.26e-05	0.000667886	1.76161	2.59426	18.5488	1.66e-05	0.000345398	2.53352	3.02203	26.5077	2.62e-07	1.21e-05
2:1:74475084	Hypo	2H	74475084	1	0.650476	6.53729	12.5165	0.000403382	0.00557556	0.83075	6.67197	18.6548	1.57e-05	0.000331328	0.827684	6.78814	13.0709	0.000299917	0.00278969
2:1:75260318	Hypo	2H	75260318	1	1.07448	3.63665	17.3297	3.14e-05	0.000853235	1.2158	3.73686	23.2336	1.43e-06	4.93e-05	1.51981	3.99517	24.8101	6.33e-07	2.42e-05
2:1:75539245	Hypo	2H	75539245	1	0.938158	4.49663	15.7772	7.13e-05	0.0015758	1.07237	4.60289	19.8666	8.3e-06	0.000201589	1.38578	4.87794	23.2568	1.42e-06	4.57e-05
2:1:78747815	Hyper	2H	78747815	1	-1.00233	2.79028	11.5647	0.000672148	0.00805191	-1.21529	2.82183	14.6638	0.000128494	0.00174426	-1.34262	3.06975	12.8794	0.000332213	0.00301111
2:1:80285219	Hypo	2H	80285219	1	1.17689	2.88178	12.9825	0.000314411	0.00465432	1.2195	2.94391	16.5392	4.77e-05	0.000795708	1.61865	3.22142	22.9729	1.64e-06	5.1e-05
2:1:80682669	Hypo	2H	80682669	1	1.08131	4.55793	35.909	2.07e-09	5.34e-07	1.14652	4.61295	35.7222	2.28e-09	2.46e-07	1.54024	4.93321	57.4724	3.43e-14	5.64e-11
2:1:82409408	Hypo	2H	82409408	1	1.55084	4.69592	37.6669	8.39e-10	2.73e-07	1.62872	4.76846	48.4346	3.41e-12	1.28e-09	1.63076	4.8334	36.2857	1.7e-09	2.44e-07
2:1:82464293	Hypo	2H	82464293	1	1.17226	3.49033	18.6829	1.54e-05	0.000500361	1.45707	3.66704	32.1464	1.43e-08	1.1e-06	2.06703	4.08557	37.6744	8.36e-10	1.35e-07
2:1:82524417	Hypo	2H	82524417	1	1.01485	4.94044	30.7555	2.93e-08	4.07e-06	1.02925	4.96792	26.4391	2.72e-07	1.27e-05	0.813358	4.96011	11.8633	0.00057252	0.00454343
2:1:82726188	Hypo	2H	82726188	1	1.17818	4.08539	13.9297	0.000189772	0.00321864	1.36041	4.22005	20.5507	5.81e-06	0.00015134	1.26221	4.24708	14.3263	0.000153701	0.00168147
2:1:83072087	Hyper	2H	83072087	1	-1.24584	4.72198	49.0153	2.54e-12	3.6e-09	-1.27945	4.74481	36.5238	1.51e-09	1.76e-07	-1.645	4.99106	52.9106	3.49e-13	3.05e-10
2:1:84031954	Hypo	2H	84031954	1	0.867069	4.62156	26.1351	3.18e-07	2.62e-05	0.966074	4.7059	27.0023	2.03e-07	1e-05	1.25808	4.97339	39.4009	3.45e-10	6.88e-08
2:1:87523414	Hypo	2H	87523414	1	1.52552	2.85969	16.6327	4.54e-05	0.0011149	1.79316	3.02287	24.5251	7.33e-07	2.84e-05	2.02169	3.25482	19.0903	1.25e-05	0.000244636
2:1:87566137	Hyper	2H	87566137	1	-1.21171	2.57161	11.3882	0.000739107	0.0086068	-1.31177	2.63346	11.0631	0.00088062	0.0076053	-1.46509	2.88058	10.1242	0.00146333	0.00921296
2:1:87583017	Hypo	2H	87583017	1	1.24086	3.20989	13.4015	0.000251418	0.00396223	1.35853	3.29579	22.9063	1.7e-06	5.68e-05	1.12958	3.32352	11.0124	0.000905023	0.00639284
2:1:88397412	Hypo	2H	88397412	1	1.37561	2.89095	19.8518	8.37e-06	0.000319861	1.65073	3.06551	23.8285	1.05e-06	3.8e-05	1.71824	3.21851	16.577	4.67e-05	0.000681761
2:1:88398143	Hypo	2H	88398143	1	0.677518	5.63599	23.6413	1.16e-06	7e-05	0.694411	5.66064	20.4182	6.22e-06	0.000159621	0.660468	5.77524	11.4209	0.000726229	0.00544605
2:1:88797824	Hypo	2H	88797824	1	1.2765	3.47953	23.3021	1.38e-06	7.97e-05	1.82439	3.82063	43.9121	3.43e-11	8.24e-09	1.97906	3.97467	38.4082	5.74e-10	1.01e-07
2:1:88865784	Hypo	2H	88865784	1	0.982862	5.15145	27.9464	1.25e-07	1.27e-05	0.969833	5.16429	22.7921	1.81e-06	5.96e-05	0.868348	5.22118	14.4097	0.00014704	0.0016245
2:1:88884119	Hyper	2H	88884119	1	-1.35791	2.57616	20.0362	7.6e-06	0.000296941	-1.27029	2.66577	16.1859	5.74e-05	0.000918758	-1.54981	2.88898	14.9449	0.000110697	0.00131057
2:1:88961558	Hypo	2H	88961558	1	1.09474	5.13809	29.259	6.33e-08	7.55e-06	1.28311	5.28608	37.554	8.89e-10	1.12e-07	1.10073	5.26848	19.8184	8.52e-06	0.000180299
2:1:90369246	Hypo	2H	90369246	1	0.898608	3.42255	11.7476	0.000609218	0.00751973	1.08791	3.54744	18.1694	2.02e-05	0.00040498	1.54439	3.87721	31.3027	2.21e-08	1.78e-06
2:1:91131811	Hypo	2H	91131811	1	1.53391	2.50074	12.8177	0.000343358	0.00496131	1.86269	2.68004	29.3678	5.99e-08	3.67e-06	2.01566	2.83879	22.1681	2.5e-06	7.02e-05
2:1:91442943	Hypo	2H	91442943	1	1.34932	3.30592	22.2083	2.45e-06	0.000124304	1.5651	3.44792	31.734	1.77e-08	1.33e-06	2.01497	3.76644	44.8219	2.16e-11	7.95e-09
2:1:95692622	Hyper	2H	95692622	1	-0.389513	8.79752	13.1724	0.000284097	0.00432246	-0.48979	8.76017	18.3295	1.86e-05	0.000378721	-0.956718	8.88432	30.3847	3.54e-08	2.56e-06
2:1:98419398	Hypo	2H	98419398	1	0.821826	4.6178	17.2712	3.24e-05	0.00087197	1.33133	4.94733	44.55	2.48e-11	6.31e-09	1.09508	4.90434	22.642	1.95e-06	5.84e-05
2:1:98505065	Hypo	2H	98505065	1	1.58232	3.01867	15.9993	6.34e-05	0.00144227	1.50361	3.01625	17.0031	3.73e-05	0.000659067	1.63754	3.19364	13.3807	0.000254231	0.00246008
2:1:98546147	Hypo	2H	98546147	1	1.28952	3.10454	16.68	4.42e-05	0.00109591	1.49387	3.22839	27.548	1.53e-07	7.94e-06	1.80901	3.48945	27.9792	1.23e-07	6.79e-06
2:1:98905546	Hypo	2H	98905546	1	0.983527	4.68803	28.0307	1.19e-07	1.23e-05	1.01744	4.72593	24.4529	7.61e-07	2.92e-05	1.23514	4.9556	28.4614	9.56e-08	5.57e-06
2:1:100762369	Hyper	2H	100762369	1	-1.18492	3.33287	23.258	1.42e-06	8.1e-05	-1.24236	3.3725	22.1997	2.46e-06	7.64e-05	-1.19916	3.66884	15.1721	9.81e-05	0.00119563
2:1:105897927	Hypo	2H	105897927	1	1.01706	2.85768	11.379	0.000742788	0.00863321	1.16833	2.96584	13.1331	0.000290122	0.00328275	1.33358	3.16229	13.9593	0.000186816	0.00195146
2:1:106030589	Hypo	2H	106030589	1	0.648302	4.82979	14.5344	0.000137625	0.00254678	0.861257	4.96816	20.993	4.61e-06	0.000126446	0.937803	5.12756	22.8191	1.78e-06	5.44e-05
2:1:106336687	Hypo	2H	106336687	1	1.36827	2.53965	11.3171	0.000767981	0.00885428	2.05231	2.86573	30.9289	2.68e-08	1.9e-06	2.05035	2.96363	28.8788	7.71e-08	4.68e-06
2:1:106506974	Hypo	2H	106506974	1	0.773518	7.01817	19.7296	8.92e-06	0.00033475	0.915374	7.13129	27.2198	1.82e-07	9.13e-06	1.1379	7.37426	27.3437	1.7e-07	8.67e-06
2:1:106618577	Hypo	2H	106618577	1	1.31523	2.92529	21.0775	4.41e-06	0.000196104	1.4862	3.03827	26.9691	2.07e-07	1.02e-05	1.21309	3.06543	10.4056	0.00125634	0.00819904
2:2:106620958	Hypo	2H	106620958	2	0.742013	6.46564	18.9061	1.37e-05	0.00046078	0.855567	6.55722	24.957	5.86e-07	2.37e-05	0.924765	6.71457	19.9199	8.08e-06	0.000173106
2:1:107452660	Hypo	2H	107452660	1	0.662608	5.82653	20.1918	7.01e-06	0.000278957	0.586378	5.79787	13.9468	0.000188062	0.00235021	0.737913	6.01725	15.151	9.92e-05	0.00120666
2:1:114070048	Hypo	2H	114070048	1	1.25031	3.73869	24.1667	8.83e-07	5.69e-05	1.52028	3.91919	39.5604	3.18e-10	4.85e-08	1.62529	4.05518	28.9132	7.57e-08	4.61e-06
2:1:114226951	Hypo	2H	114226951	1	1.71523	4.24963	54.6284	1.46e-13	3.85e-10	1.92921	4.40999	69.4008	8.04e-17	4.93e-13	1.88802	4.42745	41.0154	1.51e-10	3.62e-08
2:1:114378409	Hypo	2H	114378409	1	1.10752	3.19138	15.1041	0.000101741	0.0020431	1.2082	3.27717	15.6359	7.68e-05	0.00115223	1.32191	3.44175	18.3599	1.83e-05	0.000329833
2:1:114484157	Hypo	2H	114484157	1	1.15399	4.23969	28.8116	7.98e-08	9.09e-06	1.21559	4.30048	34.2784	4.78e-09	4.47e-07	1.11238	4.34468	18.602	1.61e-05	0.000298828
2:1:114670094	Hyper	2H	114670094	1	-0.681612	5.58699	14.5058	0.000139728	0.0025753	-0.788749	5.56097	16.5104	4.84e-05	0.000804881	-1.21675	5.74638	25.1499	5.3e-07	2.11e-05
2:1:115051018	Hypo	2H	115051018	1	1.3927	3.78363	26.6463	2.44e-07	2.13e-05	1.86456	4.09129	47.8546	4.59e-12	1.61e-09	1.73325	4.08348	35.1615	3.03e-09	3.77e-07
2:1:115316432	Hypo	2H	115316432	1	1.5394	3.00392	24.6064	7.03e-07	4.77e-05	1.27478	2.92832	16.0339	6.22e-05	0.000977979	1.51324	3.15121	15.5217	8.16e-05	0.00103768
2:1:116330387	Hyper	2H	116330387	1	-0.986557	3.4087	14.7906	0.000120134	0.00229885	-0.849576	3.49204	11.6058	0.000657473	0.00608462	-1.32091	3.68045	17.0058	3.73e-05	0.000573168
2:1:116441476	Hypo	2H	116441476	1	1.0167	3.47799	15.3429	8.97e-05	0.00186978	1.22535	3.61961	18.995	1.31e-05	0.000287525	1.66471	3.93657	34.1431	5.12e-09	5.65e-07
2:1:116589277	Hypo	2H	116589277	1	1.31366	2.5243	13.1699	0.000284479	0.00432579	1.87028	2.78978	28.2651	1.06e-07	5.86e-06	2.45222	3.1324	30.0417	4.23e-08	2.91e-06
2:1:116706067	Hypo	2H	116706067	1	1.13043	6.8619	44.8857	2.09e-11	1.75e-08	1.15763	6.90254	38.6217	5.14e-10	7.34e-08	0.857292	6.82167	15.9214	6.6e-05	0.00088847
2:1:116737841	Hyper	2H	116737841	1	-0.792253	3.79788	12.8863	0.00033099	0.00483839	-1.09257	3.75195	22.344	2.28e-06	7.19e-05	-1.6134	3.96468	28.0436	1.19e-07	6.61e-06
2:1:117963291	Hyper	2H	117963291	1	-1.1314	3.37875	19.6556	9.27e-06	0.000344388	-1.24512	3.40126	19.2793	1.13e-05	0.000256492	-1.28835	3.68415	17.3717	3.07e-05	0.000496262
2:1:120711726	Hyper	2H	120711726	1	-0.873824	4.33615	23.7903	1.07e-06	6.63e-05	-0.746523	4.42322	17.0588	3.62e-05	0.000644493	-0.960231	4.63773	17.3416	3.12e-05	0.000502146
2:1:134736147	Hyper	2H	134736147	1	-0.604814	7.89822	21.1391	4.27e-06	0.000191251	-0.604473	7.90445	18.8506	1.41e-05	0.000304804	-0.870149	8.09859	22.5208	2.08e-06	6.12e-05
2:1:142207584	Hypo	2H	142207584	1	1.44617	2.69064	13.6383	0.000221615	0.00360614	1.37035	2.71154	13.0447	0.000304149	0.00340285	1.99381	3.09966	17.6076	2.71e-05	0.000450503
2:1:142305172	Hypo	2H	142305172	1	1.29621	4.00588	34.3081	4.7e-09	1e-06	1.4584	4.12362	40.6298	1.84e-10	3.09e-08	1.48274	4.22341	30.9691	2.62e-08	2.04e-06
2:1:142643427	Hypo	2H	142643427	1	1.57969	2.52486	19.9081	8.13e-06	0.000312486	2.09369	2.79826	25.7997	3.79e-07	1.66e-05	1.87005	2.79989	22.46	2.15e-06	6.29e-05
2:1:142648242	Hypo	2H	142648242	1	1.84683	3.44578	42.7017	6.38e-11	3.93e-08	2.05641	3.59406	50.0303	1.51e-12	6.69e-10	2.27377	3.79145	46.1677	1.09e-11	4.74e-09
2:1:148968041	Hypo	2H	148968041	1	1.14223	7.41728	44.5377	2.5e-11	1.97e-08	1.15955	7.4528	39.7424	2.9e-10	4.5e-08	0.879528	7.38094	15.2035	9.65e-05	0.00118054
2:1:148968053	Hypo	2H	148968053	1	1.21888	10.1839	45.3569	1.64e-11	1.42e-08	1.26441	10.2417	50.1699	1.41e-12	6.28e-10	1.1244	10.2352	20.2393	6.83e-06	0.000151814
2:1:151117844	Hypo	2H	151117844	1	1.07332	4.5753	25.0701	5.53e-07	3.97e-05	1.27539	4.7285	25.5998	4.2e-07	1.81e-05	1.38313	4.88193	25.1403	5.33e-07	2.12e-05
2:1:152207021	Hypo	2H	152207021	1	1.38896	2.49588	11.6609	0.000638283	0.00776974	1.60349	2.63045	20.2487	6.8e-06	0.000171387	1.54743	2.73731	13.9531	0.000187429	0.00195601
2:1:159655308	Hypo	2H	159655308	1	0.772689	4.66006	14.4423	0.000144522	0.00263996	0.730357	4.65834	12.4654	0.000414559	0.00430098	0.891105	4.87398	14.3895	0.000148626	0.00163744
2:1:161182567	Hypo	2H	161182567	1	1.33406	3.00508	15.5164	8.18e-05	0.00174873	1.58141	3.15222	26.6852	2.39e-07	1.14e-05	1.59061	3.28064	16.9882	3.76e-05	0.000577535
2:1:161448535	Hypo	2H	161448535	1	0.848006	4.83963	21.0856	4.39e-06	0.000195423	1.1302	5.0315	37.3972	9.64e-10	1.19e-07	0.961936	5.05012	16.2573	5.53e-05	0.000774851
2:2:166816993	Hyper	2H	166816993	2	-0.479504	6.8361	19.4884	1.01e-05	0.00036707	-0.492615	6.84352	15.4229	8.59e-05	0.0012632	-0.93946	6.96779	30.2693	3.76e-08	2.66e-06
2:1:174814965	Hyper	2H	174814965	1	-0.767468	8.58119	22.4103	2.2e-06	0.000114232	-1.0712	8.49731	36.4804	1.54e-09	1.79e-07	-1.24782	8.74855	26.1543	3.15e-07	1.41e-05
2:1:177616279	Hyper	2H	177616279	1	-1.16584	2.67019	11.1255	0.000851505	0.00952487	-1.26651	2.73841	11.2517	0.000795518	0.00703364	-1.61149	2.95678	11.8444	0.000578358	0.00458387
2:1:187003021	Hypo	2H	187003021	1	1.22394	4.43202	29.6501	5.18e-08	6.48e-06	1.49914	4.62035	49.2877	2.21e-12	9.13e-10	1.64128	4.78955	32.7121	1.07e-08	9.98e-07
2:1:234096028	Hypo	2H	234096028	1	0.708779	5.63841	17.4187	3e-05	0.000824095	0.811132	5.72048	22.1966	2.46e-06	7.65e-05	1.08645	5.99388	24.6694	6.81e-07	2.56e-05
2:1:240274051	Hypo	2H	240274051	1	1.06031	4.94053	28.3945	9.89e-08	1.06e-05	1.24952	5.07344	37.1405	1.1e-09	1.33e-07	1.27192	5.18233	30.3533	3.6e-08	2.58e-06
2:1:246330506	Hypo	2H	246330506	1	1.04234	2.99855	14.3314	0.000153284	0.0027552	1.09743	3.06221	14.8193	0.000118318	0.00163253	1.8083	3.50639	21.7288	3.14e-06	8.38e-05
2:1:252579887	Hypo	2H	252579887	1	0.873342	3.62538	13.3073	0.000264374	0.00410339	1.05684	3.7435	14.3668	0.000150431	0.0019738	1.19137	3.92373	21.42	3.69e-06	9.45e-05
2:1:252585080	Hyper	2H	252585080	1	-1.3384	3.25113	33.2464	8.12e-09	1.5e-06	-1.20611	3.32974	23.1814	1.47e-06	5.05e-05	-1.18109	3.59828	17.4205	3e-05	0.000486801
2:1:252586815	Hyper	2H	252586815	1	-0.66227	8.02931	19.5535	9.78e-06	0.000357963	-0.751371	8.00948	26.2728	2.96e-07	1.36e-05	-0.915104	8.24196	24.6722	6.8e-07	2.56e-05
2:1:255640706	Hyper	2H	255640706	1	-0.433828	6.70543	15.7382	7.27e-05	0.00160327	-0.576084	6.65255	23.3825	1.33e-06	4.62e-05	-0.739109	6.87109	20.9188	4.79e-06	0.000115652
2:1:256198292	Hypo	2H	256198292	1	1.16527	3.64138	21.763	3.08e-06	0.000148644	1.08264	3.62235	18.4217	1.77e-05	0.000363626	1.19209	3.80023	15.4377	8.53e-05	0.00107336
2:1:258134451	Hyper	2H	258134451	1	-0.835657	4.74222	18.8603	1.41e-05	0.000468744	-0.748482	4.78582	13.2561	0.000271692	0.00312362	-1.20993	4.9666	21.0022	4.59e-06	0.000111895
2:1:260929782	Hyper	2H	260929782	1	-1.41524	4.70569	76.1286	2.66e-18	6.33e-14	-1.18695	4.80182	41.736	1.04e-10	1.97e-08	-1.45638	5.04946	47.2376	6.29e-12	3.01e-09
2:1:267821730	Hyper	2H	267821730	1	-1.37454	3.99912	21.443	3.64e-06	0.000168854	-1.16624	4.07791	15.8243	6.95e-05	0.00106778	-2.69914	4.20241	44.979	1.99e-11	7.48e-09
2:1:267823761	Hyper	2H	267823761	1	-0.840214	6.37971	24.9772	5.8e-07	4.12e-05	-1.00763	6.32471	37.4888	9.19e-10	1.15e-07	-1.0226	6.63515	25.2249	5.1e-07	2.05e-05
2:1:283294031	Hypo	2H	283294031	1	0.911287	4.90141	21.6731	3.23e-06	0.000154152	0.833018	4.87793	17.2603	3.26e-05	0.000592267	0.876227	5.02493	14.3298	0.000153415	0.00167937
2:1:290450283	Hyper	2H	290450283	1	-0.47995	7.4847	16.1529	5.84e-05	0.00135401	-0.503064	7.48423	17.2655	3.25e-05	0.000591082	-0.778632	7.66075	20.774	5.17e-06	0.000122723
2:1:292138459	Hyper	2H	292138459	1	-1.13077	3.50219	17.4931	2.88e-05	0.000801757	-0.89841	3.60037	11.3364	0.000760029	0.00679089	-1.7859	3.74373	26.9518	2.09e-07	1.02e-05
2:1:303196283	Hypo	2H	303196283	1	0.721368	9.0636	19.0882	1.25e-05	0.000427276	0.982692	9.25511	32.3971	1.26e-08	9.88e-07	0.971837	9.35748	18.4948	1.7e-05	0.00031272
2:1:305751730	Hypo	2H	305751730	1	0.767766	4.08684	14.2839	0.000157201	0.00280866	1.16408	4.32424	27.485	1.58e-07	8.17e-06	1.56573	4.6462	42.9748	5.54e-11	1.66e-08
2:1:306370327	Hypo	2H	306370327	1	0.860779	3.65465	13.0285	0.000306781	0.00456979	1.06886	3.78654	19.2255	1.16e-05	0.000262065	1.20377	3.97215	18.0418	2.16e-05	0.000376449
2:1:306626022	Hypo	2H	306626022	1	0.88176	5.09453	23.6241	1.17e-06	7.04e-05	0.797628	5.07131	14.1673	0.000167255	0.00214818	0.80885	5.20398	12.7588	0.00035433	0.00315908
2:1:309208442	Hypo	2H	309208442	1	1.35968	2.46135	14.3195	0.000154262	0.00276734	1.37753	2.53397	16.6928	4.39e-05	0.000747048	2.2847	2.9729	21.4549	3.62e-06	9.32e-05
2:1:327547220	Hyper	2H	327547220	1	-0.828303	5.04725	23.1954	1.46e-06	8.28e-05	-0.794961	5.07403	17.2222	3.33e-05	0.000602314	-1.56977	5.19725	45.2628	1.72e-11	6.64e-09
2:1:330185342	Hyper	2H	330185342	1	-1.35386	2.60383	14.4324	0.000145278	0.00265011	-1.63275	2.64512	18.2331	1.95e-05	0.000394792	-2.27511	2.87316	21.4743	3.59e-06	9.26e-05
2:1:339936664	Hypo	2H	339936664	1	1.07328	3.14652	15.1687	9.83e-05	0.00199288	1.52711	3.40149	29.7286	4.97e-08	3.14e-06	1.44543	3.47708	18.0942	2.1e-05	0.000368292
2:1:357980004	Hyper	2H	357980004	1	-1.65199	2.36229	17.9816	2.23e-05	0.000661378	-1.53298	2.46202	14.0331	0.00017962	0.00226951	-2.86591	2.64784	25.2357	5.07e-07	2.04e-05
2:1:357980023	Hyper	2H	357980023	1	-1.02089	3.64373	21.9285	2.83e-06	0.000139062	-0.753041	3.76019	11.3495	0.000754671	0.00675199	-1.60915	3.86698	30.3366	3.63e-08	2.59e-06
2:1:358691581	Hypo	2H	358691581	1	0.809217	3.75653	13.9231	0.000190443	0.00322772	0.974101	3.87009	15.3206	9.07e-05	0.00132018	1.0248	4.01766	17.0902	3.56e-05	0.000555128
2:1:361122737	Hypo	2H	361122737	1	1.00598	3.76545	19.5942	9.58e-06	0.000352116	0.870397	3.72784	10.8294	0.000999035	0.00836692	0.909189	3.87377	10.5711	0.00114871	0.00763957
2:1:364166148	Hypo	2H	364166148	1	1.2959	2.63004	12.8345	0.000340286	0.00492709	1.47995	2.75815	14.7278	0.000124203	0.00169746	1.76319	2.97678	16.595	4.63e-05	0.000677016
2:1:366766577	Hyper	2H	366766577	1	-0.871316	5.37644	24.9009	6.04e-07	4.25e-05	-0.859212	5.39428	21.3288	3.87e-06	0.000109853	-0.962804	5.65743	18.3313	1.86e-05	0.000333477
2:1:366863100	Hypo	2H	366863100	1	0.655564	3.86878	11.4261	0.000724184	0.0084874	0.82136	3.97835	15.0407	0.000105217	0.0014873	0.870656	4.1289	11.4144	0.000728754	0.0054598
2:2:367092994	Hypo	2H	367092994	2	1.08318	3.80757	24.0402	9.43e-07	5.98e-05	1.10695	3.84558	19.0655	1.26e-05	0.000279358	1.61045	4.21447	41.8995	9.61e-11	2.56e-08
2:1:368943493	Hypo	2H	368943493	1	0.853869	4.26721	19.6455	9.32e-06	0.000345998	1.34747	4.58169	38.9629	4.32e-10	6.29e-08	1.23074	4.61139	20.9105	4.81e-06	0.000115955
2:1:368950580	Hypo	2H	368950580	1	1.04902	3.53325	17.1085	3.53e-05	0.000930148	1.28346	3.69005	20.801	5.1e-06	0.000136892	1.45845	3.87581	25.2935	4.92e-07	1.99e-05
2:1:372377037	Hypo	2H	372377037	1	1.27264	3.28764	18.039	2.16e-05	0.000646759	1.20092	3.29064	18.4821	1.72e-05	0.000354779	1.41662	3.49155	17.5887	2.74e-05	0.000453725
2:1:373033941	Hypo	2H	373033941	1	0.783849	4.28325	11.1226	0.000852827	0.00953213	0.816992	4.32331	16.4556	4.98e-05	0.000823215	1.68416	4.94856	25.9518	3.5e-07	1.53e-05
2:1:374152794	Hypo	2H	374152794	1	1.89749	3.4458	39.6841	2.99e-10	1.25e-07	2.11046	3.59246	56.6597	5.18e-14	5.35e-11	1.95397	3.58369	30.2119	3.87e-08	2.71e-06
2:1:383388591	Hypo	2H	383388591	1	0.938736	3.62731	15.6182	7.75e-05	0.00168363	1.27744	3.82773	30.3212	3.66e-08	2.43e-06	1.17525	3.88995	15.014	0.000106718	0.00127722
2:1:383779016	Hyper	2H	383779016	1	-0.74473	4.68183	15.0077	0.000107075	0.00212054	-0.924444	4.65309	19.4393	1.04e-05	0.000240018	-1.80435	4.77436	56.3137	6.18e-14	8.24e-11
2:1:383837687	Hypo	2H	383837687	1	0.830518	5.45956	26.8227	2.23e-07	1.98e-05	0.829088	5.4806	19.8516	8.37e-06	0.000202709	0.735137	5.55915	11.8019	0.000591706	0.00465861
2:1:384009529	Hypo	2H	384009529	1	0.774447	4.51256	16.996	3.75e-05	0.000970814	1.04443	4.68932	25.256	5.02e-07	2.1e-05	0.927098	4.74236	14.8513	0.00011633	0.00136334
2:1:386511433	Hypo	2H	386511433	1	1.31594	2.66673	11.4341	0.000721086	0.00846109	1.46729	2.77429	18.659	1.56e-05	0.00033088	1.89036	3.07055	16.8089	4.13e-05	0.000621965
2:1:387581119	Hypo	2H	387581119	1	1.33099	3.70316	30.4953	3.35e-08	4.52e-06	1.53244	3.83777	38.8303	4.62e-10	6.7e-08	1.61187	3.97589	32.1443	1.43e-08	1.25e-06
2:1:387670288	Hyper	2H	387670288	1	-1.00902	3.63501	15.4099	8.65e-05	0.0018226	-1.02528	3.67898	16.3838	5.17e-05	0.000848016	-1.05089	3.95735	12.8263	0.000341783	0.00307274
2:1:387881259	Hyper	2H	387881259	1	-0.827821	4.61375	26.3559	2.84e-07	2.38e-05	-0.67798	4.68843	14.2247	0.00016223	0.00209406	-0.772927	4.91784	12.3067	0.000451327	0.00379196
2:1:387911519	Hypo	2H	387911519	1	1.02083	3.59216	12.299	0.000453209	0.00607184	1.21912	3.71651	25.4475	4.55e-07	1.94e-05	2.03639	4.30034	29.6857	5.08e-08	3.37e-06
2:1:388197790	Hypo	2H	388197790	1	1.22172	3.01645	15.7983	7.05e-05	0.00156152	1.40155	3.13971	22.1451	2.53e-06	7.81e-05	1.64812	3.34605	22.0212	2.7e-06	7.43e-05
2:1:389387358	Hypo	2H	389387358	1	1.05483	3.2047	15.5882	7.87e-05	0.00170065	1.2166	3.31629	18.8698	1.4e-05	0.000302474	1.22865	3.43877	15.0281	0.00010592	0.00126906
2:1:389549551	Hypo	2H	389549551	1	1.14415	3.70682	17.5207	2.84e-05	0.000793369	1.16503	3.74606	14.8693	0.000115225	0.00159799	1.43007	3.98295	20.1541	7.14e-06	0.00015757
2:1:389630171	Hypo	2H	389630171	1	1.39832	4.55143	49.9473	1.58e-12	2.47e-09	1.53991	4.6625	54.5113	1.55e-13	1.18e-10	1.55384	4.7454	36.6001	1.45e-09	2.12e-07
2:1:390158466	Hypo	2H	390158466	1	0.825954	4.71503	15.8405	6.89e-05	0.00153589	0.978091	4.82762	21.6469	3.28e-06	9.63e-05	0.890249	4.90239	12.0749	0.000511057	0.00416344
2:1:390370711	Hypo	2H	390370711	1	1.56593	2.58416	17.3745	3.07e-05	0.000838685	1.67397	2.67309	22.425	2.19e-06	6.94e-05	1.87149	2.87595	16.9059	3.93e-05	0.000597922
2:1:390523794	Hypo	2H	390523794	1	1.35082	2.87464	15.2092	9.62e-05	0.00196332	1.74666	3.09615	27.2854	1.76e-07	8.89e-06	1.54355	3.11596	15.3363	9e-05	0.00111786
2:1:390587309	Hypo	2H	390587309	1	1.42558	4.32767	43.8085	3.62e-11	2.57e-08	1.4343	4.34644	36.7837	1.32e-09	1.56e-07	1.28737	4.35016	24.6865	6.75e-07	2.54e-05
2:1:390633509	Hypo	2H	390633509	1	0.996711	3.51044	13.2764	0.000268769	0.00415483	1.25794	3.67092	25.8264	3.74e-07	1.64e-05	0.978107	3.66286	10.7071	0.00106724	0.00723671
2:1:391084201	Hypo	2H	391084201	1	1.33636	3.35298	24.3689	7.95e-07	5.24e-05	1.51327	3.47556	29.3835	5.94e-08	3.65e-06	1.82252	3.71694	36.2351	1.75e-09	2.48e-07
2:1:391166708	Hypo	2H	391166708	1	0.906532	4.60236	19.2676	1.14e-05	0.000399745	0.986634	4.66974	25.2714	4.98e-07	2.08e-05	1.11019	4.84513	26.0002	3.41e-07	1.5e-05
2:1:391427174	Hypo	2H	391427174	1	1.36814	2.71219	15.2779	9.28e-05	0.00191753	1.86773	2.9759	27.616	1.48e-07	7.7e-06	1.46484	2.92857	10.667	0.00109065	0.00735248
2:1:391851975	Hypo	2H	391851975	1	0.951954	3.56834	17.2513	3.27e-05	0.000879057	0.892321	3.57041	12.598	0.000386158	0.0040862	1.19422	3.83448	22.8961	1.71e-06	5.26e-05
2:1:391976616	Hypo	2H	391976616	1	0.827097	4.03099	13.9936	0.00018343	0.00314105	0.936956	4.11622	16.1635	5.81e-05	0.000928172	0.945974	4.24191	16.0485	6.17e-05	0.000844411
2:1:394341233	Hyper	2H	394341233	1	-0.838812	4.08933	20.736	5.27e-06	0.000225449	-0.661183	4.16422	13.7344	0.000210567	0.00256898	-0.747187	4.40812	10.6189	0.00111936	0.00750299
2:1:397321574	Hypo	2H	397321574	1	1.41186	2.6408	13.6742	0.000217422	0.00355823	1.37135	2.682	12.55	0.000396199	0.00416096	1.57287	2.87183	12.7156	0.000362616	0.00321438
2:1:402010226	Hypo	2H	402010226	1	0.670924	6.67903	21.8144	3e-06	0.000145362	0.683321	6.70273	17.6133	2.71e-05	0.000512071	0.972778	7.00103	16.7951	4.16e-05	0.00062546
2:1:407588659	Hyper	2H	407588659	1	-0.556985	7.84728	16.1566	5.83e-05	0.00135158	-0.604856	7.82673	15.1279	0.000100468	0.00143302	-0.811359	8.04685	17.0969	3.55e-05	0.000553576
2:1:408490872	Hypo	2H	408490872	1	1.57482	2.56655	15.8472	6.87e-05	0.0015316	1.2676	2.52423	10.653	0.00109892	0.00899273	2.43581	3.07022	27.0572	1.98e-07	9.73e-06
2:1:408724808	Hypo	2H	408724808	1	1.45185	2.79892	21.9374	2.82e-06	0.000138705	1.68483	2.94736	27.3499	1.7e-07	8.64e-06	2.07285	3.23947	30.5533	3.25e-08	2.4e-06
2:1:409455670	Hypo	2H	409455670	1	1.57941	2.87784	27.3322	1.71e-07	1.62e-05	1.45071	2.86656	17.9479	2.27e-05	0.000444493	1.62993	3.04781	20.3079	6.59e-06	0.000147704
2:1:410054694	Hypo	2H	410054694	1	1.61682	3.83402	33.5142	7.07e-09	1.36e-06	1.80491	3.96695	55.0905	1.15e-13	9.59e-11	1.83853	4.05075	41.6144	1.11e-10	2.87e-08
2:1:410252030	Hypo	2H	410252030	1	1.52862	2.97453	31.6278	1.87e-08	2.86e-06	1.27444	2.91043	17.768	2.5e-05	0.000478991	1.63646	3.18663	19.8937	8.19e-06	0.000175041
2:1:410896354	Hypo	2H	410896354	1	1.05373	4.45477	25.1668	5.26e-07	3.83e-05	1.01548	4.45038	25.4524	4.53e-07	1.93e-05	0.949131	4.5329	14.9754	0.000108922	0.00129651
2:1:411434392	Hypo	2H	411434392	1	1.26264	2.98127	12.9235	0.000324479	0.00476251	1.36814	3.06712	19.8071	8.57e-06	0.000206394	1.40912	3.21364	13.3507	0.000258333	0.00248912
2:1:411565279	Hypo	2H	411565279	1	1.06701	4.1284	17.1065	3.53e-05	0.000930952	1.02488	4.13175	15.2956	9.19e-05	0.00133409	1.1552	4.30579	14.8298	0.00011766	0.00137408
2:1:411968027	Hypo	2H	411968027	1	1.30562	3.5454	24.8487	6.2e-07	4.34e-05	1.31318	3.57737	22.3376	2.29e-06	7.21e-05	1.21456	3.63741	13.0772	0.000298904	0.00278385
2:1:412121094	Hyper	2H	412121094	1	-0.708011	4.21036	17.3335	3.14e-05	0.000851933	-0.655913	4.27325	12.9847	0.00031405	0.00349219	-0.835389	4.48079	13.933	0.000189446	0.00197289
2:1:412801685	Hypo	2H	412801685	1	0.601193	7.41914	17.6702	2.63e-05	0.000748299	0.772571	7.54476	20.8419	4.99e-06	0.00013437	0.770944	7.67075	16.439	5.02e-05	0.000721175
2:1:412801729	Hypo	2H	412801729	1	0.946203	4.64132	20.0775	7.44e-06	0.000292315	1.27517	4.86309	32.0225	1.52e-08	1.16e-06	1.22884	4.93216	24.4706	7.55e-07	2.78e-05
2:1:412801743	Hypo	2H	412801743	1	0.931031	5.82536	20.0552	7.52e-06	0.000294487	1.17075	6.00487	33.1745	8.42e-09	7.1e-07	1.46471	6.28013	25.3543	4.77e-07	1.95e-05
2:1:413278492	Hypo	2H	413278492	1	1.04146	11.9702	35.809	2.18e-09	5.57e-07	1.15548	12.0769	40.0125	2.52e-10	3.99e-08	1.10932	12.1332	17.8101	2.44e-05	0.000414143
2:1:413326734	Hyper	2H	413326734	1	-0.619775	4.43478	12.1908	0.000480258	0.00633865	-0.613513	4.4783	12.1451	0.000492179	0.0048969	-1.35942	4.57478	32.8135	1.01e-08	9.58e-07
2:1:413353442	Hypo	2H	413353442	1	1.21207	3.21413	18.8417	1.42e-05	0.000472006	1.26184	3.275	16.4711	4.94e-05	0.00081858	1.33844	3.42298	15.8968	6.69e-05	0.000897418
2:1:413359349	Hypo	2H	413359349	1	1.10692	3.78235	27.9437	1.25e-07	1.27e-05	1.34954	3.94351	35.8975	2.08e-09	2.28e-07	1.32399	4.01974	22.0619	2.64e-06	7.32e-05
2:1:414669620	Hypo	2H	414669620	1	0.60723	5.36097	17.3717	3.07e-05	0.000839537	0.686518	5.42879	17.9259	2.3e-05	0.000448825	0.725445	5.58569	15.1815	9.77e-05	0.00119143
2:1:414781153	Hypo	2H	414781153	1	1.17802	3.58056	22.0307	2.68e-06	0.000133503	1.18058	3.60648	19.8312	8.46e-06	0.000204286	1.00047	3.64227	11.559	0.000674214	0.00514569
2:1:414931781	Hypo	2H	414931781	1	0.914839	3.27181	15.4311	8.56e-05	0.00180635	1.63417	3.66396	52.4209	4.48e-13	2.63e-10	1.5203	3.68785	27.8634	1.3e-07	7.08e-06
2:1:417597159	Hypo	2H	417597159	1	1.25941	3.975	23.6411	1.16e-06	7e-05	1.39818	4.07805	29.7838	4.83e-08	3.09e-06	1.57926	4.26664	32.5153	1.18e-08	1.08e-06
2:1:417851556	Hypo	2H	417851556	1	1.33808	2.6213	11.2183	0.000809941	0.0091947	1.57185	2.76416	17.8702	2.37e-05	0.00045948	2.04817	3.055	19.8389	8.43e-06	0.000178741
2:1:418342089	Hypo	2H	418342089	1	0.735159	4.07859	12.5056	0.000405734	0.00559897	0.840911	4.15468	19.2009	1.18e-05	0.000264491	0.833759	4.28048	14.031	0.000179821	0.00189525
2:1:418625074	Hypo	2H	418625074	1	1.06741	3.68537	18.1359	2.06e-05	0.000623295	1.16221	3.76454	19.6797	9.16e-06	0.000217368	1.33575	3.95807	19.9765	7.84e-06	0.000169158
2:1:418637151	Hypo	2H	418637151	1	1.23151	4.21914	44.1352	3.06e-11	2.28e-08	1.27807	4.27172	31.2476	2.27e-08	1.64e-06	1.12122	4.28885	20.9503	4.71e-06	0.000114183
2:1:419095558	Hyper	2H	419095558	1	-1.25624	2.82995	18.9335	1.35e-05	0.000456145	-0.978113	2.9456	11.2178	0.000810176	0.00713404	-1.51291	3.12662	15.8618	6.81e-05	0.000909709
2:1:419642174	Hypo	2H	419642174	1	0.992299	3.09921	11.9112	0.000557983	0.00705931	1.52954	3.38478	33.0873	8.81e-09	7.38e-07	1.24782	3.38533	11.9602	0.000543478	0.00436489
2:1:420563651	Hypo	2H	420563651	1	1.20498	2.80399	14.951	0.000110342	0.00216187	1.31172	2.88793	16.625	4.55e-05	0.000768749	1.49427	3.06974	14.5373	0.000137411	0.00154457
2:1:421264895	Hyper	2H	421264895	1	-0.483988	5.28462	12.3156	0.000449184	0.00603359	-0.709306	5.21721	24.2751	8.35e-07	3.15e-05	-0.651622	5.50673	12.8909	0.000330175	0.00299843
2:1:421316893	Hypo	2H	421316893	1	0.941224	3.69114	13.1545	0.000286823	0.00435198	0.838667	3.66976	11.5349	0.00068302	0.00626354	1.23122	3.98206	16.0099	6.3e-05	0.000856639
2:1:421407821	Hyper	2H	421407821	1	-0.943888	3.56218	16.2728	5.48e-05	0.00128488	-0.869069	3.62434	13.7706	0.000206541	0.0025289	-1.06663	3.85652	13.1089	0.000293891	0.00274909
2:1:421682405	Hypo	2H	421682405	1	0.930651	3.79266	13.6954	0.000214984	0.00353019	1.18115	3.95589	19.2857	1.13e-05	0.000255855	1.19787	4.07189	17.035	3.67e-05	0.000566377
2:1:422021899	Hypo	2H	422021899	1	1.39037	2.73308	13.7728	0.000206301	0.00342148	1.61949	2.87474	18.936	1.35e-05	0.00029468	1.4825	2.93218	11.3384	0.0007592	0.00561502
2:1:423080554	Hyper	2H	423080554	1	-1.15621	2.70034	14.2524	0.000159855	0.0028434	-1.46523	2.72715	16.0316	6.23e-05	0.000978928	-1.81395	2.96019	18.3163	1.87e-05	0.00033531
2:1:423183351	Hypo	2H	423183351	1	1.66359	2.82279	20.9217	4.78e-06	0.000208898	1.75894	2.90084	28.8939	7.65e-08	4.49e-06	1.81542	3.03763	20.9215	4.78e-06	0.000115541
2:1:423500014	Hypo	2H	423500014	1	0.705793	4.87324	15.5251	8.14e-05	0.00174201	0.713383	4.89653	15.2853	9.24e-05	0.00133968	1.10663	5.23284	30.9725	2.62e-08	2.03e-06
2:1:423512131	Hypo	2H	423512131	1	1.06908	3.56053	17.4046	3.02e-05	0.000829163	1.15217	3.63256	22.139	2.54e-06	7.83e-05	1.68416	4.00878	33.123	8.65e-09	8.44e-07
2:1:423524178	Hypo	2H	423524178	1	1.38425	3.88022	32.1259	1.44e-08	2.35e-06	1.64877	4.0667	37.6694	8.38e-10	1.07e-07	1.40356	4.01352	19.7818	8.68e-06	0.000183295
2:1:423772971	Hypo	2H	423772971	1	1.29966	2.98184	17.7795	2.48e-05	0.000717488	1.51609	3.12226	22.8889	1.72e-06	5.72e-05	1.22745	3.1222	11.3473	0.000755596	0.00559591
2:1:424616983	Hypo	2H	424616983	1	1.1621	2.73623	11.8958	0.000562607	0.00710196	1.21031	2.80996	10.9122	0.000955308	0.00808697	1.28796	2.96896	11.15	0.000840316	0.0060526
2:1:424621133	Hypo	2H	424621133	1	1.19918	4.16102	22.2522	2.39e-06	0.000122173	1.59199	4.41574	46.9293	7.36e-12	2.34e-09	1.82433	4.63165	51.2504	8.13e-13	6.13e-10
2:1:424742812	Hypo	2H	424742812	1	1.20252	3.12668	18.6555	1.57e-05	0.000505221	1.6038	3.35187	28.3437	1.02e-07	5.68e-06	1.51203	3.41008	19.4853	1.01e-05	0.000207146
2:1:425106007	Hypo	2H	425106007	1	1.16577	2.80592	11.5582	0.000674497	0.00807356	1.70308	3.08708	25.1055	5.43e-07	2.23e-05	2.12762	3.39451	28.1084	1.15e-07	6.44e-06
2:1:425133686	Hypo	2H	425133686	1	1.22739	3.05331	14.833	0.000117462	0.00225899	1.68563	3.31734	28.7677	8.16e-08	4.75e-06	2.0794	3.6006	35.7754	2.21e-09	2.92e-07
2:1:425364775	Hypo	2H	425364775	1	0.892627	3.97593	11.58	0.000666659	0.00800764	0.902905	4.00845	10.9001	0.000961585	0.00812738	1.22016	4.28124	15.3072	9.14e-05	0.00113108
2:1:426117559	Hypo	2H	426117559	1	1.24853	2.82181	15.4401	8.52e-05	0.0018007	1.35406	2.90483	15.7373	7.28e-05	0.0011062	1.33302	3.01555	12.8858	0.000331077	0.0030033
2:1:426156978	Hyper	2H	426156978	1	-0.569449	5.33248	13.9206	0.000190694	0.00322984	-0.554787	5.35701	10.743	0.00104673	0.00867234	-0.878466	5.52224	17.0718	3.6e-05	0.000558659
2:1:426326574	Hypo	2H	426326574	1	1.05739	3.43282	18.7505	1.49e-05	0.000488137	1.21246	3.54436	21.825	2.99e-06	8.94e-05	1.08903	3.61724	11.7156	0.000619781	0.0048311
2:1:426999824	Hypo	2H	426999824	1	0.626829	6.24993	16.442	5.02e-05	0.00120049	0.812658	6.383	20.1787	7.05e-06	0.000176522	0.76483	6.48049	13.8831	0.000194537	0.00201421
2:1:427059037	Hypo	2H	427059037	1	1.18295	2.7038	12.7097	0.000363757	0.00518124	1.27889	2.78602	15.5445	8.06e-05	0.00119864	1.67825	3.07426	13.6836	0.00021634	0.00218364
2:1:427195257	Hypo	2H	427195257	1	1.68069	2.6215	24.7009	6.7e-07	4.59e-05	1.50056	2.61957	15.0559	0.000104374	0.00147807	2.35921	3.07344	29.2685	6.3e-08	3.98e-06
2:1:427468996	Hypo	2H	427468996	1	1.57482	3.0969	28.0203	1.2e-07	1.23e-05	1.39176	3.07161	15.5697	7.95e-05	0.00118538	1.44178	3.20246	14.2224	0.000162423	0.00175095
2:1:427513331	Hypo	2H	427513331	1	1.05392	3.56899	12.3312	0.000445452	0.00599422	1.51599	3.84722	30.4527	3.42e-08	2.3e-06	1.77493	4.07633	32.5039	1.19e-08	1.09e-06
2:1:427678028	Hypo	2H	427678028	1	1.06431	3.96732	25.3309	4.83e-07	3.6e-05	1.243	4.09173	25.1766	5.23e-07	2.17e-05	1.02132	4.08426	15.1356	0.000100057	0.00121399
2:1:428127456	Hypo	2H	428127456	1	1.18661	3.99862	27.2555	1.78e-07	1.67e-05	1.31058	4.09728	28.4509	9.61e-08	5.44e-06	1.46323	4.2699	28.8814	7.69e-08	4.68e-06
2:1:428287688	Hypo	2H	428287688	1	0.974351	3.83001	12.6187	0.000381898	0.00536002	1.09016	3.92966	15.707	7.4e-05	0.00111982	1.13039	4.05739	13.8722	0.000195674	0.00202365
2:1:429239820	Hypo	2H	429239820	1	0.878082	3.55343	14.4401	0.000144688	0.00264235	1.17948	3.73597	23.6515	1.15e-06	4.11e-05	1.1013	3.81418	16.5439	4.75e-05	0.000690598
2:1:429371007	Hypo	2H	429371007	1	1.00543	3.10657	11.4883	0.000700351	0.00828309	1.06146	3.16022	15.1129	0.000101271	0.001442	1.34756	3.41675	16.6856	4.41e-05	0.000654386
2:1:429409098	Hypo	2H	429409098	1	1.74091	2.72142	25.0265	5.65e-07	4.05e-05	1.86247	2.82306	27.0298	2e-07	9.89e-06	2.29917	3.11157	30.9266	2.68e-08	2.07e-06
2:1:429623617	Hypo	2H	429623617	1	1.78292	2.63605	21.5656	3.42e-06	0.000160785	1.85584	2.71061	21.0953	4.37e-06	0.000121225	2.12387	2.9263	18.53	1.67e-05	0.000308246
2:1:429701859	Hypo	2H	429701859	1	0.796159	4.04215	11.4982	0.000696625	0.00825132	0.942604	4.14969	17.1603	3.44e-05	0.000617734	1.30028	4.44414	29.2301	6.43e-08	4.04e-06
2:1:430085161	Hypo	2H	430085161	1	0.977145	3.49982	18.8978	1.38e-05	0.000462275	1.08769	3.57846	19.4714	1.02e-05	0.000237179	1.27304	3.78212	20.3103	6.58e-06	0.000147593
2:1:430436291	Hyper	2H	430436291	1	-1.05063	7.11855	77.0018	1.71e-18	5.08e-14	-0.980059	7.15713	60.0365	9.31e-15	1.39e-11	-1.17706	7.40311	47.0553	6.9e-12	3.24e-09
2:1:430470370	Hyper	2H	430470370	1	-0.782375	3.48666	13.5198	0.000236057	0.00377968	-1.14567	3.45313	24.4493	7.63e-07	2.93e-05	-1.12465	3.73281	16.8076	4.14e-05	0.000622225
2:1:430519189	Hypo	2H	430519189	1	1.35349	4.71484	46.5837	8.78e-12	9.5e-09	1.37542	4.74792	46.4602	9.35e-12	2.85e-09	1.27609	4.77443	26.0237	3.37e-07	1.49e-05
2:1:432629422	Hypo	2H	432629422	1	1.2518	2.81633	11.9059	0.000559549	0.00707461	1.21427	2.85321	12.1784	0.000483468	0.00483166	1.28673	3.00589	11.8039	0.000591075	0.00465661
2:1:433093366	Hypo	2H	433093366	1	1.28132	4.12777	31.9324	1.6e-08	2.54e-06	1.38322	4.20774	36.3282	1.67e-09	1.91e-07	1.67307	4.45914	41.0153	1.51e-10	3.62e-08
2:1:433373700	Hypo	2H	433373700	1	0.996438	4.77272	22.7452	1.85e-06	9.96e-05	1.23727	4.94164	40.1755	2.32e-10	3.74e-08	0.981646	4.89868	15.4183	8.62e-05	0.00108091
2:1:433386640	Hypo	2H	433386640	1	0.918659	3.66786	15.2252	9.54e-05	0.00195173	0.859289	3.65985	13.2104	0.000278401	0.00318294	1.64198	4.22673	15.9475	6.51e-05	0.000879307
2:1:433462808	Hypo	2H	433462808	1	1.0662	3.89164	12.8679	0.000334258	0.00486946	1.1821	3.9846	20.0755	7.44e-06	0.000184679	1.53572	4.26589	30.347	3.61e-08	2.58e-06
2:1:433536047	Hyper	2H	433536047	1	-1.44679	3.36432	32.8222	1.01e-08	1.79e-06	-1.25225	3.46731	23.1878	1.47e-06	5.04e-05	-1.81694	3.66846	29.9137	4.52e-08	3.07e-06
2:1:433536083	Hyper	2H	433536083	1	-1.05734	4.25524	26.5613	2.55e-07	2.2e-05	-1.16798	4.26639	29.4508	5.74e-08	3.54e-06	-1.21324	4.54482	24.1199	9.05e-07	3.22e-05
2:1:433824452	Hypo	2H	433824452	1	1.34888	3.00087	18.3342	1.85e-05	0.000577258	1.61176	3.1643	29.1576	6.67e-08	4e-06	1.71771	3.3071	21.8483	2.95e-06	7.96e-05
2:1:434411830	Hypo	2H	434411830	1	1.17004	4.00316	28.9294	7.51e-08	8.64e-06	1.62006	4.29545	53.4659	2.63e-13	1.69e-10	1.47046	4.28692	27.753	1.38e-07	7.38e-06
2:1:434653336	Hypo	2H	434653336	1	1.06314	3.05107	15.5002	8.25e-05	0.00175873	1.64724	3.37421	32.6485	1.1e-08	8.87e-07	1.25022	3.30404	14.312	0.000154873	0.00169079
2:1:434803058	Hypo	2H	434803058	1	1.38321	3.58068	28.2031	1.09e-07	1.15e-05	1.47768	3.66081	29.9098	4.53e-08	2.92e-06	1.51721	3.79244	21.3516	3.82e-06	9.71e-05
2:1:435225976	Hypo	2H	435225976	1	0.859456	3.99981	12.673	0.000370969	0.00525317	0.943334	4.07414	13.4063	0.000250787	0.00293807	0.938141	4.19338	10.8497	0.000988136	0.00683504
2:1:435298042	Hypo	2H	435298042	1	1.3813	5.10605	38.6796	4.99e-10	1.82e-07	1.28521	5.06512	35.6761	2.33e-09	2.5e-07	1.08787	5.04124	15.6652	7.56e-05	0.00098378
2:1:435348969	Hypo	2H	435348969	1	1.2403	3.38005	19.4912	1.01e-05	0.000366739	1.54256	3.56999	33.5886	6.81e-09	5.97e-07	1.89708	3.8419	34.5244	4.21e-09	4.87e-07
2:1:435432430	Hypo	2H	435432430	1	1.03178	3.19573	12.1609	0.000488023	0.00640535	1.68278	3.55792	35.2087	2.96e-09	3.07e-07	1.83415	3.71634	40.2766	2.2e-10	4.86e-08
2:1:435539173	Hypo	2H	435539173	1	1.23518	3.48079	18.9873	1.32e-05	0.00044625	1.86162	3.85234	53.8032	2.22e-13	1.51e-10	1.9187	3.96331	40.1561	2.34e-10	5.11e-08
2:1:435788051	Hypo	2H	435788051	1	0.826005	4.77709	23.2546	1.42e-06	8.11e-05	1.15043	4.99274	35.7647	2.23e-09	2.41e-07	1.12941	5.08256	26.5702	2.54e-07	1.18e-05
2:1:435791925	Hypo	2H	435791925	1	0.731483	4.06285	13.8299	0.000200131	0.00334524	0.986296	4.2251	24.3478	8.04e-07	3.05e-05	0.872789	4.29215	11.9761	0.000538866	0.00433455
2:1:435825107	Hypo	2H	435825107	1	1.40027	5.17731	24.8024	6.35e-07	4.42e-05	1.46262	5.22908	26.2644	2.98e-07	1.36e-05	1.37626	5.26595	21.0032	4.59e-06	0.000111895
2:1:435875821	Hypo	2H	435875821	1	1.39876	3.32227	31.1656	2.37e-08	3.46e-06	1.30727	3.30702	20.4538	6.11e-06	0.000157413	1.46217	3.49386	19.5563	9.77e-06	0.000201128
2:1:436007420	Hypo	2H	436007420	1	0.584386	5.12988	13.9207	0.000190687	0.00322984	0.74019	5.24008	19.6805	9.15e-06	0.000217359	0.746059	5.37635	18.1106	2.08e-05	0.000366052
2:1:436047945	Hypo	2H	436047945	1	0.685438	4.48984	13.5853	0.000227964	0.00367928	0.666016	4.50522	10.7289	0.00105476	0.0087219	0.93598	4.77275	18.3266	1.86e-05	0.00033402
2:1:436312995	Hypo	2H	436312995	1	1.2022	4.61453	41.2238	1.36e-10	7.03e-08	1.41679	4.76371	54.1045	1.9e-13	1.35e-10	1.16637	4.71481	23.3838	1.33e-06	4.33e-05
2:1:436395683	Hypo	2H	436395683	1	0.800048	3.74073	12.4156	0.000425767	0.00580012	1.22931	3.99841	30.9819	2.6e-08	1.85e-06	0.916645	3.95826	11.3625	0.000749401	0.00556339
2:1:436498455	Hypo	2H	436498455	1	1.43551	2.80976	16.3743	5.2e-05	0.00123049	1.6203	2.93178	20.5618	5.77e-06	0.000150837	2.19426	3.31244	29.184	6.58e-08	4.1e-06
2:1:436593351	Hyper	2H	436593351	1	-1.25278	2.91241	20.2737	6.71e-06	0.000269782	-1.0113	3.01976	11.7557	0.000606564	0.00572535	-1.42802	3.22093	15.374	8.82e-05	0.00110162
2:1:436797215	Hypo	2H	436797215	1	0.863906	4.94024	20.0196	7.67e-06	0.000298842	1.31244	5.2358	52.4082	4.51e-13	2.63e-10	1.3595	5.35102	45.4726	1.55e-11	6.19e-09
2:1:436843148	Hypo	2H	436843148	1	1.08455	3.79303	17.2584	3.26e-05	0.000876825	1.2871	3.93259	22.9808	1.64e-06	5.49e-05	1.43639	4.11473	20.9498	4.71e-06	0.000114184
2:1:436907851	Hypo	2H	436907851	1	0.953218	3.98425	17.9104	2.32e-05	0.000679876	1.18759	4.13685	26.4858	2.65e-07	1.25e-05	1.28251	4.2893	29.906	4.54e-08	3.07e-06
2:1:437051134	Hypo	2H	437051134	1	1.15014	3.87091	21.918	2.85e-06	0.000139417	1.3445	4.00928	24.7533	6.52e-07	2.59e-05	1.33673	4.10248	20.6018	5.65e-06	0.00013136
2:1:437210436	Hypo	2H	437210436	1	0.853343	5.00062	23.6361	1.16e-06	7.01e-05	1.04859	5.14125	30.1997	3.9e-08	2.57e-06	0.928767	5.18734	17.7506	2.52e-05	0.000423946
2:1:437492048	Hypo	2H	437492048	1	1.66573	4.21557	44.5264	2.51e-11	1.97e-08	1.87996	4.37345	59.4018	1.29e-14	1.79e-11	1.95223	4.47244	47.3944	5.8e-12	2.86e-09
2:1:437807291	Hypo	2H	437807291	1	1.05861	4.64509	32.3555	1.28e-08	2.16e-06	1.42666	4.89779	44.7803	2.2e-11	5.76e-09	1.43683	4.98225	39.1881	3.85e-10	7.54e-08
2:1:438034970	Hypo	2H	438034970	1	1.12083	3.12356	11.5106	0.000691988	0.00821387	1.69651	3.44167	38.4099	5.73e-10	7.98e-08	1.35552	3.37772	12.7695	0.000352315	0.00314566
2:1:438060814	Hypo	2H	438060814	1	0.993627	4.68616	25.1012	5.44e-07	3.92e-05	1.04735	4.73899	26.2205	3.05e-07	1.39e-05	1.14848	4.89824	23.7751	1.08e-06	3.7e-05
2:1:438426896	Hypo	2H	438426896	1	1.16532	5.47021	39.3377	3.56e-10	1.41e-07	1.22381	5.52811	43.8767	3.5e-11	8.34e-09	1.14144	5.57152	28.9858	7.29e-08	4.48e-06
2:1:438431984	Hypo	2H	438431984	1	1.32409	2.8284	17.037	3.67e-05	0.000954662	1.5885	2.9874	25.8663	3.66e-07	1.61e-05	1.517	3.07911	12.9602	0.000318175	0.00291763
2:1:438604928	Hypo	2H	438604928	1	1.22083	3.09416	13.9785	0.00018491	0.00316003	1.51623	3.2691	25.9159	3.57e-07	1.57e-05	1.96487	3.58509	27.7798	1.36e-07	7.3e-06
2:1:438650825	Hypo	2H	438650825	1	1.2534	2.76413	13.9819	0.000184581	0.00315668	1.28782	2.82319	13.3697	0.000255728	0.0029803	1.70518	3.09441	19.4234	1.05e-05	0.00021256
2:1:438666094	Hypo	2H	438666094	1	0.985827	2.72368	11.2593	0.000792259	0.00905527	1.21511	2.86958	14.9464	0.000110607	0.00154755	1.45907	3.0951	14.7418	0.000123283	0.00142387
2:1:438680975	Hypo	2H	438680975	1	1.11244	3.31465	15.499	8.26e-05	0.00175952	1.10637	3.34291	16.3729	5.2e-05	0.000852315	1.36283	3.57736	18.9573	1.34e-05	0.000258686
2:1:438708636	Hypo	2H	438708636	1	1.12742	3.87225	21.6792	3.22e-06	0.00015385	1.37001	4.04031	27.627	1.47e-07	7.66e-06	1.69008	4.30708	36.2785	1.71e-09	2.44e-07
2:1:438808955	Hypo	2H	438808955	1	0.986397	3.06208	12.3964	0.000430162	0.00584462	1.01389	3.10616	14.83	0.000117652	0.00162527	1.38917	3.41269	16.4579	4.97e-05	0.000715992
2:1:438864417	Hypo	2H	438864417	1	1.15763	4.76353	31.9272	1.6e-08	2.55e-06	0.920714	4.6423	16.7544	4.25e-05	0.000729804	1.05977	4.83331	18.8137	1.44e-05	0.000274818
2:1:439155654	Hypo	2H	439155654	1	0.668086	3.77989	11.8375	0.000580495	0.00726919	0.905823	3.92414	17.7657	2.5e-05	0.000479496	0.999045	4.093	18.9707	1.33e-05	0.00025708
2:1:439180521	Hypo	2H	439180521	1	0.679352	5.42335	19.1426	1.21e-05	0.000418651	0.832359	5.53222	25.0032	5.72e-07	2.32e-05	0.859875	5.6697	18.4609	1.73e-05	0.0003168
2:1:439403735	Hypo	2H	439403735	1	1.72514	2.77524	19.2011	1.18e-05	0.000409662	1.58321	2.75987	22.2571	2.38e-06	7.46e-05	2.23466	3.1281	25.9232	3.55e-07	1.55e-05
2:1:439547394	Hypo	2H	439547394	1	1.00606	3.91672	14.7868	0.000120372	0.00230157	1.40865	4.17774	25.757	3.87e-07	1.69e-05	1.4442	4.28475	19.2777	1.13e-05	0.000225657
2:1:439627197	Hypo	2H	439627197	1	1.7736	2.86761	24.9525	5.88e-07	4.16e-05	2.35032	3.19048	48.5676	3.19e-12	1.22e-09	2.32633	3.25424	37.9363	7.31e-10	1.22e-07
2:1:440785825	Hypo	2H	440785825	1	1.29113	3.14648	16.6264	4.55e-05	0.00111647	1.43778	3.25462	20.6346	5.56e-06	0.000146121	1.59453	3.43464	18.1967	1.99e-05	0.000353478
2:1:440834852	Hypo	2H	440834852	1	0.735851	5.9412	23.1367	1.51e-06	8.47e-05	0.79523	6.00164	25.3621	4.75e-07	2e-05	0.780551	6.11509	17.5721	2.77e-05	0.000456937
2:1:441926438	Hyper	2H	441926438	1	-1.02075	3.01115	17.2544	3.27e-05	0.000878125	-1.1232	3.05387	18.0889	2.11e-05	0.000418515	-1.28645	3.29471	16.1588	5.82e-05	0.000806892
2:1:442077118	Hyper	2H	442077118	1	-0.998542	4.98762	34.3048	4.71e-09	1e-06	-0.915537	5.02596	25.41	4.64e-07	1.96e-05	-1.42919	5.21724	43.5288	4.18e-11	1.33e-08
2:1:442889277	Hypo	2H	442889277	1	0.893554	3.57676	11.036	0.000893577	0.00984108	1.29218	3.8097	25.7383	3.91e-07	1.7e-05	1.46714	3.99971	29.2598	6.33e-08	3.99e-06
2:1:443070201	Hypo	2H	443070201	1	0.91606	3.7994	14.2348	0.000161357	0.00286485	1.12328	3.94283	19.3985	1.06e-05	0.000243983	1.00314	3.99959	12.0431	0.000519831	0.00421926
2:1:443823764	Hyper	2H	443823764	1	-1.63449	2.9661	22.7625	1.83e-06	9.89e-05	-1.33542	3.07381	16.4552	4.98e-05	0.000823276	-1.1434	3.37593	10.1965	0.00140709	0.00894104
2:1:443942209	Hypo	2H	443942209	1	1.05079	5.37581	31.2221	2.3e-08	3.39e-06	1.13093	5.44884	31.5049	1.99e-08	1.46e-06	1.25036	5.609	33.4228	7.42e-09	7.51e-07
2:1:444516438	Hypo	2H	444516438	1	0.981262	2.82745	11.6271	0.000649987	0.00787118	1.13222	2.93768	12.3667	0.000437067	0.00448081	1.46114	3.19764	14.7793	0.000120857	0.00140175
2:1:444727803	Hypo	2H	444727803	1	1.31991	2.68065	13.4501	0.00024499	0.00388715	1.68276	2.8766	19.3602	1.08e-05	0.000247612	2.07244	3.13771	29.4667	5.69e-08	3.67e-06
2:1:444832976	Hypo	2H	444832976	1	1.46	2.49528	18.4928	1.71e-05	0.000540479	1.38628	2.52699	15.3565	8.9e-05	0.00129906	1.56945	2.70337	12.8672	0.000334392	0.00302559
2:1:445117105	Hypo	2H	445117105	1	0.746254	3.70706	11.1008	0.000862901	0.00960003	0.818499	3.76269	12.3475	0.000441578	0.00451712	1.86249	4.4633	22.0462	2.66e-06	7.36e-05
2:1:446241643	Hypo	2H	446241643	1	1.54658	2.53435	16.0705	6.1e-05	0.00140072	1.90063	2.72466	31.4627	2.03e-08	1.49e-06	2.32854	2.99786	27.1605	1.87e-07	9.36e-06
2:1:446883124	Hyper	2H	446883124	1	-0.543894	7.394	28.375	9.99e-08	1.07e-05	-0.450031	7.4459	17.1993	3.37e-05	0.000607804	-0.49365	7.68038	10.024	0.00154512	0.00960124
2:1:447057994	Hypo	2H	447057994	1	1.28349	4.54896	58.723	1.82e-14	8.64e-11	1.1945	4.50815	45.0403	1.93e-11	5.08e-09	1.43551	4.74677	46.225	1.05e-11	4.64e-09
2:1:447348271	Hypo	2H	447348271	1	1.42421	2.97817	20.4937	5.98e-06	0.000248061	1.55203	3.06756	25.9727	3.46e-07	1.54e-05	1.3702	3.11517	17.0253	3.69e-05	0.000568752
2:1:447394485	Hypo	2H	447394485	1	1.59103	2.78336	32.2065	1.39e-08	2.28e-06	1.57082	2.83104	27.0694	1.96e-07	9.74e-06	1.43783	2.89911	15.5393	8.08e-05	0.00103116
2:1:447394546	Hypo	2H	447394546	1	1.40702	3.68983	26.5653	2.55e-07	2.19e-05	1.50246	3.77203	28.9453	7.45e-08	4.4e-06	1.90094	4.0748	36.4777	1.54e-09	2.24e-07
2:1:447642261	Hyper	2H	447642261	1	-1.02532	4.88599	27.0052	2.03e-07	1.85e-05	-1.1428	4.86957	32.5326	1.17e-08	9.32e-07	-1.50978	5.11465	32.4881	1.2e-08	1.1e-06
2:1:448119890	Hypo	2H	448119890	1	1.85279	2.73778	24.8169	6.3e-07	4.39e-05	1.30078	2.58514	11.8142	0.000587803	0.00558714	1.69528	2.83987	13.5292	0.000234874	0.00232132
2:1:448282759	Hypo	2H	448282759	1	1.56478	2.89239	20.5294	5.87e-06	0.000244811	1.3207	2.8484	20.3445	6.47e-06	0.000164618	1.85034	3.15481	20.6647	5.47e-06	0.000127992
2:1:448933540	Hypo	2H	448933540	1	0.959995	3.55217	15.5374	8.09e-05	0.00173463	1.29085	3.75634	22.5092	2.09e-06	6.7e-05	1.26336	3.85268	18.1009	2.09e-05	0.00036738
2:1:449064559	Hyper	2H	449064559	1	-0.654723	9.18989	35.6786	2.33e-09	5.85e-07	-0.638766	9.20229	28.8643	7.76e-08	4.55e-06	-0.779654	9.43751	19.622	9.44e-06	0.000195966
2:1:449201231	Hyper	2H	449201231	1	-1.31263	3.41618	25.0239	5.66e-07	4.05e-05	-1.08228	3.51301	16.9452	3.85e-05	0.000674196	-1.84547	3.67956	27.9417	1.25e-07	6.87e-06
2:1:449436690	Hypo	2H	449436690	1	0.763288	4.4887	13.785	0.000204965	0.00340311	0.839291	4.55575	14.3051	0.000155442	0.00202477	0.803652	4.66199	11.4701	0.000707236	0.00533593
2:1:449830895	Hypo	2H	449830895	1	1.45593	2.7671	16.6302	4.54e-05	0.00111533	1.26288	2.74338	13.5697	0.000229864	0.00274666	1.6415	3.00352	14.8366	0.000117237	0.00137055
2:1:450055278	Hypo	2H	450055278	1	1.05051	3.97232	19.8505	8.37e-06	0.000319975	1.06662	4.00381	19.4431	1.04e-05	0.000239687	1.40326	4.28374	25.1504	5.3e-07	2.11e-05
2:1:450770323	Hypo	2H	450770323	1	1.55981	3.19907	31.5565	1.94e-08	2.93e-06	1.80088	3.35334	35.7618	2.23e-09	2.41e-07	1.75086	3.41159	26.5117	2.62e-07	1.21e-05
2:1:452274253	Hypo	2H	452274253	1	0.898772	2.98206	11.4005	0.000734253	0.0085641	0.969925	3.05857	12.8963	0.000329238	0.00362	1.92167	3.64393	20.8438	4.98e-06	0.000119189
2:1:452703262	Hyper	2H	452703262	1	-0.670927	4.11395	13.106	0.000294344	0.00443277	-0.797186	4.10075	15.9265	6.58e-05	0.00102334	-1.18045	4.30125	23.0136	1.61e-06	5.03e-05
2:1:453069088	Hyper	2H	453069088	1	-1.05416	5.25931	32.4351	1.23e-08	2.11e-06	-1.26686	5.22445	40.557	1.91e-10	3.18e-08	-1.26082	5.53637	30.2799	3.74e-08	2.65e-06
2:1:453497283	Hyper	2H	453497283	1	-1.35166	3.28235	29.3157	6.15e-08	7.38e-06	-1.03822	3.40595	19.8728	8.28e-06	0.000201057	-1.60095	3.5955	27.5476	1.53e-07	8e-06
2:1:453652064	Hypo	2H	453652064	1	0.86961	5.63686	28.4816	9.46e-08	1.03e-05	0.914301	5.68397	32.5524	1.16e-08	9.24e-07	0.726293	5.7047	14.1724	0.000166802	0.00178568
2:1:453889835	Hypo	2H	453889835	1	1.01644	3.54147	22.285	2.35e-06	0.000120414	1.02654	3.57219	17.0237	3.69e-05	0.000653226	1.01402	3.69443	14.0478	0.000178218	0.00188156
2:1:453910125	Hypo	2H	453910125	1	1.0805	4.22335	22.3891	2.23e-06	0.00011525	1.12153	4.277	17.298	3.2e-05	0.000582718	1.16104	4.39425	19.5107	1e-05	0.000205176
2:1:454372293	Hypo	2H	454372293	1	2.00121	2.62233	21.3689	3.79e-06	0.000173901	2.30044	2.80348	35.5012	2.55e-09	2.69e-07	2.30135	2.912	23.4527	1.28e-06	4.22e-05
2:1:454477939	Hypo	2H	454477939	1	1.18153	3.0054	11.3498	0.000754572	0.00873605	1.07123	2.99918	10.5612	0.00115486	0.00932705	1.38011	3.25637	13.1623	0.000285633	0.00268891
2:1:455770492	Hypo	2H	455770492	1	1.51911	2.78821	21.2469	4.04e-06	0.000182868	1.58086	2.85648	24.6508	6.87e-07	2.71e-05	1.32667	2.89089	10.2713	0.00135113	0.00867482
2:1:456093888	Hyper	2H	456093888	1	-0.963317	3.25476	14.6602	0.000128735	0.00242318	-1.22395	3.25978	23.2377	1.43e-06	4.92e-05	-1.1035	3.55444	12.9634	0.000317639	0.00291326
2:1:456365653	Hypo	2H	456365653	1	1.05237	2.9968	12.1368	0.000494361	0.0064653	1.59716	3.28876	29.9272	4.49e-08	2.9e-06	1.57891	3.39416	21.4086	3.71e-06	9.49e-05
2:1:456692132	Hyper	2H	456692132	1	-0.721628	5.60622	29.5299	5.51e-08	6.82e-06	-0.739569	5.61787	28.1356	1.13e-07	6.19e-06	-0.973119	5.82985	30.9602	2.63e-08	2.04e-06
2:1:457086949	Hypo	2H	457086949	1	0.982204	3.12599	11.4694	0.000707513	0.00834211	1.39337	3.35691	21.6046	3.35e-06	9.81e-05	1.45899	3.50827	16.4636	4.96e-05	0.000714351
2:1:457282215	Hypo	2H	457282215	1	1.1698	3.62421	19.3892	1.07e-05	0.000381292	1.29144	3.72265	32.6679	1.09e-08	8.81e-07	1.88954	4.12746	47.2854	6.14e-12	2.97e-09
2:1:457459362	Hyper	2H	457459362	1	-1.23025	3.84598	32.5452	1.16e-08	2.02e-06	-0.999117	3.94891	20.5731	5.74e-06	0.000150052	-1.54778	4.13695	32.7614	1.04e-08	9.78e-07
2:1:457677885	Hypo	2H	457677885	1	2.40715	2.52192	25.7861	3.81e-07	3.01e-05	2.52128	2.64023	37.7056	8.23e-10	1.06e-07	3.08502	2.95754	38.4231	5.7e-10	1.01e-07
2:1:457734622	Hyper	2H	457734622	1	-0.586374	4.34361	11.3162	0.00076835	0.00885596	-0.666667	4.34745	11.8246	0.000584519	0.00556273	-0.819628	4.57234	13.1046	0.000294574	0.00275313
2:1:457990496	Hypo	2H	457990496	1	0.757514	6.76784	20.8738	4.91e-06	0.00021285	0.781618	6.80642	18.3607	1.83e-05	0.000373993	0.660105	6.86532	10.6961	0.0010736	0.0072693
2:1:458045734	Hyper	2H	458045734	1	-0.924955	3.51248	14.6293	0.000130864	0.00245542	-1.17883	3.50423	20.6784	5.43e-06	0.000143727	-0.85403	3.84286	10.1708	0.00142686	0.00903817
2:1:458196413	Hypo	2H	458196413	1	0.833911	5.50357	20.0724	7.46e-06	0.000292903	0.756151	5.48012	15.2228	9.55e-05	0.00137679	0.741748	5.60107	11.0976	0.000864394	0.00617971
2:1:458347892	Hyper	2H	458347892	1	-0.659762	4.9074	12.2999	0.000452992	0.00607064	-0.923588	4.83736	22.0699	2.63e-06	8.05e-05	-1.22474	5.06948	24.3464	8.05e-07	2.93e-05
2:1:458385112	Hypo	2H	458385112	1	1.19044	3.45191	19.3124	1.11e-05	0.000392342	1.62697	3.71441	37.72	8.17e-10	1.05e-07	1.11674	3.56795	13.9409	0.000188645	0.0019662
2:1:459060753	Hypo	2H	459060753	1	1.53217	2.36699	15.3453	8.95e-05	0.00186875	1.88027	2.5414	20.8992	4.84e-06	0.000131161	2.26314	2.78354	22.825	1.77e-06	5.43e-05
2:1:459515580	Hyper	2H	459515580	1	-1.44387	2.45723	15.3102	9.12e-05	0.00189388	-1.38187	2.56128	12.7065	0.000364394	0.00391071	-2.40505	2.74522	21.6749	3.23e-06	8.55e-05
2:1:460399555	Hypo	2H	460399555	1	1.27408	3.11444	19.838	8.43e-06	0.000321245	1.50773	3.2589	30.8855	2.74e-08	1.93e-06	1.72851	3.46239	21.2149	4.11e-06	0.000102548
2:1:460628960	Hyper	2H	460628960	1	-0.890893	3.29821	14.4374	0.000144894	0.00264506	-1.35693	3.26204	23.9171	1.01e-06	3.67e-05	-1.38419	3.53991	18.7045	1.53e-05	0.000287137
2:1:460662004	Hypo	2H	460662004	1	1.27237	3.7188	25.9733	3.46e-07	2.8e-05	1.40983	3.82145	33.9437	5.67e-09	5.14e-07	1.56547	3.99704	27.7296	1.4e-07	7.45e-06
2:1:460829322	Hypo	2H	460829322	1	1.1824	2.97473	11.9191	0.000555623	0.00704217	1.38739	3.12687	24.1825	8.76e-07	3.28e-05	1.43653	3.23839	13.3651	0.000256356	0.00247345
2:1:461175700	Hyper	2H	461175700	1	-1.53093	2.47986	11.9588	0.00054391	0.00692913	-1.50771	2.56636	12.1155	0.000500056	0.00495119	-1.61243	2.81872	10.3599	0.00128779	0.00835894
2:1:461253683	Hypo	2H	461253683	1	1.92758	2.56709	24.5703	7.16e-07	4.83e-05	1.90822	2.60977	25.1558	5.29e-07	2.18e-05	1.99444	2.76641	17.8605	2.38e-05	0.000405683
2:1:461449403	Hypo	2H	461449403	1	0.766247	4.25542	11.245	0.000798397	0.00910426	0.941445	4.37068	19.0904	1.25e-05	0.000276669	1.13005	4.5936	20.709	5.35e-06	0.000125721
2:1:461566631	Hyper	2H	461566631	1	-1.05655	2.71914	11.8078	0.000589828	0.00734742	-1.39503	2.7456	17.7018	2.58e-05	0.000492885	-1.38255	3.00569	12.8384	0.000339575	0.00305837
2:1:461634208	Hypo	2H	461634208	1	1.00072	3.2243	17.1362	3.48e-05	0.000919961	1.06015	3.28775	15.0214	0.000106296	0.00149882	0.991328	3.38747	10.8954	0.000964032	0.0067096
2:1:461634248	Hypo	2H	461634248	1	1.05963	3.01887	13.264	0.000270545	0.00417446	1.6675	3.34161	33.8434	5.97e-09	5.34e-07	1.445	3.33636	23.3536	1.35e-06	4.38e-05
2:1:461646369	Hyper	2H	461646369	1	-0.626556	6.05732	17.7925	2.46e-05	0.000713602	-0.822383	5.98903	28.0303	1.19e-07	6.46e-06	-1.04123	6.23049	23.4138	1.31e-06	4.28e-05
2:1:462528515	Hyper	2H	462528515	1	-1.26046	3.07562	16.5689	4.69e-05	0.00114155	-1.16449	3.14847	12.9473	0.000320387	0.00354575	-1.38883	3.39948	12.0451	0.000519297	0.004217
2:1:462712255	Hypo	2H	462712255	1	1.04554	4.08171	19.0001	1.31e-05	0.000443772	1.1542	4.16312	25.3543	4.77e-07	2.01e-05	0.944902	4.1743	13.5826	0.000228292	0.00227426
2:1:462923276	Hypo	2H	462923276	1	0.965662	4.72587	24.0649	9.31e-07	5.93e-05	0.936009	4.72786	17.512	2.86e-05	0.00053388	1.12042	4.93812	21.0439	4.49e-06	0.000110087
2:1:463754366	Hyper	2H	463754366	1	-0.999705	4.67197	26.6998	2.38e-07	2.09e-05	-1.03457	4.70534	22.6511	1.94e-06	6.32e-05	-1.68286	4.86885	39.4451	3.37e-10	6.76e-08
2:1:464007958	Hyper	2H	464007958	1	-0.709814	4.34898	11.679	0.000632108	0.00772221	-0.773132	4.37097	15.6694	7.54e-05	0.00113685	-0.945541	4.59024	15.6994	7.42e-05	0.000970485
2:1:464111258	Hypo	2H	464111258	1	1.1176	5.23089	34.9425	3.4e-09	7.91e-07	1.16948	5.28504	34.8377	3.58e-09	3.59e-07	0.898894	5.23805	14.5297	0.000137964	0.00154937
2:1:464145199	Hypo	2H	464145199	1	1.45863	2.37833	11.1825	0.000825727	0.00931088	1.67536	2.49071	19.643	9.33e-06	0.000220725	2.39325	2.90509	22.2452	2.4e-06	6.8e-05
2:1:464313188	Hyper	2H	464313188	1	-1.08416	4.97221	38.5339	5.38e-10	1.91e-07	-0.868185	5.0652	25.487	4.45e-07	1.9e-05	-1.13754	5.28634	27.8889	1.28e-07	7e-06
2:1:464687076	Hyper	2H	464687076	1	-0.496697	6.07589	12.1875	0.000481114	0.00634427	-0.564468	6.05497	11.0093	0.000906567	0.00777333	-1.05901	6.18811	33.6079	6.74e-09	7.02e-07
2:1:464744295	Hyper	2H	464744295	1	-0.482467	5.99869	12.2544	0.000464155	0.00617817	-0.676362	5.93804	22.2697	2.37e-06	7.42e-05	-0.828112	6.16681	21.4848	3.57e-06	9.22e-05
2:1:465051570	Hypo	2H	465051570	1	0.784714	3.36527	11.3319	0.000761852	0.00880408	0.94704	3.4803	14.1101	0.000172419	0.00219877	0.978187	3.63211	12.2125	0.000474714	0.00393458
2:1:465212468	Hyper	2H	465212468	1	-1.11552	8.37392	57.1986	3.94e-14	1.68e-10	-1.02308	8.40597	38.3238	5.99e-10	8.28e-08	-1.61993	8.59085	57.5982	3.22e-14	5.38e-11
2:1:465308867	Hyper	2H	465308867	1	-0.722523	6.09787	21.8254	2.99e-06	0.000144767	-0.684431	6.11565	13.4861	0.000240331	0.00284247	-1.06771	6.30235	25.7383	3.91e-07	1.67e-05
2:1:465319197	Hypo	2H	465319197	1	0.886354	3.26918	11.4544	0.000713262	0.00839245	1.14381	3.42609	18.145	2.05e-05	0.000408992	1.20266	3.58015	13.6219	0.000223565	0.00223818
2:1:465386635	Hypo	2H	465386635	1	1.24566	2.98836	15.5692	7.95e-05	0.00171156	1.50973	3.14703	25.4098	4.64e-07	1.96e-05	1.65953	3.32349	21.976	2.76e-06	7.56e-05
2:1:465502957	Hyper	2H	465502957	1	-0.730581	3.79668	12.0465	0.000518893	0.00669495	-0.900435	3.78453	15.6987	7.43e-05	0.00112311	-1.21515	3.99979	18.4644	1.73e-05	0.000316377
2:1:465552294	Hyper	2H	465552294	1	-1.38222	2.45023	14.1411	0.0001696	0.00297088	-1.57732	2.5131	15.7749	7.13e-05	0.00108997	-1.52963	2.76652	11.325	0.000764715	0.00564524
2:1:466337664	Hyper	2H	466337664	1	-0.564486	5.01185	11.4319	0.000721958	0.00846798	-0.711833	4.98414	15.7649	7.17e-05	0.00109431	-1.02617	5.1766	21.4617	3.61e-06	9.3e-05
2:1:466402490	Hyper	2H	466402490	1	-0.821205	6.28943	25.1138	5.4e-07	3.91e-05	-0.696934	6.3414	13.6729	0.00021757	0.00263252	-1.12924	6.51247	27.4063	1.65e-07	8.45e-06
2:1:466545992	Hypo	2H	466545992	1	0.829321	3.61557	12.3727	0.000435655	0.00589838	1.29616	3.88516	33.2238	8.21e-09	6.96e-07	1.10872	3.90104	18.7712	1.47e-05	0.000279121
2:1:466628867	Hypo	2H	466628867	1	0.750495	6.43871	16.38	5.18e-05	0.00122729	0.917599	6.57037	23.4943	1.25e-06	4.4e-05	1.58554	7.08356	39.0806	4.07e-10	7.84e-08
2:1:466773579	Hyper	2H	466773579	1	-0.736914	8.50053	26.3752	2.81e-07	2.37e-05	-0.822315	8.48547	25.0922	5.47e-07	2.24e-05	-1.69471	8.5651	71.5977	2.64e-17	2.49e-13
2:1:466849370	Hyper	2H	466849370	1	-0.709359	6.64753	20.453	6.11e-06	0.000250818	-0.669539	6.65938	14.4404	0.000144667	0.00191356	-1.06595	6.84454	24.4252	7.73e-07	2.83e-05
2:1:466890209	Hypo	2H	466890209	1	1.45289	3.23557	25.5804	4.24e-07	3.27e-05	1.4902	3.28448	22.2854	2.35e-06	7.37e-05	1.86589	3.56039	36.1942	1.79e-09	2.51e-07
2:1:466938998	Hyper	2H	466938998	1	-0.572907	5.57364	19.1301	1.22e-05	0.000420658	-0.613437	5.57601	18.14	2.05e-05	0.000409792	-0.880301	5.76237	25.3004	4.91e-07	1.99e-05
2:1:467052163	Hyper	2H	467052163	1	-0.834692	4.99754	14.5949	0.000133273	0.00248518	-0.769969	5.04116	11.0895	0.0008682	0.00752008	-1.31005	5.19835	21.0011	4.59e-06	0.000111895
2:1:467096956	Hyper	2H	467096956	1	-1.06317	8.72189	55.2792	1.05e-13	3.11e-10	-1.03277	8.73135	45.8494	1.28e-11	3.65e-09	-1.49725	8.94541	54.1218	1.88e-13	1.9e-10
2:1:467117937	Hyper	2H	467117937	1	-1.10853	4.81075	29.21	6.49e-08	7.7e-06	-1.19379	4.80501	23.8474	1.04e-06	3.78e-05	-1.26198	5.11065	21.6467	3.28e-06	8.64e-05
2:1:467133484	Hypo	2H	467133484	1	0.912342	5.06089	18.9108	1.37e-05	0.000460295	1.10066	5.19417	28.3524	1.01e-07	5.66e-06	1.29972	5.42894	20.8504	4.97e-06	0.000118892
2:1:467135271	Hyper	2H	467135271	1	-1.39675	7.21294	34.79	3.67e-09	8.41e-07	-0.984557	7.32494	19.1902	1.18e-05	0.000265657	-1.40864	7.56669	26.6416	2.45e-07	1.15e-05
2:1:467312492	Hypo	2H	467312492	1	1.19581	3.25318	16.3926	5.15e-05	0.00122231	1.64488	3.5156	36.2638	1.72e-09	1.96e-07	1.55088	3.55903	19.0896	1.25e-05	0.000244668
2:1:468378313	Hypo	2H	468378313	1	1.09207	5.30904	34.0807	5.29e-09	1.09e-06	1.1723	5.37703	34.2096	4.95e-09	4.59e-07	0.860907	5.30658	13.5265	0.000235222	0.00232381
2:1:468477039	Hypo	2H	468477039	1	1.1651	3.19421	14.0446	0.000178526	0.00307967	1.45773	3.3615	26.2418	3.01e-07	1.38e-05	1.85939	3.664	34.4345	4.41e-09	5.04e-07
2:1:468502034	Hyper	2H	468502034	1	-0.949655	3.54018	16.7733	4.21e-05	0.00105937	-1.36618	3.4926	28.1198	1.14e-07	6.23e-06	-1.10948	3.82628	15.6636	7.57e-05	0.000984112
2:1:468595402	Hypo	2H	468595402	1	1.20704	2.64385	12.6567	0.000374225	0.00528733	1.4239	2.79397	12.3084	0.000450915	0.00458529	1.81577	3.07767	16.5761	4.67e-05	0.000681963
2:1:468596260	Hypo	2H	468596260	1	1.54035	2.54043	16.7784	4.2e-05	0.00105742	1.8721	2.71681	25.2219	5.11e-07	2.13e-05	2.07551	2.91243	21.7366	3.13e-06	8.35e-05
2:1:468653259	Hyper	2H	468653259	1	-1.2284	2.47659	13.8649	0.000196429	0.00329866	-1.38863	2.53154	15.11	0.000101423	0.00144382	-1.9607	2.74713	17.8387	2.4e-05	0.00040936
2:1:468763392	Hypo	2H	468763392	1	1.05668	4.19842	20.8561	4.95e-06	0.000214598	1.41305	4.4396	33.6831	6.49e-09	5.73e-07	1.42826	4.53157	26.8149	2.24e-07	1.07e-05
2:1:468873073	Hypo	2H	468873073	1	1.52192	2.89206	13.2156	0.000277626	0.0042498	1.62064	2.98708	16.7394	4.29e-05	0.000734477	2.33189	3.42254	22.1362	2.54e-06	7.12e-05
2:1:469172027	Hypo	2H	469172027	1	1.47254	2.52074	15.3813	8.79e-05	0.0018429	1.44558	2.58301	11.6898	0.000628439	0.0058861	1.71612	2.7977	16.2195	5.64e-05	0.000786945
2:1:469183799	Hypo	2H	469183799	1	1.16922	3.7839	25.9545	3.5e-07	2.82e-05	1.37638	3.92434	35.3166	2.8e-09	2.92e-07	1.27608	3.97172	18.2736	1.91e-05	0.000341432
2:1:469195352	Hypo	2H	469195352	1	1.42563	2.65704	18.6335	1.58e-05	0.000509765	1.43187	2.72217	15.7073	7.39e-05	0.00111979	1.74898	2.97754	17.5137	2.85e-05	0.000468279
2:1:469522711	Hypo	2H	469522711	1	1.42334	2.84447	19.2522	1.15e-05	0.000402272	1.21903	2.81311	12.3644	0.00043759	0.0044838	1.41895	3.01633	10.8878	0.000968014	0.00672933
2:1:469740682	Hypo	2H	469740682	1	1.63862	3.34965	32.2578	1.35e-08	2.24e-06	1.66654	3.39354	31.8236	1.69e-08	1.27e-06	1.62759	3.46525	23.6893	1.13e-06	3.83e-05
2:1:469796060	Hypo	2H	469796060	1	1.11645	2.74193	14.9832	0.000108472	0.00213578	1.10587	2.79025	11.6849	0.00063009	0.00589779	1.37038	3.01771	14.0887	0.000174387	0.00185013
2:1:470489064	Hypo	2H	470489064	1	1.22374	3.45166	19.7138	9e-06	0.000336891	1.53476	3.64281	31.8135	1.7e-08	1.28e-06	1.94535	3.94318	37.9286	7.34e-10	1.22e-07
2:1:470522256	Hypo	2H	470522256	1	1.2828	3.94575	27.7023	1.41e-07	1.4e-05	1.6508	4.18507	43.1355	5.11e-11	1.14e-08	1.72196	4.28752	33.9694	5.6e-09	6.03e-07
2:1:470837502	Hypo	2H	470837502	1	1.24998	2.67834	15.2753	9.29e-05	0.00191812	1.3052	2.75211	14.1569	0.000168182	0.00215793	1.79831	3.05076	22.6791	1.91e-06	5.75e-05
2:1:471331895	Hypo	2H	471331895	1	1.14934	2.87868	12.9441	0.000320933	0.00472268	1.80267	3.2013	42.3698	7.55e-11	1.54e-08	1.61696	3.24638	18.6172	1.6e-05	0.000297181
2:1:471396698	Hypo	2H	471396698	1	1.00032	4.56964	29.1854	6.58e-08	7.76e-06	1.14635	4.67623	30.4819	3.37e-08	2.28e-06	1.13847	4.77303	26.7253	2.35e-07	1.11e-05
2:1:472263155	Hypo	2H	472263155	1	1.20347	3.44422	20.0031	7.73e-06	0.000300931	1.847	3.82946	49.1243	2.4e-12	9.66e-10	1.90501	3.93015	40.9369	1.57e-10	3.73e-08
2:1:472390691	Hypo	2H	472390691	1	0.903569	3.30469	12.1341	0.000495095	0.00647277	1.39603	3.58006	30.8663	2.76e-08	1.94e-06	0.970375	3.50661	11.501	0.000695581	0.00527046
2:1:472458275	Hypo	2H	472458275	1	1.14695	3.27032	15.5463	8.05e-05	0.00172839	1.09537	3.28955	12.1913	0.000480138	0.00480538	1.23631	3.4728	12.702	0.000365268	0.00323353
2:1:472627311	Hypo	2H	472627311	1	0.775493	4.12918	13.0096	0.000309896	0.00460294	0.737432	4.1386	10.4185	0.00124758	0.00990044	1.24764	4.51905	27.977	1.23e-07	6.79e-06
2:1:474132927	Hypo	2H	474132927	1	1.35549	3.27551	28.1819	1.1e-07	1.16e-05	1.40599	3.33455	30.1577	3.98e-08	2.61e-06	0.999909	3.28561	10.6483	0.00110174	0.0074141
2:1:474213438	Hypo	2H	474213438	1	0.794671	3.63627	12.8533	0.000336892	0.00489223	0.841311	3.68688	14.8339	0.000117403	0.00162318	0.854114	3.83679	10.1555	0.00143869	0.00909617
2:1:474482858	Hypo	2H	474482858	1	0.8084	3.67079	11.794	0.00059421	0.00738733	1.14685	3.87279	20.4182	6.22e-06	0.000159621	0.942375	3.89483	11.4414	0.000718248	0.00540034
2:1:475164072	Hyper	2H	475164072	1	-0.390553	6.50855	11.1063	0.000860333	0.00958041	-0.495287	6.48137	11.785	0.000597109	0.00565473	-0.797288	6.64142	24.0615	9.33e-07	3.29e-05
2:1:475194880	Hypo	2H	475194880	1	0.729103	6.3745	17.6858	2.61e-05	0.000743252	0.81228	6.44788	19.1202	1.23e-05	0.000273391	0.750033	6.53824	12.4854	0.000410155	0.00352837
2:1:475288276	Hypo	2H	475288276	1	1.00333	4.10276	18.7157	1.52e-05	0.000494132	1.25467	4.27002	30.7146	2.99e-08	2.07e-06	0.984578	4.23684	11.1528	0.000839054	0.00604616
2:1:475334999	Hypo	2H	475334999	1	0.895018	3.81148	12.8593	0.0003358	0.00488112	1.26413	4.0294	29.9343	4.47e-08	2.89e-06	1.58459	4.3169	34.3313	4.65e-09	5.27e-07
2:1:475337322	Hypo	2H	475337322	1	0.951303	4.40207	20.2471	6.81e-06	0.000272918	1.08052	4.49694	27.1992	1.84e-07	9.21e-06	1.305	4.7221	30.2536	3.79e-08	2.67e-06
2:1:475412764	Hypo	2H	475412764	1	1.33491	4.7873	36.9733	1.2e-09	3.55e-07	1.44272	4.87482	42.4165	7.38e-11	1.52e-08	1.29827	4.87131	25.933	3.53e-07	1.54e-05
2:1:476059408	Hypo	2H	476059408	1	1.11898	3.45992	20.3185	6.56e-06	0.000264802	1.67611	3.78967	47.693	4.98e-12	1.73e-09	1.42019	3.75324	18.037	2.17e-05	0.000377109
2:1:476173478	Hypo	2H	476173478	1	1.52604	4.38246	49.7887	1.71e-12	2.58e-09	1.71155	4.51368	66.049	4.4e-16	1.28e-12	1.93543	4.73096	62.7848	2.31e-15	7.34e-12
2:1:476328700	Hypo	2H	476328700	1	0.752453	4.37859	16.4123	5.1e-05	0.00121432	0.811347	4.43017	19.8711	8.28e-06	0.000201198	0.759042	4.5391	11.6066	0.000657181	0.00504927
2:1:476341849	Hypo	2H	476341849	1	1.46747	3.46138	32.4806	1.2e-08	2.07e-06	1.6921	3.62095	32.3598	1.28e-08	1.01e-06	1.5301	3.62749	21.5109	3.52e-06	9.13e-05
2:1:476434461	Hypo	2H	476434461	1	0.964318	2.93981	12.7041	0.000364851	0.00518875	1.13397	3.05273	14.9857	0.000108331	0.00152174	1.27324	3.23827	15.4662	8.4e-05	0.00106155
2:1:476917325	Hyper	2H	476917325	1	-0.920219	3.95687	16.6775	4.43e-05	0.00109711	-0.893123	3.99573	12.6626	0.000373036	0.0039822	-1.94334	4.10868	37.2567	1.04e-09	1.61e-07
2:1:477121885	Hypo	2H	477121885	1	0.980835	3.16464	14.6418	0.000129996	0.00244206	1.17743	3.29741	18.9266	1.36e-05	0.000295683	1.45066	3.53826	21.3056	3.92e-06	9.9e-05
2:1:477255625	Hypo	2H	477255625	1	0.82613	4.84462	27.7058	1.41e-07	1.4e-05	0.729587	4.80018	16.8779	3.99e-05	0.000693589	0.676278	4.91004	10.7942	0.00101818	0.00698173
2:1:477560813	Hypo	2H	477560813	1	1.33199	3.9252	34.3987	4.49e-09	9.69e-07	1.27144	3.91217	26.0134	3.39e-07	1.52e-05	1.78952	4.2833	43.7283	3.77e-11	1.23e-08
2:1:478115881	Hypo	2H	478115881	1	0.848024	4.11658	16.8291	4.09e-05	0.00103506	0.831922	4.13289	12.6808	0.00036943	0.00395275	1.0828	4.38255	15.6191	7.75e-05	0.00100095
2:1:478121198	Hypo	2H	478121198	1	1.11559	2.78191	12.043	0.000519866	0.00670097	1.4026	2.94665	19.009	1.3e-05	0.000285913	1.40753	3.06683	16.3354	5.31e-05	0.000750875
2:1:478181139	Hypo	2H	478181139	1	1.28774	3.32266	22.89	1.72e-06	9.4e-05	1.68548	3.54431	53.7053	2.33e-13	1.56e-10	1.50138	3.56957	24.1645	8.84e-07	3.16e-05
2:1:478911880	Hypo	2H	478911880	1	0.746531	5.59023	18.6699	1.55e-05	0.000502827	0.843562	5.66595	21.3416	3.84e-06	0.000109254	1.80664	6.39132	29.3734	5.97e-08	3.81e-06
2:1:478947681	Hyper	2H	478947681	1	-0.743331	4.93623	18.8002	1.45e-05	0.000478499	-0.676196	4.98211	16.0005	6.33e-05	0.000992199	-1.0925	5.15097	24.6011	7.05e-07	2.64e-05
2:1:479006438	Hyper	2H	479006438	1	-1.06138	3.53127	24.0251	9.51e-07	6.01e-05	-0.901093	3.6224	16.676	4.43e-05	0.000752074	-1.41992	3.80035	25.8537	3.68e-07	1.59e-05
2:1:479028628	Hyper	2H	479028628	1	-1.28422	2.80253	15.6604	7.58e-05	0.00165415	-1.11753	2.90133	11.3453	0.000756398	0.00676518	-1.53243	3.12085	14.4285	0.000145582	0.00161236
2:1:479207721	Hyper	2H	479207721	1	-1.02137	5.4726	43.6119	4e-11	2.8e-08	-0.994234	5.50134	28.4184	9.77e-08	5.51e-06	-1.23714	5.73814	36.9176	1.23e-09	1.85e-07
2:1:479219347	Hyper	2H	479219347	1	-0.854704	3.97112	13.8001	0.000203328	0.00338601	-0.767864	4.02164	10.8722	0.000976173	0.00821951	-1.10131	4.23024	15.2741	9.3e-05	0.00114719
2:1:479654971	Hyper	2H	479654971	1	-0.834901	3.54219	15.3213	9.07e-05	0.00188499	-0.803698	3.58278	12.648	0.000375968	0.00400179	-1.00378	3.81941	13.0299	0.000306561	0.00284095
2:1:479682790	Hypo	2H	479682790	1	0.628739	4.72276	11.913	0.000557421	0.00705683	0.872192	4.88221	20.0974	7.36e-06	0.000183128	0.842077	4.98771	13.3726	0.000255322	0.00246726
2:1:479843088	Hypo	2H	479843088	1	1.39239	2.75679	23.0968	1.54e-06	8.61e-05	1.25681	2.75936	13.0759	0.000299117	0.00336106	1.56339	2.99446	20.2287	6.87e-06	0.000152533
2:1:480188466	Hypo	2H	480188466	1	1.38701	4.27441	40.2588	2.22e-10	1e-07	1.5487	4.39872	39.8013	2.81e-10	4.39e-08	1.76296	4.59757	45.2923	1.7e-11	6.58e-09
2:1:480249253	Hypo	2H	480249253	1	1.15736	4.15193	28.6955	8.47e-08	9.52e-06	1.46966	4.3684	40.7151	1.76e-10	2.99e-08	1.58049	4.51671	29.8084	4.77e-08	3.2e-06
2:1:480484805	Hypo	2H	480484805	1	1.22259	3.82868	22.0913	2.6e-06	0.000130339	1.67917	4.11822	47.494	5.52e-12	1.85e-09	1.57926	4.14381	27.9254	1.26e-07	6.9e-06
2:1:480526046	Hypo	2H	480526046	1	0.66339	5.01385	17.5881	2.74e-05	0.000772623	0.790353	5.10382	20.7001	5.37e-06	0.000142432	0.986581	5.33038	24.5536	7.23e-07	2.69e-05
2:1:481728131	Hypo	2H	481728131	1	1.34772	2.88723	14.7671	0.000121641	0.00231885	1.54469	3.00276	28.6097	8.85e-08	5.08e-06	1.56665	3.13247	16.6736	4.44e-05	0.000657603
2:1:482674783	Hypo	2H	482674783	1	0.969307	3.55945	12.3946	0.000430582	0.00584855	1.13745	3.67537	18.8215	1.44e-05	0.00030868	1.12901	3.78799	15.9029	6.67e-05	0.00089545
2:1:482825007	Hypo	2H	482825007	1	1.78255	2.44737	18.3589	1.83e-05	0.000571601	1.85425	2.53075	22.9975	1.62e-06	5.45e-05	2.34277	2.81481	24.2608	8.41e-07	3.04e-05
2:1:483015588	Hypo	2H	483015588	1	1.39784	2.68644	21.3401	3.85e-06	0.000175903	1.82505	2.90279	32.7989	1.02e-08	8.33e-07	1.60191	2.92932	18.2757	1.91e-05	0.000341125
2:1:483516019	Hypo	2H	483516019	1	0.883164	5.09977	30.6206	3.14e-08	4.3e-06	1.09279	5.25021	37.8038	7.82e-10	1.02e-07	1.15304	5.39051	30.3257	3.65e-08	2.6e-06
2:1:483795280	Hypo	2H	483795280	1	0.886096	3.76183	18.2596	1.93e-05	0.000594552	1.05175	3.87882	18.7802	1.47e-05	0.000313836	0.943146	3.94891	12.9962	0.000312124	0.00287684
2:1:484544919	Hyper	2H	484544919	1	-0.917337	5.35105	31.6247	1.87e-08	2.86e-06	-0.837321	5.39993	22.6959	1.9e-06	6.2e-05	-1.13749	5.60435	28.589	8.95e-08	5.28e-06
2:1:484823717	Hypo	2H	484823717	1	1.29007	2.94451	16.0596	6.14e-05	0.00140566	1.55936	3.10773	24.5779	7.14e-07	2.78e-05	1.6664	3.25547	22.1781	2.48e-06	6.99e-05
2:1:484888157	Hypo	2H	484888157	1	1.42074	2.74186	14.9021	0.00011324	0.00220153	1.30545	2.74444	13.1255	0.000291296	0.00329334	1.66152	3.00425	15.4335	8.55e-05	0.00107537
2:1:485187635	Hypo	2H	485187635	1	1.14799	2.98408	13.0011	0.000311307	0.0046187	1.64973	3.25808	25.0152	5.69e-07	2.31e-05	1.36297	3.23645	12.9302	0.000323331	0.00295292
2:1:485240345	Hypo	2H	485240345	1	1.12796	2.96426	12.8642	0.000334926	0.00487565	1.49005	3.16857	21.616	3.33e-06	9.76e-05	1.61985	3.33188	21.5035	3.53e-06	9.16e-05
2:1:485878519	Hypo	2H	485878519	1	1.60982	3.85237	39.3267	3.59e-10	1.42e-07	1.87986	4.04531	53.763	2.26e-13	1.53e-10	1.92296	4.12685	40.3874	2.08e-10	4.66e-08
2:1:485992772	Hypo	2H	485992772	1	1.45422	4.31005	42.3445	7.65e-11	4.42e-08	1.54155	4.38691	41.3598	1.27e-10	2.3e-08	1.54044	4.47366	26.7548	2.31e-07	1.1e-05
2:1:486595621	Hyper	2H	486595621	1	-1.83263	2.26556	18.2211	1.97e-05	0.000602446	-1.75963	2.37008	16.0492	6.17e-05	0.000972194	-1.81786	2.62162	12.247	0.000465995	0.00388351
2:1:486787200	Hypo	2H	486787200	1	1.32448	2.68586	13.1557	0.000286648	0.00435043	1.40808	2.76679	16.0666	6.12e-05	0.000965727	1.44855	2.904	15.0466	0.000104889	0.001259
2:1:486811658	Hyper	2H	486811658	1	-1.24358	2.64124	15.1468	9.95e-05	0.00200932	-1.06599	2.73605	11.9123	0.000557645	0.00537673	-2.00303	2.89244	21.365	3.8e-06	9.65e-05
2:1:486887305	Hypo	2H	486887305	1	0.853196	4.07082	13.6579	0.000219318	0.00357855	0.925695	4.13458	15.2098	9.62e-05	0.00138459	0.932586	4.2655	12.3699	0.00043632	0.00369866
2:1:487326963	Hypo	2H	487326963	1	1.50145	2.74272	18.7849	1.46e-05	0.000481153	1.69638	2.86871	21.944	2.81e-06	8.5e-05	2.12479	3.14981	22.9978	1.62e-06	5.06e-05
2:1:487495745	Hyper	2H	487495745	1	-0.951377	3.5362	14.5893	0.000133668	0.0024906	-0.852322	3.60993	13.0528	0.000302823	0.00339192	-1.40716	3.77537	20.212	6.93e-06	0.000153626
2:1:487584466	Hypo	2H	487584466	1	0.971124	5.87776	41.8145	1e-10	5.48e-08	1.15452	6.01332	45.7917	1.32e-11	3.75e-09	1.23773	6.15119	43.8998	3.46e-11	1.16e-08
2:1:487928577	Hypo	2H	487928577	1	0.979006	4.50487	33.2464	8.12e-09	1.5e-06	0.952051	4.5003	25.211	5.14e-07	2.14e-05	0.652405	4.48897	10.1621	0.00143359	0.00907062
2:1:487947391	Hypo	2H	487947391	1	1.40635	2.41966	11.8283	0.000583381	0.00729383	1.56277	2.52987	14.3288	0.000153496	0.00200525	1.82448	2.74205	16.5959	4.63e-05	0.000676866
2:1:488210360	Hypo	2H	488210360	1	1.46762	3.03004	24.1395	8.96e-07	5.76e-05	1.46332	3.07565	16.0308	6.23e-05	0.000979136	1.60096	3.23916	17.4384	2.97e-05	0.000483266
2:1:488375490	Hypo	2H	488375490	1	0.665119	4.23963	13.1946	0.00028076	0.00428236	0.75666	4.30805	13.4062	0.000250795	0.00293807	0.894514	4.51275	16.7794	4.2e-05	0.000628841
2:1:488613898	Hypo	2H	488613898	1	1.43196	2.82337	23.8627	1.03e-06	6.45e-05	1.57048	2.9274	22.6805	1.91e-06	6.23e-05	1.42304	2.98769	13.6225	0.000223495	0.00223776
2:1:489240023	Hypo	2H	489240023	1	1.18384	2.85908	14.0157	0.000181295	0.00311434	1.38411	2.98343	18.7701	1.47e-05	0.000315152	1.49304	3.15517	15.4106	8.65e-05	0.00108489
2:1:489591420	Hypo	2H	489591420	1	1.28195	2.7522	12.4489	0.000418244	0.00572327	1.83622	3.03891	25.7927	3.8e-07	1.66e-05	1.90145	3.15402	31.1866	2.34e-08	1.86e-06
2:1:489699727	Hypo	2H	489699727	1	1.44907	2.69999	16.6888	4.4e-05	0.00109339	1.71355	2.85701	26.3569	2.84e-07	1.32e-05	1.39678	2.86444	11.7344	0.000613563	0.00479323
2:1:490246741	Hypo	2H	490246741	1	0.84655	5.5115	19.4082	1.06e-05	0.000379103	0.880091	5.5542	19.0357	1.28e-05	0.000282552	1.07705	5.78853	17.3959	3.03e-05	0.000491674
2:1:490445356	Hypo	2H	490445356	1	1.21979	3.50142	20.3773	6.36e-06	0.0002585	1.34967	3.59892	28.1303	1.13e-07	6.2e-06	1.5663	3.79943	28.4032	9.85e-08	5.71e-06
2:1:490548643	Hypo	2H	490548643	1	1.2692	4.3721	34.458	4.36e-09	9.5e-07	1.42623	4.48515	48.423	3.44e-12	1.29e-09	1.63718	4.69095	42.8205	6e-11	1.76e-08
2:1:491164728	Hypo	2H	491164728	1	1.00754	3.54006	17.4629	2.93e-05	0.000809522	1.07222	3.60162	22.0078	2.72e-06	8.26e-05	1.17154	3.76827	22.1061	2.58e-06	7.2e-05
2:1:492363052	Hypo	2H	492363052	1	1.038	3.02066	12.9944	0.000312423	0.00463295	1.31753	3.18374	19.592	9.59e-06	0.0002256	1.54843	3.39123	21.9051	2.86e-06	7.78e-05
2:1:492794913	Hypo	2H	492794913	1	0.868591	4.59497	17.8503	2.39e-05	0.000696538	1.13306	4.77773	28.6916	8.49e-08	4.9e-06	1.38105	5.01255	36.9911	1.19e-09	1.8e-07
2:1:493296818	Hypo	2H	493296818	1	0.903179	3.60044	11.9393	0.000549626	0.00698392	1.1556	3.76099	20.0053	7.72e-06	0.000190051	1.00848	3.80549	11.4858	0.00070131	0.00530166
2:1:493405096	Hypo	2H	493405096	1	1.02933	3.7583	16.2167	5.65e-05	0.00131787	1.43236	4.00916	36.083	1.89e-09	2.12e-07	1.22596	3.99869	18.9974	1.31e-05	0.000254414
2:1:493808567	Hyper	2H	493808567	1	-1.23021	2.94212	17.9735	2.24e-05	0.000662769	-1.03334	3.04726	11.113	0.000857236	0.00744613	-1.31228	3.27485	13.3728	0.000255298	0.00246726
2:1:493855475	Hypo	2H	493855475	1	1.27588	2.73206	15.717	7.36e-05	0.0016168	1.36428	2.80765	13.1555	0.000286675	0.00325479	1.97601	3.1682	25.1841	5.21e-07	2.08e-05
2:1:493875653	Hyper	2H	493875653	1	-1.38869	2.87777	21.0317	4.52e-06	0.000199505	-1.08928	3.00069	12.5777	0.000390377	0.00411721	-1.42712	3.22143	13.3843	0.000253743	0.00245664
2:1:494015802	Hypo	2H	494015802	1	0.930058	3.37725	12.4769	0.000412011	0.00566327	1.10082	3.49114	21.1289	4.29e-06	0.000119428	1.20188	3.6621	15.0438	0.000105047	0.00126056
2:1:494440810	Hypo	2H	494440810	1	1.3934	4.33223	51.7425	6.33e-13	1.26e-09	1.3739	4.3379	42.1224	8.57e-11	1.7e-08	1.52033	4.51571	36.0632	1.91e-09	2.63e-07
2:1:495123602	Hypo	2H	495123602	1	0.810608	3.81585	12.9332	0.00032281	0.0047462	1.06555	3.97377	19.2864	1.13e-05	0.000255855	1.1117	4.11428	16.398	5.13e-05	0.000734071
2:1:495515061	Hypo	2H	495515061	1	1.85878	2.60738	18.8234	1.43e-05	0.000474648	1.46175	2.52929	14.5027	0.000139956	0.00186496	2.19492	2.89382	23.2744	1.4e-06	4.54e-05
2:1:495525130	Hypo	2H	495525130	1	1.14834	3.49925	16.5949	4.63e-05	0.00112952	1.22652	3.5731	20.0344	7.61e-06	0.000187733	1.65913	3.88569	31.8475	1.67e-08	1.42e-06
2:1:495547801	Hypo	2H	495547801	1	1.2026	3.17289	18.3173	1.87e-05	0.000581034	1.62971	3.42644	31.5215	1.97e-08	1.46e-06	1.73208	3.58291	23.945	9.91e-07	3.45e-05
2:1:495572617	Hypo	2H	495572617	1	1.27836	2.53101	11.9173	0.000556153	0.00704664	1.76959	2.75382	19.2597	1.14e-05	0.000258305	2.00953	2.96482	29.0998	6.87e-08	4.25e-06
2:1:495680768	Hypo	2H	495680768	1	1.36258	3.73867	24.519	7.36e-07	4.93e-05	1.89484	4.07764	58.8703	1.68e-14	2.23e-11	1.71637	4.04445	31.1185	2.43e-08	1.92e-06
2:1:495820243	Hypo	2H	495820243	1	0.85221	4.47762	15.5945	7.85e-05	0.00169742	1.15767	4.67947	26.9415	2.1e-07	1.03e-05	1.03519	4.71279	18.4231	1.77e-05	0.000321438
2:1:495823645	Hypo	2H	495823645	1	1.143	5.06533	42.6192	6.65e-11	4.08e-08	1.19046	5.11403	40.9073	1.6e-10	2.78e-08	1.21008	5.2159	33.1356	8.6e-09	8.41e-07
2:1:496293156	Hypo	2H	496293156	1	1.00189	3.85424	18.9697	1.33e-05	0.000449623	1.50906	4.16786	44.5101	2.53e-11	6.42e-09	1.49094	4.24423	30.6555	3.08e-08	2.31e-06
2:1:496482621	Hypo	2H	496482621	1	1.31219	2.83611	17.2499	3.28e-05	0.000879382	1.43501	2.93694	18.852	1.41e-05	0.000304646	1.98983	3.29944	27.3503	1.7e-07	8.64e-06
2:1:496484597	Hypo	2H	496484597	1	0.924071	3.34004	13.3681	0.000255946	0.00401075	1.26996	3.54392	22.2244	2.43e-06	7.57e-05	1.3108	3.67738	19.5804	9.65e-06	0.000199436
2:1:496676084	Hypo	2H	496676084	1	1.51949	3.7495	36.0273	1.95e-09	5.06e-07	1.77002	3.91934	51.2519	8.12e-13	4.05e-10	1.66829	3.93877	30.8048	2.85e-08	2.18e-06
2:1:496747481	Hypo	2H	496747481	1	0.934073	3.66216	14.9012	0.000113293	0.00220153	1.18118	3.81983	23.0951	1.54e-06	5.24e-05	1.06056	3.86873	14.0658	0.000176522	0.00186743
2:1:496904926	Hypo	2H	496904926	1	1.19252	3.39087	20.0553	7.52e-06	0.000294487	1.46302	3.56876	38.7615	4.79e-10	6.9e-08	1.21702	3.54572	17.0447	3.65e-05	0.000564733
2:1:498233050	Hypo	2H	498233050	1	0.991685	3.69553	20.9996	4.59e-06	0.000202124	1.17402	3.82103	23.1899	1.47e-06	5.04e-05	1.11942	3.90516	19.8701	8.29e-06	0.000176526
2:1:498233503	Hypo	2H	498233503	1	1.55171	3.78657	38.2116	6.35e-10	2.22e-07	1.77313	3.94177	41.2086	1.37e-10	2.46e-08	1.45493	3.84758	20.8094	5.07e-06	0.000120881
2:1:498604724	Hypo	2H	498604724	1	1.07974	4.77939	31.3797	2.12e-08	3.17e-06	1.41485	5.01413	49.1169	2.41e-12	9.67e-10	1.23465	4.99097	23.8615	1.04e-06	3.57e-05
2:1:498804571	Hypo	2H	498804571	1	1.25766	3.07772	19.3478	1.09e-05	0.000387103	1.31776	3.14171	21.1811	4.18e-06	0.000116972	1.73642	3.43929	25.755	3.88e-07	1.66e-05
2:1:499078778	Hypo	2H	499078778	1	1.53135	2.67692	14.0692	0.000176202	0.00305107	1.49937	2.7136	16.6991	4.38e-05	0.000745561	2.11038	3.06307	26.0815	3.27e-07	1.45e-05
2:1:499242049	Hypo	2H	499242049	1	1.25964	3.14269	17.5928	2.74e-05	0.000771449	1.40715	3.2437	25.3309	4.83e-07	2.03e-05	1.40737	3.36174	15.0876	0.000102634	0.00123916
2:1:499818626	Hypo	2H	499818626	1	1.17637	2.81456	11.534	0.000683345	0.00814262	1.44942	2.9705	18.3594	1.83e-05	0.000374185	1.28228	3.03092	11.372	0.000745588	0.00554576
2:1:501121225	Hypo	2H	501121225	1	1.26442	3.18418	18.8466	1.42e-05	0.000471208	1.33332	3.26034	17.8546	2.38e-05	0.000462375	1.63305	3.51211	21.4893	3.56e-06	9.21e-05
2:1:501294974	Hypo	2H	501294974	1	1.01841	3.23373	14.4486	0.000144035	0.00263388	1.35745	3.43605	32.9521	9.45e-09	7.81e-07	1.53701	3.61512	29.5807	5.36e-08	3.52e-06
2:1:501954920	Hypo	2H	501954920	1	0.702506	4.3605	15.7401	7.27e-05	0.00160196	0.959759	4.5236	26.7575	2.31e-07	1.11e-05	0.728345	4.53097	10.0953	0.00148649	0.00932197
2:1:502359113	Hyper	2H	502359113	1	-0.891808	3.04909	11.2162	0.000810875	0.00920179	-1.11604	3.06654	15.1682	9.83e-05	0.00140931	-1.39812	3.28968	15.4683	8.39e-05	0.00106073
2:1:502695795	Hypo	2H	502695795	1	1.69903	3.08683	28.3599	1.01e-07	1.08e-05	1.53919	3.04434	23.551	1.22e-06	4.3e-05	1.50257	3.14545	12.4166	0.000425537	0.00362907
2:1:502760496	Hypo	2H	502760496	1	1.5315	2.58791	18.6005	1.61e-05	0.000516693	1.62951	2.67297	18.24	1.95e-05	0.000393706	1.53525	2.75956	10.9888	0.000916644	0.00645173
2:1:503175605	Hypo	2H	503175605	1	0.897624	3.75515	16.1081	5.98e-05	0.00137915	1.02533	3.84509	19.2121	1.17e-05	0.000263457	0.871549	3.89715	10.3747	0.00127753	0.00830764
2:1:503566365	Hyper	2H	503566365	1	-0.761936	4.54117	14.0811	0.000175096	0.00303766	-1.11825	4.46255	29.4929	5.61e-08	3.48e-06	-1.23826	4.7425	20.7449	5.25e-06	0.00012412
2:1:503884005	Hypo	2H	503884005	1	0.772474	4.49987	14.1662	0.000167351	0.0029423	1.25384	4.80628	40.2423	2.24e-10	3.63e-08	0.899365	4.71996	14.0929	0.000173997	0.00184747
2:2:504212397	Hypo	2H	504212397	2	1.2321	2.70704	12.8492	0.000337632	0.00489846	1.25636	2.77485	12.0129	0.000528338	0.00516459	1.4897	2.99815	11.8978	0.000562005	0.00447654
2:1:504611372	Hypo	2H	504611372	1	0.841182	7.23661	24.4515	7.62e-07	5.07e-05	0.750905	7.20531	17.4506	2.95e-05	0.000547449	0.739509	7.32053	12.2605	0.00046264	0.00386143
2:1:504896945	Hyper	2H	504896945	1	-1.60851	3.39476	46.3624	9.83e-12	9.99e-09	-1.32154	3.50509	28.3662	1e-07	5.63e-06	-1.45805	3.77976	26.5012	2.63e-07	1.21e-05
2:1:507042299	Hypo	2H	507042299	1	1.17831	3.49953	16.5513	4.74e-05	0.00114989	1.75857	3.85335	46.0014	1.18e-11	3.42e-09	1.61376	3.84619	27.79	1.35e-07	7.27e-06
2:1:507101430	Hyper	2H	507101430	1	-1.57132	2.61533	21.4825	3.57e-06	0.000166399	-1.14059	2.75612	11.7324	0.000614219	0.00578169	-1.79833	2.93961	15.4862	8.31e-05	0.00105356
2:1:507520583	Hypo	2H	507520583	1	1.05742	3.92208	18.1083	2.09e-05	0.000629989	1.40824	4.14677	35.0746	3.17e-09	3.25e-07	1.74932	4.42314	43.7692	3.69e-11	1.22e-08
2:1:507530311	Hypo	2H	507530311	1	0.790302	5.92646	31.7598	1.74e-08	2.71e-06	0.775886	5.93446	24.5337	7.3e-07	2.83e-05	0.811713	6.07704	21.4226	3.68e-06	9.44e-05
2:1:507740413	Hypo	2H	507740413	1	1.49796	3.50809	24.7571	6.5e-07	4.5e-05	1.70697	3.6502	33.9218	5.74e-09	5.18e-07	2.02314	3.90003	38.2471	6.23e-10	1.08e-07
2:1:507752473	Hypo	2H	507752473	1	0.950971	3.06697	12.6209	0.00038146	0.00535748	1.17067	3.20732	14.4928	0.000140698	0.0018718	1.5237	3.47259	24.2599	8.42e-07	3.04e-05
2:1:508272554	Hypo	2H	508272554	1	1.33482	2.52482	12.5101	0.000404761	0.00559008	1.58486	2.66374	15.8337	6.92e-05	0.00106427	1.64149	2.81338	13.4625	0.000243377	0.00238204
2:1:508534491	Hypo	2H	508534491	1	0.964261	4.13871	27.2314	1.8e-07	1.69e-05	0.755651	4.04913	12.7604	0.000354027	0.0038259	0.858671	4.23028	12.6076	0.000384173	0.00335693
2:1:508743082	Hypo	2H	508743082	1	1.34253	3.03512	16.4139	5.09e-05	0.00121356	1.49495	3.14212	21.9107	2.86e-06	8.62e-05	1.45229	3.2506	13.5616	0.000230863	0.00229316
2:1:508754522	Hypo	2H	508754522	1	1.27948	3.24977	20.0164	7.68e-06	0.000299145	1.31195	3.30028	18.9406	1.35e-05	0.000294181	1.86511	3.66924	32.7547	1.05e-08	9.8e-07
2:1:509223623	Hypo	2H	509223623	1	0.99832	4.33624	18.1914	2e-05	0.000609434	1.16519	4.45937	24.0001	9.63e-07	3.54e-05	1.40599	4.68731	30.9435	2.66e-08	2.06e-06
2:1:509650907	Hypo	2H	509650907	1	1.17397	3.54392	21.8179	3e-06	0.000145217	1.29739	3.63589	23.8356	1.05e-06	3.79e-05	1.64733	3.91167	31.7001	1.8e-08	1.52e-06
2:1:510730832	Hypo	2H	510730832	1	1.5931	2.77334	19.7721	8.72e-06	0.000329246	1.59967	2.82489	17.6812	2.61e-05	0.000497683	1.87813	3.03644	18.3186	1.87e-05	0.000335157
2:1:510787034	Hypo	2H	510787034	1	1.09905	3.31049	14.936	0.000111218	0.00217538	1.57823	3.58056	27.82	1.33e-07	7.09e-06	1.58831	3.68177	25.0939	5.46e-07	2.16e-05
2:1:511947260	Hypo	2H	511947260	1	1.17533	3.05684	13.7609	0.000207618	0.00343662	1.34165	3.17028	19.1595	1.2e-05	0.000269187	1.84653	3.50658	32.4254	1.24e-08	1.12e-06
2:1:512267765	Hypo	2H	512267765	1	0.988376	5.2937	32.7158	1.07e-08	1.88e-06	1.12283	5.39758	42.4072	7.41e-11	1.52e-08	1.00374	5.43046	26.8509	2.2e-07	1.06e-05
2:1:512477200	Hypo	2H	512477200	1	1.24942	3.14081	18.2896	1.9e-05	0.000587709	1.55308	3.32297	29.5487	5.45e-08	3.39e-06	2.02786	3.65394	28.8728	7.73e-08	4.69e-06
2:1:512825680	Hyper	2H	512825680	1	-1.28541	2.43482	11.4805	0.000703289	0.00830629	-1.25203	2.52018	10.9178	0.000952465	0.00806901	-2.09462	2.70872	16.8904	3.96e-05	0.000601343
2:1:513106356	Hypo	2H	513106356	1	1.20022	2.92476	13.8501	0.000197985	0.0033187	1.03944	2.908	12.3076	0.000451126	0.00458664	1.62437	3.25984	20.8764	4.9e-06	0.000117664
2:1:513519397	Hypo	2H	513519397	1	0.812245	5.15771	21.6833	3.22e-06	0.00015364	0.927086	5.24953	24.1745	8.8e-07	3.29e-05	0.773156	5.28739	12.5988	0.000385999	0.00336753
2:1:515863628	Hypo	2H	515863628	1	0.727711	3.58393	11.5766	0.000667861	0.00801669	0.798262	3.6472	11.3957	0.000736142	0.00662108	0.954502	3.84126	10.5573	0.00115729	0.0076826
2:1:515935977	Hyper	2H	515935977	1	-1.38649	3.96648	40.2454	2.24e-10	1e-07	-0.902021	4.12812	13.822	0.000200968	0.00247726	-1.50568	4.30162	27.4724	1.59e-07	8.24e-06
2:1:516531328	Hypo	2H	516531328	1	0.997097	3.44069	15.0807	0.000103014	0.00206275	0.899156	3.43149	12.7125	0.000363226	0.00390104	1.39475	3.77001	27.4984	1.57e-07	8.16e-06
2:1:517146151	Hypo	2H	517146151	1	1.12553	3.09056	16.3129	5.37e-05	0.00126479	1.06897	3.10527	13.2506	0.000272494	0.00313004	1.43596	3.38582	16.6228	4.56e-05	0.000669634
2:1:517663955	Hyper	2H	517663955	1	-1.17949	3.07671	18.0606	2.14e-05	0.000642242	-1.15218	3.15468	16.5945	4.63e-05	0.000778845	-1.28706	3.39511	15.6971	7.43e-05	0.00097132
2:1:517948969	Hyper	2H	517948969	1	-1.16906	3.06375	17.228	3.32e-05	0.000886399	-0.942531	3.17256	10.635	0.0011097	0.00905893	-1.25092	3.38798	13.3651	0.000256355	0.00247345
2:1:518469870	Hypo	2H	518469870	1	1.11553	4.85966	41.1111	1.44e-10	7.35e-08	1.26554	4.97511	44.3014	2.82e-11	6.92e-09	1.4425	5.16784	45.8028	1.31e-11	5.46e-09
2:1:518719530	Hypo	2H	518719530	1	1.59314	2.5591	19.102	1.24e-05	0.000424806	1.30856	2.52356	10.4815	0.00120574	0.00964718	1.64372	2.75588	13.5877	0.000227678	0.00226974
2:1:519581580	Hypo	2H	519581580	1	1.01649	4.31701	29.3821	5.94e-08	7.19e-06	1.16691	4.43089	32.7999	1.02e-08	8.33e-07	1.0393	4.47834	18.8967	1.38e-05	0.000265526
2:1:521506153	Hypo	2H	521506153	1	1.30903	2.65289	12.8629	0.000335163	0.00487623	1.45279	2.76034	16.4575	4.98e-05	0.000822611	1.494	2.89623	13.3613	0.000256866	0.00247716
2:1:522088960	Hypo	2H	522088960	1	0.814799	5.43725	29.6881	5.07e-08	6.38e-06	0.836665	5.47472	21.5164	3.51e-06	0.000101797	1.01373	5.69031	28.0942	1.16e-07	6.47e-06
2:1:522158597	Hypo	2H	522158597	1	1.59644	3.99624	46.8951	7.49e-12	8.33e-09	1.74262	4.1047	47.8066	4.7e-12	1.64e-09	2.03851	4.3422	63.3424	1.74e-15	5.91e-12
2:1:522177349	Hypo	2H	522177349	1	0.757828	6.24016	17.2495	3.28e-05	0.000879384	0.893146	6.34828	18.5484	1.66e-05	0.000345407	0.945233	6.4912	19.4397	1.04e-05	0.000211057
2:1:522249603	Hyper	2H	522249603	1	-0.763764	6.20663	26.4853	2.66e-07	2.26e-05	-0.819712	6.19917	22.7813	1.82e-06	5.99e-05	-1.73721	6.28871	67.5714	2.03e-16	1.18e-12
2:1:522905893	Hypo	2H	522905893	1	1.64943	2.61083	18.322	1.87e-05	0.000579743	1.74327	2.70259	20.1695	7.09e-06	0.000177259	2.08733	2.93324	30.0669	4.17e-08	2.88e-06
2:1:523079537	Hypo	2H	523079537	1	1.53998	3.06327	24.7243	6.61e-07	4.55e-05	1.66547	3.15829	29.4771	5.66e-08	3.5e-06	2.09012	3.47125	31.1603	2.38e-08	1.88e-06
2:1:523336468	Hypo	2H	523336468	1	1.81676	3.2603	36.5299	1.5e-09	4.21e-07	1.64244	3.20535	26.9721	2.06e-07	1.01e-05	1.58893	3.27862	21.0796	4.41e-06	0.00010849
2:1:523601613	Hypo	2H	523601613	1	0.786924	4.44047	13.0643	0.000300976	0.00450586	1.00933	4.59466	20.8541	4.96e-06	0.000133701	0.805868	4.60929	10.2565	0.00136206	0.00872512
2:1:523645194	Hypo	2H	523645194	1	1.20337	2.90539	13.3176	0.000262927	0.00408617	1.27794	2.98404	13.4471	0.000245387	0.00288515	1.14304	3.05907	10.6137	0.00112253	0.00751505
2:1:523672899	Hypo	2H	523672899	1	1.12286	3.14952	12.1126	0.000500829	0.00652552	1.49587	3.36064	25.9251	3.55e-07	1.57e-05	1.30999	3.38273	15.0721	0.000103481	0.0012468
2:2:523861876	Hyper	2H	523861876	2	-1.05997	6.37282	49.7939	1.71e-12	2.58e-09	-1.13618	6.36257	40.6784	1.79e-10	3.03e-08	-1.31867	6.63264	46.0829	1.13e-11	4.89e-09
2:1:524091525	Hypo	2H	524091525	1	1.29574	2.80223	17.2267	3.32e-05	0.000886787	1.71938	3.02774	26.0431	3.34e-07	1.5e-05	1.95214	3.21788	19.3243	1.1e-05	0.000221597
2:1:524603415	Hypo	2H	524603415	1	0.8094	4.11811	19.3686	1.08e-05	0.000384077	0.866632	4.16898	15.4379	8.53e-05	0.00125496	0.833318	4.28354	11.4321	0.000721871	0.00542116
2:1:525271486	Hyper	2H	525271486	1	-0.804998	3.47608	11.6744	0.000633646	0.00772925	-1.05122	3.46085	17.6104	2.71e-05	0.000512624	-1.00397	3.74947	11.3969	0.000735677	0.00549956
2:1:525365936	Hypo	2H	525365936	1	0.818695	4.01536	11.1892	0.000822761	0.00928623	0.854092	4.06179	12.3311	0.000445474	0.00454304	0.850029	4.18863	10.4029	0.00125818	0.00820664
2:1:525415075	Hypo	2H	525415075	1	1.53505	3.66424	35.6899	2.31e-09	5.82e-07	1.91635	3.91115	49.2262	2.28e-12	9.3e-10	1.88893	3.96417	37.9409	7.29e-10	1.22e-07
2:1:527625702	Hypo	2H	527625702	1	1.25264	5.38016	48.9099	2.68e-12	3.75e-09	1.32939	5.44654	55.2895	1.04e-13	8.86e-11	1.22092	5.46757	34.4062	4.47e-09	5.09e-07
2:1:528037291	Hyper	2H	528037291	1	-1.20275	3.15664	15.2361	9.49e-05	0.00194517	-1.05781	3.23687	10.966	0.000927979	0.00791272	-2.36282	3.37365	30.7693	2.91e-08	2.2e-06
2:1:530056698	Hypo	2H	530056698	1	1.01097	3.53076	16.4057	5.11e-05	0.00121708	1.11302	3.60552	19.1115	1.23e-05	0.00027426	1.09413	3.71908	14.5816	0.000134217	0.00151782
2:1:530403992	Hypo	2H	530403992	1	1.82384	3.35769	41.6419	1.1e-10	5.91e-08	1.72737	3.32917	39.4509	3.36e-10	5.08e-08	2.15546	3.65125	40.6404	1.83e-10	4.23e-08
2:1:530809985	Hypo	2H	530809985	1	1.07132	5.63699	48.1946	3.86e-12	5.11e-09	1.05019	5.63907	38.5053	5.46e-10	7.68e-08	1.01716	5.72154	30.3712	3.57e-08	2.57e-06
2:1:530908186	Hypo	2H	530908186	1	0.86299	3.53734	11.0237	0.000899532	0.00988575	1.2435	3.75696	26.8007	2.26e-07	1.09e-05	1.0728	3.79122	13.1589	0.00028616	0.00269311
2:1:531951861	Hypo	2H	531951861	1	1.38244	2.32356	12.3678	0.000436796	0.00591048	1.6229	2.46685	13.4864	0.000240303	0.00284247	1.58626	2.5879	12.8837	0.000331449	0.0030053
2:1:532337011	Hypo	2H	532337011	1	1.17567	2.93088	13.3005	0.000265334	0.0041124	1.2059	2.98576	14.1328	0.00017035	0.00217835	1.50915	3.22829	18.3677	1.82e-05	0.000328838
2:1:532699200	Hypo	2H	532699200	1	0.933677	3.48842	13.5525	0.00023198	0.00373247	0.821222	3.46615	12.282	0.000457336	0.00463362	1.69472	4.04946	18.4251	1.77e-05	0.000321311
2:1:533371085	Hypo	2H	533371085	1	0.709081	8.35126	37.1852	1.07e-09	3.23e-07	0.765187	8.40497	25.6022	4.2e-07	1.81e-05	0.696099	8.49646	14.4274	0.000145668	0.00161273
2:1:533422758	Hypo	2H	533422758	1	0.884148	3.55632	11.9082	0.000558872	0.00706755	1.01401	3.65815	13.5282	0.000234999	0.00279258	1.26995	3.9047	15.7416	7.26e-05	0.000954695
2:1:533495438	Hyper	2H	533495438	1	-0.959719	3.37825	14.8386	0.000117114	0.00225552	-1.37092	3.35324	25.8212	3.75e-07	1.64e-05	-1.23593	3.64919	16.4552	4.98e-05	0.000716504
2:1:534311691	Hypo	2H	534311691	1	1.293	2.88099	14.5085	0.000139527	0.00257204	1.57043	3.04417	25.792	3.8e-07	1.66e-05	1.63921	3.17835	21.2042	4.13e-06	0.000102994
2:1:534458840	Hypo	2H	534458840	1	1.19933	4.36951	31.3298	2.18e-08	3.24e-06	1.60685	4.64616	54.4726	1.58e-13	1.19e-10	1.33856	4.56996	24.0737	9.27e-07	3.27e-05
2:1:534753659	Hypo	2H	534753659	1	0.567105	6.44028	11.5774	0.00066758	0.00801575	0.78533	6.59347	16.8382	4.07e-05	0.000704578	1.09009	6.89349	24.4219	7.74e-07	2.84e-05
2:1:535120626	Hypo	2H	535120626	1	1.332	2.90541	15.668	7.55e-05	0.00164984	1.44639	2.99716	21.1471	4.25e-06	0.000118609	1.73134	3.22398	21.1398	4.27e-06	0.000105927
2:1:535519161	Hypo	2H	535519161	1	1.11225	3.59634	23.4112	1.31e-06	7.61e-05	0.871931	3.50659	12.5605	0.000393995	0.00414449	1.32742	3.83895	25.3599	4.76e-07	1.95e-05
2:1:535811530	Hypo	2H	535811530	1	0.706031	5.33634	13.244	0.000273448	0.00420529	0.977579	5.52237	26.5747	2.54e-07	1.2e-05	1.01875	5.65687	19.653	9.29e-06	0.000193623
2:1:535891574	Hypo	2H	535891574	1	1.272	3.28826	19.3364	1.1e-05	0.000388835	1.22688	3.31067	15.6611	7.58e-05	0.00114052	1.81626	3.70197	30.2236	3.85e-08	2.7e-06
2:1:535976057	Hypo	2H	535976057	1	1.13505	4.06032	22.1366	2.54e-06	0.000127895	1.49015	4.29236	41.5854	1.13e-10	2.11e-08	1.26951	4.26465	22.698	1.9e-06	5.7e-05
2:1:537163588	Hypo	2H	537163588	1	1.67682	2.76233	19.8395	8.42e-06	0.000321173	2.1211	2.99971	42.3306	7.71e-11	1.56e-08	2.25643	3.17991	25.3292	4.83e-07	1.97e-05
2:1:538067728	Hypo	2H	538067728	1	0.767788	6.92448	21.0924	4.38e-06	0.000194797	0.816877	6.98264	20.6855	5.41e-06	0.000143323	0.753755	7.06779	12.3032	0.00045217	0.0037978
2:1:538424954	Hypo	2H	538424954	1	0.892793	6.9555	40.2029	2.29e-10	1.02e-07	0.938611	7.00257	34.2482	4.85e-09	4.52e-07	0.889421	7.08891	23.6683	1.14e-06	3.86e-05
2:1:538955315	Hyper	2H	538955315	1	-1.3753	3.22813	30.5218	3.3e-08	4.48e-06	-0.883686	3.39862	13.634	0.000222132	0.00267427	-1.74031	3.53335	30.0327	4.25e-08	2.92e-06
2:1:539101330	Hypo	2H	539101330	1	1.13818	4.12517	20.9329	4.76e-06	0.000207908	1.15705	4.16008	23.9814	9.73e-07	3.57e-05	1.08358	4.22775	15.573	7.94e-05	0.00101885
2:1:539189394	Hyper	2H	539189394	1	-1.85558	2.35816	19.6964	9.08e-06	0.000338695	-1.57138	2.47099	14.3917	0.000148458	0.00195454	-2.06896	2.70776	15.6366	7.68e-05	0.000994409
2:1:539207631	Hypo	2H	539207631	1	1.16095	3.94552	25.9127	3.57e-07	2.86e-05	1.67984	4.27763	55.6738	8.56e-14	7.74e-11	1.80388	4.4256	46.3819	9.73e-12	4.39e-09
2:1:539528957	Hypo	2H	539528957	1	0.699341	6.45565	15.4379	8.53e-05	0.00180217	0.849852	6.57084	23.0972	1.54e-06	5.23e-05	0.970031	6.75564	19.8464	8.39e-06	0.00017819
2:1:539687017	Hypo	2H	539687017	1	1.07348	2.83467	11.8097	0.000589232	0.00734307	1.53926	3.07543	24.8215	6.29e-07	2.51e-05	1.97864	3.38747	24.5902	7.09e-07	2.66e-05
2:1:539872943	Hyper	2H	539872943	1	-0.635011	5.46512	17.1752	3.41e-05	0.000905282	-0.653094	5.46646	16.305	5.39e-05	0.000874657	-1.07349	5.63945	23.3421	1.36e-06	4.41e-05
2:1:539895610	Hypo	2H	539895610	1	0.922114	4.89422	27.8713	1.3e-07	1.31e-05	1.07593	5.01106	30.7166	2.99e-08	2.07e-06	1.33045	5.25373	38.5793	5.26e-10	9.49e-08
2:1:539910348	Hypo	2H	539910348	1	1.85337	2.61202	19.2364	1.15e-05	0.000404434	1.69779	2.61295	21.9379	2.82e-06	8.52e-05	2.24543	2.91423	21.7405	3.12e-06	8.34e-05
2:1:539967720	Hypo	2H	539967720	1	1.35067	2.43228	12.2153	0.000473993	0.00627754	1.744	2.62906	19.124	1.22e-05	0.0002729	1.8106	2.7681	18.0965	2.1e-05	0.000367994
2:1:540020763	Hypo	2H	540020763	1	0.586347	5.67793	14.3186	0.000154331	0.00276734	0.733123	5.78711	25.7926	3.8e-07	1.66e-05	0.671916	5.88477	14.5856	0.000133933	0.00151566
2:1:540592623	Hyper	2H	540592623	1	-1.04128	2.81466	12.8983	0.000328881	0.00481421	-0.95901	2.89051	11.0153	0.000903612	0.00775369	-1.47708	3.08149	14.658	0.000128887	0.00147478
2:1:540658045	Hypo	2H	540658045	1	0.981524	3.07821	11.1746	0.000829237	0.00933596	1.43961	3.31922	30.4757	3.38e-08	2.28e-06	1.43157	3.45739	14.7329	0.000123863	0.00142917
2:1:540664065	Hypo	2H	540664065	1	0.779166	3.88568	11.5487	0.000677974	0.00810328	0.974634	4.01603	18.2085	1.98e-05	0.000398608	0.989546	4.15067	11.9335	0.000551335	0.00441292
2:1:541660375	Hypo	2H	541660375	1	1.069	5.19665	44.2553	2.88e-11	2.21e-08	1.08929	5.22969	40.6325	1.84e-10	3.09e-08	1.19556	5.38778	37.2955	1.02e-09	1.59e-07
2:1:541765949	Hyper	2H	541765949	1	-1.1423	2.89368	13.9126	0.000191507	0.00324114	-1.40027	2.91123	18.8839	1.39e-05	0.000300917	-2.41847	3.1054	30.3846	3.54e-08	2.56e-06
2:1:542447529	Hypo	2H	542447529	1	1.41949	3.3772	24.2688	8.38e-07	5.46e-05	1.15275	3.27803	15.5307	8.12e-05	0.00120609	1.39835	3.50142	21.1845	4.17e-06	0.000103795
2:1:542535714	Hypo	2H	542535714	1	1.29162	4.70881	45.8955	1.25e-11	1.19e-08	1.53296	4.88312	53.1444	3.1e-13	1.93e-10	1.37362	4.86407	27.5357	1.54e-07	8.03e-06
2:1:542603436	Hypo	2H	542603436	1	1.41684	3.84706	30.9643	2.63e-08	3.73e-06	1.56405	3.95155	46.3463	9.91e-12	2.98e-09	1.94458	4.25466	48.3421	3.58e-12	1.99e-09
2:1:542617654	Hypo	2H	542617654	1	0.764373	5.35609	23.0749	1.56e-06	8.69e-05	1.10834	5.5878	38.6114	5.17e-10	7.36e-08	1.237	5.76682	36.8313	1.29e-09	1.92e-07
2:1:543164122	Hypo	2H	543164122	1	1.98164	2.63678	27.5977	1.49e-07	1.46e-05	1.66697	2.57785	16.4639	4.96e-05	0.000820576	2.93503	3.19993	56.4612	5.73e-14	8.08e-11
2:1:544003363	Hypo	2H	544003363	1	1.8464	2.36895	17.6549	2.65e-05	0.000753432	1.93315	2.45645	17.1412	3.47e-05	0.000622747	2.51953	2.77035	32.2647	1.35e-08	1.2e-06
2:1:544103611	Hypo	2H	544103611	1	1.1557	4.55085	28.2134	1.09e-07	1.14e-05	1.16151	4.57606	30.5098	3.32e-08	2.25e-06	1.18488	4.68939	20.1238	7.26e-06	0.000159237
2:1:544103677	Hypo	2H	544103677	1	1.54551	2.77209	22.9707	1.64e-06	9.08e-05	1.53852	2.81818	18.5097	1.69e-05	0.00035067	2.27969	3.25223	26.8288	2.22e-07	1.07e-05
2:1:544221227	Hypo	2H	544221227	1	1.82416	2.54224	27.1304	1.9e-07	1.75e-05	2.00051	2.66479	30.0179	4.28e-08	2.78e-06	2.57024	2.99287	33.5175	7.06e-09	7.24e-07
2:1:544682767	Hypo	2H	544682767	1	2.14713	3.30236	23.6648	1.15e-06	6.94e-05	1.99044	3.24471	19.4707	1.02e-05	0.000237179	2.65116	3.6542	41.9257	9.48e-11	2.54e-08
2:1:544682809	Hypo	2H	544682809	1	0.971377	4.64314	21.458	3.62e-06	0.000167945	0.996283	4.6816	20.887	4.87e-06	0.000131821	0.785287	4.69225	9.97977	0.0015827	0.00978299
2:1:544737207	Hypo	2H	544737207	1	1.14701	5.75612	46.1932	1.07e-11	1.05e-08	1.20295	5.81258	48.4346	3.41e-12	1.28e-09	1.11704	5.85175	27.2785	1.76e-07	8.9e-06
2:1:545048077	Hypo	2H	545048077	1	1.61931	2.81502	19.9096	8.12e-06	0.000312357	1.65221	2.86956	19.8605	8.33e-06	0.000202019	1.76903	3.03327	18.6012	1.61e-05	0.000298874
2:1:545308731	Hyper	2H	545308731	1	-0.824936	3.66767	11.6649	0.000636891	0.00775887	-1.16832	3.62755	17.2785	3.23e-05	0.000587745	-1.02598	3.93341	10.3901	0.0012669	0.00825101
2:1:545548194	Hypo	2H	545548194	1	1.2125	4.34316	16.9212	3.9e-05	0.00100047	1.37206	4.47343	26.7265	2.34e-07	1.12e-05	1.11031	4.4254	11.8399	0.000579745	0.00459107
2:1:545550512	Hypo	2H	545550512	1	1.00694	5.18536	29.7896	4.82e-08	6.08e-06	1.18983	5.32037	36.2768	1.71e-09	1.95e-07	0.950865	5.28638	18.1917	2e-05	0.000354065
2:1:545567863	Hypo	2H	545567863	1	1.4124	3.90228	28.9845	7.3e-08	8.44e-06	1.17827	3.79528	21.5962	3.37e-06	9.84e-05	0.980471	3.81787	11.8949	0.000562889	0.00448286
2:1:545604686	Hypo	2H	545604686	1	1.34308	3.88713	21.9568	2.79e-06	0.000137497	1.39366	3.93684	24.5595	7.21e-07	2.8e-05	1.32877	4.00736	16.321	5.35e-05	0.000754987
2:1:545702352	Hypo	2H	545702352	1	1.06503	3.27864	12.3279	0.000446231	0.00600334	1.41166	3.48031	27.6457	1.46e-07	7.6e-06	1.9095	3.83572	30.8531	2.78e-08	2.13e-06
2:1:546223540	Hypo	2H	546223540	1	0.529484	5.6832	12.7772	0.000350862	0.00504487	0.697577	5.79664	18.8676	1.4e-05	0.000302717	0.786525	5.97204	18	2.21e-05	0.000382462
2:1:546233247	Hyper	2H	546233247	1	-1.52324	2.3025	16.1869	5.74e-05	0.00133457	-1.3334	2.41753	12.1556	0.000489419	0.00487663	-1.83963	2.61758	14.7106	0.000125342	0.00144191
2:1:546305600	Hypo	2H	546305600	1	0.594691	5.49193	18.1271	2.07e-05	0.000625721	0.706655	5.56978	20.1463	7.17e-06	0.000179116	0.924044	5.81464	29.9125	4.52e-08	3.07e-06
2:1:547073927	Hypo	2H	547073927	1	0.745757	5.30671	15.2081	9.63e-05	0.00196381	1.13923	5.57108	37.1413	1.1e-09	1.33e-07	1.34544	5.78555	51.5614	6.94e-13	5.48e-10
2:1:547091360	Hypo	2H	547091360	1	0.874418	8.40965	22.32	2.31e-06	0.000118695	1.10378	8.58785	34.9575	3.37e-09	3.41e-07	1.24339	8.76562	25.1054	5.43e-07	2.15e-05
2:1:547216786	Hypo	2H	547216786	1	0.960444	4.29189	25.3131	4.87e-07	3.62e-05	1.22883	4.47036	39.531	3.23e-10	4.91e-08	1.37994	4.64668	35.3131	2.81e-09	3.54e-07
2:1:547953530	Hypo	2H	547953530	1	0.743882	4.51759	18.2277	1.96e-05	0.000601169	0.705785	4.5135	11.7888	0.00059588	0.00564711	0.95853	4.77355	20.4782	6.03e-06	0.000137729
2:1:548048487	Hypo	2H	548048487	1	1.06941	5.87829	27.224	1.81e-07	1.69e-05	1.10937	5.92755	28.2293	1.08e-07	5.95e-06	1.33785	6.1668	19.4252	1.05e-05	0.000212453
2:1:548067940	Hypo	2H	548067940	1	1.05036	8.18488	30.2106	3.88e-08	5.08e-06	1.22806	8.33303	39.6652	3.01e-10	4.65e-08	1.10847	8.34362	18.7173	1.52e-05	0.000285317
2:1:548386697	Hypo	2H	548386697	1	1.18255	5.51459	34.0409	5.4e-09	1.11e-06	1.27778	5.59431	34.4568	4.36e-09	4.18e-07	1.5875	5.8741	49.8816	1.63e-12	1.04e-09
2:1:548399698	Hyper	2H	548399698	1	-1.6645	2.78868	23.0205	1.6e-06	8.88e-05	-1.15583	2.93386	11.4027	0.000733363	0.00660418	-1.69882	3.1419	17.0347	3.67e-05	0.000566377
2:1:548425251	Hypo	2H	548425251	1	1.6861	2.98027	23.2905	1.39e-06	8.01e-05	1.63904	2.99558	21.4649	3.6e-06	0.000103871	1.96213	3.24588	20.7464	5.24e-06	0.000124055
2:1:548479059	Hypo	2H	548479059	1	1.59357	3.61571	26.6025	2.5e-07	2.16e-05	2.01404	3.89074	52.9068	3.5e-13	2.12e-10	2.30464	4.11433	48.7148	2.96e-12	1.67e-09
2:1:548590936	Hypo	2H	548590936	1	0.968209	4.04747	16.6933	4.39e-05	0.0010919	1.19547	4.19965	26.4524	2.7e-07	1.26e-05	0.917244	4.17718	11.6172	0.000653437	0.0050248
2:1:548622823	Hypo	2H	548622823	1	0.758428	4.58433	17.9325	2.29e-05	0.000672883	0.983729	4.73534	23.9696	9.79e-07	3.59e-05	1.04861	4.8781	23.474	1.27e-06	4.18e-05
2:1:548692501	Hypo	2H	548692501	1	1.2598	4.41706	38.5442	5.35e-10	1.9e-07	1.45141	4.5584	42.3739	7.54e-11	1.54e-08	1.49559	4.66327	35.3536	2.75e-09	3.48e-07
2:1:548721712	Hyper	2H	548721712	1	-1.15324	2.98331	15.0714	0.000103519	0.00206905	-1.16407	3.03387	13.5442	0.000233007	0.0027733	-1.47655	3.25906	15.2829	9.26e-05	0.00114317
2:2:548958430	Hyper	2H	548958430	2	-0.522405	6.467	14.1207	0.000171443	0.00299348	-0.57276	6.45489	17.4661	2.92e-05	0.000543781	-0.696155	6.68808	15.9065	6.65e-05	0.000894268
2:1:549220348	Hypo	2H	549220348	1	1.66493	3.01933	25.4939	4.44e-07	3.38e-05	1.76622	3.11029	30.5097	3.32e-08	2.25e-06	1.77902	3.20233	20.7413	5.26e-06	0.000124278
2:1:549334026	Hypo	2H	549334026	1	1.37502	2.73068	18.8168	1.44e-05	0.00047589	1.43741	2.79741	17.8076	2.44e-05	0.000471382	1.43886	2.92426	11.8826	0.000566599	0.00450695
2:1:549467403	Hypo	2H	549467403	1	1.32668	2.80027	13.1635	0.000285455	0.00433675	1.69591	3.00447	27.923	1.26e-07	6.79e-06	1.97927	3.23614	24.0951	9.17e-07	3.25e-05
2:1:549612104	Hypo	2H	549612104	1	1.50676	2.84069	17.756	2.51e-05	0.000724294	1.73569	2.99071	26.8352	2.22e-07	1.07e-05	2.03876	3.21129	25.8805	3.63e-07	1.57e-05
2:1:549802678	Hypo	2H	549802678	1	0.926573	5.03606	25.6774	4.04e-07	3.14e-05	0.979664	5.08677	25.1055	5.43e-07	2.23e-05	1.104	5.2597	25.8539	3.68e-07	1.59e-05
2:1:550336077	Hypo	2H	550336077	1	1.13397	2.56198	11.0448	0.000889354	0.00981091	1.51607	2.75699	18.2859	1.9e-05	0.00038566	2.11746	3.11701	30.8218	2.83e-08	2.16e-06
2:1:550536070	Hypo	2H	550536070	1	1.31486	3.05541	16.7518	4.26e-05	0.00106769	1.36933	3.10991	20.5021	5.96e-06	0.000154472	1.56943	3.31891	20.5055	5.95e-06	0.000136247
2:1:550571557	Hypo	2H	550571557	1	1.73315	3.02032	34.2734	4.79e-09	1.02e-06	2.02755	3.20545	49.5921	1.89e-12	8.03e-10	2.08797	3.32156	30.7039	3.01e-08	2.26e-06
2:1:550821849	Hypo	2H	550821849	1	0.641163	5.30293	13.1946	0.000280758	0.00428236	0.626295	5.31825	10.6387	0.00110744	0.00904499	0.673651	5.47596	10.0955	0.00148633	0.00932156
2:1:551284612	Hypo	2H	551284612	1	1.25318	3.72982	17.504	2.87e-05	0.000798862	1.11554	3.6764	13.8446	0.000198568	0.00245494	1.24389	3.85649	14.9772	0.000108819	0.00129578
2:1:551337980	Hypo	2H	551337980	1	1.29395	4.54438	31.9014	1.62e-08	2.56e-06	1.58631	4.75415	47.0395	6.96e-12	2.23e-09	1.37485	4.71693	22.9654	1.65e-06	5.12e-05
2:1:551390206	Hypo	2H	551390206	1	0.799821	5.03812	24.4628	7.58e-07	5.05e-05	0.815828	5.06346	21.6495	3.27e-06	9.62e-05	0.728896	5.14662	12.356	0.00043957	0.003716
2:1:551574277	Hypo	2H	551574277	1	1.26784	4.51376	28.7119	8.4e-08	9.47e-06	1.27369	4.53733	35.9123	2.06e-09	2.27e-07	1.1131	4.54491	21.9636	2.78e-06	7.6e-05
2:1:551737824	Hypo	2H	551737824	1	0.91645	5.9161	31.3255	2.18e-08	3.25e-06	1.01907	6.00088	32.4805	1.2e-08	9.53e-07	1.03564	6.12007	24.2969	8.26e-07	2.99e-05
2:1:552190774	Hypo	2H	552190774	1	1.05765	3.88209	16.3863	5.17e-05	0.00122473	1.51886	4.16643	39.126	3.97e-10	5.9e-08	1.33394	4.16537	17.6987	2.59e-05	0.000432711
2:1:552306158	Hypo	2H	552306158	1	0.816869	4.58738	14.6674	0.000128243	0.00241674	0.905158	4.66519	16.0487	6.17e-05	0.000972344	1.15613	4.907	20.612	5.62e-06	0.000130788
2:1:552402784	Hypo	2H	552402784	1	0.739243	4.40138	14.3769	0.000149629	0.00270625	0.985105	4.564	22.5448	2.05e-06	6.6e-05	0.85292	4.61594	12.622	0.000381239	0.00333632
2:1:553325830	Hypo	2H	553325830	1	1.09625	3.04457	13.3488	0.000258589	0.00404047	1.49613	3.25791	30.6408	3.1e-08	2.13e-06	1.45477	3.36632	17.2361	3.3e-05	0.000524445
2:1:553637033	Hyper	2H	553637033	1	-0.832513	4.27054	16.397	5.14e-05	0.00122098	-0.830639	4.30312	14.5459	0.000136787	0.00183337	-0.962915	4.55567	15.6548	7.6e-05	0.000987144
2:1:554099007	Hypo	2H	554099007	1	1.12412	4.94875	35.9702	2e-09	5.19e-07	1.3198	5.09392	46.5298	9.02e-12	2.76e-09	1.36141	5.19584	36.5255	1.51e-09	2.19e-07
2:1:554457031	Hypo	2H	554457031	1	1.13243	5.832	32.2989	1.32e-08	2.21e-06	1.35748	5.9994	44.4168	2.65e-11	6.66e-09	1.33428	6.08152	25.3766	4.72e-07	1.93e-05
2:1:554472119	Hypo	2H	554472119	1	1.04958	3.86566	24.049	9.39e-07	5.97e-05	1.20789	3.96658	23.1273	1.52e-06	5.17e-05	1.30617	4.11704	22.5149	2.09e-06	6.13e-05
2:1:554472167	Hypo	2H	554472167	1	1.11923	3.10906	12.4034	0.000428548	0.00582801	1.56596	3.36049	26.2114	3.06e-07	1.39e-05	1.77617	3.55623	23.4472	1.28e-06	4.22e-05
2:1:554495190	Hypo	2H	554495190	1	0.96802	6.05383	42.9226	5.69e-11	3.65e-08	1.01146	6.10102	36.5105	1.52e-09	1.77e-07	0.81774	6.09834	20.4426	6.14e-06	0.000139759
2:1:554528434	Hypo	2H	554528434	1	1.0192	5.23892	34.8115	3.63e-09	8.33e-07	1.3971	5.50001	72.0222	2.13e-17	1.92e-13	1.13043	5.43031	31.5456	1.95e-08	1.61e-06
2:1:554551504	Hypo	2H	554551504	1	1.40958	3.41428	24.03	9.48e-07	6e-05	1.45281	3.46866	24.4363	7.68e-07	2.95e-05	1.87997	3.77347	34.8078	3.64e-09	4.33e-07
2:1:554689656	Hypo	2H	554689656	1	0.866339	3.81621	13.681	0.00021663	0.00354879	1.24823	4.05006	25.8298	3.73e-07	1.64e-05	1.32684	4.19004	25.7829	3.82e-07	1.64e-05
2:1:554902373	Hypo	2H	554902373	1	0.612063	9.54809	17.2355	3.3e-05	0.000884091	0.745591	9.65472	21.4583	3.62e-06	0.00010415	0.684278	9.74924	11.3157	0.000768561	0.00566642
2:1:555113492	Hypo	2H	555113492	1	0.668873	5.56028	22.9791	1.64e-06	9.05e-05	0.886743	5.70866	29.3058	6.18e-08	3.76e-06	0.948832	5.85813	28.4301	9.71e-08	5.64e-06
2:1:555441377	Hypo	2H	555441377	1	1.42347	4.14245	21.3225	3.88e-06	0.000177203	1.68488	4.31906	25.988	3.44e-07	1.53e-05	1.80964	4.47272	27.8995	1.28e-07	6.98e-06
2:1:555572919	Hypo	2H	555572919	1	1.19835	2.99594	14.0794	0.000175249	0.00303988	1.75942	3.29973	29.8514	4.66e-08	3e-06	1.75318	3.3916	22.5404	2.06e-06	6.07e-05
2:1:555691737	Hypo	2H	555691737	1	1.12753	2.89173	12.4577	0.00041628	0.00570416	1.45443	3.07405	18.6964	1.53e-05	0.000325655	1.37876	3.15721	17.2199	3.33e-05	0.000527819
2:1:556103065	Hypo	2H	556103065	1	0.986353	3.5678	14.2278	0.00016196	0.00287069	1.31358	3.76954	25.655	4.08e-07	1.77e-05	1.11924	3.78426	13.9425	0.000188488	0.00196498
2:1:556358797	Hypo	2H	556358797	1	1.46948	3.12058	24.3101	8.2e-07	5.37e-05	1.28989	3.07675	17.9113	2.31e-05	0.000451526	1.80142	3.42221	20.5394	5.84e-06	0.000134542
2:1:556387253	Hypo	2H	556387253	1	1.33762	3.5216	24.3471	8.04e-07	5.29e-05	1.83648	3.82201	55.568	9.03e-14	8.04e-11	1.84052	3.9172	29.6843	5.08e-08	3.37e-06
2:1:556544207	Hypo	2H	556544207	1	0.713378	5.39945	17.31	3.18e-05	0.000859895	0.894245	5.52499	26.0753	3.28e-07	1.48e-05	1.44228	5.98013	21.9544	2.79e-06	7.62e-05
2:1:556642028	Hypo	2H	556642028	1	1.20837	4.37254	33.2648	8.04e-09	1.5e-06	1.38283	4.49959	44.2984	2.82e-11	6.92e-09	1.52794	4.66901	38.4258	5.69e-10	1.01e-07
2:1:557320969	Hypo	2H	557320969	1	0.897978	4.14076	21.9345	2.82e-06	0.000138797	1.20177	4.33083	28.3038	1.04e-07	5.77e-06	1.46845	4.57409	42.911	5.73e-11	1.7e-08
2:2:557446868	Hypo	2H	557446868	2	0.775393	3.7129	13.8104	0.000202212	0.00337198	0.777044	3.74489	11.1377	0.000845917	0.00737141	0.879939	3.93049	10.4522	0.00122502	0.00803658
2:1:557525711	Hypo	2H	557525711	1	1.40956	2.76722	18.0253	2.18e-05	0.00064985	1.48358	2.84748	12.4176	0.00042531	0.00438571	1.54917	3.00944	12.7081	0.00036407	0.00322408
2:1:557682519	Hypo	2H	557682519	1	1.38819	2.73231	17.7165	2.56e-05	0.000734873	1.5183	2.83358	18.8211	1.44e-05	0.00030868	1.97731	3.12867	23.4354	1.29e-06	4.24e-05
2:1:557688374	Hypo	2H	557688374	1	1.32353	5.20815	51.8329	6.04e-13	1.23e-09	1.41598	5.28779	51.8072	6.12e-13	3.34e-10	1.6948	5.5383	61.5102	4.4e-15	1.11e-11
2:1:557701120	Hypo	2H	557701120	1	1.27277	4.112	33.5374	6.99e-09	1.35e-06	1.76457	4.44289	63.8871	1.32e-15	3.07e-12	1.82939	4.5474	50.4547	1.22e-12	8.13e-10
2:1:557891423	Hypo	2H	557891423	1	1.08721	2.79979	11.2222	0.000808261	0.0091835	1.59247	3.06638	23.1404	1.51e-06	5.14e-05	1.42526	3.11026	15.3435	8.96e-05	0.00111457
2:1:558541352	Hypo	2H	558541352	1	2.34876	2.86259	34.4427	4.39e-09	9.54e-07	2.30117	2.88476	30.8523	2.78e-08	1.95e-06	2.82415	3.20655	50.9715	9.37e-13	6.96e-10
2:1:558756622	Hypo	2H	558756622	1	1.10276	2.8761	12.4606	0.000415621	0.00569843	1.62153	3.14718	32.5437	1.17e-08	9.27e-07	2.05264	3.43466	31.4218	2.08e-08	1.69e-06
2:1:558766033	Hypo	2H	558766033	1	1.22459	4.9616	43.217	4.9e-11	3.3e-08	1.53155	5.17984	69.8848	6.29e-17	4.31e-13	1.3747	5.16208	41.4072	1.24e-10	3.12e-08
2:1:558861619	Hypo	2H	558861619	1	0.998789	4.22202	21.1761	4.19e-06	0.000188355	1.40575	4.48981	38.54	5.36e-10	7.57e-08	1.42562	4.5803	33.7062	6.41e-09	6.7e-07
2:1:559110134	Hypo	2H	559110134	1	1.46655	4.21381	38.194	6.4e-10	2.23e-07	1.70269	4.38321	48.3546	3.56e-12	1.32e-09	1.49432	4.33178	26.0863	3.27e-07	1.45e-05
2:1:559754377	Hypo	2H	559754377	1	1.20692	4.69307	29.1267	6.78e-08	7.97e-06	1.45437	4.87283	37.5853	8.75e-10	1.1e-07	1.50358	4.98686	31.4482	2.05e-08	1.68e-06
2:1:559885107	Hypo	2H	559885107	1	0.850403	6.66777	32.4184	1.24e-08	2.12e-06	0.869992	6.70245	25.5098	4.4e-07	1.88e-05	0.936285	6.85577	21.3544	3.82e-06	9.7e-05
2:1:559975182	Hypo	2H	559975182	1	1.35052	3.9353	26.8783	2.17e-07	1.94e-05	1.7595	4.20125	49.4973	1.99e-12	8.28e-10	1.59533	4.19169	29.3543	6.03e-08	3.83e-06
2:1:559976293	Hypo	2H	559976293	1	1.19568	4.61085	27.5235	1.55e-07	1.5e-05	1.52454	4.84477	42.0923	8.71e-11	1.71e-08	1.29659	4.78458	23.9974	9.65e-07	3.37e-05
2:1:560120874	Hypo	2H	560120874	1	1.60858	3.99973	42.8319	5.97e-11	3.76e-08	1.82351	4.15287	63.018	2.05e-15	4.12e-12	1.76495	4.19023	34.0471	5.38e-09	5.85e-07
2:1:560778514	Hypo	2H	560778514	1	1.15016	4.52055	29.529	5.51e-08	6.82e-06	1.20157	4.57679	26.5833	2.52e-07	1.2e-05	1.07285	4.60344	17.0473	3.65e-05	0.000564054
2:1:560801623	Hypo	2H	560801623	1	1.56167	2.39958	13.3302	0.000261171	0.00406853	1.96106	2.58815	27.7083	1.41e-07	7.43e-06	2.31351	2.84079	22.2441	2.4e-06	6.8e-05
2:1:561324756	Hypo	2H	561324756	1	1.73983	2.55868	23.9354	9.96e-07	6.24e-05	1.67478	2.60336	16.7982	4.16e-05	0.000716619	1.69832	2.73014	15.7861	7.09e-05	0.000938396
2:1:563948026	Hypo	2H	563948026	1	1.15043	4.11409	24.6106	7.02e-07	4.76e-05	1.22277	4.18263	24.0794	9.24e-07	3.43e-05	1.66973	4.52615	31.3364	2.17e-08	1.76e-06
2:2:563954064	Hypo	2H	563954064	2	1.10569	3.15825	13.7178	0.000212428	0.00349872	1.36319	3.31129	26.3142	2.9e-07	1.34e-05	1.74942	3.60032	31.7954	1.71e-08	1.45e-06
2:1:563957196	Hyper	2H	563957196	1	-0.589273	6.15499	16.5877	4.65e-05	0.00113217	-0.794676	6.08808	22.2447	2.4e-06	7.5e-05	-1.30281	6.25258	38.7855	4.73e-10	8.71e-08
2:1:565261871	Hypo	2H	565261871	1	1.68338	2.72981	17.3754	3.07e-05	0.000838497	2.01886	2.92325	32.5638	1.15e-08	9.2e-07	2.27653	3.11879	26.8576	2.19e-07	1.06e-05
2:1:565378599	Hypo	2H	565378599	1	1.10459	5.06585	30.1305	4.04e-08	5.25e-06	1.19329	5.14125	28.7031	8.44e-08	4.88e-06	1.10189	5.19135	20.8568	4.95e-06	0.000118588
2:1:565405316	Hypo	2H	565405316	1	1.13225	4.5725	32.9238	9.58e-09	1.72e-06	1.24173	4.65679	34.7015	3.84e-09	3.78e-07	1.00064	4.63271	16.7134	4.35e-05	0.000646406
2:1:565606311	Hypo	2H	565606311	1	1.82476	3.49871	39.1686	3.89e-10	1.51e-07	2.12813	3.69864	46.3543	9.87e-12	2.98e-09	2.11223	3.76074	37.7604	8e-10	1.31e-07
2:1:568532057	Hypo	2H	568532057	1	1.36847	2.61419	12.5716	0.000391658	0.0054585	1.47947	2.7074	16.7917	4.17e-05	0.000718336	2.19831	3.10467	30.0164	4.28e-08	2.94e-06
2:1:570082273	Hypo	2H	570082273	1	1.20338	3.00839	12.183	0.000482265	0.00635527	1.31588	3.09325	15.8508	6.85e-05	0.00105613	2.21498	3.68417	24.3705	7.95e-07	2.9e-05
2:1:570237531	Hypo	2H	570237531	1	1.22658	3.11761	15.67	7.54e-05	0.0016487	1.47869	3.27709	23.5887	1.19e-06	4.23e-05	1.53672	3.40072	20.7385	5.26e-06	0.000124417
2:1:574581458	Hypo	2H	574581458	1	1.74635	3.62007	14.3331	0.000153151	0.00275405	1.70277	3.62429	12.887	0.00033088	0.0036343	2.12407	3.92383	17.8004	2.45e-05	0.000415908
2:1:578610382	Hypo	2H	578610382	1	1.00009	4.07372	18.6874	1.54e-05	0.000499866	1.33479	4.29165	32.6655	1.09e-08	8.82e-07	0.950519	4.19394	12.7871	0.000349014	0.00312268
2:1:578694063	Hypo	2H	578694063	1	1.04509	3.72602	15.8973	6.69e-05	0.00150262	1.40882	3.94662	33.452	7.3e-09	6.36e-07	1.56792	4.14062	28.4805	9.46e-08	5.52e-06
2:1:578705125	Hypo	2H	578705125	1	1.13316	5.21317	36.0558	1.92e-09	5.01e-07	1.17194	5.25777	30.5103	3.32e-08	2.25e-06	0.928191	5.2339	13.1012	0.00029511	0.00275657
2:1:578787677	Hypo	2H	578787677	1	1.10934	3.22011	11.5694	0.000670455	0.00803972	1.43558	3.41204	23.7702	1.09e-06	3.91e-05	1.8881	3.73847	28.7686	8.16e-08	4.89e-06
2:1:579183674	Hypo	2H	579183674	1	1.51143	2.51682	14.6769	0.000127604	0.00240927	1.30438	2.50501	12.3231	0.000447395	0.00455839	2.24008	2.96232	28.6867	8.51e-08	5.06e-06
2:1:579240709	Hypo	2H	579240709	1	1.33362	3.90571	39.6364	3.06e-10	1.27e-07	1.77515	4.19517	64.0786	1.2e-15	2.91e-12	1.78192	4.26146	46.1188	1.11e-11	4.82e-09
2:1:579255303	Hypo	2H	579255303	1	0.957712	4.12268	21.1749	4.19e-06	0.000188355	1.43328	4.42848	38.233	6.28e-10	8.58e-08	1.51496	4.57121	30.4533	3.42e-08	2.49e-06
2:1:579528771	Hypo	2H	579528771	1	0.992764	3.61568	16.4855	4.9e-05	0.0011806	1.25791	3.78174	25.4328	4.58e-07	1.95e-05	1.10042	3.82166	16.1641	5.81e-05	0.000805202
2:1:579935554	Hypo	2H	579935554	1	1.0744	4.76204	37.548	8.92e-10	2.83e-07	1.43726	5.01049	63.2385	1.83e-15	3.81e-12	1.5224	5.1446	49.3026	2.19e-12	1.31e-09
2:1:580192691	Hypo	2H	580192691	1	0.612001	5.4721	15.5945	7.85e-05	0.00169742	0.583215	5.47971	12.5105	0.000404677	0.00422485	0.714878	5.68166	14.2036	0.000164058	0.00176376
2:1:580615068	Hypo	2H	580615068	1	0.998322	3.92812	13.5896	0.000227444	0.00367393	1.28438	4.11147	28.6757	8.56e-08	4.94e-06	1.37166	4.25838	23.8193	1.06e-06	3.64e-05
2:1:580990916	Hyper	2H	580990916	1	-0.913919	3.27627	13.393	0.000252562	0.00397551	-1.02499	3.31133	15.2728	9.3e-05	0.00134726	-1.18891	3.54967	15.1192	0.000100932	0.00122295
2:1:581494448	Hypo	2H	581494448	1	0.906092	4.3578	11.5238	0.000687099	0.00817182	1.3785	4.65892	30.0586	4.19e-08	2.73e-06	1.65844	4.90851	49.7777	1.72e-12	1.08e-09
2:1:581625817	Hypo	2H	581625817	1	1.38348	2.74112	17.8922	2.34e-05	0.000684217	1.50472	2.84428	17.8489	2.39e-05	0.000463316	1.71538	3.08595	12.847	0.000338019	0.00304779
2:1:581775675	Hypo	2H	581775675	1	1.78981	2.82375	23.8706	1.03e-06	6.43e-05	1.76062	2.85219	23.4151	1.31e-06	4.55e-05	2.24608	3.16443	32.1886	1.4e-08	1.24e-06
2:1:581967434	Hypo	2H	581967434	1	1.13767	2.72464	13.0461	0.000303924	0.00453744	1.22978	2.81277	13.9893	0.000183856	0.00230978	1.61798	3.12353	11.4846	0.000701739	0.00530409
2:1:582310098	Hypo	2H	582310098	1	1.10037	3.81641	16.0135	6.29e-05	0.0014337	0.987095	3.78966	11.5701	0.000670223	0.00617434	1.06514	3.95195	10.9775	0.000922253	0.00648243
2:1:582310968	Hypo	2H	582310968	1	1.5347	3.66399	27.7131	1.41e-07	1.4e-05	1.61491	3.7293	35.9647	2.01e-09	2.23e-07	1.76594	3.89808	29.4821	5.64e-08	3.65e-06
2:1:582633968	Hypo	2H	582633968	1	1.50576	3.30597	23.5964	1.19e-06	7.13e-05	1.52717	3.34113	30.1541	3.99e-08	2.61e-06	2.07651	3.7198	33.7613	6.23e-09	6.56e-07
2:1:584642067	Hypo	2H	584642067	1	1.47104	2.74677	22.4387	2.17e-06	0.000112997	1.67588	2.89677	19.765	8.76e-06	0.00021018	1.83219	3.08707	19.3474	1.09e-05	0.000219519
2:1:584761215	Hypo	2H	584761215	1	1.55026	3.20217	27.0234	2.01e-07	1.84e-05	1.34528	3.13996	18.5789	1.63e-05	0.000341629	1.67396	3.3887	26.1478	3.16e-07	1.41e-05
2:1:584825982	Hypo	2H	584825982	1	1.31432	4.58659	33.7175	6.37e-09	1.26e-06	1.56352	4.76437	55.8832	7.69e-14	7.29e-11	1.82907	4.99847	54.6818	1.42e-13	1.59e-10
2:1:585042332	Hypo	2H	585042332	1	1.33719	3.51558	19.2259	1.16e-05	0.000406186	1.50142	3.62096	30.3416	3.62e-08	2.41e-06	1.66194	3.81358	22.4393	2.17e-06	6.34e-05
2:1:585613971	Hypo	2H	585613971	1	0.986488	4.17312	16.9204	3.9e-05	0.00100069	1.21092	4.32495	28.3725	1e-07	5.61e-06	1.49919	4.58162	33.1333	8.61e-09	8.41e-07
2:1:585783407	Hypo	2H	585783407	1	0.78793	4.42889	13.8323	0.000199869	0.00334322	1.02927	4.59498	21.1151	4.33e-06	0.00012018	1.05559	4.71176	15.2126	9.61e-05	0.00117545
2:1:585832646	Hypo	2H	585832646	1	1.35655	2.59111	14.9683	0.000109333	0.00214881	1.63836	2.75193	20.1004	7.35e-06	0.000182911	2.50359	3.21821	41.1932	1.38e-10	3.39e-08
2:1:586446945	Hypo	2H	586446945	1	1.31708	4.00452	26.8472	2.2e-07	1.97e-05	1.5512	4.16698	35.0853	3.16e-09	3.24e-07	1.33966	4.14381	15.7582	7.2e-05	0.000948455
2:1:588024460	Hypo	2H	588024460	1	1.32291	3.26696	16.126	5.93e-05	0.0013688	1.43085	3.35931	22.3157	2.31e-06	7.28e-05	1.55933	3.52385	19.5769	9.66e-06	0.000199637
2:1:588360434	Hypo	2H	588360434	1	1.02692	4.76808	27.1562	1.88e-07	1.74e-05	1.15409	4.86405	33.1188	8.67e-09	7.28e-07	0.970333	4.86676	18.7292	1.51e-05	0.000284124
2:1:588599968	Hypo	2H	588599968	1	1.18054	4.67304	35.3749	2.72e-09	6.6e-07	1.30363	4.76523	41.001	1.52e-10	2.67e-08	1.24599	4.82559	28.0198	1.2e-07	6.67e-06
2:1:588607874	Hypo	2H	588607874	1	0.919851	4.83943	23.2172	1.45e-06	8.22e-05	0.959689	4.89007	19.6309	9.39e-06	0.000221897	0.824343	4.94904	10.8129	0.00100796	0.00693222
2:1:588809863	Hypo	2H	588809863	1	1.24509	3.41108	15.5359	8.1e-05	0.00173511	1.58149	3.60355	33.0765	8.86e-09	7.41e-07	2.01367	3.93724	36.1612	1.82e-09	2.54e-07
2:1:588823225	Hypo	2H	588823225	1	1.24492	4.16929	36.1146	1.86e-09	4.91e-07	1.47449	4.3307	40.4709	2e-10	3.3e-08	1.68267	4.52801	52.9268	3.46e-13	3.05e-10
2:1:588890160	Hypo	2H	588890160	1	1.41321	3.06219	17.978	2.23e-05	0.000661625	1.49182	3.13399	23.9449	9.91e-07	3.63e-05	1.61311	3.3006	19.4576	1.03e-05	0.000209428
2:1:588946440	Hypo	2H	588946440	1	1.65625	2.93124	18.6627	1.56e-05	0.000503913	1.6129	2.95011	21.7418	3.12e-06	9.25e-05	2.1796	3.31538	27.9932	1.22e-07	6.75e-06
2:1:589332061	Hypo	2H	589332061	1	1.22154	3.65814	23.7942	1.07e-06	6.63e-05	1.40864	3.78675	33.2476	8.11e-09	6.91e-07	1.68962	4.02612	31.8147	1.7e-08	1.44e-06
2:1:589450714	Hyper	2H	589450714	1	-0.81659	4.16829	15.4289	8.57e-05	0.00180756	-1.14372	4.10543	25.7427	3.9e-07	1.7e-05	-1.49951	4.34575	31.5497	1.94e-08	1.61e-06
2:1:589651067	Hypo	2H	589651067	1	0.879444	5.41456	19.9676	7.88e-06	0.000305114	1.09776	5.57171	24.1186	9.06e-07	3.37e-05	1.03016	5.63747	17.2198	3.33e-05	0.000527819
2:1:589891693	Hyper	2H	589891693	1	-0.757592	4.03514	14.2041	0.00016401	0.00289716	-0.878562	4.03817	16.2768	5.47e-05	0.00088596	-0.855632	4.31085	10.6897	0.00107734	0.00728864
2:1:589892057	Hyper	2H	589892057	1	-0.674015	4.20222	13.1426	0.000288664	0.00437267	-0.865583	4.17358	16.5523	4.73e-05	0.000791907	-0.801725	4.45992	11.3742	0.000744707	0.0055423
2:1:590012478	Hypo	2H	590012478	1	1.35793	3.10324	14.9008	0.000113312	0.00220153	1.6921	3.30861	19.7045	9.04e-06	0.000215127	1.89527	3.50622	17.006	3.73e-05	0.000573168
2:1:590147699	Hypo	2H	590147699	1	1.33049	2.82808	13.3917	0.000252738	0.00397776	1.26557	2.84463	14.0624	0.000176847	0.00224225	1.63684	3.11783	16.42	5.07e-05	0.000727071
2:1:590168728	Hypo	2H	590168728	1	1.14074	2.54221	11.197	0.000819306	0.00925951	1.5166	2.73532	15.2674	9.33e-05	0.00135026	1.55609	2.86209	15.0577	0.000104276	0.00125423
2:1:590554445	Hypo	2H	590554445	1	1.80458	2.97139	28.0363	1.19e-07	1.23e-05	1.59513	2.92195	20.5113	5.93e-06	0.000153936	2.34308	3.35837	32.6287	1.12e-08	1.04e-06
2:1:592240535	Hypo	2H	592240535	1	1.41697	4.0843	15.8955	6.69e-05	0.00150314	1.6795	4.27289	26.0831	3.27e-07	1.48e-05	1.55545	4.27783	14.9568	0.00011	0.0013048
2:1:592467499	Hypo	2H	592467499	1	1.60288	2.96488	21.7714	3.07e-06	0.000148227	1.78866	3.09221	27.6863	1.43e-07	7.5e-06	1.89727	3.23375	17.9438	2.28e-05	0.000391551
2:1:592644179	Hypo	2H	592644179	1	1.2291	4.18864	32.6141	1.12e-08	1.97e-06	1.73168	4.52304	54.6144	1.47e-13	1.14e-10	1.48698	4.44546	29.2652	6.31e-08	3.99e-06
2:1:592863809	Hypo	2H	592863809	1	1.2093	4.45151	26.9069	2.13e-07	1.92e-05	1.38766	4.5844	27.3687	1.68e-07	8.58e-06	1.2599	4.59296	19.1493	1.21e-05	0.00023904
2:1:593731758	Hypo	2H	593731758	1	1.41921	2.73889	14.2329	0.000161522	0.00286649	1.52803	2.8327	18.2319	1.96e-05	0.000394964	1.94324	3.10977	22.9062	1.7e-06	5.24e-05
2:1:593776014	Hypo	2H	593776014	1	1.40856	2.97478	20.4277	6.19e-06	0.0002532	1.8092	3.19639	30.3567	3.59e-08	2.4e-06	1.51049	3.16225	17.194	3.38e-05	0.000533324
2:1:594523025	Hyper	2H	594523025	1	-0.567109	6.34936	16.8303	4.09e-05	0.00103505	-0.859236	6.25975	26.4222	2.74e-07	1.28e-05	-1.48001	6.39877	52.3882	4.55e-13	3.78e-10
2:1:595957785	Hypo	2H	595957785	1	1.13999	4.24756	27.7428	1.39e-07	1.38e-05	1.31391	4.37135	36.0237	1.95e-09	2.17e-07	1.43626	4.53808	31.2493	2.27e-08	1.82e-06
2:1:597101110	Hypo	2H	597101110	1	1.24534	4.41694	43.7209	3.79e-11	2.67e-08	1.14882	4.37674	34.1435	5.12e-09	4.72e-07	1.24973	4.53582	30.8898	2.73e-08	2.1e-06
2:1:598772548	Hyper	2H	598772548	1	-0.615751	4.36627	11.9312	0.000552003	0.00700375	-0.703315	4.35866	13.0635	0.000301106	0.00337846	-0.743385	4.61336	10.7079	0.00106679	0.00723515
2:1:599860699	Hypo	2H	599860699	1	1.40361	3.96405	22.0594	2.64e-06	0.000131964	1.6255	4.12702	28.2521	1.07e-07	5.89e-06	1.72549	4.26303	29.5212	5.53e-08	3.6e-06
2:1:600603551	Hypo	2H	600603551	1	1.76751	3.63901	41.3768	1.26e-10	6.58e-08	1.91378	3.76942	34.8348	3.59e-09	3.59e-07	2.10445	3.96572	31.4659	2.03e-08	1.67e-06
2:1:600719628	Hypo	2H	600719628	1	0.57096	5.20489	16.9617	3.81e-05	0.000983188	0.627227	5.24885	17.5476	2.8e-05	0.000526074	0.800017	5.47323	21.743	3.12e-06	8.33e-05
2:1:600769894	Hypo	2H	600769894	1	1.28606	4.46676	31.9643	1.57e-08	2.51e-06	1.46293	4.59532	42.4213	7.36e-11	1.52e-08	1.38527	4.63717	25.6763	4.04e-07	1.71e-05
2:1:600826949	Hypo	2H	600826949	1	1.26169	2.68973	12.0213	0.000525971	0.00675772	1.52954	2.8427	20.0693	7.47e-06	0.000185163	1.65478	3.01795	14.3925	0.00014839	0.00163521
2:1:601096250	Hypo	2H	601096250	1	1.3792	2.56738	13.0952	0.000296061	0.00445412	1.67029	2.74421	28.0275	1.2e-07	6.47e-06	2.00653	2.95998	21.5669	3.42e-06	8.91e-05
2:1:601501554	Hypo	2H	601501554	1	0.805446	5.82029	27.1656	1.87e-07	1.73e-05	0.770513	5.82226	20.9631	4.68e-06	0.000127933	0.752016	5.93663	14.7447	0.000123094	0.00142251
2:1:601717948	Hypo	2H	601717948	1	1.63791	3.89293	34.5618	4.13e-09	9.12e-07	1.69003	3.94604	42.7196	6.32e-11	1.35e-08	1.70442	4.04035	26.1709	3.13e-07	1.4e-05
2:1:601735092	Hypo	2H	601735092	1	1.34971	3.03308	16.024	6.25e-05	0.00142685	1.47848	3.13464	19.443	1.04e-05	0.000239687	1.34562	3.20487	11.421	0.000726197	0.00544605
2:1:601871112	Hypo	2H	601871112	1	1.51947	3.11086	21.8973	2.88e-06	0.000140647	2.02022	3.39425	51.1041	8.76e-13	4.32e-10	1.9307	3.44248	29.4833	5.64e-08	3.65e-06
2:1:601913797	Hypo	2H	601913797	1	1.38749	3.63416	31.0798	2.48e-08	3.56e-06	1.44803	3.69474	27.0979	1.93e-07	9.61e-06	1.23482	3.68916	16.7374	4.29e-05	0.000640106
2:1:602003438	Hypo	2H	602003438	1	0.872735	4.73874	24.1808	8.77e-07	5.66e-05	1.123	4.90701	37.5506	8.91e-10	1.12e-07	1.00014	4.94643	23.371	1.34e-06	4.35e-05
2:1:602248177	Hypo	2H	602248177	1	1.39613	2.99214	19.0862	1.25e-05	0.000427481	1.60419	3.12386	27.5819	1.51e-07	7.82e-06	2.12803	3.49052	25.4677	4.5e-07	1.86e-05
2:1:602467974	Hypo	2H	602467974	1	0.653643	5.14877	15.8654	6.8e-05	0.00152182	0.620948	5.15054	13.2642	0.000270527	0.00311419	0.713215	5.33123	12.9386	0.000321883	0.00294212
2:1:602847435	Hypo	2H	602847435	1	1.30128	3.93327	33.9537	5.64e-09	1.14e-06	1.57163	4.11628	39.9773	2.57e-10	4.05e-08	1.67519	4.25218	35.0834	3.16e-09	3.88e-07
2:1:602896013	Hypo	2H	602896013	1	1.37144	2.78735	15.6425	7.65e-05	0.00166664	1.70378	2.97409	28.0007	1.21e-07	6.55e-06	1.95044	3.18218	29.072	6.97e-08	4.31e-06
2:1:603677383	Hypo	2H	603677383	1	1.34285	2.60355	13.9619	0.000186553	0.00317626	1.32634	2.65147	12.6615	0.000373267	0.00398353	1.75975	2.94527	11.93	0.000552361	0.00441927
2:1:603691730	Hypo	2H	603691730	1	0.851211	4.16627	15.8779	6.76e-05	0.00151348	0.925806	4.23237	18.2509	1.94e-05	0.000391868	0.926275	4.35464	13.916	0.000191161	0.00198656
2:1:603726402	Hypo	2H	603726402	1	1.23799	3.9839	24.7131	6.65e-07	4.57e-05	1.6759	4.2714	51.5332	7.04e-13	3.6e-10	1.76192	4.38542	42.1296	8.54e-11	2.34e-08
2:1:603741065	Hypo	2H	603741065	1	1.15516	4.36476	31.6427	1.85e-08	2.84e-06	1.4206	4.55419	40.8931	1.61e-10	2.8e-08	1.60439	4.74178	44.3292	2.78e-11	9.48e-09
2:1:605446915	Hypo	2H	605446915	1	1.32141	2.77803	17.2229	3.32e-05	0.000888174	1.76475	3.01016	30.8742	2.75e-08	1.94e-06	1.8821	3.16042	32.4433	1.23e-08	1.12e-06
2:1:605595962	Hypo	2H	605595962	1	1.39352	3.96474	28.7847	8.09e-08	9.2e-06	1.46526	4.03219	37.0418	1.16e-09	1.39e-07	1.41936	4.09581	26.2686	2.97e-07	1.34e-05
2:1:605674574	Hypo	2H	605674574	1	0.737188	3.6075	13.7818	0.000205319	0.00340757	0.891509	3.71652	16.8694	4e-05	0.000696305	0.854336	3.83508	10.9219	0.000950341	0.0066378
2:1:605691719	Hyper	2H	605691719	1	-1.46774	5.6284	42.7407	6.25e-11	3.88e-08	-0.93304	5.78879	12.8563	0.000336353	0.00367675	-2.03797	5.89594	56.9273	4.52e-14	6.87e-11
2:1:606182606	Hypo	2H	606182606	1	1.67342	2.66527	19.2452	1.15e-05	0.000403276	2.02923	2.85143	23.2249	1.44e-06	4.95e-05	2.37769	3.09149	28.7936	8.05e-08	4.84e-06
2:1:606189004	Hypo	2H	606189004	1	0.687957	4.66611	12.7023	0.000365205	0.00519255	1.09487	4.92658	29.3919	5.91e-08	3.64e-06	1.19268	5.08261	29.2096	6.5e-08	4.06e-06
2:1:606979160	Hypo	2H	606979160	1	1.34581	4.25722	33.9194	5.74e-09	1.15e-06	1.27435	4.23759	27.3268	1.72e-07	8.73e-06	1.19385	4.29363	18.2925	1.89e-05	0.000338667
2:1:607000179	Hypo	2H	607000179	1	0.953473	5.60942	35.2028	2.97e-09	7.1e-07	1.10208	5.72474	41.1543	1.41e-10	2.52e-08	1.11152	5.82454	29.1108	6.84e-08	4.24e-06
2:1:607728365	Hyper	2H	607728365	1	-1.38672	4.23401	31.2582	2.26e-08	3.33e-06	-1.09631	4.34925	16.9875	3.76e-05	0.000663514	-1.57332	4.55977	28.7654	8.17e-08	4.89e-06
2:1:608645326	Hypo	2H	608645326	1	1.33921	3.43096	23.1272	1.52e-06	8.5e-05	1.56381	3.58482	30.5653	3.23e-08	2.2e-06	1.42826	3.63623	14.8488	0.000116481	0.00136454
2:1:608718422	Hypo	2H	608718422	1	1.32769	3.11626	18.9828	1.32e-05	0.000447042	1.71939	3.33899	35.9338	2.04e-09	2.25e-07	2.14603	3.68541	31.0538	2.51e-08	1.97e-06
2:1:608881460	Hypo	2H	608881460	1	0.784627	5.11022	23.2974	1.39e-06	7.99e-05	0.789551	5.13204	18.5721	1.64e-05	0.000342473	0.661873	5.19831	10.9233	0.000949635	0.00663427
2:1:609162815	Hypo	2H	609162815	1	1.17826	4.0926	22.9709	1.64e-06	9.08e-05	1.50416	4.31446	37.6876	8.3e-10	1.06e-07	1.55843	4.41841	39.0287	4.18e-10	7.97e-08
2:1:609298887	Hypo	2H	609298887	1	1.15258	5.71962	41.8566	9.82e-11	5.41e-08	1.16769	5.75382	35.192	2.99e-09	3.09e-07	1.09834	5.8017	25.3736	4.72e-07	1.93e-05
2:1:610013503	Hypo	2H	610013503	1	0.927599	6.24439	29.9613	4.41e-08	5.65e-06	0.866742	6.22803	31.3042	2.21e-08	1.6e-06	0.658398	6.23405	12.0567	0.000516059	0.00419588
2:1:610521888	Hypo	2H	610521888	1	1.13553	3.41973	15.9471	6.51e-05	0.00147019	1.41068	3.59466	31.3863	2.11e-08	1.54e-06	1.77283	3.86323	31.8174	1.69e-08	1.44e-06
2:1:612120669	Hypo	2H	612120669	1	1.43002	2.80707	12.777	0.000350908	0.00504487	1.61777	2.90673	21.9972	2.73e-06	8.3e-05	1.90032	3.14777	20.2003	6.97e-06	0.000154362
2:1:612638895	Hypo	2H	612638895	1	1.65663	3.08652	28.6601	8.63e-08	9.61e-06	1.63459	3.12291	20.4173	6.23e-06	0.000159659	1.88707	3.35103	23.4141	1.31e-06	4.28e-05
2:1:612776171	Hypo	2H	612776171	1	1.03104	3.83732	17.3916	3.04e-05	0.000833471	1.2291	3.97336	27.1187	1.91e-07	9.53e-06	1.35119	4.13981	19.8182	8.52e-06	0.000180299
2:1:612834917	Hypo	2H	612834917	1	0.939171	4.65298	22.6438	1.95e-06	0.000103827	1.08121	4.7506	33.202	8.31e-09	7.02e-07	0.903951	4.78009	16.3258	5.33e-05	0.000753304
2:1:612889613	Hypo	2H	612889613	1	1.86328	3.49637	51.5914	6.83e-13	1.29e-09	2.3463	3.81005	75.4348	3.78e-18	5.51e-14	2.20304	3.78128	41.0958	1.45e-10	3.51e-08
2:1:612954507	Hypo	2H	612954507	1	0.601646	4.93584	11.2507	0.000795933	0.00908244	0.943234	5.16076	17.5169	2.85e-05	0.000532828	0.884433	5.24013	13.9217	0.000190586	0.00198225
2:1:613169058	Hypo	2H	613169058	1	1.30316	3.95809	21.3565	3.81e-06	0.000174691	1.41102	4.03493	24.3595	7.99e-07	3.04e-05	1.44816	4.14718	20.3782	6.36e-06	0.000143555
2:1:613465074	Hypo	2H	613465074	1	1.39111	4.73364	33.5501	6.95e-09	1.34e-06	1.50823	4.8297	40.4636	2e-10	3.3e-08	1.5709	4.9356	34.9076	3.46e-09	4.17e-07
2:1:613640368	Hyper	2H	613640368	1	-0.688524	4.24701	12.3376	0.000443925	0.00597724	-0.882207	4.22398	17.6292	2.68e-05	0.000509007	-0.951471	4.48558	15.4661	8.4e-05	0.00106155
2:1:613676853	Hypo	2H	613676853	1	1.17051	2.66776	13.1221	0.000291829	0.00440604	1.32594	2.77745	14.5326	0.000137756	0.00184318	1.6721	3.03086	19.2255	1.16e-05	0.000231021
2:1:613681957	Hyper	2H	613681957	1	-0.822399	4.0942	13.5946	0.00022684	0.0036676	-0.775909	4.13534	12.6366	0.000378272	0.00402374	-1.05367	4.3545	16.1949	5.71e-05	0.00079484
2:1:613688459	Hypo	2H	613688459	1	0.633012	5.50631	14.2667	0.000158645	0.00282811	0.678098	5.55098	16.2643	5.51e-05	0.000890773	0.640217	5.66775	10.6156	0.00112135	0.00751019
2:2:613699285	Hypo	2H	613699285	2	1.20692	3.46603	20.8132	5.06e-06	0.000218341	1.53478	3.66727	35.4881	2.57e-09	2.7e-07	1.74283	3.86014	33.8983	5.81e-09	6.19e-07
2:1:614041117	Hypo	2H	614041117	1	1.02716	4.37504	22.3481	2.27e-06	0.000117177	1.26316	4.53474	38.6625	5.04e-10	7.2e-08	0.834361	4.41464	12.5674	0.000392539	0.00341131
2:1:614051695	Hypo	2H	614051695	1	1.17597	3.82101	24.4379	7.67e-07	5.09e-05	1.47653	4.01503	37.2042	1.06e-09	1.3e-07	1.41618	4.07496	31.2976	2.21e-08	1.78e-06
2:1:615493336	Hypo	2H	615493336	1	2.40343	3.07906	33.703	6.42e-09	1.26e-06	2.62842	3.2139	34.6079	4.03e-09	3.94e-07	2.90612	3.4365	46.0217	1.17e-11	4.98e-09
2:1:615609777	Hypo	2H	615609777	1	1.41496	3.55969	30.1986	3.9e-08	5.09e-06	1.70846	3.74346	48.8566	2.75e-12	1.08e-09	1.94891	3.97306	40.9176	1.59e-10	3.76e-08
2:1:615773473	Hypo	2H	615773473	1	0.849667	4.69366	14.2164	0.000162947	0.00288277	0.885085	4.7394	16.3771	5.19e-05	0.000850659	1.38833	5.13124	22.8254	1.77e-06	5.43e-05
2:1:616070271	Hypo	2H	616070271	1	0.96041	4.31173	21.0454	4.49e-06	0.000198524	0.8163	4.25641	11.7464	0.000609597	0.00574913	0.88641	4.41897	10.8922	0.000965691	0.00671649
2:1:616149953	Hypo	2H	616149953	1	1.37443	3.88484	30.5963	3.18e-08	4.34e-06	1.64516	4.06653	48.4825	3.33e-12	1.26e-09	1.72217	4.18399	35.1579	3.04e-09	3.77e-07
2:1:616265385	Hypo	2H	616265385	1	1.60301	3.83339	32.8141	1.01e-08	1.8e-06	1.70076	3.91933	34.7802	3.69e-09	3.67e-07	2.01275	4.16154	45.7986	1.31e-11	5.46e-09
2:1:616278629	Hypo	2H	616278629	1	1.47031	2.88009	18.7016	1.53e-05	0.000496849	1.8271	3.08378	34.4042	4.48e-09	4.25e-07	2.08368	3.29121	37.6938	8.28e-10	1.34e-07
2:1:616388666	Hypo	2H	616388666	1	1.12913	3.96928	21.8169	3e-06	0.000145236	1.58101	4.2583	48.6384	3.08e-12	1.18e-09	1.6525	4.38766	34.5215	4.22e-09	4.87e-07
2:1:616578511	Hypo	2H	616578511	1	0.844973	5.30602	24.3151	8.18e-07	5.37e-05	0.811812	5.31193	17.8819	2.35e-05	0.000457041	0.974463	5.51861	22.4904	2.11e-06	6.2e-05
2:1:617241143	Hypo	2H	617241143	1	1.49696	4.39862	39.2816	3.67e-10	1.44e-07	1.57658	4.46914	45.9415	1.22e-11	3.51e-09	1.60857	4.55583	34.7209	3.81e-09	4.48e-07
2:1:618371170	Hypo	2H	618371170	1	0.645891	5.11826	15.6829	7.49e-05	0.00164045	0.842277	5.25278	25.6778	4.03e-07	1.75e-05	0.857053	5.38445	19.6706	9.2e-06	0.000192376
2:1:618859030	Hypo	2H	618859030	1	0.973666	4.01491	17.0614	3.62e-05	0.0009466	1.1798	4.16154	19.8546	8.36e-06	0.000202534	1.50886	4.4392	27.6732	1.44e-07	7.6e-06
2:1:619004979	Hypo	2H	619004979	1	0.947721	3.63742	15.6485	7.63e-05	0.00166262	1.52018	3.97739	39.9405	2.62e-10	4.11e-08	1.57684	4.09464	35.038	3.23e-09	3.96e-07
2:1:619012599	Hypo	2H	619012599	1	0.886959	5.41026	27.5521	1.53e-07	1.49e-05	0.983108	5.49255	30.6705	3.06e-08	2.1e-06	0.87277	5.54222	17.3687	3.08e-05	0.000496886
2:1:619032122	Hypo	2H	619032122	1	1.56998	3.54865	29.4651	5.69e-08	6.97e-06	1.99785	3.82458	57.9114	2.74e-14	3.27e-11	2.172	3.9908	41.0022	1.52e-10	3.63e-08
2:1:619049147	Hypo	2H	619049147	1	1.49292	4.10868	51.6885	6.5e-13	1.27e-09	1.83519	4.34593	69.0038	9.83e-17	5.15e-13	1.88875	4.44194	54.6343	1.45e-13	1.6e-10
2:1:619145410	Hypo	2H	619145410	1	1.01552	3.4245	13.9425	0.000188486	0.00320208	1.23525	3.56234	23.147	1.5e-06	5.13e-05	1.41246	3.76254	20.5125	5.92e-06	0.000135911
2:1:619582907	Hypo	2H	619582907	1	1.43427	4.18531	40.5674	1.9e-10	8.83e-08	1.70727	4.37761	66.7041	3.15e-16	9.95e-13	1.6014	4.38535	36.2177	1.76e-09	2.49e-07
2:1:620927255	Hyper	2H	620927255	1	-0.564759	4.81104	13.3025	0.000265054	0.00411135	-0.714882	4.77697	18.7571	1.48e-05	0.000317011	-0.855215	5.01885	18.3203	1.87e-05	0.000334973
2:1:620978027	Hypo	2H	620978027	1	1.05013	3.86803	19.8476	8.39e-06	0.000320363	1.31796	4.03905	27.4021	1.65e-07	8.47e-06	1.45055	4.20552	30.342	3.62e-08	2.59e-06
2:1:621156248	Hypo	2H	621156248	1	0.994455	4.50738	11.7616	0.000604641	0.00748029	1.22516	4.67581	22.565	2.03e-06	6.54e-05	1.2499	4.78395	24.7946	6.38e-07	2.44e-05
2:1:621509207	Hypo	2H	621509207	1	1.79759	3.3026	39.7754	2.85e-10	1.2e-07	1.79384	3.3302	36.662	1.4e-09	1.66e-07	1.58931	3.33543	17.8065	2.45e-05	0.000414712
2:1:623021954	Hypo	2H	623021954	1	1.34356	2.55116	12.7732	0.000351624	0.00505316	1.82051	2.79673	20.062	7.5e-06	0.000185629	2.25766	3.06635	34.588	4.07e-09	4.75e-07
2:1:623086829	Hypo	2H	623086829	1	1.50109	2.78307	19.7469	8.84e-06	0.000332775	1.46072	2.81646	16.2269	5.62e-05	0.000904072	2.10292	3.19987	23.2466	1.42e-06	4.59e-05
2:1:623294398	Hyper	2H	623294398	1	-0.882657	3.13347	11.8271	0.000583757	0.00729622	-1.02558	3.16543	15.245	9.44e-05	0.00136454	-1.13353	3.407	12.4678	0.000414033	0.00355213
2:1:623734808	Hypo	2H	623734808	1	1.32491	3.17322	12.3685	0.000436628	0.00590888	1.63015	3.35032	19.0286	1.29e-05	0.000283313	1.93945	3.59612	25.2041	5.16e-07	2.06e-05
2:1:623943210	Hypo	2H	623943210	1	1.25195	4.64212	32.1324	1.44e-08	2.35e-06	1.46531	4.79899	41.8581	9.81e-11	1.88e-08	1.49426	4.88188	34.2888	4.75e-09	5.37e-07
2:1:624021369	Hypo	2H	624021369	1	1.46603	3.39554	25.6511	4.09e-07	3.17e-05	1.43458	3.40859	27.0895	1.94e-07	9.64e-06	1.35635	3.47378	15.7415	7.26e-05	0.000954695
2:1:625398393	Hypo	2H	625398393	1	1.15403	3.693	24.7068	6.67e-07	4.58e-05	1.68757	4.01762	44.1662	3.02e-11	7.38e-09	1.58378	4.03278	27.5868	1.5e-07	7.85e-06
2:1:625531224	Hypo	2H	625531224	1	0.901838	3.91017	19.3342	1.1e-05	0.00038916	0.889671	3.9269	17.0395	3.66e-05	0.000649885	0.897232	4.06197	12.7607	0.00035397	0.00315673
2:1:625587173	Hypo	2H	625587173	1	1.49596	2.99422	28.4023	9.85e-08	1.06e-05	1.57259	3.08016	23.6438	1.16e-06	4.13e-05	1.64431	3.23533	17.2326	3.31e-05	0.000524949
3:1:3339670	Hypo	3H	3339670	1	0.883846	3.82855	13.9915	0.000183641	0.00314376	1.05472	3.94538	19.1592	1.2e-05	0.000269187	1.19977	4.12804	15.3027	9.16e-05	0.0011335
3:1:3610736	Hyper	3H	3610736	1	-0.703031	6.77981	19.6228	9.43e-06	0.000348711	-0.952894	6.71796	26.7185	2.35e-07	1.13e-05	-1.4072	6.89559	39.9621	2.59e-10	5.48e-08
3:1:4159020	Hypo	3H	4159020	1	1.08763	4.57164	20.9163	4.8e-06	0.000209402	1.26444	4.69707	26.3083	2.91e-07	1.34e-05	1.01289	4.66825	11.5059	0.000693752	0.00526024
3:1:5501183	Hypo	3H	5501183	1	1.23431	5.1706	55.8101	7.98e-14	2.59e-10	1.61781	5.44403	81.1563	2.09e-19	4.87e-15	1.48695	5.41663	41.4055	1.24e-10	3.12e-08
3:1:6195581	Hypo	3H	6195581	1	0.862439	6.0804	23.8295	1.05e-06	6.53e-05	1.10408	6.25577	33.9199	5.74e-09	5.18e-07	0.900524	6.24673	17.5724	2.77e-05	0.00045693
3:1:6204932	Hypo	3H	6204932	1	1.2427	2.87882	15.8503	6.86e-05	0.00152998	1.31532	2.95936	16.0372	6.21e-05	0.000976554	1.56504	3.19881	14.6985	0.00012615	0.00144951
3:1:6438195	Hypo	3H	6438195	1	0.819503	8.83964	32.8437	9.99e-09	1.78e-06	0.946824	8.94558	32.4746	1.21e-08	9.56e-07	0.819205	8.9822	15.2625	9.36e-05	0.00115196
3:1:6463342	Hypo	3H	6463342	1	1.15504	3.7467	16.7261	4.32e-05	0.00107764	1.32942	3.86992	24.1834	8.76e-07	3.28e-05	1.28848	3.94537	18.4592	1.74e-05	0.000316801
3:1:6552329	Hypo	3H	6552329	1	1.28474	3.05009	16.5314	4.79e-05	0.00115985	1.53606	3.20973	29.1655	6.65e-08	3.99e-06	2.16422	3.60566	56.4916	5.64e-14	8.07e-11
3:1:6561564	Hypo	3H	6561564	1	1.29339	4.15123	28.551	9.13e-08	1e-05	1.69494	4.42067	58.2279	2.33e-14	2.9e-11	1.59705	4.42549	33.1181	8.67e-09	8.44e-07
3:1:7601405	Hypo	3H	7601405	1	1.48198	4.3153	41.8169	1e-10	5.48e-08	1.74396	4.49478	70.531	4.53e-17	3.52e-13	1.65707	4.51746	43.2119	4.91e-11	1.51e-08
3:2:7733158	Hypo	3H	7733158	2	1.43183	2.77241	16.9084	3.92e-05	0.00100573	1.57684	2.88464	18.5352	1.67e-05	0.000346995	1.83589	3.10948	13.7648	0.000207187	0.00210978
3:1:7775168	Hypo	3H	7775168	1	1.75336	2.89983	27.2807	1.76e-07	1.66e-05	1.76091	2.94071	30.8688	2.76e-08	1.94e-06	2.04336	3.16585	30.8959	2.72e-08	2.1e-06
3:1:8091379	Hypo	3H	8091379	1	1.04809	3.38685	13.2285	0.000275726	0.00422887	1.78136	3.81222	42.3476	7.64e-11	1.56e-08	1.7395	3.87572	29.905	4.54e-08	3.07e-06
3:1:8232002	Hypo	3H	8232002	1	0.932194	4.4408	22.5774	2.02e-06	0.000107023	1.18445	4.60782	37.7739	7.94e-10	1.03e-07	0.923572	4.57854	15.7219	7.34e-05	0.000962493
3:1:8258995	Hypo	3H	8258995	1	1.60709	3.18866	33.3801	7.58e-09	1.42e-06	1.56	3.19975	24.6017	7.05e-07	2.76e-05	1.2417	3.18615	10.1476	0.00144486	0.00912525
3:1:8303282	Hypo	3H	8303282	1	1.54474	5.4277	78.5919	7.64e-19	3.78e-14	1.71375	5.56361	68.904	1.03e-16	5.15e-13	1.50504	5.4849	46.6203	8.62e-12	3.96e-09
3:1:8314334	Hypo	3H	8314334	1	1.13765	3.88961	23.5553	1.21e-06	7.25e-05	1.48298	4.1151	38.4455	5.63e-10	7.87e-08	1.34111	4.12496	24.0879	9.2e-07	3.25e-05
3:1:8357369	Hyper	3H	8357369	1	-1.08476	3.07772	14.3041	0.000155527	0.00278292	-1.22374	3.11467	15.1123	0.000101298	0.00144223	-1.48602	3.3469	16.2392	5.58e-05	0.000781014
3:1:8807226	Hypo	3H	8807226	1	1.93188	2.54484	11.2464	0.00079777	0.00909992	2.9147	3.02931	30.4742	3.38e-08	2.28e-06	3.06852	3.13771	45.1917	1.79e-11	6.86e-09
3:1:8931149	Hyper	3H	8931149	1	-1.1941	4.6585	21.4088	3.71e-06	0.000171174	-0.963048	4.75175	14.4942	0.000140592	0.00187104	-1.42255	4.94973	23.7419	1.1e-06	3.75e-05
3:1:8970974	Hypo	3H	8970974	1	1.19258	4.44105	28.5001	9.37e-08	1.02e-05	1.32105	4.53952	35.2007	2.97e-09	3.08e-07	1.25401	4.59403	25.2365	5.07e-07	2.04e-05
3:1:8986324	Hypo	3H	8986324	1	1.28057	2.59816	12.7848	0.000349452	0.00502923	1.18326	2.60987	12.635	0.000378584	0.00402559	1.65648	2.93919	12.7832	0.000349744	0.00312764
3:1:9069858	Hypo	3H	9069858	1	1.23649	9.42984	42.5294	6.96e-11	4.17e-08	1.39383	9.57218	46.4417	9.44e-12	2.87e-09	1.11468	9.46034	20.3453	6.47e-06	0.000145663
3:1:9076790	Hyper	3H	9076790	1	-1.32835	2.5684	15.1922	9.71e-05	0.00197594	-1.17964	2.67181	11.7339	0.000613731	0.0057787	-1.8602	2.86503	17.688	2.6e-05	0.000435018
3:1:10514539	Hyper	3H	10514539	1	-0.617825	5.65368	16.71	4.35e-05	0.00108499	-0.728439	5.62294	18.0466	2.16e-05	0.000425958	-1.08261	5.81375	21.1931	4.15e-06	0.000103433
3:1:10614772	Hypo	3H	10614772	1	1.00561	5.88684	35.5797	2.45e-09	6.05e-07	1.13685	5.99115	38.5642	5.3e-10	7.5e-08	1.05658	6.03467	28.4902	9.42e-08	5.51e-06
3:1:12409017	Hyper	3H	12409017	1	-0.968304	3.89224	18.8366	1.42e-05	0.000472817	-1.12008	3.90136	20.8882	4.87e-06	0.000131799	-1.95455	4.05952	37.7244	8.15e-10	1.33e-07
3:1:12532654	Hypo	3H	12532654	1	1.00765	3.63329	12.3552	0.000439749	0.00594232	1.32812	3.83237	25.1812	5.22e-07	2.16e-05	1.50474	4.02433	24.0213	9.53e-07	3.34e-05
3:1:13262056	Hypo	3H	13262056	1	0.715165	4.98524	20.2907	6.65e-06	0.000267762	0.713617	5.00246	14.737	0.000123597	0.00169077	0.926412	5.24266	20.4224	6.21e-06	0.000140954
3:1:13362931	Hypo	3H	13362931	1	1.21486	4.45115	40.8019	1.68e-10	8.14e-08	1.46157	4.62267	50.9308	9.57e-13	4.52e-10	1.38376	4.66034	32.1867	1.4e-08	1.24e-06
3:1:13408711	Hypo	3H	13408711	1	1.12489	3.10626	11.0697	0.000877522	0.00972002	1.54859	3.34398	24.158	8.87e-07	3.31e-05	1.75016	3.54175	23.6386	1.16e-06	3.91e-05
3:1:13435487	Hypo	3H	13435487	1	0.805542	4.91317	17.3592	3.09e-05	0.000842676	1.10498	5.11478	33.1781	8.41e-09	7.09e-07	0.970879	5.15324	19.0537	1.27e-05	0.000248384
3:1:14517857	Hypo	3H	14517857	1	1.12285	3.58125	12.1745	0.000484464	0.00637086	1.3266	3.71195	20.4693	6.06e-06	0.000156548	1.36378	3.83452	17.7482	2.52e-05	0.000424189
3:1:14648622	Hyper	3H	14648622	1	-1.38335	3.17369	19.4518	1.03e-05	0.000372755	-1.37788	3.23957	18.1994	1.99e-05	0.000400024	-1.40579	3.51225	12.388	0.00043209	0.00367227
3:1:14657682	Hyper	3H	14657682	1	-0.963492	4.50163	18.1213	2.07e-05	0.000626914	-1.1423	4.47544	22.01	2.71e-06	8.26e-05	-1.98185	4.64998	43.7425	3.75e-11	1.23e-08
3:1:17159000	Hypo	3H	17159000	1	0.787177	5.21494	25.9227	3.55e-07	2.85e-05	0.861809	5.27861	28.6391	8.72e-08	5.02e-06	0.678554	5.30966	12.7085	0.000363989	0.00322394
3:1:17243778	Hypo	3H	17243778	1	1.28841	2.4957	11.3881	0.000739143	0.0086068	1.28025	2.54621	14.0009	0.000182721	0.0022979	1.37929	2.72426	10.4473	0.0012283	0.00805331
3:1:17272263	Hypo	3H	17272263	1	0.763099	5.0644	16.0844	6.06e-05	0.00139273	1.01279	5.23587	27.8176	1.33e-07	7.09e-06	0.957282	5.31385	16.6611	4.47e-05	0.000660873
3:1:18090491	Hypo	3H	18090491	1	1.20448	2.68584	14.884	0.000114326	0.00221694	1.80146	2.98296	35.8	2.19e-09	2.38e-07	1.77762	3.07661	22.4237	2.19e-06	6.37e-05
3:1:18343689	Hypo	3H	18343689	1	1.31043	3.11536	18.1354	2.06e-05	0.000623295	1.61667	3.30218	26.8956	2.15e-07	1.05e-05	1.95826	3.60064	21.0797	4.41e-06	0.00010849
3:1:18390041	Hypo	3H	18390041	1	1.49455	2.95845	23.6748	1.14e-06	6.93e-05	1.88494	3.17888	33.7612	6.23e-09	5.54e-07	1.63848	3.1699	20.5377	5.85e-06	0.000134597
3:1:18431709	Hypo	3H	18431709	1	1.00963	4.17643	24.3442	8.06e-07	5.3e-05	1.37565	4.41191	42.6449	6.56e-11	1.39e-08	0.903157	4.27483	10.5238	0.00117846	0.00779125
3:1:19126571	Hypo	3H	19126571	1	1.14031	4.4784	30.3815	3.55e-08	4.73e-06	1.46503	4.70471	43.6994	3.83e-11	8.91e-09	1.17404	4.61859	20.4917	5.99e-06	0.000137064
3:1:19262595	Hypo	3H	19262595	1	1.61786	3.39312	33.8316	6.01e-09	1.2e-06	1.94558	3.60219	52.013	5.51e-13	3.06e-10	2.12029	3.77758	41.6576	1.09e-10	2.81e-08
3:1:19389029	Hypo	3H	19389029	1	0.980215	5.79462	42.3708	7.55e-11	4.41e-08	0.896401	5.75402	25.7273	3.93e-07	1.71e-05	0.834931	5.83848	18.109	2.09e-05	0.000366237
3:1:19447609	Hypo	3H	19447609	1	0.880276	3.75212	14.838	0.000117152	0.00225552	0.984238	3.83767	17.5429	2.81e-05	0.000527042	0.923052	3.93608	11.4195	0.000726787	0.00544836
3:1:19452047	Hypo	3H	19452047	1	1.12343	2.6518	11.0436	0.000889925	0.0098154	1.67943	2.92161	28.2929	1.04e-07	5.79e-06	1.54636	2.98703	11.3446	0.00075668	0.00560268
3:1:19670888	Hypo	3H	19670888	1	1.32485	2.84126	16.6367	4.53e-05	0.00111399	1.44939	2.93767	18.9431	1.35e-05	0.000293912	1.66276	3.13779	18.1032	2.09e-05	0.000367043
3:1:20337641	Hypo	3H	20337641	1	1.35097	5.80585	54.2002	1.81e-13	4.49e-10	1.24496	5.75356	42.7929	6.09e-11	1.31e-08	0.986358	5.69198	20.2631	6.75e-06	0.000150456
3:1:20370601	Hyper	3H	20370601	1	-0.77146	3.71991	11.366	0.000747992	0.00867506	-0.931416	3.72061	16.7708	4.22e-05	0.000724984	-1.63503	3.88436	30.643	3.1e-08	2.31e-06
3:1:20588988	Hypo	3H	20588988	1	1.55025	3.31749	25.3196	4.86e-07	3.61e-05	1.68239	3.41378	31.6868	1.81e-08	1.36e-06	1.55088	3.45925	17.1669	3.42e-05	0.000539065
3:1:21084564	Hypo	3H	21084564	1	1.25459	2.67494	15.5933	7.85e-05	0.00169761	1.82079	2.96498	34.609	4.03e-09	3.94e-07	2.37233	3.33448	29.246	6.37e-08	4.01e-06
3:1:21091132	Hypo	3H	21091132	1	1.14518	4.90659	47.6584	5.07e-12	6.29e-09	1.29443	5.02046	57.2626	3.81e-14	4.24e-11	1.21508	5.06289	34.7435	3.76e-09	4.45e-07
3:1:21295096	Hypo	3H	21295096	1	0.961877	3.78253	17.7539	2.51e-05	0.000724766	1.00489	3.83155	17.0822	3.58e-05	0.000638323	1.05324	3.97598	13.8388	0.000199178	0.00205086
3:1:21344960	Hyper	3H	21344960	1	-0.657596	4.61462	15.3338	9.01e-05	0.00187621	-0.598824	4.65746	10.8545	0.00098555	0.00828133	-0.776991	4.87344	12.7112	0.000363479	0.00322
3:1:21567512	Hyper	3H	21567512	1	-1.15241	4.75301	36.1925	1.79e-09	4.8e-07	-1.27906	4.7385	34.3749	4.55e-09	4.31e-07	-1.25831	5.0645	25.6673	4.06e-07	1.71e-05
3:1:26316792	Hypo	3H	26316792	1	1.48598	3.95318	35.2864	2.85e-09	6.85e-07	1.64248	4.0638	49.615	1.87e-12	8.01e-10	1.68557	4.16761	38.3841	5.81e-10	1.02e-07
3:1:26861445	Hypo	3H	26861445	1	1.26133	3.50749	23.586	1.19e-06	7.16e-05	1.28804	3.55112	24.7935	6.38e-07	2.55e-05	1.96972	4.00196	27.2617	1.78e-07	8.96e-06
3:1:27384894	Hypo	3H	27384894	1	1.16224	3.56756	22.4939	2.11e-06	0.000110476	1.54512	3.80465	37.8836	7.51e-10	9.85e-08	1.55855	3.89876	30.4023	3.51e-08	2.54e-06
3:1:27459819	Hypo	3H	27459819	1	1.31041	3.79148	28.5413	9.17e-08	1.01e-05	1.54786	3.95217	40.2005	2.29e-10	3.7e-08	1.80724	4.19491	37.471	9.28e-10	1.48e-07
3:1:27482646	Hypo	3H	27482646	1	1.27149	3.11009	15.1202	0.000100879	0.00203025	1.25751	3.13947	15.4508	8.47e-05	0.00124948	1.39157	3.33388	13.4641	0.000243175	0.00238096
3:1:27521141	Hypo	3H	27521141	1	1.19288	3.37199	20.3327	6.51e-06	0.000263132	1.65241	3.64898	37.2953	1.02e-09	1.25e-07	1.54694	3.68871	24.016	9.55e-07	3.35e-05
3:1:27548929	Hypo	3H	27548929	1	0.900277	4.81673	21.8394	2.96e-06	0.000143887	0.930872	4.85883	26.954	2.08e-07	1.02e-05	0.956555	4.9845	18.0706	2.13e-05	0.0003717
3:1:27720378	Hypo	3H	27720378	1	1.34311	2.65641	17.5554	2.79e-05	0.000782881	1.4262	2.75564	13.6191	0.000223901	0.00269097	1.31472	2.84931	11.4188	0.000727063	0.00545002
3:1:28762449	Hypo	3H	28762449	1	1.20755	3.74114	19.3922	1.06e-05	0.00038081	1.48886	3.92374	29.2093	6.5e-08	3.92e-06	1.64225	4.08949	26.7592	2.3e-07	1.1e-05
3:1:29021900	Hypo	3H	29021900	1	1.49007	4.2151	40.7974	1.69e-10	8.14e-08	1.80667	4.43882	61.9762	3.48e-15	6.05e-12	1.6336	4.38963	29.5011	5.59e-08	3.62e-06
3:1:29030690	Hypo	3H	29030690	1	0.968409	4.82251	27.2175	1.82e-07	1.69e-05	1.23637	5.00653	40.5555	1.91e-10	3.18e-08	1.42688	5.21023	38.9506	4.35e-10	8.17e-08
3:2:29047375	Hypo	3H	29047375	2	1.58561	2.95175	20.2986	6.62e-06	0.000266843	1.63213	3.00484	22.2165	2.44e-06	7.59e-05	2.108	3.33006	24.1093	9.1e-07	3.23e-05
3:1:29121744	Hypo	3H	29121744	1	1.38261	2.32893	11.9288	0.000552737	0.00701082	1.70709	2.49563	18.9697	1.33e-05	0.000290595	2.06844	2.75011	15.1503	9.93e-05	0.00120699
3:1:29258810	Hypo	3H	29258810	1	1.19284	3.46469	16.0502	6.17e-05	0.00141105	1.63544	3.72688	40.6887	1.79e-10	3.02e-08	1.70292	3.86627	23.4937	1.25e-06	4.15e-05
3:1:29439437	Hypo	3H	29439437	1	1.11042	4.96823	23.4686	1.27e-06	7.45e-05	1.26674	5.09078	29.7424	4.93e-08	3.13e-06	0.862126	4.96737	10.7191	0.00106034	0.0072008
3:1:29479723	Hyper	3H	29479723	1	-1.20535	3.89766	26.2911	2.94e-07	2.45e-05	-0.833668	4.02977	13.1564	0.000286538	0.00325419	-1.57993	4.17408	32.547	1.16e-08	1.07e-06
3:1:29987320	Hyper	3H	29987320	1	-0.805148	4.583	23.1956	1.46e-06	8.28e-05	-0.589657	4.6785	10.9574	0.000932295	0.00793907	-0.912142	4.85581	16.8599	4.02e-05	0.000609019
3:1:33387952	Hypo	3H	33387952	1	1.42701	4.91894	49.6027	1.88e-12	2.73e-09	1.54723	5.01591	56.994	4.37e-14	4.64e-11	1.53562	5.08218	43.6004	4.03e-11	1.3e-08
3:1:33805776	Hypo	3H	33805776	1	1.4102	2.64336	16.9505	3.84e-05	0.000988367	1.6061	2.76238	21.9694	2.77e-06	8.41e-05	2.11438	3.09128	23.4173	1.3e-06	4.28e-05
3:1:34320974	Hypo	3H	34320974	1	1.16202	4.63834	22.2996	2.33e-06	0.00011975	1.38944	4.80335	33.2923	7.93e-09	6.77e-07	1.57418	4.99736	26.4658	2.68e-07	1.23e-05
3:1:34320997	Hypo	3H	34320997	1	1.35335	3.08188	16.5792	4.67e-05	0.00113631	1.47065	3.16579	27.2727	1.77e-07	8.93e-06	1.72198	3.39892	20.2491	6.8e-06	0.000151251
3:1:35651077	Hypo	3H	35651077	1	0.58943	4.79062	12.5231	0.000401943	0.00556019	0.765704	4.90998	15.5825	7.9e-05	0.00117859	0.690387	5.00439	10.0465	0.00152638	0.00951198
3:1:35990979	Hypo	3H	35990979	1	0.708372	6.63775	13.7514	0.000208667	0.00344775	0.871202	6.76166	19.676	9.17e-06	0.000217711	1.00279	6.95563	15.5571	8.01e-05	0.00102399
3:1:36024564	Hypo	3H	36024564	1	1.19602	2.92077	13.2708	0.000269568	0.00416501	1.24482	2.99088	12.0282	0.000524022	0.00513143	1.6132	3.27108	15.2957	9.19e-05	0.00113631
3:1:36062012	Hypo	3H	36062012	1	0.810783	4.38673	16.4682	4.95e-05	0.00118901	1.07293	4.55645	23.5331	1.23e-06	4.33e-05	1.02704	4.65182	13.0753	0.00029921	0.00278565
3:2:36274422	Hypo	3H	36274422	2	0.839027	5.46947	25.6299	4.14e-07	3.2e-05	1.08646	5.64361	37.682	8.33e-10	1.06e-07	0.958723	5.67296	22.0013	2.72e-06	7.49e-05
3:1:36414509	Hypo	3H	36414509	1	0.960843	4.6801	15.8601	6.82e-05	0.00152406	0.795476	4.60984	11.5804	0.000666494	0.00615019	1.38999	5.04997	24.5378	7.29e-07	2.71e-05
3:1:37432933	Hyper	3H	37432933	1	-0.67065	5.24084	21.7944	3.03e-06	0.000146764	-0.736277	5.2405	23.4622	1.27e-06	4.46e-05	-0.998684	5.44086	32.0619	1.49e-08	1.29e-06
3:1:37545380	Hypo	3H	37545380	1	0.587918	5.89688	13.3367	0.000260257	0.004058	0.775047	6.02542	20.7238	5.31e-06	0.00014122	0.742836	6.1449	12.1101	0.000501484	0.00410715
3:1:37607775	Hypo	3H	37607775	1	1.02627	3.51103	13.6938	0.000215168	0.00353262	1.21889	3.64247	19.8932	8.19e-06	0.000199216	1.19455	3.75578	11.4038	0.00073293	0.00548442
3:1:41575391	Hypo	3H	41575391	1	1.47149	4.92633	43.4706	4.3e-11	2.94e-08	1.63655	5.0518	60.0646	9.18e-15	1.39e-11	1.41211	4.98552	30.3069	3.69e-08	2.62e-06
3:1:41841704	Hypo	3H	41841704	1	1.77494	3.06519	27.3917	1.66e-07	1.59e-05	1.6728	3.04633	23.9074	1.01e-06	3.68e-05	2.00685	3.3218	24.7154	6.64e-07	2.51e-05
3:1:42428968	Hypo	3H	42428968	1	1.58018	2.77709	18.888	1.39e-05	0.000464132	1.68101	2.86917	21.0432	4.49e-06	0.000123888	1.42054	2.89321	11.4743	0.000705635	0.00532701
3:1:42772157	Hypo	3H	42772157	1	1.17677	4.44632	30.0284	4.26e-08	5.49e-06	1.34001	4.57446	31.2982	2.21e-08	1.6e-06	1.45987	4.73357	27.3793	1.67e-07	8.54e-06
3:1:44630917	Hypo	3H	44630917	1	1.36318	4.32572	34.2418	4.87e-09	1.03e-06	1.28431	4.30054	35.5051	2.54e-09	2.69e-07	1.15241	4.32676	16.8667	4.01e-05	0.000607204
3:1:44648558	Hypo	3H	44648558	1	1.08694	3.63514	22.9556	1.66e-06	9.13e-05	1.26457	3.75589	29.3686	5.98e-08	3.67e-06	1.34394	3.90246	20.9729	4.66e-06	0.000113092
3:1:44652155	Hypo	3H	44652155	1	1.39446	3.13798	12.5467	0.000396907	0.00551449	1.38449	3.17388	15.0969	0.00010213	0.00145194	1.26684	3.23624	11.0376	0.00089282	0.00633078
3:1:45514188	Hypo	3H	45514188	1	0.706095	5.95614	25.8121	3.76e-07	2.98e-05	0.758085	6.00567	19.7673	8.75e-06	0.00020998	0.935672	6.22974	27.074	1.96e-07	9.66e-06
3:1:45546402	Hyper	3H	45546402	1	-1.39141	4.43019	42.9916	5.5e-11	3.56e-08	-0.787917	4.62796	14.6952	0.000126367	0.00172039	-1.24729	4.81417	25.2944	4.92e-07	1.99e-05
3:1:45563103	Hypo	3H	45563103	1	0.757676	4.67141	24.5617	7.2e-07	4.85e-05	0.894686	4.76384	26.4629	2.69e-07	1.26e-05	0.83327	4.85964	16.7186	4.34e-05	0.000645004
3:1:46012346	Hypo	3H	46012346	1	0.850323	3.50792	11.8778	0.000568072	0.0071535	1.19688	3.70627	26.6643	2.42e-07	1.15e-05	1.08174	3.76907	16.3431	5.28e-05	0.000749014
3:1:46044041	Hypo	3H	46044041	1	1.1873	4.4921	33.9179	5.75e-09	1.15e-06	1.40328	4.6457	45.1368	1.84e-11	4.88e-09	1.30245	4.6754	28.3104	1.03e-07	5.93e-06
3:1:46120827	Hypo	3H	46120827	1	1.47376	3.15975	21.6564	3.26e-06	0.000155252	1.21256	3.07446	14.3069	0.000155295	0.00202353	1.67906	3.40117	21.6953	3.2e-06	8.49e-05
3:1:46202367	Hypo	3H	46202367	1	0.870597	4.95126	22.2399	2.41e-06	0.000122749	0.944301	5.01528	27.3405	1.71e-07	8.67e-06	0.895434	5.10604	20.9925	4.61e-06	0.000112218
3:1:46370141	Hypo	3H	46370141	1	1.38125	5.50737	58.8055	1.74e-14	8.64e-11	1.3192	5.47816	46.9031	7.46e-12	2.36e-09	1.20983	5.49893	28.5862	8.96e-08	5.28e-06
3:1:46457705	Hypo	3H	46457705	1	1.89301	2.48782	25.166	5.26e-07	3.83e-05	2.40669	2.73566	37.7881	7.89e-10	1.03e-07	3.07105	3.11612	46.8114	7.82e-12	3.62e-09
3:1:46513380	Hyper	3H	46513380	1	-0.824654	3.68857	12.6398	0.000377615	0.00532386	-0.874939	3.71688	12.9057	0.000327584	0.00360623	-1.89123	3.83722	33.6028	6.76e-09	7.03e-07
3:1:46741420	Hypo	3H	46741420	1	1.19807	2.76695	13.5594	0.000231132	0.00372033	1.2517	2.83159	13.8606	0.00019688	0.00243872	1.72135	3.1339	16.3063	5.39e-05	0.000759356
3:1:47121801	Hypo	3H	47121801	1	0.899544	4.56127	23.2842	1.4e-06	8.02e-05	1.10989	4.70554	34.0192	5.46e-09	4.98e-07	1.15212	4.83017	30.1446	4.01e-08	2.79e-06
3:1:47183878	Hypo	3H	47183878	1	1.0073	5.90011	28.345	1.02e-07	1.08e-05	1.13413	6.00256	42.3359	7.69e-11	1.56e-08	1.05144	6.05075	22.7923	1.8e-06	5.5e-05
3:1:47505594	Hyper	3H	47505594	1	-0.839121	6.76769	39.4229	3.41e-10	1.38e-07	-0.918119	6.75009	31.8115	1.7e-08	1.28e-06	-1.30688	6.95803	45.4499	1.57e-11	6.23e-09
3:1:47886494	Hypo	3H	47886494	1	1.00151	3.79054	19.2929	1.12e-05	0.00039567	1.40335	4.04008	32.2907	1.33e-08	1.04e-06	1.64959	4.26496	39.6409	3.05e-10	6.23e-08
3:1:47937523	Hypo	3H	47937523	1	1.11713	3.85129	18.2054	1.98e-05	0.000606211	1.58701	4.14266	60.5068	7.33e-15	1.19e-11	1.55331	4.21173	27.6278	1.47e-07	7.72e-06
3:1:48025256	Hypo	3H	48025256	1	1.60674	2.61966	14.0456	0.000178435	0.00307898	1.46121	2.62078	17.71	2.57e-05	0.000491189	1.99759	2.93835	18.6373	1.58e-05	0.000294855
3:1:48025423	Hypo	3H	48025423	1	1.40656	5.27178	50.7294	1.06e-12	1.78e-09	1.27421	5.20133	37.1032	1.12e-09	1.35e-07	1.24664	5.26957	28.3865	9.94e-08	5.75e-06
3:1:48030509	Hypo	3H	48030509	1	1.90891	2.51217	22.6527	1.94e-06	0.000103441	1.6375	2.47849	16.6641	4.46e-05	0.000755682	2.23286	2.8071	20.5797	5.72e-06	0.00013245
3:1:48188257	Hypo	3H	48188257	1	1.02413	3.31196	11.5104	0.000692084	0.00821387	1.04872	3.36312	11.5174	0.000689495	0.00630772	1.6596	3.76713	20.1659	7.1e-06	0.000156774
3:1:48220142	Hypo	3H	48220142	1	1.09486	4.35375	24.2451	8.48e-07	5.52e-05	1.31415	4.50637	34.7807	3.69e-09	3.67e-07	1.48441	4.69046	35.3927	2.69e-09	3.42e-07
3:1:48259497	Hypo	3H	48259497	1	1.839	3.07219	34.8292	3.6e-09	8.27e-07	1.84751	3.10928	29.827	4.72e-08	3.03e-06	2.0883	3.32213	26.5651	2.55e-07	1.19e-05
3:1:48326203	Hypo	3H	48326203	1	0.515402	5.91037	15.5273	8.13e-05	0.00174087	0.561378	5.95032	13.7309	0.000210952	0.00257226	0.765725	6.19942	21.4694	3.6e-06	9.28e-05
3:1:48725849	Hypo	3H	48725849	1	2.15807	2.4349	27.3555	1.69e-07	1.61e-05	1.7778	2.37321	18.662	1.56e-05	0.000330511	2.97049	2.91951	39.671	3.01e-10	6.14e-08
3:1:48951596	Hypo	3H	48951596	1	1.1938	3.40044	20.6452	5.53e-06	0.000233787	1.28011	3.47494	18.554	1.65e-05	0.000344828	1.55894	3.70809	24.2891	8.29e-07	3e-05
3:1:49123633	Hypo	3H	49123633	1	0.905465	5.11266	34.1562	5.09e-09	1.06e-06	1.20425	5.31369	51.5485	6.98e-13	3.59e-10	1.2073	5.41109	44.4022	2.67e-11	9.23e-09
3:1:49945314	Hypo	3H	49945314	1	1.48517	2.29572	12.7062	0.000364453	0.00518619	1.67778	2.41709	17.8953	2.33e-05	0.000454354	2.52132	2.83353	25.6807	4.03e-07	1.71e-05
3:1:50105612	Hyper	3H	50105612	1	-0.449017	7.42818	13.7924	0.000204157	0.00339397	-0.562124	7.3832	21.0848	4.39e-06	0.000121717	-0.809557	7.58396	21.4448	3.64e-06	9.36e-05
3:1:50130334	Hypo	3H	50130334	1	0.863694	4.58663	14.6284	0.000130925	0.00245602	0.878089	4.61835	14.4765	0.00014192	0.00188463	0.895779	4.75141	12.0572	0.000515939	0.00419526
3:1:50768660	Hyper	3H	50768660	1	-0.689365	8.82609	40.9121	1.59e-10	7.86e-08	-0.647299	8.85031	31.539	1.95e-08	1.44e-06	-0.920009	9.048	29.3689	5.98e-08	3.81e-06
3:1:50770687	Hyper	3H	50770687	1	-0.640443	7.15641	37.6178	8.61e-10	2.77e-07	-0.521552	7.22024	18.6214	1.59e-05	0.000335906	-0.818481	7.38612	29.1986	6.53e-08	4.08e-06
3:1:50848874	Hypo	3H	50848874	1	0.778961	3.84697	11.9691	0.000540896	0.00690254	1.02133	4.00489	21.968	2.77e-06	8.41e-05	0.969232	4.09387	13.7122	0.000213066	0.00215808
3:1:51159472	Hypo	3H	51159472	1	1.47635	3.46098	24.9724	5.82e-07	4.13e-05	1.69711	3.61014	32.9922	9.25e-09	7.68e-07	1.70007	3.68614	23.4518	1.28e-06	4.22e-05
3:1:51632695	Hypo	3H	51632695	1	1.08391	2.84416	11.016	0.000903279	0.009914	1.58274	3.10058	26.0055	3.4e-07	1.52e-05	1.42475	3.15462	14.6535	0.000129192	0.00147776
3:1:51987717	Hypo	3H	51987717	1	1.04757	5.73274	42.5745	6.8e-11	4.13e-08	1.09506	5.78472	39.0272	4.18e-10	6.15e-08	1.23289	5.96056	34.2302	4.9e-09	5.49e-07
3:1:52011697	Hypo	3H	52011697	1	0.790581	4.0044	11.4285	0.000723266	0.00847973	0.961921	4.12079	17.837	2.41e-05	0.000465857	1.42201	4.47539	33.58	6.84e-09	7.07e-07
3:1:52585150	Hypo	3H	52585150	1	1.04425	3.14506	15.9514	6.5e-05	0.00146826	1.22829	3.26591	22.6814	1.91e-06	6.23e-05	0.988449	3.30024	12.1552	0.000489511	0.00402848
3:1:53063690	Hypo	3H	53063690	1	1.21942	4.74108	45.619	1.44e-11	1.28e-08	1.27961	4.79472	41.9969	9.14e-11	1.78e-08	1.35429	4.92616	40.6591	1.81e-10	4.22e-08
3:1:53091712	Hypo	3H	53091712	1	1.30955	4.31867	34.7174	3.81e-09	8.64e-07	1.68188	4.57542	52.1312	5.19e-13	2.93e-10	1.91579	4.77965	62.2745	2.99e-15	9.22e-12
3:1:53274555	Hypo	3H	53274555	1	1.25139	5.09019	42.9938	5.49e-11	3.56e-08	1.64259	5.37504	65.1984	6.77e-16	1.8e-12	1.63204	5.42436	48.2801	3.69e-12	2.01e-09
3:1:53588678	Hyper	3H	53588678	1	-0.626735	4.87911	13.8807	0.000194791	0.0032804	-0.59388	4.91531	11.2871	0.000780467	0.00693103	-0.724281	5.13315	11.539	0.000681508	0.00519132
3:1:53786989	Hyper	3H	53786989	1	-0.363564	5.78547	11.1178	0.000855031	0.00954638	-0.610435	5.69674	21.9622	2.78e-06	8.43e-05	-0.642681	5.95035	15.7842	7.1e-05	0.000938897
3:1:54843424	Hyper	3H	54843424	1	-1.56123	2.82428	19.8105	8.55e-06	0.000324243	-1.351	2.92736	13.9342	0.000189322	0.00236318	-1.84822	3.15008	18.7825	1.47e-05	0.000278036
3:1:54920875	Hyper	3H	54920875	1	-0.915273	4.46638	25.222	5.11e-07	3.75e-05	-0.97766	4.48678	22.4541	2.15e-06	6.85e-05	-1.68338	4.63586	42.8429	5.93e-11	1.75e-08
3:1:55974765	Hyper	3H	55974765	1	-1.05127	3.16086	17.43	2.98e-05	0.000820511	-0.982188	3.22624	15.1373	0.0001	0.00142803	-1.08226	3.47122	12.8648	0.000334826	0.00302869
3:1:56011386	Hypo	3H	56011386	1	0.938701	7.41613	28.1305	1.13e-07	1.19e-05	1.22981	7.63689	42.1183	8.59e-11	1.7e-08	1.1662	7.68157	25.131	5.36e-07	2.13e-05
3:1:56011396	Hypo	3H	56011396	1	1.13893	3.37811	14.8219	0.000118158	0.0022687	1.25902	3.45818	23.2692	1.41e-06	4.85e-05	1.29677	3.62001	13.4944	0.000239277	0.00235306
3:1:56011411	Hypo	3H	56011411	1	1.78282	2.87835	26.29	2.94e-07	2.45e-05	1.64451	2.8603	22.9436	1.67e-06	5.58e-05	1.80896	3.05389	17.9558	2.26e-05	0.000389633
3:1:56011436	Hypo	3H	56011436	1	1.20086	5.65574	45.0871	1.88e-11	1.6e-08	1.36759	5.7813	66.2911	3.89e-16	1.16e-12	2.07067	6.34978	44.0588	3.19e-11	1.08e-08
3:1:65799990	Hypo	3H	65799990	1	1.07198	3.79715	18.4682	1.73e-05	0.000545914	1.78716	4.24136	56.2326	6.44e-14	6.36e-11	1.78837	4.30421	53.238	2.95e-13	2.7e-10
3:1:67262162	Hypo	3H	67262162	1	1.02334	4.95748	29.4805	5.65e-08	6.94e-06	1.22614	5.10753	37.6012	8.68e-10	1.1e-07	1.59167	5.41041	50.713	1.07e-12	7.54e-10
3:1:67316514	Hyper	3H	67316514	1	-1.1571	4.59211	25.1833	5.21e-07	3.81e-05	-1.00628	4.65484	15.8843	6.73e-05	0.0010409	-1.29273	4.89896	20.6344	5.56e-06	0.000129634
3:1:72490695	Hypo	3H	72490695	1	0.668375	5.61796	19.3177	1.11e-05	0.000391367	0.710966	5.66163	17.1804	3.4e-05	0.00061294	0.707468	5.78972	13.9064	0.000192146	0.00199511
3:1:73978546	Hypo	3H	73978546	1	0.942567	5.05447	27.4311	1.63e-07	1.56e-05	1.1172	5.18009	31.6029	1.89e-08	1.41e-06	1.47309	5.48481	50.6841	1.08e-12	7.6e-10
3:1:75622925	Hypo	3H	75622925	1	1.09694	3.27265	17.0781	3.59e-05	0.000941021	1.41095	3.46542	31.3538	2.15e-08	1.56e-06	1.29257	3.51136	19.1604	1.2e-05	0.000237937
3:1:82508792	Hypo	3H	82508792	1	0.821696	3.42046	11.3605	0.000750245	0.00869526	0.95707	3.52192	15.7039	7.41e-05	0.00112106	1.00335	3.67332	10.2646	0.00135605	0.0086996
3:1:82550667	Hypo	3H	82550667	1	0.707879	4.33365	11.6414	0.000645005	0.00783155	0.733466	4.37016	12.1945	0.000479304	0.00479909	0.952713	4.60559	15.4588	8.43e-05	0.0010649
3:1:88444252	Hypo	3H	88444252	1	1.17921	4.26403	32.4092	1.25e-08	2.13e-06	1.41121	4.42331	43.7814	3.67e-11	8.64e-09	1.76712	4.72658	48.0684	4.12e-12	2.21e-09
3:1:88464012	Hypo	3H	88464012	1	0.742191	4.21757	11.0664	0.000879068	0.00972989	1.13625	4.46214	24.9637	5.84e-07	2.36e-05	1.16665	4.58119	20.6718	5.45e-06	0.000127665
3:1:88805091	Hypo	3H	88805091	1	0.641883	5.30414	15.4403	8.52e-05	0.0018007	0.918368	5.48797	22.6522	1.94e-06	6.31e-05	0.842932	5.56555	16.7359	4.3e-05	0.000640449
3:1:89676548	Hypo	3H	89676548	1	1.00979	4.76632	36.1136	1.86e-09	4.91e-07	1.02224	4.77972	23.9955	9.66e-07	3.55e-05	0.794131	4.77552	11.4245	0.000724812	0.00543729
3:1:89995232	Hypo	3H	89995232	1	1.68989	2.90994	25.7888	3.81e-07	3.01e-05	1.54099	2.88945	19.6233	9.43e-06	0.000222595	1.85093	3.13502	20.8905	4.86e-06	0.000116877
3:1:90019479	Hyper	3H	90019479	1	-0.963957	2.96989	11.156	0.000837606	0.00940386	-1.18783	2.98564	14.4781	0.000141799	0.00188388	-1.6556	3.20969	17.1422	3.47e-05	0.000544052
3:2:90344554	Hyper	3H	90344554	2	-1.1477	4.90297	32.5359	1.17e-08	2.03e-06	-1.12061	4.95767	24.9069	6.02e-07	2.42e-05	-1.58588	5.15406	43.1876	4.97e-11	1.52e-08
3:1:90404157	Hypo	3H	90404157	1	0.804939	7.62364	31.859	1.66e-08	2.61e-06	1.00127	7.77475	34.2285	4.9e-09	4.56e-07	0.890983	7.81538	19.9984	7.75e-06	0.000167603
3:1:90480776	Hypo	3H	90480776	1	0.993508	4.69979	18.0716	2.13e-05	0.000639656	1.10377	4.791	22.0161	2.7e-06	8.23e-05	1.09243	4.88608	13.4103	0.000250243	0.00243254
3:1:90524175	Hypo	3H	90524175	1	0.677154	4.40604	13.3663	0.000256182	0.0040134	0.818387	4.51351	13.8654	0.000196376	0.00243351	0.861976	4.66905	12.7636	0.000353431	0.00315363
3:1:90524200	Hypo	3H	90524200	1	0.957213	3.6368	14.0412	0.000178846	0.00308365	1.19591	3.79339	22.3717	2.25e-06	7.11e-05	1.28768	3.94246	17.9854	2.23e-05	0.000384777
3:1:90676174	Hyper	3H	90676174	1	-0.666786	5.40265	29.8164	4.75e-08	6.02e-06	-0.486795	5.49995	15.722	7.34e-05	0.00111297	-0.572437	5.71677	12.2386	0.000468113	0.00389459
3:1:99582156	Hypo	3H	99582156	1	1.19831	2.95307	13.5173	0.000236376	0.00378325	1.36047	3.06556	17.5834	2.75e-05	0.000518596	1.55973	3.26786	14.9757	0.000108906	0.00129649
3:1:99593602	Hypo	3H	99593602	1	1.2512	3.60461	19.461	1.03e-05	0.000371346	1.53554	3.78534	36.855	1.27e-09	1.51e-07	1.84741	4.03938	37.6966	8.26e-10	1.34e-07
3:1:99650025	Hypo	3H	99650025	1	0.683788	5.24029	20.2844	6.67e-06	0.000268469	0.75726	5.29979	26.1723	3.12e-07	1.42e-05	0.645669	5.37376	13.562	0.000230816	0.00229312
3:1:99862721	Hypo	3H	99862721	1	1.1538	5.66926	39.5537	3.19e-10	1.32e-07	1.23824	5.7463	35.2542	2.89e-09	3.01e-07	1.10413	5.7573	25.2747	4.97e-07	2.01e-05
3:1:99919260	Hypo	3H	99919260	1	1.03025	5.00207	27.0962	1.94e-07	1.78e-05	1.32304	5.2089	43.4358	4.38e-11	1e-08	1.14212	5.18398	25.1848	5.21e-07	2.08e-05
3:1:100547053	Hypo	3H	100547053	1	1.30916	3.29656	23.6702	1.14e-06	6.93e-05	1.70224	3.53281	39.112	4e-10	5.92e-08	1.38014	3.47505	18.5582	1.65e-05	0.000304571
3:1:100658739	Hypo	3H	100658739	1	1.50991	2.62354	14.3276	0.000153593	0.0027595	1.83622	2.80375	26.4595	2.69e-07	1.26e-05	2.14429	3.03548	28.1671	1.11e-07	6.27e-06
3:1:104860513	Hypo	3H	104860513	1	1.05436	3.72889	18.6579	1.56e-05	0.000504907	1.17942	3.82226	22.7501	1.84e-06	6.06e-05	1.45317	4.07131	25.762	3.86e-07	1.66e-05
3:1:112981903	Hypo	3H	112981903	1	1.13143	3.91276	29.2734	6.29e-08	7.51e-06	1.34208	4.05807	34.7909	3.67e-09	3.65e-07	1.6537	4.33386	30.2744	3.75e-08	2.65e-06
3:1:114731966	Hypo	3H	114731966	1	1.06831	3.13288	11.9043	0.000560035	0.00707966	1.17291	3.22097	14.7982	0.000119647	0.00164639	1.17834	3.34806	10.4174	0.00124831	0.0081563
3:1:117102792	Hypo	3H	117102792	1	0.84551	4.55378	18.3542	1.83e-05	0.000572712	1.21593	4.79646	43.2722	4.76e-11	1.07e-08	1.12854	4.84666	27.0185	2.02e-07	9.92e-06
3:1:117151474	Hypo	3H	117151474	1	1.4364	3.05025	26.8305	2.22e-07	1.98e-05	1.71343	3.22763	29.1528	6.69e-08	4.01e-06	1.91253	3.4182	29.5206	5.53e-08	3.6e-06
3:1:117829650	Hyper	3H	117829650	1	-1.54441	2.53307	16.7778	4.2e-05	0.00105754	-1.29276	2.6458	11.3282	0.000763391	0.00681363	-2.04115	2.82991	17.5063	2.86e-05	0.000469577
3:1:122774846	Hyper	3H	122774846	1	-0.759654	4.73394	20.4654	6.07e-06	0.000249859	-0.738484	4.76574	15.843	6.88e-05	0.00105977	-1.05225	4.95696	23.0158	1.61e-06	5.03e-05
3:1:127658196	Hyper	3H	127658196	1	-0.5324	8.09827	15.6897	7.46e-05	0.00163637	-0.641686	8.05281	17.7403	2.53e-05	0.000484917	-0.901183	8.26533	21.9011	2.87e-06	7.79e-05
3:1:129002005	Hypo	3H	129002005	1	1.23882	3.37048	20.8265	5.03e-06	0.000217307	1.37661	3.46692	26.7256	2.34e-07	1.12e-05	1.73081	3.74338	35.0483	3.22e-09	3.94e-07
3:1:129393370	Hypo	3H	129393370	1	0.933575	5.18277	36.9441	1.22e-09	3.57e-07	0.980575	5.22682	31.395	2.11e-08	1.53e-06	1.36991	5.55704	55.3705	9.98e-14	1.23e-10
3:1:129413230	Hypo	3H	129413230	1	0.912803	3.95739	14.8567	0.000115994	0.00224126	1.15323	4.11184	27.254	1.78e-07	9e-06	1.23409	4.26489	18.4406	1.75e-05	0.00031931
3:1:129763073	Hypo	3H	129763073	1	1.62709	2.8035	25.522	4.37e-07	3.35e-05	1.41541	2.76346	18.2458	1.94e-05	0.000392684	1.2278	2.83971	9.98331	0.00157965	0.00976908
3:1:129832352	Hypo	3H	129832352	1	0.989505	3.48109	14.7626	0.000121933	0.0023232	1.45788	3.75684	29.4804	5.65e-08	3.5e-06	1.56026	3.90127	33.3141	7.84e-09	7.8e-07
3:1:130247111	Hyper	3H	130247111	1	-0.769246	3.83872	15.0544	0.000104459	0.00208191	-0.861862	3.85395	14.9754	0.000108922	0.00152874	-1.09727	4.07725	16.6647	4.46e-05	0.000660185
3:1:130930195	Hyper	3H	130930195	1	-0.924016	3.61192	18.8682	1.4e-05	0.000467264	-0.8099	3.67934	14.3419	0.000152432	0.00199448	-1.22496	3.87905	17.795	2.46e-05	0.000416875
3:1:135100701	Hypo	3H	135100701	1	1.21914	4.41678	33.6637	6.55e-09	1.28e-06	1.4747	4.59234	54.7504	1.37e-13	1.08e-10	1.5126	4.69699	37.8784	7.53e-10	1.25e-07
3:1:137917623	Hypo	3H	137917623	1	0.978637	5.67118	40.3749	2.1e-10	9.67e-08	1.04957	5.73686	42.4154	7.38e-11	1.52e-08	0.705159	5.65707	14.0054	0.000182291	0.00191555
3:1:140104935	Hypo	3H	140104935	1	1.49703	3.1188	19.2271	1.16e-05	0.000406157	1.75863	3.27694	36.1655	1.81e-09	2.04e-07	1.71499	3.35199	21.934	2.82e-06	7.69e-05
3:1:140165972	Hyper	3H	140165972	1	-1.28775	2.8051	19.223	1.16e-05	0.000406436	-0.969045	2.92508	11.528	0.000685567	0.00628196	-1.81805	3.08795	22.4165	2.19e-06	6.39e-05
3:1:140300604	Hypo	3H	140300604	1	0.943899	4.16877	17.6044	2.72e-05	0.000767974	1.38811	4.45727	37.282	1.02e-09	1.26e-07	1.3549	4.53457	23.1906	1.47e-06	4.69e-05
3:1:140450702	Hypo	3H	140450702	1	0.904759	3.98761	13.5643	0.000230531	0.00371367	1.28956	4.23145	31.3906	2.11e-08	1.54e-06	1.33138	4.3468	27.5851	1.5e-07	7.85e-06
3:1:141075438	Hyper	3H	141075438	1	-1.25731	3.28446	21.0975	4.36e-06	0.000194426	-1.56849	3.2916	28.5064	9.34e-08	5.3e-06	-1.63699	3.57741	21.901	2.87e-06	7.79e-05
3:1:141096862	Hypo	3H	141096862	1	1.93969	2.67569	12.9481	0.000320239	0.0047148	2.20555	2.81452	17.0143	3.71e-05	0.00065604	3.03236	3.29756	41.675	1.08e-10	2.81e-08
3:1:141096912	Hypo	3H	141096912	1	0.86781	4.43939	22.5594	2.04e-06	0.000107667	1.07134	4.57374	25.2196	5.12e-07	2.13e-05	0.827504	4.56318	11.5848	0.000664945	0.00509305
3:1:141114042	Hypo	3H	141114042	1	0.96253	3.3164	12.3032	0.000452173	0.00606342	1.07949	3.41093	13.0174	0.000308605	0.00344214	1.22864	3.60131	13.8461	0.000198409	0.00204565
3:1:141451741	Hypo	3H	141451741	1	0.817131	5.44966	20.6852	5.41e-06	0.00023011	1.07077	5.62968	31.5578	1.94e-08	1.43e-06	0.822557	5.60469	13.3988	0.000251785	0.00244176
3:1:141574933	Hypo	3H	141574933	1	1.00082	4.31852	15.1788	9.78e-05	0.001986	0.928591	4.30371	16.131	5.91e-05	0.000940508	1.79628	4.92757	29.1858	6.58e-08	4.1e-06
3:1:141803459	Hypo	3H	141803459	1	1.38537	3.04414	18.6651	1.56e-05	0.00050342	1.28509	3.03538	18.6943	1.53e-05	0.000325958	1.74346	3.35652	21.782	3.05e-06	8.19e-05
3:1:141907023	Hypo	3H	141907023	1	1.34529	3.83798	32.2988	1.32e-08	2.21e-06	1.74899	4.10303	52.0961	5.29e-13	2.95e-10	1.82131	4.21552	35.6545	2.36e-09	3.07e-07
3:1:142368322	Hypo	3H	142368322	1	1.4112	4.54199	42.124	8.57e-11	4.83e-08	1.58923	4.67521	55.2979	1.04e-13	8.86e-11	1.28136	4.57357	21.8613	2.93e-06	7.92e-05
3:1:142693942	Hypo	3H	142693942	1	1.08929	3.06559	19.736	8.89e-06	0.000334047	1.26178	3.17492	20.6046	5.65e-06	0.000148067	1.4332	3.35951	24.4842	7.49e-07	2.77e-05
3:1:143307153	Hypo	3H	143307153	1	1.00321	4.31696	19.551	9.79e-06	0.000358166	1.10426	4.39557	31.2487	2.27e-08	1.64e-06	1.35973	4.63872	33.8154	6.06e-09	6.41e-07
3:1:143506177	Hypo	3H	143506177	1	0.777443	5.39776	18.143	2.05e-05	0.000621455	0.969154	5.53545	27.3779	1.67e-07	8.55e-06	1.42859	5.9144	39.8188	2.79e-10	5.82e-08
3:1:143550129	Hypo	3H	143550129	1	1.04284	3.85405	19.5315	9.9e-06	0.000360634	1.38042	4.07111	32.4715	1.21e-08	9.57e-07	1.49592	4.22839	29.8418	4.69e-08	3.16e-06
3:1:143886161	Hyper	3H	143886161	1	-0.620577	5.40946	13.6085	0.000225162	0.00364859	-0.83193	5.34739	25.3078	4.89e-07	2.05e-05	-0.97558	5.60524	23.5812	1.2e-06	4e-05
3:2:143926398	Hypo	3H	143926398	2	1.31903	2.91835	16.6519	4.49e-05	0.0011085	1.51605	3.05998	17.8551	2.38e-05	0.000462364	1.49036	3.16127	12.5174	0.00040317	0.00348224
3:1:144536720	Hypo	3H	144536720	1	1.23084	3.03494	17.0765	3.59e-05	0.00094119	1.1984	3.06535	19.9638	7.89e-06	0.000193281	1.2639	3.21147	12.779	0.000350531	0.00313341
3:1:144865922	Hyper	3H	144865922	1	-1.08533	2.59736	12.0317	0.000523042	0.0067317	-1.75374	2.58126	25.1414	5.33e-07	2.2e-05	-1.3437	2.88691	11.2647	0.000789932	0.00578939
3:1:145350038	Hypo	3H	145350038	1	1.21072	3.71872	25.6065	4.19e-07	3.23e-05	1.34454	3.82384	26.0644	3.3e-07	1.49e-05	1.85655	4.18587	50.9411	9.52e-13	7.01e-10
3:1:146843672	Hypo	3H	146843672	1	1.30626	3.87585	21.2091	4.12e-06	0.000185864	1.48823	4.01306	34.2869	4.76e-09	4.46e-07	1.60464	4.15301	27.1771	1.86e-07	9.29e-06
3:1:147281397	Hypo	3H	147281397	1	1.1495	4.69262	43.4723	4.3e-11	2.94e-08	1.06059	4.65368	30.1929	3.91e-08	2.57e-06	0.943813	4.69598	18.2045	1.98e-05	0.000352382
3:1:155549787	Hyper	3H	155549787	1	-1.01477	4.50136	32.3104	1.31e-08	2.2e-06	-1.15925	4.49068	32.5801	1.14e-08	9.14e-07	-1.3694	4.75044	32.4854	1.2e-08	1.1e-06
3:1:155746598	Hyper	3H	155746598	1	-0.941514	3.30855	11.4902	0.000699641	0.00827963	-1.22746	3.30977	19.8432	8.41e-06	0.000203306	-1.21053	3.58595	13.9946	0.000183339	0.0019239
3:1:156211666	Hypo	3H	156211666	1	1.11754	4.56367	25.2894	4.93e-07	3.66e-05	1.08838	4.57295	19.554	9.78e-06	0.000229074	0.99297	4.62278	12.1685	0.000486047	0.00400961
3:1:156271249	Hypo	3H	156271249	1	0.980745	5.1695	25.6748	4.04e-07	3.14e-05	1.09606	5.2612	32.3556	1.28e-08	1.01e-06	0.994806	5.30558	18.7299	1.51e-05	0.000284095
3:1:156291546	Hypo	3H	156291546	1	0.798135	5.13583	24.6002	7.05e-07	4.77e-05	0.995635	5.27047	34.7207	3.81e-09	3.76e-07	0.993244	5.38011	28.0236	1.2e-07	6.66e-06
3:1:156441915	Hypo	3H	156441915	1	1.49159	3.41922	31.054	2.51e-08	3.6e-06	1.63866	3.52225	38.3682	5.86e-10	8.13e-08	1.60871	3.59798	27.2536	1.78e-07	8.99e-06
3:1:156491151	Hypo	3H	156491151	1	1.18663	2.68873	11.1935	0.000820822	0.00927167	1.62363	2.91851	20.475	6.04e-06	0.000156187	1.51804	2.99671	13.6217	0.000223582	0.00223818
3:1:157277897	Hyper	3H	157277897	1	-0.573981	5.40559	13.6871	0.000215937	0.00353975	-0.600007	5.41353	12.0748	0.000511088	0.00503139	-0.737878	5.63905	13.7625	0.000207439	0.00211213
3:1:157476075	Hypo	3H	157476075	1	0.766116	4.83973	17.2237	3.32e-05	0.000887985	0.871275	4.91584	20.1354	7.21e-06	0.000180017	1.14109	5.19495	18.9967	1.31e-05	0.000254451
3:1:160157114	Hypo	3H	160157114	1	1.16605	3.30947	18.844	1.42e-05	0.000471661	1.24495	3.38002	18.0078	2.2e-05	0.000432754	1.57181	3.62842	21.6949	3.2e-06	8.49e-05
3:1:160935802	Hypo	3H	160935802	1	1.05213	2.92778	12.4735	0.000412761	0.00567162	1.28059	3.05788	22.6068	1.99e-06	6.43e-05	1.30563	3.19976	16.8703	4e-05	0.000606408
3:1:161105409	Hyper	3H	161105409	1	-1.00021	6.09394	26.8502	2.2e-07	1.96e-05	-0.739815	6.17776	13.391	0.000252841	0.00295463	-1.49694	6.30859	34.2816	4.77e-09	5.37e-07
3:1:164770373	Hyper	3H	164770373	1	-1.15911	5.7923	43.5333	4.17e-11	2.9e-08	-1.29002	5.78098	49.5978	1.89e-12	8.03e-10	-1.36179	6.07553	37.0304	1.16e-09	1.77e-07
3:1:166524842	Hypo	3H	166524842	1	1.25925	3.34792	15.461	8.42e-05	0.00178753	1.43272	3.47426	25.1739	5.24e-07	2.17e-05	1.71639	3.70539	26.3147	2.9e-07	1.32e-05
3:1:166538980	Hyper	3H	166538980	1	-0.831013	3.73301	12.8104	0.000344693	0.00497336	-0.872994	3.76176	13.1867	0.000281937	0.00321571	-1.39267	3.9475	21.0036	4.58e-06	0.000111895
3:1:173900741	Hypo	3H	173900741	1	1.27624	4.05031	21.9165	2.85e-06	0.000139417	1.67705	4.31441	48.2278	3.79e-12	1.38e-09	1.88538	4.50464	52.4659	4.38e-13	3.66e-10
3:1:173948495	Hyper	3H	173948495	1	-0.840821	4.42337	22.1124	2.57e-06	0.000129281	-0.93009	4.41931	18.9884	1.32e-05	0.000288258	-1.4326	4.60979	36.9967	1.18e-09	1.79e-07
3:1:173964255	Hyper	3H	173964255	1	-0.472844	7.27388	16.6208	4.56e-05	0.00111868	-0.526742	7.26406	15.604	7.81e-05	0.00116733	-1.04673	7.3717	41.5201	1.17e-10	2.98e-08
3:1:183569733	Hypo	3H	183569733	1	0.764793	5.27465	20.4382	6.16e-06	0.000252423	0.888228	5.36448	27.445	1.62e-07	8.3e-06	1.68918	6.01064	22.2452	2.4e-06	6.8e-05
3:1:184067986	Hypo	3H	184067986	1	1.12504	3.14912	16.5416	4.76e-05	0.00115439	1.60417	3.41824	34.4776	4.31e-09	4.15e-07	1.72025	3.56601	29.5602	5.42e-08	3.55e-06
3:1:184885310	Hypo	3H	184885310	1	0.720287	4.61237	20.1044	7.33e-06	0.000289196	0.724948	4.62845	16.8434	4.06e-05	0.000703064	0.833938	4.81853	14.0205	0.000180832	0.00190407
3:1:185095715	Hyper	3H	185095715	1	-1.38779	2.48731	14.2667	0.000158646	0.00282811	-1.48417	2.55658	13.6476	0.000220521	0.00265955	-2.03809	2.77224	15.7633	7.18e-05	0.000946654
3:1:186548411	Hypo	3H	186548411	1	0.844884	8.16722	24.1727	8.81e-07	5.68e-05	0.991933	8.28463	40.0628	2.46e-10	3.92e-08	1.59343	8.77347	29.9291	4.48e-08	3.05e-06
3:1:186794451	Hypo	3H	186794451	1	1.54081	2.48185	15.8343	6.91e-05	0.00153998	1.33803	2.48228	10.8287	0.000999365	0.00836908	2.24505	2.94379	21.4905	3.56e-06	9.21e-05
3:1:186861653	Hypo	3H	186861653	1	1.11255	2.81591	13.3306	0.000261114	0.00406818	1.43804	2.99113	20.5699	5.75e-06	0.000150263	1.53717	3.15393	16.5619	4.71e-05	0.000686289
3:1:187010114	Hypo	3H	187010114	1	1.1859	3.59412	21.1562	4.23e-06	0.000189845	1.24825	3.65338	23.2399	1.43e-06	4.92e-05	1.82599	4.07331	34.7982	3.66e-09	4.34e-07
3:1:187425427	Hypo	3H	187425427	1	1.12726	4.5538	32.5182	1.18e-08	2.04e-06	1.11778	4.56322	25.3883	4.69e-07	1.98e-05	1.45352	4.86997	23.4982	1.25e-06	4.15e-05
3:1:187459642	Hyper	3H	187459642	1	-0.626942	4.50662	12.0613	0.00051479	0.00665644	-0.662806	4.51927	12.7742	0.000351431	0.00380378	-0.976248	4.71636	16.8463	4.05e-05	0.000612732
3:1:187463149	Hypo	3H	187463149	1	1.07519	2.8711	11.795	0.000593915	0.00738443	1.44018	3.0704	23.7592	1.09e-06	3.93e-05	1.79531	3.32298	22.1345	2.54e-06	7.12e-05
3:1:187465624	Hypo	3H	187465624	1	1.26047	3.00489	18.3075	1.88e-05	0.000583566	1.37034	3.0942	21.3488	3.83e-06	0.000109033	1.59482	3.29979	18.6102	1.6e-05	0.000297945
3:1:187760220	Hypo	3H	187760220	1	1.46323	3.0245	21.5855	3.38e-06	0.000159635	1.90535	3.27802	42.9911	5.5e-11	1.22e-08	1.96761	3.39889	31.3689	2.13e-08	1.73e-06
3:1:206976643	Hypo	3H	206976643	1	0.934587	5.79049	26.7181	2.35e-07	2.08e-05	0.78323	5.72201	16.1223	5.94e-05	0.000944201	0.760498	5.83232	12.1617	0.000487811	0.00401985
3:1:207081734	Hypo	3H	207081734	1	1.09707	3.87146	23.6652	1.15e-06	6.94e-05	1.10373	3.8917	17.0649	3.61e-05	0.000643038	1.03322	3.97287	14.1447	0.000169274	0.00180705
3:1:208601280	Hypo	3H	208601280	1	1.18019	2.85397	14.8684	0.00011528	0.00223071	1.40848	2.99967	19.2664	1.14e-05	0.000257695	1.46063	3.14397	12.8463	0.00033814	0.00304832
3:1:232452399	Hypo	3H	232452399	1	1.18058	5.21964	31.0784	2.48e-08	3.56e-06	1.34348	5.35032	34.2822	4.77e-09	4.46e-07	1.57321	5.57221	41.0366	1.49e-10	3.6e-08
3:1:244740027	Hypo	3H	244740027	1	1.23387	3.11511	18.2558	1.93e-05	0.000595221	1.308	3.1838	20.4625	6.08e-06	0.000157003	1.28248	3.29469	15.4282	8.57e-05	0.00107741
3:1:244743801	Hypo	3H	244743801	1	1.44714	3.85352	25.1465	5.31e-07	3.86e-05	1.98144	4.1983	58.1327	2.45e-14	2.98e-11	2.00968	4.27611	45.7696	1.33e-11	5.49e-09
3:1:246915549	Hyper	3H	246915549	1	-0.538134	5.53674	18.0476	2.15e-05	0.00064515	-0.642581	5.51472	21.0663	4.44e-06	0.000122637	-1.03832	5.6693	31.4219	2.08e-08	1.69e-06
3:1:249877290	Hyper	3H	249877290	1	-0.93321	4.72888	26.2658	2.98e-07	2.48e-05	-0.751563	4.81384	15.8971	6.69e-05	0.00103593	-0.953317	5.03273	19.3435	1.09e-05	0.000219877
3:1:254744819	Hypo	3H	254744819	1	0.915138	4.12776	20.0127	7.69e-06	0.00029962	1.10299	4.26211	26.2307	3.03e-07	1.38e-05	1.09807	4.37809	17.2241	3.32e-05	0.000526878
3:1:254841520	Hypo	3H	254841520	1	1.02991	4.19011	24.4378	7.67e-07	5.09e-05	1.35106	4.40118	45.3994	1.61e-11	4.38e-09	1.34484	4.48803	30.7356	2.96e-08	2.23e-06
3:1:255279816	Hypo	3H	255279816	1	1.59288	2.4442	18.2124	1.98e-05	0.000604153	1.7966	2.56878	26.1101	3.22e-07	1.46e-05	2.07998	2.80497	19.6641	9.23e-06	0.000192749
3:2:256015630	Hyper	3H	256015630	2	-1.89675	2.29155	20.5129	5.92e-06	0.00024641	-1.49594	2.41541	13.2805	0.000268187	0.00309459	-1.7148	2.64671	11.8486	0.000577038	0.0045756
3:1:256524685	Hypo	3H	256524685	1	1.41381	3.50244	30.8377	2.81e-08	3.92e-06	1.45099	3.55309	30.3199	3.66e-08	2.43e-06	1.14713	3.52984	11.7748	0.000600384	0.00471377
3:1:256588383	Hypo	3H	256588383	1	0.906442	3.5139	13.9082	0.000191963	0.00324655	1.10634	3.64208	17.9944	2.22e-05	0.000435594	0.992129	3.71363	10.3101	0.00132303	0.00853156
3:1:256717843	Hypo	3H	256717843	1	1.24656	2.71298	12.4914	0.000408835	0.00563002	1.46724	2.84801	17.7099	2.57e-05	0.000491189	1.63187	3.05954	12.7608	0.000353954	0.00315673
3:1:256767003	Hypo	3H	256767003	1	1.3681	3.14436	23.2782	1.4e-06	8.04e-05	1.19358	3.10197	16.7568	4.25e-05	0.000729195	1.96525	3.56094	31.7506	1.75e-08	1.48e-06
3:1:256767312	Hypo	3H	256767312	1	1.44912	3.47849	39.2944	3.64e-10	1.43e-07	1.86994	3.7419	49.5612	1.92e-12	8.13e-10	1.65627	3.70087	31.0366	2.53e-08	1.98e-06
3:1:256919584	Hypo	3H	256919584	1	0.944776	3.97362	15.9475	6.51e-05	0.00147019	1.26862	4.17862	30.8714	2.76e-08	1.94e-06	1.29518	4.30452	20.0447	7.57e-06	0.000164492
3:1:257110849	Hypo	3H	257110849	1	0.845268	4.47979	26.0385	3.35e-07	2.73e-05	1.08785	4.6302	35.0401	3.23e-09	3.3e-07	0.769116	4.57859	11.952	0.000545893	0.0043793
3:1:257188865	Hypo	3H	257188865	1	1.66407	3.33843	31.9439	1.59e-08	2.53e-06	1.55526	3.31272	27.0966	1.94e-07	9.61e-06	2.13233	3.73877	30.3681	3.57e-08	2.57e-06
3:1:257693403	Hypo	3H	257693403	1	0.976773	3.14495	11.5556	0.000675462	0.00808348	1.24567	3.30683	19.3668	1.08e-05	0.000246953	1.45812	3.51801	16.2111	5.67e-05	0.000789294
3:1:257815387	Hypo	3H	257815387	1	1.21032	4.9623	41.1346	1.42e-10	7.29e-08	1.37861	5.08628	43.9589	3.35e-11	8.08e-09	1.58733	5.29484	31.1435	2.4e-08	1.9e-06
3:1:267213218	Hypo	3H	267213218	1	0.984297	3.13253	11.9719	0.00054008	0.00689551	1.33371	3.32135	26.995	2.04e-07	1e-05	1.56929	3.55184	21.9296	2.83e-06	7.7e-05
3:1:267656651	Hypo	3H	267656651	1	0.783909	3.77233	12.4442	0.000419288	0.00573285	1.18662	4.01824	26.4223	2.74e-07	1.28e-05	1.46142	4.26064	36.0222	1.95e-09	2.67e-07
3:1:268100353	Hypo	3H	268100353	1	1.08703	4.7862	29.4422	5.76e-08	7.03e-06	1.07963	4.79728	24.1338	8.99e-07	3.35e-05	1.12306	4.93002	21.0075	4.57e-06	0.000111701
3:1:269629229	Hypo	3H	269629229	1	1.18207	3.76026	25.817	3.75e-07	2.98e-05	1.7306	4.11096	45.0899	1.88e-11	4.97e-09	1.61146	4.11718	33.5339	7e-09	7.2e-07
3:1:269653186	Hypo	3H	269653186	1	1.19186	2.95498	12.0516	0.000517468	0.00668018	1.17645	2.99893	10.6776	0.00108439	0.00890906	1.93445	3.45	26.1554	3.15e-07	1.41e-05
3:1:270064075	Hypo	3H	270064075	1	1.2327	4.45996	40.2625	2.22e-10	1e-07	1.54459	4.68065	59.596	1.16e-14	1.68e-11	1.52196	4.74342	42.127	8.55e-11	2.34e-08
3:1:270238381	Hypo	3H	270238381	1	1.49894	2.70584	15.9686	6.44e-05	0.00145882	1.78472	2.87775	21.1687	4.21e-06	0.000117557	2.12913	3.12656	27.5016	1.57e-07	8.15e-06
3:1:270426865	Hypo	3H	270426865	1	0.88404	5.34599	21.8862	2.89e-06	0.000141347	0.816194	5.32835	19.2791	1.13e-05	0.000256492	0.878175	5.48698	14.7351	0.000123722	0.00142809
3:1:270562021	Hypo	3H	270562021	1	0.827107	3.66815	11.9029	0.000560466	0.0070832	1.07423	3.82667	19.9609	7.9e-06	0.000193495	1.38194	4.09177	26.8845	2.16e-07	1.05e-05
3:1:270794785	Hypo	3H	270794785	1	0.826605	3.94633	18.9614	1.33e-05	0.000450931	0.833927	3.96846	18.4582	1.74e-05	0.000358213	0.756287	4.06807	10.4183	0.00124775	0.0081532
3:1:271055598	Hypo	3H	271055598	1	1.30837	3.03782	15.0878	0.000102627	0.00205604	1.6511	3.23417	28.3135	1.03e-07	5.75e-06	1.71555	3.37182	21.1684	4.21e-06	0.000104621
3:1:271117093	Hypo	3H	271117093	1	0.844119	3.70839	12.3498	0.000441038	0.00595164	1.11092	3.8771	21.1835	4.17e-06	0.000116858	1.07621	3.97417	16.2184	5.64e-05	0.000787283
3:1:271462379	Hypo	3H	271462379	1	1.18638	2.75717	14.4256	0.000145809	0.00265613	1.20325	2.81911	13.8223	0.000200935	0.00247726	1.28557	2.98119	12.6094	0.000383811	0.00335436
3:1:271476852	Hypo	3H	271476852	1	1.31047	2.74749	12.6824	0.000369115	0.00523564	1.47133	2.85842	18.5488	1.66e-05	0.000345398	1.82689	3.11358	24.0541	9.37e-07	3.3e-05
3:1:272181133	Hypo	3H	272181133	1	1.22578	2.69983	11.8903	0.000564264	0.00711307	1.43834	2.82205	18.97	1.33e-05	0.000290595	1.5262	2.98725	16.4828	4.91e-05	0.000708731
3:1:272725412	Hyper	3H	272725412	1	-0.877565	4.07588	15.1725	9.81e-05	0.00199024	-1.05346	4.06151	21.1101	4.34e-06	0.000120433	-0.939978	4.37202	10.8969	0.000963279	0.00670634
3:1:273016075	Hypo	3H	273016075	1	0.653829	5.56626	13.7201	0.000212169	0.00349544	0.590623	5.55277	11.6652	0.00063679	0.00594427	0.640671	5.71934	10.1363	0.00145377	0.00916685
3:1:273437450	Hypo	3H	273437450	1	0.929269	3.99774	18.1623	2.03e-05	0.000616742	1.12707	4.131	20.5063	5.94e-06	0.000154269	0.906525	4.13715	11.587	0.000664151	0.00508896
3:1:273475285	Hypo	3H	273475285	1	0.924862	5.18615	25.4852	4.46e-07	3.39e-05	1.14704	5.34753	34.3478	4.61e-09	4.36e-07	0.909108	5.31149	14.5408	0.000137157	0.00154294
3:1:273750475	Hypo	3H	273750475	1	1.17302	5.51998	55.6084	8.84e-14	2.7e-10	1.27238	5.60195	63.2765	1.8e-15	3.81e-12	1.12743	5.60171	30.4103	3.5e-08	2.53e-06
3:1:274092156	Hypo	3H	274092156	1	1.99765	3.27853	35.1654	3.03e-09	7.21e-07	2.29977	3.45153	34.5471	4.16e-09	4.02e-07	2.07081	3.38405	21.1854	4.17e-06	0.000103779
3:1:274771758	Hypo	3H	274771758	1	1.37696	2.57718	17.8934	2.34e-05	0.000684129	1.52551	2.68511	20.5477	5.82e-06	0.000151513	1.7745	2.89678	17.9843	2.23e-05	0.000384921
3:1:274874389	Hypo	3H	274874389	1	0.878357	3.93182	13.6298	0.000222627	0.00361865	1.26588	4.16992	29.9062	4.53e-08	2.93e-06	1.60631	4.47374	28.8477	7.83e-08	4.74e-06
3:1:274897124	Hypo	3H	274897124	1	1.20353	3.78197	19.6367	9.37e-06	0.000347151	0.974474	3.69066	12.9625	0.00031779	0.00352302	1.01348	3.83052	10.2105	0.00139644	0.00889285
3:1:275135952	Hyper	3H	275135952	1	-0.848637	4.92351	26.6994	2.38e-07	2.09e-05	-0.634522	5.02312	14.4403	0.000144673	0.00191356	-1.05734	5.17365	22.7599	1.84e-06	5.57e-05
3:1:275145824	Hyper	3H	275145824	1	-1.13376	4.3716	26.9841	2.05e-07	1.86e-05	-0.90216	4.45701	19.9955	7.76e-06	0.000190661	-0.808351	4.77029	11.1693	0.000831628	0.00600932
3:1:275415103	Hyper	3H	275415103	1	-0.645139	6.21166	20.3574	6.42e-06	0.000260439	-0.681613	6.20864	21.8753	2.91e-06	8.74e-05	-1.11494	6.37117	31.3386	2.17e-08	1.76e-06
3:1:275558481	Hyper	3H	275558481	1	-0.813501	3.61633	15.7147	7.36e-05	0.00161814	-0.859258	3.63793	14.1069	0.000172712	0.00220108	-1.29049	3.838	22.5829	2.01e-06	5.99e-05
3:1:282248074	Hypo	3H	282248074	1	0.861116	4.00162	17.0103	3.72e-05	0.000965658	1.23611	4.23312	35.8903	2.09e-09	2.28e-07	1.13387	4.2826	19.8259	8.48e-06	0.000179805
3:1:282813697	Hypo	3H	282813697	1	0.971654	3.33914	12.7051	0.00036466	0.00518713	1.286	3.5344	19.6061	9.52e-06	0.000224258	1.41647	3.70165	19.2743	1.13e-05	0.00022597
3:1:283215239	Hypo	3H	283215239	1	1.21363	3.06739	12.8359	0.000340025	0.00492391	1.40672	3.18001	21.3946	3.74e-06	0.000106964	1.70092	3.4252	21.0431	4.49e-06	0.000110109
3:1:283218169	Hypo	3H	283218169	1	1.03128	4.29589	25.2246	5.1e-07	3.75e-05	1.25437	4.44765	34.8868	3.49e-09	3.51e-07	0.84883	4.34642	10.7394	0.00104879	0.00713901
3:1:283550772	Hypo	3H	283550772	1	1.18214	3.10659	14.9676	0.000109376	0.0021493	1.45071	3.26915	25.9453	3.51e-07	1.56e-05	1.60389	3.45134	19.3176	1.11e-05	0.000222025
3:1:283774260	Hypo	3H	283774260	1	1.02129	2.94409	11.1148	0.000856415	0.00955824	1.56735	3.23084	21.5558	3.44e-06	0.000100099	1.32802	3.22866	11.6882	0.000628993	0.00488555
3:1:283838146	Hypo	3H	283838146	1	1.10702	3.62294	20.7019	5.37e-06	0.000228594	1.10546	3.64876	19.2029	1.18e-05	0.000264474	1.15941	3.79688	15.8814	6.74e-05	0.000902419
3:1:284637300	Hypo	3H	284637300	1	1.57639	2.68412	16.8894	3.96e-05	0.00101189	1.52315	2.69991	17.6162	2.7e-05	0.000511745	1.48266	2.83188	12.0035	0.000531018	0.00428504
3:1:285377142	Hyper	3H	285377142	1	-1.01406	6.39961	27.5859	1.5e-07	1.47e-05	-0.85879	6.46301	13.8766	0.000195209	0.00242377	-1.67122	6.58373	46.3634	9.82e-12	4.39e-09
3:1:285788867	Hyper	3H	285788867	1	-1.21693	3.67864	23.1494	1.5e-06	8.42e-05	-1.50388	3.658	27.8503	1.31e-07	7.01e-06	-1.15489	4.01679	13.8565	0.00019731	0.00203695
3:1:286617825	Hypo	3H	286617825	1	0.979854	5.30353	29.3372	6.08e-08	7.32e-06	0.960331	5.31402	25.9246	3.55e-07	1.57e-05	0.929071	5.41303	18.1705	2.02e-05	0.000356854
3:1:286896767	Hypo	3H	286896767	1	1.79852	2.72139	17.0061	3.73e-05	0.00096757	1.56709	2.67071	18.7107	1.52e-05	0.000323752	1.5646	2.80087	11.5777	0.000667467	0.00510523
3:1:287059124	Hypo	3H	287059124	1	1.01433	3.64252	17.5711	2.77e-05	0.000777543	1.3556	3.85842	26.0371	3.35e-07	1.51e-05	1.73094	4.14851	40.6211	1.85e-10	4.25e-08
3:1:287238296	Hypo	3H	287238296	1	1.30732	3.12093	20.9599	4.69e-06	0.000205597	1.67621	3.33726	34.2008	4.97e-09	4.61e-07	1.64762	3.41209	31.5686	1.93e-08	1.6e-06
3:1:287817040	Hypo	3H	287817040	1	0.796727	3.3661	11.2217	0.00080845	0.0091839	1.20891	3.60062	27.7518	1.38e-07	7.29e-06	1.08756	3.66118	18.1245	2.07e-05	0.000363809
3:1:288075673	Hypo	3H	288075673	1	1.39785	2.96996	26.8623	2.18e-07	1.95e-05	1.30418	2.96632	17.6705	2.63e-05	0.000499996	1.26034	3.07712	12.4911	0.000408889	0.00352208
3:1:288273074	Hypo	3H	288273074	1	1.08432	3.44351	22.3821	2.23e-06	0.000115521	1.17171	3.51607	20.0399	7.58e-06	0.000187231	1.00896	3.56274	13.3788	0.00025449	0.00246156
3:1:288973470	Hypo	3H	288973470	1	1.6601	2.62516	15.3196	9.08e-05	0.00188566	1.78898	2.73484	25.0788	5.5e-07	2.25e-05	2.12759	2.97649	17.8352	2.41e-05	0.000409838
3:1:289194328	Hypo	3H	289194328	1	1.30016	2.60231	12.9129	0.000326317	0.00478418	1.50667	2.73059	19.6195	9.45e-06	0.000222877	1.69136	2.91791	18.7339	1.5e-05	0.000283707
3:1:289194350	Hypo	3H	289194350	1	1.62446	2.71762	23.0695	1.56e-06	8.71e-05	1.67491	2.78701	24.4946	7.45e-07	2.87e-05	1.75678	2.92089	15.6091	7.79e-05	0.00100439
3:1:289205743	Hyper	3H	289205743	1	-1.41218	2.66028	15.8083	7.01e-05	0.00155603	-1.22692	2.77221	13.346	0.000258974	0.00301092	-2.83775	2.90964	31.5329	1.96e-08	1.62e-06
3:1:289387505	Hypo	3H	289387505	1	0.584386	5.54435	13.0401	0.000304885	0.00454781	0.915223	5.76437	27.1083	1.92e-07	9.56e-06	0.978487	5.91822	22.3645	2.25e-06	6.5e-05
3:1:290164787	Hypo	3H	290164787	1	0.850845	3.7769	14.6489	0.000129512	0.00243449	1.01122	3.88765	18.5362	1.67e-05	0.000346883	1.3725	4.18251	31.2253	2.3e-08	1.84e-06
3:1:290301436	Hypo	3H	290301436	1	1.06173	4.33997	20.4148	6.23e-06	0.000254477	1.19061	4.43846	33.6838	6.48e-09	5.73e-07	1.66796	4.80525	37.1477	1.1e-09	1.68e-07
3:1:290307206	Hypo	3H	290307206	1	0.740879	4.63984	17.3706	3.08e-05	0.000839828	0.986444	4.80406	29.4515	5.73e-08	3.54e-06	0.962436	4.90571	21.0888	4.38e-06	0.000108075
3:1:290373321	Hypo	3H	290373321	1	0.943319	4.01108	22.4631	2.14e-06	0.000111769	0.917276	4.01444	21.478	3.58e-06	0.00010329	0.824403	4.10805	13.3244	0.000261978	0.00251491
3:1:290606347	Hypo	3H	290606347	1	1.65775	2.84847	25.4784	4.47e-07	3.4e-05	1.4876	2.81795	17.5528	2.79e-05	0.000525146	1.66864	3.00007	20.1318	7.23e-06	0.000158721
3:1:293897881	Hyper	3H	293897881	1	-1.5	2.49168	19.8763	8.26e-06	0.000316492	-1.05406	2.62952	10.7587	0.00103789	0.00861381	-2.10432	2.78507	21.7913	3.04e-06	8.16e-05
3:1:309273635	Hyper	3H	309273635	1	-0.587483	5.70821	18.0379	2.17e-05	0.000646828	-0.657342	5.70264	20.4919	5.99e-06	0.000155123	-0.990501	5.87957	29.0513	7.05e-08	4.35e-06
3:1:313720172	Hyper	3H	313720172	1	-0.756631	3.91204	13.1632	0.000285503	0.00433694	-0.795027	3.93977	14.6994	0.000126085	0.00171814	-0.890331	4.18077	12.5863	0.00038859	0.00338355
3:1:316029085	Hyper	3H	316029085	1	-0.980874	3.7546	18.7418	1.5e-05	0.000489416	-0.877149	3.82362	15.4918	8.29e-05	0.00122664	-1.91438	3.94038	35.7873	2.2e-09	2.9e-07
3:1:339884458	Hypo	3H	339884458	1	1.41834	4.61598	36.8344	1.29e-09	3.73e-07	1.64215	4.77577	58.5778	1.95e-14	2.48e-11	1.86197	4.99751	40.4008	2.07e-10	4.64e-08
3:1:346278972	Hypo	3H	346278972	1	1.02995	3.61676	17.0204	3.7e-05	0.000961566	1.35267	3.81664	27.7576	1.38e-07	7.28e-06	1.48681	3.98241	27.3168	1.73e-07	8.76e-06
3:1:346325373	Hypo	3H	346325373	1	0.772671	3.56798	11.0016	0.000910321	0.00997566	1.15087	3.78984	27.0274	2.01e-07	9.9e-06	1.12153	3.89426	16.3753	5.2e-05	0.000739784
3:1:347581386	Hypo	3H	347581386	1	2.02535	3.13622	54.7419	1.37e-13	3.72e-10	2.044	3.17817	42.178	8.33e-11	1.66e-08	1.63452	3.08293	17.6915	2.6e-05	0.000434291
3:1:348322425	Hypo	3H	348322425	1	1.26771	3.92591	33.7895	6.14e-09	1.22e-06	1.03098	3.83047	18.2382	1.95e-05	0.00039386	1.14921	4.01271	16.2363	5.59e-05	0.000781792
3:1:348513650	Hypo	3H	348513650	1	1.06626	4.77043	19.7207	8.96e-06	0.000335902	1.04031	4.78407	15.4965	8.27e-05	0.00122436	1.32877	5.03866	25.4698	4.49e-07	1.86e-05
3:1:348656822	Hyper	3H	348656822	1	-0.549806	5.71752	14.3684	0.000150307	0.00271564	-0.596569	5.70797	13.1107	0.000293614	0.00331347	-1.04262	5.85597	30.7674	2.91e-08	2.2e-06
3:1:348949591	Hypo	3H	348949591	1	1.15496	3.10711	11.922	0.000554757	0.00703194	1.20094	3.16528	14.2177	0.000162829	0.00210035	1.7537	3.54601	20.4246	6.2e-06	0.000140821
3:1:351397736	Hypo	3H	351397736	1	1.26093	2.96556	18.3259	1.86e-05	0.000578868	1.68575	3.20239	37.5718	8.81e-10	1.11e-07	1.3649	3.1715	11.2039	0.000816269	0.00592804
3:1:351519239	Hypo	3H	351519239	1	1.21951	3.44618	19.5614	9.74e-06	0.000357005	1.72866	3.75748	40.5115	1.95e-10	3.25e-08	1.90377	3.92276	37.1348	1.1e-09	1.69e-07
3:1:351519768	Hypo	3H	351519768	1	1.35941	3.17079	18.9623	1.33e-05	0.000450837	1.31208	3.18	21.4488	3.63e-06	0.000104513	1.81158	3.52022	30.8667	2.76e-08	2.12e-06
3:1:351649974	Hypo	3H	351649974	1	1.35075	3.64229	27.9378	1.25e-07	1.27e-05	1.37822	3.68622	26.8037	2.25e-07	1.09e-05	1.41692	3.81076	19.0455	1.28e-05	0.00024896
3:1:351971386	Hypo	3H	351971386	1	1.50503	3.86269	30.7001	3.01e-08	4.17e-06	1.44409	3.85011	18.7957	1.45e-05	0.000311813	1.52342	3.97164	16.5457	4.75e-05	0.000690344
3:1:352235648	Hypo	3H	352235648	1	1.10249	3.15816	17.5595	2.78e-05	0.000781386	1.12758	3.20517	20.4379	6.16e-06	0.000158405	1.48938	3.48535	23.0738	1.56e-06	4.91e-05
3:1:352277873	Hypo	3H	352277873	1	1.21706	2.56296	11.8184	0.000586484	0.00731879	1.34847	2.66296	13.2055	0.000279122	0.00318828	2.15787	3.09032	24.8061	6.34e-07	2.43e-05
3:1:352502000	Hypo	3H	352502000	1	1.05728	4.90257	25.0748	5.51e-07	3.97e-05	1.39679	5.14257	49.2427	2.26e-12	9.26e-10	1.33298	5.17977	33.5801	6.84e-09	7.07e-07
3:1:353069207	Hyper	3H	353069207	1	-1.06539	3.21855	17.0624	3.62e-05	0.000946356	-0.918224	3.29413	13.1303	0.000290555	0.003287	-1.30094	3.50327	17.7868	2.47e-05	0.0004181
3:1:353438691	Hypo	3H	353438691	1	1.40188	2.49923	15.2547	9.39e-05	0.00193339	1.47324	2.57726	16.6449	4.51e-05	0.000761963	2.31176	3.00927	27.5155	1.56e-07	8.1e-06
3:1:353461005	Hypo	3H	353461005	1	0.76892	4.09475	12.8158	0.000343704	0.00496572	1.04594	4.27564	21.6121	3.34e-06	9.78e-05	0.835522	4.28995	11.1503	0.000840172	0.00605201
3:1:353973446	Hypo	3H	353973446	1	1.46258	3.76408	26.5609	2.55e-07	2.2e-05	1.54487	3.83236	34.338	4.63e-09	4.38e-07	2.13005	4.24686	58.6402	1.89e-14	3.46e-11
3:1:354062760	Hypo	3H	354062760	1	1.40156	2.58571	16.8354	4.08e-05	0.00103248	1.35493	2.62106	15.7976	7.05e-05	0.00108021	1.92335	2.92469	19.044	1.28e-05	0.000249101
3:1:354417801	Hypo	3H	354417801	1	0.886682	4.78111	21.473	3.59e-06	0.000166899	0.895015	4.80993	18.6807	1.55e-05	0.000327638	0.952491	4.95727	15.6861	7.48e-05	0.000975297
3:1:354839399	Hypo	3H	354839399	1	1.27552	3.40785	25.9456	3.51e-07	2.83e-05	1.18564	3.39403	20.9923	4.61e-06	0.000126446	1.27028	3.54874	16.4243	5.06e-05	0.000725931
3:1:355503363	Hypo	3H	355503363	1	0.930797	4.07278	18.3699	1.82e-05	0.000569358	1.14412	4.21609	29.3684	5.98e-08	3.67e-06	1.11848	4.31135	23.0135	1.61e-06	5.03e-05
3:1:355788371	Hypo	3H	355788371	1	1.28966	2.97859	20.8947	4.85e-06	0.000210929	1.49756	3.09948	23.5411	1.22e-06	4.32e-05	1.31451	3.13584	14.2047	0.000163957	0.00176306
3:1:355856740	Hypo	3H	355856740	1	1.56729	3.02737	28.3894	9.92e-08	1.06e-05	1.78268	3.16913	33.1538	8.52e-09	7.16e-07	1.57189	3.17973	17.5015	2.87e-05	0.000470394
3:1:355992891	Hypo	3H	355992891	1	1.341	3.29904	21.7707	3.07e-06	0.000148227	1.68367	3.5069	33.3092	7.86e-09	6.72e-07	1.7811	3.64605	24.4001	7.83e-07	2.86e-05
3:1:356061505	Hypo	3H	356061505	1	1.14209	4.46879	24.6006	7.05e-07	4.77e-05	1.51446	4.72737	40.3976	2.07e-10	3.39e-08	1.48565	4.78584	33.3511	7.69e-09	7.69e-07
3:1:356160427	Hypo	3H	356160427	1	1.42479	4.37013	46.5332	9.01e-12	9.66e-09	1.38234	4.36501	36.5661	1.48e-09	1.73e-07	1.62453	4.58238	41.6543	1.09e-10	2.81e-08
3:1:356582913	Hypo	3H	356582913	1	1.19859	2.88551	15.0867	0.000102686	0.00205689	1.526	3.07353	27.3189	1.73e-07	8.76e-06	1.72946	3.26425	20.275	6.71e-06	0.000149792
3:1:356628065	Hypo	3H	356628065	1	0.968542	3.37077	11.3689	0.000746859	0.00866614	1.25014	3.54085	22.5157	2.08e-06	6.68e-05	1.2415	3.64752	19.2528	1.15e-05	0.000228202
3:1:357060194	Hypo	3H	357060194	1	1.24704	3.40354	13.0573	0.000302111	0.00451724	1.70919	3.67425	34.6914	3.86e-09	3.8e-07	1.94987	3.88956	32.8348	1e-08	9.5e-07
3:1:357203931	Hypo	3H	357203931	1	1.47234	3.51014	31.856	1.66e-08	2.61e-06	1.63005	3.62458	37.0275	1.16e-09	1.4e-07	1.79947	3.7901	29.6853	5.08e-08	3.37e-06
3:1:357860286	Hypo	3H	357860286	1	1.32395	3.41195	20.7411	5.26e-06	0.000225009	1.73285	3.65812	44.3061	2.81e-11	6.92e-09	2.00043	3.88589	42.211	8.19e-11	2.28e-08
3:1:357901330	Hypo	3H	357901330	1	1.17269	2.58574	11.8603	0.000573422	0.00720591	1.38982	2.7172	16.0462	6.18e-05	0.000973114	1.55816	2.90009	14.5314	0.000137844	0.0015482
3:1:358007082	Hypo	3H	358007082	1	0.732708	5.04462	17.607	2.72e-05	0.000767673	0.789889	5.10154	19.9252	8.05e-06	0.000196401	0.899203	5.2786	17.6063	2.72e-05	0.00045066
3:1:358954479	Hypo	3H	358954479	1	1.59896	3.9128	44.047	3.21e-11	2.34e-08	1.58616	3.92296	46.3442	9.92e-12	2.98e-09	1.89836	4.18268	49.1824	2.33e-12	1.37e-09
3:1:359475005	Hypo	3H	359475005	1	0.651278	4.64421	15.905	6.66e-05	0.00149758	0.893934	4.79882	26.9328	2.11e-07	1.03e-05	1.08617	5.01542	26.1318	3.19e-07	1.42e-05
3:1:359679229	Hypo	3H	359679229	1	0.905167	3.86079	17.0011	3.74e-05	0.000969491	0.956425	3.90765	16.9462	3.85e-05	0.000674011	1.07929	4.09416	17.0298	3.68e-05	0.000567651
3:1:359832611	Hypo	3H	359832611	1	1.70019	3.62161	39.9877	2.56e-10	1.1e-07	2.03908	3.8422	53.1864	3.03e-13	1.9e-10	2.28005	4.04924	53.1836	3.04e-13	2.75e-10
3:1:360494301	Hypo	3H	360494301	1	0.981332	3.96875	14.571	0.000134977	0.00250831	0.98474	4.00024	15.4827	8.33e-05	0.0012313	1.76334	4.56181	20.7329	5.28e-06	0.000124666
3:1:360869237	Hypo	3H	360869237	1	0.992694	3.06494	12.275	0.000459069	0.00612972	1.49413	3.33383	31.1104	2.44e-08	1.75e-06	1.35999	3.37826	19.213	1.17e-05	0.000232313
3:1:360973211	Hypo	3H	360973211	1	1.26326	3.69787	22.6057	1.99e-06	0.000105669	1.62308	3.92464	38.0731	6.81e-10	9.15e-08	1.74603	4.08174	33.2441	8.13e-09	8.04e-07
3:1:361252616	Hypo	3H	361252616	1	1.83577	2.75675	28.5652	9.06e-08	9.99e-06	1.69688	2.74739	22.1818	2.48e-06	7.69e-05	1.34764	2.75539	11.0019	0.000910179	0.0064218
3:1:361331412	Hypo	3H	361331412	1	1.04334	3.67267	19.2747	1.13e-05	0.000398712	1.4648	3.92936	35.6266	2.39e-09	2.56e-07	1.27966	3.92766	20.0215	7.66e-06	0.000165949
3:1:361831958	Hypo	3H	361831958	1	0.791298	3.49145	11.1577	0.00083683	0.00939736	0.890487	3.57758	11.8862	0.00056551	0.00543156	1.08145	3.81325	11.2062	0.000815245	0.00592346
3:1:361959230	Hypo	3H	361959230	1	1.06014	5.96267	42.5644	6.84e-11	4.13e-08	1.02116	5.95749	38.455	5.6e-10	7.85e-08	0.919064	6.00468	20.6073	5.64e-06	0.000131014
3:1:362368444	Hypo	3H	362368444	1	1.50882	2.39866	11.0639	0.000880263	0.0097386	1.61771	2.50509	17.2825	3.22e-05	0.000586682	1.50569	2.60913	12.68	0.000369587	0.00326376
3:1:362624088	Hypo	3H	362624088	1	1.24358	2.68545	12.4486	0.000418307	0.00572338	1.3911	2.78876	12.0721	0.00051181	0.00503765	1.43334	2.93155	16.2842	5.45e-05	0.000766664
3:1:363437075	Hypo	3H	363437075	1	0.936844	4.11273	19.8063	8.57e-06	0.000324744	1.03273	4.18995	23.8477	1.04e-06	3.78e-05	0.976584	4.27642	17.7969	2.46e-05	0.00041658
3:1:364251335	Hypo	3H	364251335	1	0.912736	3.47525	13.5517	0.000232084	0.00373269	1.20273	3.6504	23.3976	1.32e-06	4.59e-05	1.05335	3.69982	15.2168	9.58e-05	0.00117344
3:1:364356823	Hypo	3H	364356823	1	1.26508	3.19474	18.2048	1.98e-05	0.000606255	1.58006	3.38967	28.2996	1.04e-07	5.77e-06	2.13454	3.82368	26.6872	2.39e-07	1.13e-05
3:1:365179398	Hypo	3H	365179398	1	0.79161	3.70179	13.4038	0.000251111	0.00395948	1.07767	3.87182	24.882	6.09e-07	2.45e-05	0.964285	3.95172	13.429	0.000247766	0.00241388
3:1:365913035	Hypo	3H	365913035	1	1.04148	3.42308	14.1376	0.000169909	0.00297543	1.34127	3.60684	21.8564	2.94e-06	8.82e-05	1.45022	3.76567	16.4135	5.09e-05	0.000728929
3:1:365966386	Hypo	3H	365966386	1	0.817493	3.50402	12.0814	0.000509271	0.00660588	0.944594	3.59515	12.7983	0.000346926	0.00376726	1.37167	3.91483	26.375	2.81e-07	1.28e-05
3:1:366229339	Hypo	3H	366229339	1	1.42869	4.44947	40.2597	2.22e-10	1e-07	1.76419	4.68835	62.4948	2.67e-15	4.95e-12	1.53686	4.61657	33.3921	7.53e-09	7.57e-07
3:1:366256815	Hypo	3H	366256815	1	1.32186	2.81688	14.2041	0.000164016	0.00289716	1.68122	3.01496	23.9564	9.85e-07	3.61e-05	1.6422	3.10361	19.7965	8.61e-06	0.000182005
3:1:366453243	Hypo	3H	366453243	1	0.850199	4.63877	17.0706	3.6e-05	0.000943678	1.14665	4.83854	28.1042	1.15e-07	6.27e-06	1.1066	4.91481	24.6541	6.86e-07	2.58e-05
3:1:366555980	Hypo	3H	366555980	1	1.53703	2.62502	14.1554	0.000168313	0.00295573	1.6658	2.74686	21.2072	4.12e-06	0.000115694	2.00022	2.9676	18.2777	1.91e-05	0.000340887
3:1:367090500	Hypo	3H	367090500	1	1.20625	3.61534	12.0004	0.000531894	0.00681835	1.25202	3.64921	12.003	0.000531143	0.00518675	1.23512	3.76285	12.7338	0.000359113	0.00319221
3:1:367971348	Hypo	3H	367971348	1	1.08136	4.3695	15.0888	0.000102572	0.00205529	0.938571	4.30748	16.0612	6.13e-05	0.000967832	1.18203	4.55376	16.0224	6.26e-05	0.000852531
3:1:368024827	Hypo	3H	368024827	1	0.711236	4.81011	17.6404	2.67e-05	0.000757589	0.94346	4.9695	23.3602	1.34e-06	4.66e-05	1.1155	5.18332	25.4005	4.66e-07	1.92e-05
3:1:368119189	Hypo	3H	368119189	1	1.03419	4.25097	31.4071	2.09e-08	3.15e-06	1.14203	4.32675	30.4155	3.49e-08	2.34e-06	1.51283	4.63048	39.3931	3.47e-10	6.89e-08
3:1:368520878	Hypo	3H	368520878	1	1.39678	2.78274	15.7595	7.19e-05	0.00158792	1.84265	3.02317	28.5201	9.27e-08	5.28e-06	1.79951	3.11787	18.4943	1.7e-05	0.000312745
3:2:369271856	Hypo	3H	369271856	2	1.40895	2.42038	12.9755	0.000315594	0.00466499	1.36753	2.47258	10.4056	0.00125631	0.00994534	1.52183	2.65191	12.6891	0.000367802	0.00325101
3:1:369342876	Hypo	3H	369342876	1	1.06185	3.87209	17.3335	3.14e-05	0.000851933	1.58944	4.20015	43.7687	3.7e-11	8.67e-09	1.75275	4.37505	42.2809	7.91e-11	2.21e-08
3:1:369705311	Hypo	3H	369705311	1	1.36992	2.90757	14.5659	0.000135343	0.00251276	1.33789	2.93949	16.4963	4.87e-05	0.000809378	1.73423	3.2178	15.9925	6.36e-05	0.000862193
3:1:369868690	Hypo	3H	369868690	1	1.22693	3.01366	15.0768	0.000103223	0.00206564	1.70173	3.2747	29.6914	5.07e-08	3.19e-06	1.94319	3.50821	27.0128	2.02e-07	9.94e-06
3:1:370255241	Hypo	3H	370255241	1	1.0274	4.19629	19.4811	1.02e-05	0.000368124	1.07313	4.24566	21.3709	3.78e-06	0.000108018	0.96211	4.30691	13.9185	0.000190906	0.00198494
3:1:370474923	Hyper	3H	370474923	1	-1.7553	2.502	17.5739	2.76e-05	0.000776863	-1.32715	2.63465	10.9101	0.000956405	0.00809416	-2.03493	2.84231	15.5596	7.99e-05	0.00102399
3:1:371013262	Hypo	3H	371013262	1	0.933399	5.53033	51.5957	6.82e-13	1.29e-09	0.990363	5.58254	40.6742	1.8e-10	3.04e-08	1.05141	5.72894	37.4777	9.25e-10	1.47e-07
3:1:371656029	Hypo	3H	371656029	1	1.1218	4.84805	40.1599	2.34e-10	1.04e-07	1.51421	5.11779	56.2063	6.53e-14	6.4e-11	1.33576	5.09052	38.6798	4.99e-10	9.08e-08
3:1:371922195	Hypo	3H	371922195	1	1.44766	3.17142	18.5985	1.61e-05	0.000516975	1.66253	3.30869	24.076	9.26e-07	3.43e-05	1.73733	3.46994	16.849	4.05e-05	0.000611933
3:1:372922403	Hyper	3H	372922403	1	-1.19119	2.80874	13.9075	0.000192035	0.00324685	-1.0881	2.89804	10.9408	0.000940717	0.00799387	-1.72439	3.0863	18.2859	1.9e-05	0.000339787
3:1:373076631	Hypo	3H	373076631	1	1.30012	2.6755	12.4488	0.000418251	0.00572327	1.1426	2.68034	11.001	0.000910634	0.00779788	1.61863	2.96046	14.837	0.000117215	0.00137046
3:1:373443001	Hypo	3H	373443001	1	1.77453	3.9201	37.5292	9.01e-10	2.84e-07	1.70014	3.90005	27.1118	1.92e-07	9.55e-06	1.43945	3.84313	19.3332	1.1e-05	0.000220846
3:1:373932986	Hypo	3H	373932986	1	0.894657	3.64497	17.3415	3.12e-05	0.00084929	1.11812	3.78929	21.3944	3.74e-06	0.000106964	1.06763	3.89324	14.3697	0.000150196	0.00165124
3:1:374599368	Hypo	3H	374599368	1	0.971917	3.21413	13.6326	0.000222288	0.00361457	1.15003	3.3315	16.0306	6.23e-05	0.000979136	1.02265	3.4042	10.5695	0.0011497	0.00764459
3:1:374713509	Hyper	3H	374713509	1	-0.855573	3.12964	13.486	0.000240355	0.00383137	-0.864702	3.1819	12.4233	0.000424013	0.00437543	-1.04662	3.40943	10.2392	0.00137485	0.00878881
3:1:375083246	Hypo	3H	375083246	1	1.10563	3.5903	17.2511	3.28e-05	0.000879057	1.39559	3.76813	32.1613	1.42e-08	1.09e-06	1.61182	3.98369	31.2586	2.26e-08	1.81e-06
3:1:375682824	Hypo	3H	375682824	1	0.928479	3.14432	13.1155	0.000292859	0.00441655	1.29564	3.3499	23.7674	1.09e-06	3.91e-05	1.07927	3.37725	12.5936	0.000387078	0.00337455
3:1:376709601	Hypo	3H	376709601	1	1.24964	3.40789	25.4952	4.43e-07	3.38e-05	1.37398	3.51163	23.2397	1.43e-06	4.92e-05	1.46063	3.65585	23.9116	1.01e-06	3.5e-05
3:1:376953639	Hypo	3H	376953639	1	1.38207	3.05653	16.6415	4.52e-05	0.00111191	1.45246	3.12481	19.8541	8.36e-06	0.000202534	1.47068	3.24303	17.0434	3.65e-05	0.000565015
3:1:377345178	Hypo	3H	377345178	1	0.749243	5.99302	28.0493	1.18e-07	1.22e-05	0.767849	6.02726	22.3353	2.29e-06	7.21e-05	0.907338	6.22705	26.7452	2.32e-07	1.1e-05
3:1:377394390	Hypo	3H	377394390	1	1.51305	3.27531	29.3462	6.05e-08	7.3e-06	1.55495	3.34899	21.0706	4.43e-06	0.00012239	1.7486	3.52439	20.7094	5.35e-06	0.000125721
3:1:377671781	Hypo	3H	377671781	1	1.01997	3.83016	18.4536	1.74e-05	0.000549553	1.48399	4.11756	40.6122	1.86e-10	3.11e-08	1.51919	4.22137	34.5675	4.12e-09	4.79e-07
3:1:377816950	Hypo	3H	377816950	1	1.26283	2.60142	15.2737	9.3e-05	0.00191812	1.28861	2.6685	13.4029	0.000251237	0.00294061	1.68542	2.92523	19.1822	1.19e-05	0.000235515
3:1:378398386	Hypo	3H	378398386	1	1.1019	2.81355	12.4999	0.000406979	0.00561094	1.30654	2.93859	16.8871	3.97e-05	0.000690747	1.50325	3.12408	19.0551	1.27e-05	0.000248264
3:1:378485937	Hypo	3H	378485937	1	1.03767	3.78148	21.3549	3.82e-06	0.000174766	1.14911	3.86495	22.5452	2.05e-06	6.6e-05	1.04087	3.92816	15.4306	8.56e-05	0.0010766
3:1:379112664	Hypo	3H	379112664	1	0.986921	4.22246	27.4416	1.62e-07	1.55e-05	1.28923	4.41796	39.9944	2.55e-10	4.03e-08	1.27001	4.50817	30.7742	2.9e-08	2.2e-06
3:1:379402999	Hypo	3H	379402999	1	1.02066	3.69769	16.6157	4.58e-05	0.00112105	0.980137	3.71016	13.7633	0.000207342	0.0025352	1.22425	3.94726	18.78	1.47e-05	0.000278167
3:1:379515188	Hypo	3H	379515188	1	1.24209	3.65718	24.1069	9.11e-07	5.83e-05	1.6951	3.94068	55.6918	8.48e-14	7.73e-11	1.69027	4.01942	29.4529	5.73e-08	3.68e-06
3:1:380446589	Hyper	3H	380446589	1	-0.950282	3.30658	16.1712	5.79e-05	0.00134357	-1.17892	3.30918	19.534	9.88e-06	0.00023088	-1.53959	3.54	23.2605	1.41e-06	4.56e-05
3:1:380611199	Hypo	3H	380611199	1	1.24862	3.70248	19.4209	1.05e-05	0.000377053	0.944317	3.5749	13.7296	0.000211096	0.00257249	1.21631	3.82223	16.2409	5.58e-05	0.000780441
3:1:380650521	Hypo	3H	380650521	1	0.783024	4.38581	12.188	0.00048097	0.00634427	0.951678	4.50284	20.0803	7.43e-06	0.000184336	1.07554	4.68999	17.5615	2.78e-05	0.000459018
3:1:380695473	Hypo	3H	380695473	1	0.847143	6.30305	22.7455	1.85e-06	9.96e-05	1.00132	6.42446	30.338	3.63e-08	2.42e-06	0.992698	6.52203	26.0917	3.26e-07	1.45e-05
3:1:380854522	Hypo	3H	380854522	1	1.69702	3.03587	29.3888	5.92e-08	7.18e-06	1.82601	3.1352	38.6008	5.2e-10	7.38e-08	1.54458	3.11444	13.1936	0.000280902	0.00265324
3:1:383243800	Hyper	3H	383243800	1	-1.40351	2.9905	24.4993	7.43e-07	4.97e-05	-1.06079	3.11886	14.2911	0.0001566	0.00203658	-1.24827	3.37031	12.6021	0.000385317	0.00336395
3:1:383510149	Hyper	3H	383510149	1	-0.698983	3.64514	11.2688	0.000788207	0.00902194	-0.865802	3.64182	16.5389	4.77e-05	0.000795709	-0.949557	3.90451	10.8392	0.00099372	0.00686213
[truncated: 3,596 more rows]

## Sheet: stable_DMMsRoots
List of stable salt-induced differentially methylated markers in roots.
Differentially methylated markers (DMMs)					75 mM NaCl					150 mM NaCl					200 mM NaCl
DMM location	Methylation	Chromosome	Position	Strand	logFC	logCPM	LR	PValue	FDR	logFC	logCPM	LR	PValue	FDR	logFC	logCPM	LR	PValue	FDR
1:1:1753171	Hypo	1H	1753171	1	2.60717	4.56545	39.3454	3.55e-10	4.83e-08	3.16711	4.66035	65.0916	7.15e-16	1.68e-13	2.79586	5.16956	43.3515	4.57e-11	1.15e-08
1:1:6690199	Hypo	1H	6690199	1	1.6231	4.88734	24.8309	6.26e-07	5.71e-05	1.75458	4.74874	28.5608	9.08e-08	8.87e-06	1.93661	5.50638	30.35	3.61e-08	6.34e-06
1:1:34713674	Hyper	1H	34713674	1	-2.45288	5.34453	81.6403	1.63e-19	5.03e-17	-1.91968	5.20498	51.7486	6.31e-13	1.15e-10	-2.56152	5.87271	56.6585	5.18e-14	1.74e-11
1:1:35423088	Hyper	1H	35423088	1	-2.86601	8.32581	247.157	1.08e-55	2.93e-52	-2.7456	8.12824	216.575	5.05e-49	1.07e-45	-2.97538	8.69601	142.421	7.87e-33	1.24e-29
1:2:39853288	Hyper	1H	39853288	2	-2.11261	4.80267	47.4603	5.61e-12	9.27e-10	-1.56883	4.68751	28.2831	1.05e-07	1.01e-05	-2.196	5.39501	33.8939	5.82e-09	1.14e-06
1:1:50192290	Hypo	1H	50192290	1	1.54395	5.6884	39.0733	4.08e-10	5.52e-08	1.62771	5.53916	38.3223	6e-10	8.01e-08	1.16721	5.87606	14.981	0.000108602	0.0086499
1:1:57617523	Hypo	1H	57617523	1	1.15868	5.42185	23.443	1.29e-06	0.000111662	1.27948	5.28582	24.9797	5.79e-07	4.82e-05	1.1619	5.84263	14.6498	0.000129448	0.00998755
1:1:60005226	Hypo	1H	60005226	1	2.84018	4.26468	38.4057	5.75e-10	7.67e-08	2.87476	4.06993	39.8018	2.81e-10	3.88e-08	2.2705	4.66981	21.5991	3.36e-06	0.000431906
1:2:61003988	Hyper	1H	61003988	2	-4.75998	4.04316	94.6632	2.26e-22	8.62e-20	-4.76267	3.83116	91.0711	1.39e-21	5.53e-19	-4.20615	4.79637	54.9872	1.21e-13	3.89e-11
1:1:66358452	Hypo	1H	66358452	1	1.93515	4.76802	33.6487	6.6e-09	8.08e-07	1.66872	4.42756	20.4583	6.09e-06	0.00038701	1.78239	5.19902	21.3465	3.83e-06	0.000484599
1:2:66491895	Hyper	1H	66491895	2	-2.45999	5.12892	84.6458	3.57e-20	1.15e-17	-2.63914	4.88866	87.6674	7.74e-21	2.87e-18	-2.79223	5.663	59.1222	1.48e-14	5.23e-12
1:1:76172906	Hypo	1H	76172906	1	4.34222	4.68824	94.6869	2.23e-22	8.57e-20	4.36098	4.49552	87.9407	6.74e-21	2.51e-18	3.71269	4.95989	57.06	4.23e-14	1.43e-11
1:1:96282773	Hyper	1H	96282773	1	-1.03763	5.10516	14.3793	0.000149433	0.00640035	-1.20907	4.86897	19.1291	1.22e-05	0.000697925	-1.68556	5.5324	23.2598	1.42e-06	0.000195518
1:1:125343518	Hypo	1H	125343518	1	2.73822	4.43753	48.0536	4.15e-12	6.91e-10	2.25689	3.99741	26.9759	2.06e-07	1.88e-05	1.82523	4.67268	14.9891	0.000108134	0.00863818
1:1:125447112	Hypo	1H	125447112	1	3.78836	4.51558	73.3084	1.11e-17	2.98e-15	3.72066	4.26929	68.9841	9.93e-17	2.5e-14	3.12003	4.80921	39.2173	3.79e-10	8.54e-08
1:2:136975767	Hyper	1H	136975767	2	-1.96234	4.96283	45.045	1.93e-11	3.02e-09	-2.36724	4.69237	56.6995	5.08e-14	1.02e-11	-2.07246	5.53411	33.329	7.78e-09	1.49e-06
1:1:138495362	Hyper	1H	138495362	1	-7.56052	5.99564	378.819	2.25e-84	1.49e-80	-7.56988	5.78013	374.056	2.45e-83	1.48e-79	-6.99861	6.51348	221.395	4.49e-50	2.19e-46
1:1:138821908	Hyper	1H	138821908	1	-3.96404	3.95752	69.6917	6.93e-17	1.76e-14	-2.67045	3.81424	39.8347	2.76e-10	3.83e-08	-2.60137	4.76491	26.7944	2.26e-07	3.57e-05
1:1:142986316	Hypo	1H	142986316	1	3.01361	4.99985	77.3417	1.44e-18	4.21e-16	2.72063	4.61532	60.8531	6.15e-15	1.33e-12	2.56117	5.22326	41.6392	1.1e-10	2.66e-08
1:1:143746922	Hyper	1H	143746922	1	-0.700333	6.95487	15.2153	9.59e-05	0.00457567	-0.946192	6.66674	22.4641	2.14e-06	0.000156986	-1.16737	7.20731	21.5753	3.4e-06	0.000436263
1:1:145281267	Hypo	1H	145281267	1	2.07169	10.4471	139.169	4.05e-32	3.17e-29	1.90407	10.1088	127.131	1.74e-29	1.24e-26	1.5102	10.3175	47.1461	6.59e-12	1.81e-09
1:1:152495418	Hyper	1H	152495418	1	-1.10139	5.33233	17.7526	2.52e-05	0.00152121	-1.17286	5.09971	20.3467	6.46e-06	0.000406179	-1.46365	5.78283	20.626	5.58e-06	0.000680158
1:1:163143430	Hypo	1H	163143430	1	5.84305	13.9626	611.278	5.9e-135	4.31e-130	5.69838	13.6226	809.429	4.81e-178	3.48e-173	5.2735	13.6965	422.982	5.48e-94	2.93e-89
1:1:164859967	Hypo	1H	164859967	1	2.11193	6.44153	77.2683	1.49e-18	4.36e-16	2.23292	6.32295	93.8539	3.4e-22	1.46e-19	1.67951	6.48045	36.3188	1.68e-09	3.49e-07
1:1:172744696	Hyper	1H	172744696	1	-1.92581	4.21622	24.23	8.55e-07	7.68e-05	-2.21615	3.97285	29.7635	4.88e-08	5.02e-06	-1.75798	4.91327	16.0166	6.28e-05	0.00543726
1:1:180138562	Hyper	1H	180138562	1	-1.17423	5.48838	23.5438	1.22e-06	0.000106469	-1.28067	5.25943	27.3244	1.72e-07	1.58e-05	-1.75157	5.8811	30.3695	3.57e-08	6.32e-06
1:1:187761032	Hypo	1H	187761032	1	1.94468	6.31247	71.3186	3.04e-17	7.92e-15	1.62099	5.89118	45.5714	1.47e-11	2.35e-09	1.4355	6.34729	25.9345	3.53e-07	5.41e-05
1:1:211334294	Hypo	1H	211334294	1	1.68356	5.36025	39.8839	2.7e-10	3.74e-08	1.38565	4.98037	24.7207	6.63e-07	5.43e-05	1.38045	5.61597	18.1941	1.99e-05	0.00209671
1:1:211704892	Hypo	1H	211704892	1	2.8036	5.71438	99.7207	1.75e-23	7.32e-21	2.61227	5.37272	85.1294	2.79e-20	9.76e-18	2.32586	5.78606	49.5227	1.96e-12	5.65e-10
1:1:274549009	Hyper	1H	274549009	1	-4.58849	3.96835	85.5861	2.22e-20	7.29e-18	-4.59879	3.7594	82.2107	1.22e-19	3.93e-17	-4.05133	4.73908	50.1176	1.45e-12	4.24e-10
1:2:276415090	Hypo	1H	276415090	2	5.09795	4.96819	130.761	2.79e-30	1.92e-27	5.26254	4.87347	139.989	2.68e-32	2.42e-29	4.56176	5.24422	89.611	2.9e-21	1.9e-18
1:1:278887722	Hypo	1H	278887722	1	2.10615	5.32857	55.8653	7.76e-14	1.48e-11	1.79468	4.9468	35.7243	2.27e-09	2.82e-07	1.53034	5.46255	19.7711	8.73e-06	0.00100195
1:1:281128011	Hypo	1H	281128011	1	3.98779	4.47205	70.4176	4.8e-17	1.23e-14	4.17271	4.36934	77.7323	1.18e-18	3.49e-16	3.74065	4.95764	57.292	3.76e-14	1.28e-11
1:1:306241523	Hypo	1H	306241523	1	3.77098	4.21122	54.5352	1.53e-13	2.84e-11	3.62506	3.93226	48.4741	3.35e-12	5.6e-10	3.38171	4.73161	41.3398	1.28e-10	3.05e-08
1:1:312058272	Hyper	1H	312058272	1	-3.80948	4.89056	118.457	1.38e-27	7.44e-25	-4.5361	4.63588	141.068	1.55e-32	1.44e-29	-3.87467	5.48973	81.3339	1.91e-19	1.12e-16
1:1:365051452	Hypo	1H	365051452	1	2.16803	6.44229	95.974	1.16e-22	4.54e-20	2.06952	6.1726	82.5539	1.03e-19	3.32e-17	1.70075	6.4667	37.6428	8.5e-10	1.86e-07
1:2:425094757	Hyper	1H	425094757	2	-1.25455	5.51723	27.1872	1.85e-07	1.84e-05	-1.25628	5.29734	25.518	4.38e-07	3.73e-05	-1.4893	5.957	23.9592	9.84e-07	0.000139535
1:1:428045318	Hypo	1H	428045318	1	5.20329	7.47449	401.698	2.35e-89	1.72e-85	5.39542	7.44561	391.915	3.17e-87	2.29e-83	4.98294	7.58404	255.832	1.39e-57	9.31e-54
1:2:429417335	Hyper	1H	429417335	2	-3.10021	4.19183	56.6275	5.27e-14	1.02e-11	-2.62329	4.01035	43.8089	3.62e-11	5.5e-09	-2.78516	4.90923	33.9258	5.73e-09	1.13e-06
1:1:429513915	Hyper	1H	429513915	1	-1.17494	5.51206	23.1781	1.48e-06	0.000126499	-0.972074	5.35959	13.3017	0.000265165	0.00735601	-1.52432	5.94127	24.3308	8.11e-07	0.000116281
1:1:429514632	Hyper	1H	429514632	1	-0.855681	7.72037	22.2537	2.39e-06	0.00019635	-0.774172	7.54703	14.1108	0.000172355	0.00538872	-1.36459	7.94553	32.0929	1.47e-08	2.73e-06
1:1:435689351	Hyper	1H	435689351	1	-4.48802	5.78359	115.129	7.37e-27	3.82e-24	-5.10614	5.54063	152.019	6.28e-35	6.57e-32	-3.54538	6.33133	101.32	7.83e-24	6.66e-21
1:1:443722260	Hypo	1H	443722260	1	5.84484	5.49539	206.389	8.43e-47	1.5e-43	5.30124	4.89459	146.974	7.95e-34	7.87e-31	4.74023	5.34044	99.6867	1.79e-23	1.39e-20
1:1:443731967	Hypo	1H	443731967	1	5.7422	4.76113	112.198	3.23e-26	1.62e-23	5.9366	4.6733	129.354	5.68e-30	4.27e-27	5.34984	5.27402	107.729	3.08e-25	3.18e-22
1:1:455619601	Hyper	1H	455619601	1	-5.21726	4.27164	115.635	5.71e-27	3e-24	-4.95303	4.06165	106.232	6.56e-25	3.46e-22	-4.67094	4.99571	71.2754	3.11e-17	1.36e-14
1:2:456698152	Hypo	1H	456698152	2	3.25807	4.35705	52.9187	3.48e-13	6.3e-11	3.58685	4.32908	64.4604	9.85e-16	2.28e-13	2.89043	4.8071	35.1535	3.05e-09	6.19e-07
2:1:2149634	Hypo	2H	2149634	1	1.38659	4.98691	20.0077	7.71e-06	0.000555699	1.53919	4.86541	29.0864	6.92e-08	6.96e-06	1.5754	5.52061	22.0243	2.69e-06	0.000351977
2:1:2183754	Hypo	2H	2183754	1	1.29446	5.38159	23.6256	1.17e-06	0.000102474	1.16807	5.10374	18.5435	1.66e-05	0.00089563	1.21802	5.76763	15.33	9.03e-05	0.00749016
2:1:15414469	Hypo	2H	15414469	1	4.03249	5.35132	105.176	1.12e-24	5.1e-22	4.09755	5.18747	114.932	8.15e-27	4.99e-24	3.44663	5.42185	70.4181	4.8e-17	2.04e-14
2:1:17517122	Hypo	2H	17517122	1	3.26852	4.81416	76.6521	2.04e-18	5.86e-16	2.78909	4.32889	51.1548	8.54e-13	1.53e-10	2.6007	4.98757	35.567	2.46e-09	5.04e-07
2:2:28035544	Hyper	2H	28035544	2	-4.82139	4.06969	99.8641	1.63e-23	6.85e-21	-4.82575	3.85847	95.5532	1.44e-22	6.46e-20	-4.27247	4.82308	57.0635	4.22e-14	1.43e-11
2:1:40476857	Hypo	2H	40476857	1	2.09932	8.70168	129.209	6.1e-30	4.05e-27	2.14315	8.53193	139.75	3.02e-32	2.69e-29	1.73149	8.71661	55.149	1.12e-13	3.63e-11
2:1:46751807	Hypo	2H	46751807	1	5.39519	4.8932	131.943	1.54e-30	1.09e-27	5.80707	4.9733	157.278	4.45e-36	5.11e-33	5.12308	5.38076	109.723	1.13e-25	1.18e-22
2:1:72688878	Hypo	2H	72688878	1	2.67985	4.49604	40.5788	1.89e-10	2.67e-08	2.58406	4.23174	38.5197	5.42e-10	7.29e-08	2.40492	4.92324	29.0505	7.05e-08	1.2e-05
2:1:73795758	Hyper	2H	73795758	1	-1.22062	6.26691	32.341	1.29e-08	1.53e-06	-1.40403	5.99954	44.3546	2.74e-11	4.22e-09	-1.49458	6.63164	29.6612	5.15e-08	8.87e-06
2:1:83078931	Hypo	2H	83078931	1	5.48304	6.99857	375.689	1.08e-83	6.57e-80	5.61775	6.92022	374.831	1.66e-83	1.09e-79	5.20364	7.11061	235.89	3.1e-53	1.66e-49
2:1:90921756	Hypo	2H	90921756	1	3.19368	6.89973	204.541	2.13e-46	3.62e-43	3.13287	6.64948	163.775	1.69e-37	2.15e-34	2.69286	6.82878	90.0871	2.28e-21	1.51e-18
2:1:99419999	Hypo	2H	99419999	1	4.8935	5.39414	160.249	9.98e-37	1.01e-33	5.29975	5.49644	211.509	6.44e-48	1.33e-44	4.7643	5.79139	130.259	3.6e-30	5.07e-27
2:1:107769812	Hyper	2H	107769812	1	-1.96656	4.07357	23.8392	1.05e-06	9.24e-05	-1.88495	3.87082	22.8237	1.78e-06	0.000133248	-2.71483	4.7394	27.8407	1.32e-07	2.15e-05
2:2:116636269	Hyper	2H	116636269	2	-5.22773	5.46478	229.976	6.03e-52	1.38e-48	-4.99025	5.25444	223.134	1.87e-50	4.23e-47	-4.22668	6.04869	119.101	9.95e-28	1.24e-24
2:2:166816993	Hyper	2H	166816993	2	-0.866404	6.80369	21.0023	4.59e-06	0.000355042	-1.16203	6.50859	32.9581	9.42e-09	1.09e-06	-1.09273	7.14548	18.5979	1.61e-05	0.001722
2:2:172622794	Hypo	2H	172622794	2	2.73635	7.37895	184.287	5.62e-42	8.04e-39	2.54287	7.02206	151.116	9.88e-35	1.02e-31	2.26991	7.3256	76.782	1.91e-18	1.01e-15
2:1:234096028	Hypo	2H	234096028	1	0.971468	6.13636	19.1383	1.22e-05	0.000817834	1.25905	6.11294	33.9106	5.77e-09	6.89e-07	1.09643	6.57713	16.4547	4.98e-05	0.00449625
2:1:265291715	Hypo	2H	265291715	1	2.27396	5.3925	68.2017	1.48e-16	3.64e-14	2.06285	5.05255	50.4064	1.25e-12	2.21e-10	1.71886	5.49026	25.3212	4.85e-07	7.21e-05
2:1:301143736	Hypo	2H	301143736	1	1.55182	5.18818	31.2324	2.29e-08	2.59e-06	1.61354	5.01888	31.8448	1.67e-08	1.85e-06	1.40322	5.54602	17.9681	2.25e-05	0.00231201
2:2:308834315	Hyper	2H	308834315	2	-1.33553	4.8827	15.6808	7.5e-05	0.00371519	-1.1403	4.72426	12.8857	0.000331095	0.0085119	-2.27124	5.34705	34.072	5.31e-09	1.05e-06
2:1:366950763	Hyper	2H	366950763	1	-1.27143	4.70407	16.3449	5.28e-05	0.00278834	-1.84655	4.39012	32.2369	1.36e-08	1.54e-06	-1.78654	5.21799	21.6476	3.28e-06	0.000423163
2:1:372998531	Hypo	2H	372998531	1	2.6346	4.3261	39.0017	4.23e-10	5.7e-08	2.31053	3.97346	26.1958	3.08e-07	2.7e-05	2.19573	4.75204	21.8034	3.02e-06	0.00039109
2:1:388993198	Hyper	2H	388993198	1	-3.72998	4.26013	80.5957	2.77e-19	8.42e-17	-3.55507	4.06658	72.7748	1.45e-17	3.96e-15	-3.56501	4.98665	50.0119	1.53e-12	4.45e-10
2:1:390678374	Hyper	2H	390678374	1	-4.43184	4.05293	84.4658	3.91e-20	1.25e-17	-4.76036	3.83077	90.3885	1.96e-21	7.77e-19	-4.20694	4.79663	54.9925	1.21e-13	3.89e-11
2:1:391329555	Hypo	2H	391329555	1	3.73269	4.94319	104.633	1.47e-24	6.62e-22	3.51227	4.6039	83.3948	6.72e-20	2.24e-17	3.2912	5.20929	59.0559	1.53e-14	5.37e-12
2:1:391577109	Hypo	2H	391577109	1	4.43302	5.96758	216.472	5.32e-49	1.08e-45	4.22135	5.61221	163.784	1.69e-37	2.15e-34	4.04767	6.08369	124.475	6.63e-29	9.11e-26
2:1:394346575	Hypo	2H	394346575	1	2.16373	4.87046	39.771	2.86e-10	3.95e-08	1.97313	4.55769	33.476	7.21e-09	8.51e-07	1.72935	5.14927	20.0744	7.45e-06	0.000871746
2:2:397802479	Hypo	2H	397802479	2	1.80942	5.44246	39.8991	2.67e-10	3.72e-08	1.92078	5.31031	45.4954	1.53e-11	2.44e-09	1.41787	5.64397	18.716	1.52e-05	0.00163284
2:1:402010091	Hyper	2H	402010091	1	-7.28112	5.74918	351.695	1.81e-78	9.44e-75	-7.28729	5.53165	345.671	3.71e-77	1.92e-73	-6.71564	6.28857	198.483	4.48e-45	1.33e-41
2:1:402255502	Hypo	2H	402255502	1	3.82019	4.78859	94.4753	2.48e-22	9.34e-20	3.52553	4.40745	72.6415	1.55e-17	4.19e-15	3.14057	4.98666	46.2269	1.05e-11	2.81e-09
2:1:409129557	Hypo	2H	409129557	1	2.32688	5.427	62.3826	2.83e-15	6.31e-13	2.21005	5.1409	57.88	2.79e-14	5.69e-12	2.18872	5.73901	43.7347	3.76e-11	9.51e-09
2:1:411366479	Hyper	2H	411366479	1	-1.47924	4.31727	17.2862	3.22e-05	0.00186083	-1.42222	4.11778	15.7384	7.27e-05	0.00288799	-1.63977	4.96507	14.636	0.000130397	0.00998755
2:1:413666063	Hypo	2H	413666063	1	1.58742	4.79304	26.1672	3.13e-07	3.01e-05	1.19133	4.39101	13.022	0.000307858	0.00810479	1.47395	5.23881	16.1823	5.75e-05	0.00507195
2:2:413739940	Hypo	2H	413739940	2	5.12759	4.9863	138.703	5.12e-32	3.97e-29	5.08076	4.753	125.471	4.01e-29	2.82e-26	4.3146	5.11991	76.7422	1.95e-18	1.02e-15
2:1:421456556	Hypo	2H	421456556	1	0.876836	7.65334	19.1068	1.24e-05	0.00082989	1.30803	7.73333	45.445	1.57e-11	2.5e-09	1.14937	8.14545	23.0945	1.54e-06	0.000210904
2:1:423161242	Hypo	2H	423161242	1	2.70416	4.12173	33.6306	6.66e-09	8.15e-07	2.82118	3.9605	34.9074	3.46e-09	4.22e-07	2.23603	4.61922	20.0493	7.55e-06	0.000879423
2:1:427166883	Hypo	2H	427166883	1	5.31346	4.84504	122.661	1.65e-28	9.5e-26	5.68802	4.88956	144.41	2.89e-33	2.79e-30	5.08037	5.35118	106.405	6.01e-25	6.08e-22
2:2:431985060	Hypo	2H	431985060	2	2.83156	4.84733	59.2495	1.39e-14	2.89e-12	2.16439	4.27382	32.1245	1.45e-08	1.62e-06	1.99553	4.95939	22.3286	2.3e-06	0.000306354
2:1:434754258	Hypo	2H	434754258	1	3.17608	4.70039	64.748	8.51e-16	1.98e-13	3.29805	4.56618	71.5624	2.69e-17	7.22e-15	3.06898	5.16027	51.3934	7.56e-13	2.25e-10
2:1:443658857	Hyper	2H	443658857	1	-2.00211	4.72239	45.6914	1.38e-11	2.21e-09	-2.02879	4.52711	39.0791	4.07e-10	5.55e-08	-2.20433	5.30386	33.0237	9.1e-09	1.74e-06
2:1:448420976	Hypo	2H	448420976	1	2.49041	4.59537	45.2508	1.73e-11	2.73e-09	2.94165	4.64799	67.2151	2.43e-16	5.92e-14	2.43498	5.09645	34.675	3.9e-09	7.79e-07
2:1:449745854	Hyper	2H	449745854	1	-4.95301	4.13604	101.47	7.26e-24	3.15e-21	-4.69007	3.92739	91.2979	1.24e-21	5.05e-19	-4.40756	4.87876	61.3517	4.77e-15	1.73e-12
2:1:453464739	Hypo	2H	453464739	1	1.55126	4.35265	17.5134	2.85e-05	0.00168592	1.7839	4.25202	24.3303	8.12e-07	6.55e-05	1.75011	4.98997	17.8746	2.36e-05	0.00239983
2:1:453807021	Hypo	2H	453807021	1	2.58067	4.51404	47.9728	4.32e-12	7.19e-10	2.53216	4.29277	42.5591	6.86e-11	1.01e-08	1.81668	4.78637	16.1571	5.83e-05	0.00511742
2:1:454442977	Hypo	2H	454442977	1	4.30693	4.48772	77.9132	1.08e-18	3.18e-16	4.43599	4.35206	84.3879	4.07e-20	1.4e-17	3.82128	4.89718	55.5394	9.16e-14	2.99e-11
2:1:457282215	Hypo	2H	457282215	1	2.64915	5.31931	76.826	1.87e-18	5.41e-16	2.69131	5.14201	75.2826	4.08e-18	1.16e-15	2.41511	5.59331	47.3137	6.05e-12	1.67e-09
2:2:458106099	Hypo	2H	458106099	2	1.81579	4.51855	29.5844	5.35e-08	5.76e-06	1.55047	4.19676	17.5112	2.86e-05	0.00138994	1.66443	5.00145	17.0017	3.73e-05	0.00354943
2:1:460304572	Hypo	2H	460304572	1	1.61679	7.33775	75.3678	3.91e-18	1.11e-15	1.63473	7.14839	72.6687	1.53e-17	4.15e-15	1.24007	7.40609	26.0949	3.25e-07	5.05e-05
2:2:460814920	Hypo	2H	460814920	2	4.20919	5.71363	165.281	7.94e-38	8.78e-35	4.03695	5.37834	149.768	1.95e-34	1.98e-31	3.49751	5.63985	83.9884	4.98e-20	3.05e-17
2:1:460917786	Hypo	2H	460917786	1	2.19076	4.12553	24.9938	5.75e-07	5.3e-05	2.36318	3.98747	27.9791	1.23e-07	1.16e-05	1.90662	4.66511	15.7653	7.17e-05	0.00609915
2:1:462501829	Hypo	2H	462501829	1	4.08729	4.54302	80.9655	2.3e-19	7.01e-17	3.26749	3.92452	41.6793	1.08e-10	1.55e-08	3.21164	4.77047	39.5224	3.24e-10	7.4e-08
2:2:462599967	Hyper	2H	462599967	2	-4.34018	4.13897	83.6127	6.02e-20	1.91e-17	-4.17317	3.93034	78.2212	9.21e-19	2.75e-16	-3.96296	4.87754	52.4326	4.45e-13	1.35e-10
2:1:463007416	Hypo	2H	463007416	1	4.08557	8.53929	373.19	3.78e-83	2.12e-79	4.12844	8.37792	355.472	2.73e-79	1.52e-75	3.74262	8.50727	205.738	1.17e-46	4.18e-43
2:1:464382955	Hypo	2H	464382955	1	1.8082	5.81952	52.0223	5.49e-13	9.77e-11	1.66891	5.52619	43.1654	5.03e-11	7.5e-09	1.56556	6.05166	27.6664	1.44e-07	2.34e-05
2:1:464819892	Hyper	2H	464819892	1	-1.0866	5.12337	18.3101	1.88e-05	0.00118305	-1.2463	4.85396	21.1903	4.16e-06	0.000279044	-1.64888	5.55176	23.2918	1.39e-06	0.000192786
2:1:465919853	Hypo	2H	465919853	1	1.53602	5.61725	39.6958	2.97e-10	4.09e-08	1.33673	5.28929	29.0127	7.19e-08	7.17e-06	1.22816	5.84005	16.3548	5.25e-05	0.00470019
2:2:466073756	Hyper	2H	466073756	2	-3.43437	4.23021	63.3216	1.76e-15	4.03e-13	-4.09972	3.98979	79.6301	4.52e-19	1.38e-16	-3.23334	4.94568	42.4907	7.1e-11	1.75e-08
2:2:466259954	Hypo	2H	466259954	2	3.65159	4.57624	68.5427	1.24e-16	3.09e-14	3.31581	4.18468	52.0649	5.37e-13	9.98e-11	3.22328	4.9376	46.1205	1.11e-11	2.95e-09
2:1:467129009	Hyper	2H	467129009	1	-1.48771	5.08446	22.4295	2.18e-06	0.000180799	-1.27492	4.91983	18.953	1.34e-05	0.000752295	-1.80875	5.59024	26.6382	2.45e-07	3.85e-05
2:1:467135271	Hypo	2H	467135271	1	2.17879	6.89686	104.997	1.22e-24	5.54e-22	2.18314	6.70199	93.96	3.22e-22	1.39e-19	1.68417	6.86922	40.9603	1.55e-10	3.65e-08
2:1:468271051	Hypo	2H	468271051	1	4.61413	7.09009	336.276	4.13e-75	1.88e-71	4.74759	7.01622	316.835	7.09e-71	3.41e-67	4.39888	7.22942	205.574	1.27e-46	4.25e-43
2:1:479181477	Hyper	2H	479181477	1	-2.91887	7.24054	153.153	3.55e-35	3.36e-32	-2.63127	7.06104	124.66	6.04e-29	4.2e-26	-2.68495	7.68131	101.941	5.72e-24	5.11e-21
2:1:491451395	Hyper	2H	491451395	1	-0.928746	6.26676	23.8638	1.03e-06	9.17e-05	-0.949164	6.05342	21.7984	3.03e-06	0.000212902	-1.12486	6.64232	17.894	2.34e-05	0.00238919
2:1:503583815	Hyper	2H	503583815	1	-2.52665	4.02257	34.0561	5.35e-09	6.66e-07	-2.42904	3.82994	30.2197	3.86e-08	4.06e-06	-2.7541	4.74166	28.2533	1.06e-07	1.76e-05
2:1:504492057	Hyper	2H	504492057	1	-1.18466	5.26191	21.8386	2.97e-06	0.000239431	-1.51743	4.96591	31.3383	2.17e-08	2.36e-06	-1.86481	5.66785	30.5721	3.22e-08	5.79e-06
2:1:504594491	Hyper	2H	504594491	1	-5.77844	4.60302	167.231	2.98e-38	3.51e-35	-5.78455	4.38989	162.567	3.11e-37	3.81e-34	-5.21486	5.27481	97.3897	5.69e-23	4.24e-20
2:2:505023366	Hyper	2H	505023366	2	-2.13248	4.14417	30.8641	2.77e-08	3.09e-06	-2.75401	3.86992	41.4742	1.19e-10	1.71e-08	-2.87127	4.81158	31.5975	1.9e-08	3.46e-06
2:1:506755923	Hypo	2H	506755923	1	3.70082	5.95838	183.761	7.32e-42	1.03e-38	3.666	5.73485	167.169	3.07e-38	4.63e-35	3.36975	6.08911	100.764	1.04e-23	8.68e-21
2:1:514899309	Hypo	2H	514899309	1	2.56241	4.98243	61.0204	5.65e-15	1.22e-12	2.42269	4.694	53.3035	2.86e-13	5.46e-11	2.11296	5.219	30.4206	3.48e-08	6.17e-06
2:1:524828222	Hypo	2H	524828222	1	3.75533	5.15727	111.39	4.86e-26	2.4e-23	3.77612	4.9647	116.7	3.34e-27	2.08e-24	3.52687	5.48081	76.9375	1.76e-18	9.46e-16
2:1:541147893	Hyper	2H	541147893	1	-2.05601	4.19004	31.9717	1.56e-08	1.82e-06	-2.16013	3.96463	32.5091	1.19e-08	1.35e-06	-2.36401	4.85497	25.4559	4.53e-07	6.74e-05
2:2:541308280	Hyper	2H	541308280	2	-5.34508	4.34458	126.565	2.31e-29	1.48e-26	-5.34859	4.1303	124.321	7.17e-29	4.9e-26	-4.79365	5.05439	76.705	1.99e-18	1.03e-15
2:1:541816021	Hyper	2H	541816021	1	-1.69689	4.99257	37.0144	1.17e-09	1.51e-07	-1.61897	4.79616	33.6807	6.49e-09	7.69e-07	-1.57638	5.57444	21.6236	3.32e-06	0.000427466
2:1:543678039	Hypo	2H	543678039	1	3.141	4.73059	74.114	7.37e-18	2.03e-15	2.82875	4.34904	51.3536	7.71e-13	1.39e-10	2.29538	4.86462	26.23	3.03e-07	4.72e-05
2:1:545131372	Hyper	2H	545131372	1	-1.46161	5.16278	23.5789	1.2e-06	0.000104744	-1.38543	4.96987	20.9122	4.81e-06	0.000315589	-1.85249	5.64026	29.6412	5.2e-08	8.93e-06
2:1:552816070	Hypo	2H	552816070	1	2.07607	4.86553	43.1791	5e-11	7.49e-09	1.75611	4.4814	27.673	1.44e-07	1.34e-05	1.57609	5.11005	17.115	3.52e-05	0.00338801
2:1:554902331	Hyper	2H	554902331	1	-2.02691	8.54104	126.643	2.22e-29	1.44e-26	-2.06837	8.32328	132.137	1.4e-30	1.07e-27	-2.43188	8.8433	101.603	6.78e-24	5.87e-21
2:1:558711488	Hypo	2H	558711488	1	1.9005	5.17528	42.8995	5.76e-11	8.58e-09	1.82873	4.92725	36.4052	1.6e-09	2.04e-07	1.7245	5.5075	25.4992	4.43e-07	6.61e-05
2:1:560799039	Hypo	2H	560799039	1	4.83679	7.82667	414.14	4.6e-92	3.73e-88	4.73034	7.52809	394.456	8.87e-88	7.12e-84	4.32391	7.66806	221.222	4.9e-50	2.19e-46
2:2:566486087	Hypo	2H	566486087	2	3.08527	4.55728	60.6739	6.74e-15	1.45e-12	3.04858	4.33253	56.1882	6.59e-14	1.32e-11	2.72768	4.94303	36.8793	1.26e-09	2.66e-07
2:1:589436685	Hypo	2H	589436685	1	3.37723	4.42791	56.8758	4.64e-14	9.08e-12	3.48916	4.28244	60.2073	8.54e-15	1.82e-12	2.66265	4.73649	28.5542	9.11e-08	1.53e-05
2:1:589869796	Hyper	2H	589869796	1	-2.31564	4.19279	37.4356	9.45e-10	1.23e-07	-2.00821	4.0303	29.8208	4.74e-08	4.89e-06	-2.16414	4.91403	23.0944	1.54e-06	0.000210904
2:1:612650027	Hypo	2H	612650027	1	2.05889	7.9875	144.679	2.52e-33	2.09e-30	1.97291	7.72229	112.986	2.17e-26	1.27e-23	1.56703	7.93701	43.8237	3.59e-11	9.13e-09
2:1:613637911	Hypo	2H	613637911	1	2.3415	8.0963	179.49	6.26e-41	8.46e-38	2.11446	7.71629	127.253	1.64e-29	1.18e-26	1.88892	8.0509	63.0982	1.97e-15	7.22e-13
2:1:614680311	Hypo	2H	614680311	1	2.18928	4.74018	29.6755	5.11e-08	5.53e-06	1.94152	4.40743	23.8083	1.06e-06	8.31e-05	1.80975	5.07216	19.7988	8.6e-06	0.0009921
2:2:623944952	Hyper	2H	623944952	2	-4.59139	4.13142	91.1508	1.33e-21	4.65e-19	-4.93101	3.90929	97.2683	6.05e-23	2.77e-20	-4.37931	4.86706	60.3373	7.99e-15	2.88e-12
3:1:6344421	Hypo	3H	6344421	1	5.87417	5.23713	123.938	8.69e-29	5.2e-26	5.80473	4.96913	118.776	1.17e-27	7.57e-25	5.53353	5.63181	136.233	1.77e-31	2.64e-28
3:1:6440905	Hypo	3H	6440905	1	3.79097	5.99675	63.0043	2.06e-15	4.7e-13	4.07874	6.02382	76.1782	2.59e-18	7.49e-16	3.26113	5.98194	76.6966	1.99e-18	1.03e-15
3:1:15018780	Hypo	3H	15018780	1	1.39816	4.71511	17.4573	2.94e-05	0.00172805	1.46316	4.53639	18.3504	1.84e-05	0.000977983	1.41897	5.21803	14.9117	0.000112662	0.00888074
3:1:36208813	Hypo	3H	36208813	1	1.59066	5.84637	42.178	8.33e-11	1.22e-08	1.61507	5.6551	43.6008	4.03e-11	6.1e-09	1.4302	6.11942	24.3952	7.85e-07	0.000113061
3:1:36245092	Hypo	3H	36245092	1	2.48546	4.10248	31.2873	2.23e-08	2.53e-06	2.10221	3.7475	18.7461	1.49e-05	0.000822533	1.91488	4.57713	15.5929	7.85e-05	0.00664099
3:2:46157687	Hyper	3H	46157687	2	-2.35858	3.71912	26.9032	2.14e-07	2.11e-05	-2.86257	3.49132	33.9076	5.78e-09	6.89e-07	-2.14016	4.52317	16.3547	5.25e-05	0.00470019
3:1:50633953	Hypo	3H	50633953	1	3.75335	4.18805	54.2604	1.76e-13	3.25e-11	3.70787	3.95805	51.2433	8.16e-13	1.46e-10	3.19315	4.65415	36.2021	1.78e-09	3.7e-07
3:1:74016283	Hyper	3H	74016283	1	-1.91322	4.28146	25.3883	4.69e-07	4.4e-05	-2.3259	4.00522	33.6204	6.7e-09	7.92e-07	-1.94581	4.94257	19.9373	8e-06	0.000928431
3:1:89580474	Hypo	3H	89580474	1	2.05999	4.08873	21.9199	2.84e-06	0.000229762	1.92253	3.83072	16.7518	4.26e-05	0.00192151	1.87598	4.67031	15.2696	9.32e-05	0.00766255
3:1:89874787	Hypo	3H	89874787	1	3.11837	7.08312	192.066	1.13e-43	1.79e-40	3.09446	6.85933	189.394	4.31e-43	7.99e-40	2.72089	7.07507	99.7261	1.75e-23	1.38e-20
3:1:130766881	Hypo	3H	130766881	1	1.30113	5.74942	32.1728	1.41e-08	1.66e-06	1.21544	5.49007	23.3957	1.32e-06	0.000101488	1.15766	6.04871	15.8713	6.78e-05	0.00581837
3:1:130852233	Hypo	3H	130852233	1	1.11543	5.73084	18.8893	1.39e-05	0.000916624	1.51329	5.76681	39.2517	3.73e-10	5.11e-08	1.45003	6.29971	26.0479	3.33e-07	5.14e-05
3:1:144183510	Hyper	3H	144183510	1	-2.22317	4.00559	25.8302	3.73e-07	3.55e-05	-2.84407	3.72813	38.782	4.74e-10	6.43e-08	-2.61629	4.69305	25.6208	4.16e-07	6.26e-05
3:1:157366275	Hyper	3H	157366275	1	-3.1505	4.66596	83.2557	7.21e-20	2.27e-17	-3.007	4.46852	80.4111	3.04e-19	9.43e-17	-4.14147	5.26648	74.9753	4.77e-18	2.39e-15
3:1:166775124	Hypo	3H	166775124	1	2.44383	4.3109	34.9829	3.33e-09	4.21e-07	2.31144	4.05053	27.7396	1.39e-07	1.3e-05	1.93221	4.72276	17.1784	3.4e-05	0.00329242
3:1:229029512	Hypo	3H	229029512	1	1.79058	4.81785	31.483	2.01e-08	2.3e-06	2.08653	4.78172	43.4009	4.46e-11	6.74e-09	1.65739	5.24437	20.0775	7.44e-06	0.000871746
3:1:256189695	Hypo	3H	256189695	1	1.44264	7.69631	30.5659	3.23e-08	3.58e-06	1.49417	7.51933	35.729	2.27e-09	2.82e-07	1.09141	7.76888	19.1921	1.18e-05	0.00131175
3:1:257793581	Hypo	3H	257793581	1	1.64239	4.57714	25.1596	5.28e-07	4.89e-05	1.45147	4.28159	16.7617	4.24e-05	0.0019142	1.62862	5.09006	17.4506	2.95e-05	0.00290552
3:1:270300130	Hyper	3H	270300130	1	-3.14152	5.36137	126.441	2.46e-29	1.56e-26	-2.65381	5.19432	94.5883	2.34e-22	1.03e-19	-3.2396	5.91411	81.2413	2e-19	1.16e-16
3:2:272397308	Hypo	3H	272397308	2	4.45203	5.86715	134.335	4.62e-31	3.44e-28	4.48404	5.66175	128.116	1.06e-29	7.89e-27	3.84829	5.80969	100.131	1.43e-23	1.16e-20
3:1:272752771	Hypo	3H	272752771	1	2.49002	5.01184	60.2047	8.55e-15	1.81e-12	2.40216	4.75154	52.2114	4.98e-13	9.28e-11	2.37445	5.39655	41.4677	1.2e-10	2.89e-08
3:2:275135155	Hypo	3H	275135155	2	2.31105	5.27708	45.4055	1.6e-11	2.54e-09	2.26278	5.02292	52.2392	4.91e-13	9.18e-11	1.78034	5.39006	24.8982	6.04e-07	8.92e-05
3:1:282775690	Hypo	3H	282775690	1	1.46022	4.24971	14.4156	0.000146582	0.00632299	1.72673	4.15553	19.4071	1.06e-05	0.000614031	1.75033	4.93503	17.2501	3.28e-05	0.00318779
3:1:287169865	Hypo	3H	287169865	1	1.82496	4.10645	18.9338	1.35e-05	0.000897931	1.71275	3.85889	15.7951	7.06e-05	0.00282641	1.80137	4.72926	14.9249	0.000111875	0.00884476
3:1:287240254	Hypo	3H	287240254	1	3.31012	4.84216	86.2386	1.59e-20	5.29e-18	3.0957	4.5033	67.3003	2.33e-16	5.71e-14	2.75956	5.0571	41.1926	1.38e-10	3.27e-08
3:1:289418361	Hyper	3H	289418361	1	-1.44361	7.22591	59.9898	9.54e-15	2.01e-12	-1.5153	7.00088	57.5888	3.23e-14	6.58e-12	-1.88675	7.53394	55.9447	7.45e-14	2.47e-11
3:1:365398683	Hypo	3H	365398683	1	5.8903	5.23023	172.745	1.86e-39	2.47e-36	6.06251	5.15	187.519	1.11e-42	2e-39	5.32357	5.49289	121.363	3.18e-28	4.06e-25
3:1:372350398	Hyper	3H	372350398	1	-5.44135	4.39412	136.515	1.54e-31	1.17e-28	-5.45043	4.18322	133.124	8.49e-31	6.75e-28	-4.894	5.10356	81.0389	2.21e-19	1.26e-16
3:1:375641153	Hypo	3H	375641153	1	1.60434	4.20218	15.784	7.1e-05	0.00355901	1.73264	4.04753	18.2425	1.94e-05	0.00102366	1.76904	4.85095	15.9636	6.46e-05	0.00556473
3:1:380856331	Hypo	3H	380856331	1	3.22749	4.23525	47.1641	6.53e-12	1.07e-09	2.58632	3.75713	25.8993	3.6e-07	3.1e-05	2.63547	4.65318	27.4223	1.64e-07	2.62e-05
3:1:388409631	Hypo	3H	388409631	1	3.27681	4.99936	86.9283	1.13e-20	3.75e-18	3.03706	4.65259	67.2934	2.34e-16	5.71e-14	2.65274	5.15797	40.7022	1.77e-10	4.15e-08
3:2:396833143	Hyper	3H	396833143	2	-2.92098	4.0544	42.9929	5.49e-11	8.2e-09	-3.02745	3.83749	43.2	4.94e-11	7.38e-09	-2.6279	4.81143	27.2999	1.74e-07	2.78e-05
3:1:398718873	Hyper	3H	398718873	1	-2.99995	3.90589	43.6661	3.89e-11	5.9e-09	-2.87279	3.71	39.0299	4.17e-10	5.68e-08	-2.391	4.69309	22.0267	2.69e-06	0.000351977
3:1:398718899	Hyper	3H	398718899	1	-2.84315	3.94305	42.0692	8.81e-11	1.29e-08	-3.29193	3.71376	49.1988	2.31e-12	3.97e-10	-2.61664	4.713	25.5204	4.38e-07	6.57e-05
3:1:399225566	Hypo	3H	399225566	1	1.56966	4.81867	23.9009	1.01e-06	9.01e-05	1.64329	4.65014	28.1676	1.11e-07	1.06e-05	1.5876	5.30807	19.5138	9.99e-06	0.00113903
3:1:401427915	Hypo	3H	401427915	1	1.69651	4.77375	28.4373	9.68e-08	1.01e-05	2.06896	4.7802	43.115	5.16e-11	7.67e-09	1.68548	5.27191	21.0194	4.55e-06	0.000565453
3:1:401977153	Hypo	3H	401977153	1	1.90852	4.56562	29.0247	7.15e-08	7.55e-06	2.2183	4.53067	38.3026	6.06e-10	8.08e-08	1.66836	5.00158	16.6843	4.41e-05	0.00405178
3:1:402209295	Hypo	3H	402209295	1	4.33491	6.43735	237.171	1.63e-53	3.96e-50	4.39383	6.28698	235.422	3.92e-53	9.44e-50	4.03772	6.54905	150.511	1.34e-34	2.4e-31
3:2:403585067	Hypo	3H	403585067	2	2.08083	4.08325	23.3146	1.38e-06	0.000118526	2.04915	3.86629	21.4705	3.59e-06	0.000246826	1.86885	4.66276	15.1432	9.97e-05	0.00808123
3:1:403702960	Hypo	3H	403702960	1	2.8988	4.4531	50.1353	1.44e-12	2.46e-10	2.71577	4.15506	40.5291	1.94e-10	2.71e-08	2.46313	4.83794	28.4536	9.6e-08	1.61e-05
3:1:405737046	Hyper	3H	405737046	1	-1.55248	5.17314	36.6868	1.39e-09	1.79e-07	-1.67696	4.94992	39.82	2.78e-10	3.86e-08	-1.57957	5.71381	23.3054	1.38e-06	0.000191928
3:1:407312819	Hyper	3H	407312819	1	-5.13179	4.22257	115.137	7.35e-27	3.82e-24	-4.33706	4.03012	91.6321	1.04e-21	4.31e-19	-4.5847	4.95601	68.0868	1.56e-16	6.35e-14
3:1:407446207	Hyper	3H	407446207	1	-1.681	4.7043	27.3276	1.72e-07	1.72e-05	-1.2498	4.57494	16.0892	6.04e-05	0.00252271	-2.74894	5.21902	42.389	7.48e-11	1.84e-08
3:2:407687842	Hyper	3H	407687842	2	-5.62742	5.43609	251.899	1e-56	2.92e-53	-5.40297	5.22516	238.849	7.01e-54	1.81e-50	-5.59183	6.0028	151.827	6.91e-35	1.32e-31
3:1:419524396	Hyper	3H	419524396	1	-1.78446	5.36997	52.3548	4.63e-13	8.33e-11	-1.58096	5.20358	38.2326	6.28e-10	8.36e-08	-1.79223	5.90089	31.8272	1.69e-08	3.1e-06
3:1:422535932	Hypo	3H	422535932	1	5.68061	7.60424	443.231	2.14e-98	2.61e-94	5.81124	7.52602	453.717	1.12e-100	1.62e-96	5.37437	7.65046	282.99	1.67e-63	2.24e-59
3:1:430249466	Hypo	3H	430249466	1	1.94109	6.79398	98.2036	3.77e-23	1.52e-20	1.74238	6.45521	69.6135	7.21e-17	1.86e-14	1.50112	6.82765	32.8164	1.01e-08	1.91e-06
3:1:433558769	Hypo	3H	433558769	1	3.00545	4.98997	66.1916	4.09e-16	9.66e-14	2.54551	4.501	49.1556	2.36e-12	4.04e-10	2.39894	5.14783	34.6693	3.91e-09	7.79e-07
3:2:435857387	Hyper	3H	435857387	2	-2.43155	5.13824	61.376	4.72e-15	1.03e-12	-2.8106	4.85985	79.8293	4.08e-19	1.26e-16	-2.25175	5.6986	42.772	6.15e-11	1.53e-08
3:1:437945609	Hypo	3H	437945609	1	1.47087	6.59289	53.1687	3.06e-13	5.58e-11	1.38303	6.33516	42.1671	8.38e-11	1.22e-08	1.1016	6.70955	17.8803	2.35e-05	0.00239726
3:1:445246141	Hypo	3H	445246141	1	2.5383	4.59181	37.4395	9.43e-10	1.23e-07	2.22257	4.21874	28.2556	1.06e-07	1.02e-05	1.87607	4.85711	17.2872	3.21e-05	0.00313174
3:1:445252720	Hypo	3H	445252720	1	2.68669	6.66996	151.664	7.5e-35	7.02e-32	2.46723	6.3021	113.854	1.4e-26	8.52e-24	2.29441	6.70985	68.4196	1.32e-16	5.41e-14
3:1:454334863	Hyper	3H	454334863	1	-0.663545	7.60967	15.0802	0.000103038	0.00483299	-0.900241	7.33031	23.8455	1.04e-06	8.17e-05	-1.04432	7.86366	19.1673	1.2e-05	0.00132618
3:1:455278856	Hypo	3H	455278856	1	3.05354	4.55584	56.3136	6.18e-14	1.19e-11	3.18451	4.42721	56.1689	6.65e-14	1.33e-11	2.42848	4.84749	27.4285	1.63e-07	2.62e-05
3:1:477270051	Hyper	3H	477270051	1	-1.66446	4.73756	24.3395	8.08e-07	7.28e-05	-1.2457	4.62455	15.1972	9.68e-05	0.00354901	-1.9722	5.30764	26.5703	2.54e-07	3.97e-05
3:1:477564271	Hypo	3H	477564271	1	3.20862	4.42484	52.3287	4.69e-13	8.42e-11	3.07444	4.14775	45.8321	1.29e-11	2.09e-09	2.94059	4.87519	38.7072	4.92e-10	1.1e-07
3:2:483354993	Hyper	3H	483354993	2	-1.8081	3.94779	19.3274	1.1e-05	0.000753879	-1.48846	3.78733	13.1203	0.000292116	0.00784909	-1.97078	4.66418	16.0489	6.17e-05	0.00536267
3:1:487397751	Hypo	3H	487397751	1	2.21051	5.0035	47.3328	5.99e-12	9.85e-10	2.01223	4.68179	37.3543	9.85e-10	1.29e-07	2.02233	5.35894	30.5196	3.31e-08	5.92e-06
3:1:490855740	Hyper	3H	490855740	1	-0.60358	9.09132	13.5598	0.000231086	0.00888923	-0.793166	8.81481	21.3246	3.88e-06	0.000261862	-1.1084	9.2575	24.8043	6.35e-07	9.27e-05
3:1:511152111	Hyper	3H	511152111	1	-5.80521	4.84222	201.068	1.22e-45	2.03e-42	-6.14457	4.62803	202.338	6.45e-46	1.26e-42	-4.82215	5.49676	101.882	5.89e-24	5.18e-21
3:1:511303543	Hypo	3H	511303543	1	2.38743	4.83191	49.9828	1.55e-12	2.65e-10	2.62028	4.76655	62.6354	2.49e-15	5.6e-13	2.34363	5.28622	37.5239	9.03e-10	1.97e-07
3:1:511317217	Hyper	3H	511317217	1	-0.719273	8.38505	18.3428	1.85e-05	0.00116698	-0.875774	8.13082	22.7857	1.81e-06	0.000135488	-1.19921	8.58907	26.8574	2.19e-07	3.46e-05
3:1:511769068	Hyper	3H	511769068	1	-1.6671	6.47878	62.8839	2.19e-15	4.97e-13	-1.639	6.27606	58.5039	2.03e-14	4.19e-12	-1.81966	6.88368	46.05	1.15e-11	3.03e-09
3:1:516329156	Hypo	3H	516329156	1	3.12493	5.44109	109.202	1.47e-25	6.99e-23	2.85575	5.05459	83.18	7.49e-20	2.47e-17	2.39182	5.42026	42.552	6.88e-11	1.71e-08
3:1:527987049	Hypo	3H	527987049	1	2.09319	7.58954	123.546	1.06e-28	6.28e-26	1.84742	7.20207	85.479	2.34e-20	8.22e-18	1.5072	7.48212	37.2603	1.03e-09	2.24e-07
3:1:536589752	Hypo	3H	536589752	1	2.43408	6.82227	113.911	1.36e-26	6.91e-24	2.30839	6.52367	113.326	1.83e-26	1.08e-23	1.90761	6.76353	49.5059	1.98e-12	5.67e-10
3:2:543126384	Hyper	3H	543126384	2	-5.63769	4.50865	163.464	1.98e-37	2.16e-34	-5.64448	4.29644	157.161	4.72e-36	5.33e-33	-5.08523	5.20249	90.8588	1.54e-21	1.06e-18
3:1:550315478	Hypo	3H	550315478	1	4.31508	4.82024	103.49	2.62e-24	1.16e-21	4.12736	4.49478	89.9794	2.41e-21	9.4e-19	3.86848	5.12565	68.4591	1.3e-16	5.38e-14
3:1:553793919	Hyper	3H	553793919	1	-4.78466	6.5201	274.586	1.14e-61	3.95e-58	-4.67346	6.31585	259.398	2.32e-58	6.99e-55	-5.10426	6.98525	203.515	3.57e-46	1.13e-42
3:1:557288818	Hypo	3H	557288818	1	3.80112	4.53592	71.2289	3.18e-17	8.26e-15	4.13617	4.52751	88.108	6.2e-21	2.33e-18	3.6595	5.04821	59.3104	1.35e-14	4.78e-12
4:1:6744328	Hyper	4H	6744328	1	-4.88081	7.72468	429.018	2.66e-95	2.77e-91	-5.00994	7.50737	461.263	2.55e-102	4.61e-98	-5.2702	8.12512	283.629	1.22e-63	2.17e-59
4:2:22396433	Hypo	4H	22396433	2	2.64139	4.4044	44.0657	3.18e-11	4.86e-09	2.55451	4.16601	36.9896	1.19e-09	1.54e-07	2.11567	4.78776	21.0002	4.59e-06	0.000568496
4:1:23432424	Hyper	4H	23432424	1	-2.54117	4.36944	44.5034	2.54e-11	3.94e-09	-2.53867	4.15776	43.9828	3.31e-11	5.05e-09	-3.34348	5.00677	46.0743	1.14e-11	3.01e-09
4:1:31393412	Hyper	4H	31393412	1	-1.29871	5.4713	27.3208	1.72e-07	1.72e-05	-1.23327	5.27696	23.0176	1.61e-06	0.000121387	-2.12471	5.84017	41.3734	1.26e-10	3.01e-08
4:1:33589121	Hyper	4H	33589121	1	-1.82504	4.36138	27.0655	1.97e-07	1.95e-05	-2.53846	4.07289	43.0425	5.36e-11	7.95e-09	-2.88041	4.95138	36.872	1.26e-09	2.66e-07
4:1:43611088	Hypo	4H	43611088	1	2.97318	4.71899	68.8362	1.07e-16	2.68e-14	2.74577	4.38811	50.3639	1.28e-12	2.26e-10	2.52225	5.02303	34.4516	4.37e-09	8.68e-07
4:1:45415802	Hypo	4H	45415802	1	4.96992	4.8883	118.872	1.12e-27	6.13e-25	4.84764	4.59677	113.658	1.55e-26	9.24e-24	4.36036	5.14001	79.2876	5.37e-19	3e-16
4:1:71232873	Hyper	4H	71232873	1	-1.22681	5.21867	21.0226	4.54e-06	0.000352415	-1.31909	4.98386	25.1256	5.37e-07	4.49e-05	-1.99938	5.62431	33.7604	6.23e-09	1.22e-06
4:1:71328326	Hypo	4H	71328326	1	3.82269	4.22591	57.787	2.92e-14	5.82e-12	3.91693	4.06085	59.6212	1.15e-14	2.42e-12	3.32918	4.7013	39.5373	3.22e-10	7.37e-08
4:1:147537592	Hyper	4H	147537592	1	-3.22989	3.97842	49.1781	2.34e-12	3.96e-10	-4.1934	3.73617	66.2524	3.97e-16	9.52e-14	-2.75389	4.75065	28.2885	1.05e-07	1.73e-05
4:1:150804320	Hyper	4H	150804320	1	-0.835543	5.86007	15.3215	9.07e-05	0.00436265	-0.782374	5.68158	12.7996	0.000346688	0.00876311	-1.37589	6.19238	22.8165	1.78e-06	0.000242469
4:1:153704536	Hypo	4H	153704536	1	2.32537	6.17198	106.551	5.58e-25	2.6e-22	2.15094	5.84699	80.0584	3.64e-19	1.12e-16	1.93315	6.25938	44.0742	3.16e-11	8.07e-09
4:1:163798250	Hypo	4H	163798250	1	3.10085	5.01689	73.788	8.7e-18	2.37e-15	3.27401	4.92797	83.981	5e-20	1.69e-17	2.69681	5.25841	45.586	1.46e-11	3.8e-09
4:1:204265909	Hyper	4H	204265909	1	-1.63279	4.3939	21.7854	3.05e-06	0.000245622	-1.19122	4.26919	12.9762	0.000315484	0.00823233	-1.76126	5.0272	17.926	2.3e-05	0.0023538
4:1:216231271	Hypo	4H	216231271	1	5.61804	5.04564	156.257	7.44e-36	7.34e-33	5.59568	4.82664	140.949	1.65e-32	1.51e-29	4.76701	5.18443	90.1249	2.24e-21	1.5e-18
4:1:216565048	Hypo	4H	216565048	1	4.3352	4.83865	110.434	7.87e-26	3.8e-23	4.61283	4.82297	117.653	2.07e-27	1.3e-24	4.44824	5.44614	99.9973	1.53e-23	1.22e-20
4:1:225097053	Hypo	4H	225097053	1	4.70623	5.09692	133.877	5.81e-31	4.24e-28	4.15304	4.52649	94.3934	2.59e-22	1.13e-19	3.80815	5.11124	66.2566	3.96e-16	1.56e-13
4:1:229578196	Hypo	4H	229578196	1	5.33694	8.61392	513.834	9.29e-114	3.39e-109	5.38741	8.45974	528.546	5.85e-117	2.11e-112	5.0505	8.63945	319.535	1.83e-71	4.9e-67
4:1:248245050	Hypo	4H	248245050	1	4.10084	5.80759	149.246	2.53e-34	2.26e-31	3.95129	5.48234	134.078	5.25e-31	4.26e-28	3.07471	5.5001	63.5006	1.6e-15	6.09e-13
4:1:261781498	Hypo	4H	261781498	1	3.76411	4.37885	58.0484	2.56e-14	5.14e-12	3.99216	4.30058	66.1146	4.25e-16	1.01e-13	3.62993	4.93722	53.9901	2.01e-13	6.32e-11
4:1:271167001	Hypo	4H	271167001	1	3.13752	4.60469	62.0703	3.31e-15	7.33e-13	3.24333	4.47284	58.5278	2e-14	4.15e-12	2.16165	4.76062	20.653	5.51e-06	0.000672181
4:1:273386652	Hyper	4H	273386652	1	-1.01094	5.33095	16.4297	5.05e-05	0.00269358	-0.929488	5.13411	12.483	0.000410666	0.00985552	-1.64315	5.72266	24.8794	6.1e-07	8.96e-05
4:1:275862363	Hypo	4H	275862363	1	4.70812	4.7117	106.774	4.99e-25	2.33e-22	4.48037	4.37401	83.1337	7.67e-20	2.51e-17	4.09292	5.00934	66.9369	2.8e-16	1.12e-13
4:1:282134265	Hyper	4H	282134265	1	-1.80771	3.95025	18.3725	1.82e-05	0.0011539	-2.2702	3.69102	25.8227	3.74e-07	3.21e-05	-2.44498	4.63935	22.2639	2.38e-06	0.00031607
4:1:282792370	Hyper	4H	282792370	1	-3.72903	4.11817	78.0192	1.02e-18	3.04e-16	-4.5413	3.88748	91.1456	1.33e-21	5.39e-19	-4.31412	4.84035	58.5995	1.93e-14	6.73e-12
4:1:284047531	Hypo	4H	284047531	1	2.38637	4.13354	26.5964	2.51e-07	2.44e-05	2.6356	4.02833	36.3393	1.66e-09	2.1e-07	2.09031	4.66339	18.7501	1.49e-05	0.00161036
4:1:285147731	Hyper	4H	285147731	1	-1.99277	5.03383	45.798	1.31e-11	2.09e-09	-1.4355	4.92139	26.7977	2.26e-07	2.04e-05	-2.21913	5.56729	37.9202	7.37e-10	1.63e-07
4:1:288980319	Hypo	4H	288980319	1	2.61165	6.97214	130.625	2.99e-30	2.04e-27	2.63986	6.79179	134.216	4.9e-31	4.02e-28	2.28853	7.03706	73.6596	9.28e-18	4.44e-15
4:1:289139295	Hypo	4H	289139295	1	4.92159	5.25758	146.593	9.63e-34	8.17e-31	4.87344	5.02684	134.25	4.82e-31	4e-28	4.61457	5.56605	110.878	6.29e-26	7.03e-23
4:1:289531496	Hyper	4H	289531496	1	-3.03533	4.14675	56.1195	6.82e-14	1.31e-11	-2.33096	3.97316	37.162	1.09e-09	1.41e-07	-2.82965	4.8727	33.2619	8.05e-09	1.54e-06
4:1:290685759	Hypo	4H	290685759	1	2.5111	4.64938	47.3878	5.82e-12	9.6e-10	2.7556	4.58358	57.4077	3.54e-14	7.17e-12	1.95959	4.93422	21.1731	4.2e-06	0.000526754
4:2:293409722	Hypo	4H	293409722	2	2.70919	4.59502	45.818	1.3e-11	2.08e-09	2.40648	4.21804	36.9184	1.23e-09	1.59e-07	2.10833	4.86954	22.5913	2e-06	0.000270564
4:1:294835118	Hyper	4H	294835118	1	-1.53223	4.18583	19.6279	9.41e-06	0.000662316	-1.45007	3.99114	16.7135	4.35e-05	0.00195366	-2.15889	4.82628	21.007	4.58e-06	0.000567793
4:1:297853809	Hypo	4H	297853809	1	2.56679	8.28125	205.421	1.37e-46	2.38e-43	2.35603	7.91126	157.91	3.24e-36	3.84e-33	2.05209	8.1732	73.5466	9.83e-18	4.66e-15
4:1:298201144	Hyper	4H	298201144	1	-1.36695	6.63377	44.6511	2.35e-11	3.67e-09	-1.54039	6.38683	52.9949	3.34e-13	6.33e-11	-1.6381	6.99299	38.5366	5.37e-10	1.2e-07
4:2:299597720	Hypo	4H	299597720	2	3.67852	4.47509	64.4657	9.82e-16	2.28e-13	3.24894	4.05167	44.5287	2.51e-11	3.9e-09	2.82771	4.72601	31.6725	1.82e-08	3.34e-06
4:1:301021875	Hyper	4H	301021875	1	-1.01718	6.31982	22.2437	2.4e-06	0.000197149	-1.09884	6.08455	24.1875	8.74e-07	6.99e-05	-1.36952	6.66747	25.5113	4.4e-07	6.59e-05
4:2:301672665	Hyper	4H	301672665	2	-5.22358	4.27015	127.116	1.75e-29	1.14e-26	-4.90796	4.06759	112.662	2.56e-26	1.47e-23	-4.67093	4.99529	71.9656	2.19e-17	9.95e-15
4:1:302334640	Hyper	4H	302334640	1	-2.1153	4.30535	35.4864	2.57e-09	3.27e-07	-3.10621	4.0101	57.919	2.73e-14	5.59e-12	-2.30589	4.96657	26.7229	2.35e-07	3.69e-05
4:1:302398838	Hypo	4H	302398838	1	1.51894	5.48227	39.4561	3.36e-10	4.59e-08	1.53845	5.30652	31.99	1.55e-08	1.73e-06	1.27945	5.78481	16.9714	3.79e-05	0.00359366
4:1:302427241	Hyper	4H	302427241	1	-1.59426	7.04677	74.5953	5.78e-18	1.61e-15	-1.62866	6.83139	68.4276	1.32e-16	3.27e-14	-2.05825	7.35918	63.1103	1.95e-15	7.22e-13
4:1:302616665	Hypo	4H	302616665	1	1.53176	4.27409	15.949	6.51e-05	0.00332816	1.7374	4.15938	19.5596	9.75e-06	0.000573842	1.65224	4.89747	15.0833	0.00010287	0.00829179
4:1:308375867	Hyper	4H	308375867	1	-2.74594	4.11688	41.9575	9.33e-11	1.36e-08	-2.3163	3.94317	31.8146	1.7e-08	1.87e-06	-2.44432	4.8486	26.0756	3.28e-07	5.09e-05
4:1:308721353	Hypo	4H	308721353	1	4.50247	6.86965	307.517	7.59e-69	3.08e-65	4.52781	6.69619	273.365	2.1e-61	6.89e-58	4.04525	6.82153	162.938	2.58e-37	5.53e-34
4:1:309054778	Hyper	4H	309054778	1	-3.16363	4.65721	76.724	1.97e-18	5.67e-16	-3.05575	4.44227	73.6318	9.41e-18	2.59e-15	-2.39207	5.32527	38.1049	6.7e-10	1.48e-07
4:1:322319613	Hyper	4H	322319613	1	-2.42825	4.45543	49.049	2.5e-12	4.21e-10	-2.32267	4.25035	47.8189	4.67e-12	7.78e-10	-3.34619	5.0693	50.5171	1.18e-12	3.5e-10
4:1:322417617	Hypo	4H	322417617	1	4.24548	4.80142	97.8859	4.43e-23	1.77e-20	4.55111	4.79061	118.478	1.36e-27	8.64e-25	3.9808	5.20748	74.8375	5.11e-18	2.54e-15
4:1:384608506	Hypo	4H	384608506	1	1.64447	8.11002	37.6624	8.41e-10	1.11e-07	1.7122	7.94998	45.7114	1.37e-11	2.21e-09	1.34029	8.18751	29.8407	4.69e-08	8.14e-06
4:1:404655372	Hyper	4H	404655372	1	-2.23637	5.46272	78.0801	9.89e-19	2.96e-16	-2.03825	5.27738	68.5584	1.23e-16	3.07e-14	-2.40567	5.97623	54.2883	1.73e-13	5.46e-11
4:1:406477706	Hyper	4H	406477706	1	-1.84824	4.2862	26.4406	2.72e-07	2.63e-05	-1.93689	4.06091	28.259	1.06e-07	1.02e-05	-1.82554	4.96315	17.9674	2.25e-05	0.00231201
4:1:434265530	Hyper	4H	434265530	1	-1.69153	4.22291	22.1132	2.57e-06	0.000210074	-1.71495	4.00793	21.5459	3.45e-06	0.000238667	-2.75752	4.83342	30.8309	2.82e-08	5.08e-06
4:1:434295469	Hyper	4H	434295469	1	-0.7486	9.5269	20.764	5.2e-06	0.000397028	-0.63615	9.37635	13.7824	0.000205255	0.00613438	-0.903725	9.82198	16.8384	4.07e-05	0.00378104
4:2:448188923	Hyper	4H	448188923	2	-6.06431	5.21815	230.416	4.84e-52	1.14e-48	-6.05291	5.00667	225.756	5.02e-51	1.17e-47	-6.06211	5.80788	148.045	4.64e-34	8.02e-31
4:1:450208174	Hyper	4H	450208174	1	-5.88911	4.68032	169.493	9.55e-39	1.14e-35	-5.89483	4.46574	166.595	4.1e-38	5.81e-35	-5.33243	5.34229	103.048	3.27e-24	3.08e-21
4:1:458374368	Hypo	4H	458374368	1	1.39406	9.21487	58.5766	1.96e-14	4.01e-12	1.2528	8.91992	47.7381	4.87e-12	8.09e-10	0.941894	9.22604	17.7244	2.55e-05	0.00257267
4:1:469443679	Hypo	4H	469443679	1	2.69931	7.93427	188.174	7.96e-43	1.21e-39	2.48217	7.55321	155.424	1.13e-35	1.24e-32	2.23754	7.86412	82.0871	1.3e-19	7.76e-17
4:1:477535194	Hypo	4H	477535194	1	2.1853	5.36389	59.4937	1.23e-14	2.56e-12	1.97251	5.02294	46.4195	9.55e-12	1.56e-09	1.68967	5.49629	24.4445	7.65e-07	0.0001105
4:1:490100788	Hypo	4H	490100788	1	1.72859	4.01171	15.0496	0.000104723	0.00488798	2.09118	3.94609	18.5358	1.67e-05	0.000898573	1.94214	4.72064	16.9897	3.76e-05	0.00356545
4:1:499057147	Hypo	4H	499057147	1	1.8218	4.65081	26.734	2.33e-07	2.28e-05	1.86927	4.4653	28.5969	8.91e-08	8.72e-06	1.71223	5.11967	18.7312	1.5e-05	0.00162316
4:1:505471759	Hypo	4H	505471759	1	2.19621	5.42832	61.3774	4.71e-15	1.03e-12	2.00277	5.09834	51.6801	6.53e-13	1.19e-10	1.76039	5.59096	27.7105	1.41e-07	2.3e-05
4:1:522740860	Hyper	4H	522740860	1	-1.56451	4.09247	14.9837	0.000108444	0.00501884	-1.51676	3.878	13.8419	0.000198849	0.00600001	-1.8629	4.7646	15.1874	9.74e-05	0.00794251
4:1:525452654	Hypo	4H	525452654	1	1.15803	5.00117	15.4414	8.51e-05	0.00414103	1.30477	4.87345	18.1809	2.01e-05	0.00105122	1.40652	5.58081	17.5615	2.78e-05	0.0027714
5:1:3118072	Hyper	5H	3118072	1	-1.7414	7.35165	83.3673	6.81e-20	2.15e-17	-1.76792	7.14024	84.7363	3.41e-20	1.18e-17	-2.13031	7.67249	70.4908	4.62e-17	1.98e-14
5:2:7846047	Hyper	5H	7846047	2	-2.20067	3.97905	28.0442	1.19e-07	1.21e-05	-2.58436	3.73008	31.8092	1.7e-08	1.87e-06	-2.19318	4.69887	19.3171	1.11e-05	0.00124146
5:1:22840467	Hypo	5H	22840467	1	2.21074	4.31044	30.3678	3.57e-08	3.95e-06	2.42781	4.20833	35.0914	3.15e-09	3.87e-07	1.76582	4.74191	14.6962	0.000126298	0.00981137
5:2:22843184	Hypo	5H	22843184	2	3.2699	4.1321	41.9732	9.25e-11	1.35e-08	3.48632	4.01915	50.3528	1.28e-12	2.26e-10	2.99866	4.69509	33.693	6.45e-09	1.25e-06
5:2:25524906	Hypo	5H	25524906	2	1.84421	4.57894	29.2618	6.32e-08	6.74e-06	1.40952	4.1628	15.0205	0.000106351	0.00379532	1.58072	4.99418	15.3381	8.99e-05	0.00747873
5:1:25543283	Hypo	5H	25543283	1	0.732165	7.67143	13.6735	0.000217501	0.00852987	1.14483	7.72887	33.3036	7.88e-09	9.25e-07	0.965462	8.13577	16.5143	4.83e-05	0.00437922
5:1:33008821	Hypo	5H	33008821	1	2.13168	4.89897	38.7702	4.77e-10	6.41e-08	2.24322	4.75644	45.0221	1.95e-11	3.06e-09	1.63714	5.15411	17.944	2.28e-05	0.00233614
5:1:33024695	Hypo	5H	33024695	1	3.62325	4.30004	55.4979	9.36e-14	1.77e-11	3.08676	3.84079	37.2101	1.06e-09	1.38e-07	3.19878	4.76292	39.2482	3.73e-10	8.44e-08
5:1:33920241	Hypo	5H	33920241	1	2.99234	4.23157	41.7337	1.05e-10	1.52e-08	2.71053	3.89914	30.5731	3.22e-08	3.44e-06	2.25704	4.6086	20.7385	5.26e-06	0.00064575
5:1:34598422	Hypo	5H	34598422	1	4.78451	5.88821	224.351	1.02e-50	2.12e-47	4.48786	5.45425	180.246	4.28e-41	7.55e-38	4.07756	5.78629	110.224	8.75e-26	9.38e-23
5:1:42856557	Hyper	5H	42856557	1	-1.36062	4.42766	15.3821	8.78e-05	0.00425569	-1.32008	4.22297	15.0194	0.000106414	0.0037957	-2.12424	4.98192	23.6656	1.15e-06	0.00016125
5:1:42914871	Hypo	5H	42914871	1	2.88768	5.14762	77.0913	1.63e-18	4.75e-16	2.93564	4.96958	86.1442	1.67e-20	5.93e-18	2.31913	5.284	36.9825	1.19e-09	2.56e-07
5:1:53387723	Hypo	5H	53387723	1	6.04832	7.26851	426.373	1e-94	9.13e-91	6.10231	7.11649	405.042	4.4e-90	3.97e-86	5.61964	7.2478	263.939	2.38e-59	1.96e-55
5:1:53471812	Hyper	5H	53471812	1	-2.5261	4.37167	44.1595	3.03e-11	4.65e-09	-2.48099	4.15686	42.0206	9.03e-11	1.31e-08	-2.22848	5.05328	27.6094	1.48e-07	2.4e-05
5:1:59676324	Hypo	5H	59676324	1	2.89544	4.61427	54.7474	1.37e-13	2.56e-11	2.38074	4.14098	32.4579	1.22e-08	1.39e-06	2.4371	4.93926	30.4642	3.4e-08	6.06e-06
5:1:61026330	Hypo	5H	61026330	1	4.6508	4.68158	100.146	1.42e-23	6.08e-21	4.80462	4.57554	103.339	2.82e-24	1.47e-21	4.29499	5.11137	75.7875	3.16e-18	1.61e-15
5:1:63649413	Hypo	5H	63649413	1	1.84669	4.6643	27.9064	1.27e-07	1.3e-05	2.21541	4.65933	44.4634	2.59e-11	4.02e-09	2.01322	5.24214	27.8473	1.31e-07	2.15e-05
5:1:70313402	Hyper	5H	70313402	1	-5.21699	4.26703	125.02	5.04e-29	3.09e-26	-4.94743	4.05867	112.818	2.37e-26	1.37e-23	-4.67297	4.99632	71.8045	2.38e-17	1.07e-14
5:1:74154381	Hyper	5H	74154381	1	-0.900617	9.96733	22.9567	1.66e-06	0.000140486	-0.923012	9.76537	23.4301	1.3e-06	9.99e-05	-1.12073	10.2468	26.0292	3.36e-07	5.17e-05
5:1:76064381	Hyper	5H	76064381	1	-1.79829	4.3619	23.5046	1.25e-06	0.000108533	-1.73203	4.14879	23.3146	1.38e-06	0.000105216	-1.63605	5.02366	15.8423	6.88e-05	0.00588552
5:2:82157950	Hypo	5H	82157950	2	3.41006	4.96998	91.8563	9.32e-22	3.32e-19	3.29722	4.69256	82.0221	1.35e-19	4.25e-17	3.01622	5.22325	53.5123	2.57e-13	7.92e-11
5:1:92575409	Hypo	5H	92575409	1	1.87734	4.6444	31.6362	1.86e-08	2.14e-06	1.89065	4.44429	30.3659	3.58e-08	3.79e-06	1.70981	5.07788	18.8924	1.38e-05	0.00150984
5:1:93460768	Hypo	5H	93460768	1	2.8582	4.27146	41.0061	1.52e-10	2.16e-08	2.40216	3.86425	25.1479	5.31e-07	4.44e-05	2.3017	4.67994	22.3289	2.3e-06	0.000306354
5:1:94043607	Hypo	5H	94043607	1	4.73104	4.72714	109.344	1.36e-25	6.55e-23	4.69465	4.50033	102.859	3.6e-24	1.86e-21	4.00551	4.97333	63.1691	1.9e-15	7.06e-13
5:1:94432554	Hyper	5H	94432554	1	-1.5488	4.93862	31.7963	1.71e-08	1.98e-06	-1.87201	4.66724	41.1333	1.42e-10	2.01e-08	-1.98373	5.44367	29.7304	4.97e-08	8.59e-06
5:1:96357201	Hyper	5H	96357201	1	-2.44204	9.36297	191.019	1.9e-43	2.96e-40	-2.42885	9.15638	173.537	1.25e-39	2.01e-36	-2.84127	9.66714	141.551	1.22e-32	1.87e-29
5:1:97143083	Hypo	5H	97143083	1	2.3462	5.32367	72.9254	1.35e-17	3.6e-15	1.89397	4.84291	41.5387	1.16e-10	1.65e-08	1.66308	5.38408	22.4107	2.2e-06	0.000295737
5:1:99268632	Hypo	5H	99268632	1	2.45909	4.95918	61.293	4.92e-15	1.07e-12	1.91882	4.4542	30.1928	3.91e-08	4.11e-06	2.01488	5.20769	27.8565	1.31e-07	2.15e-05
5:1:99612253	Hyper	5H	99612253	1	-2.66744	6.68587	170.234	6.58e-39	8.13e-36	-2.77372	6.45584	157.304	4.39e-36	5.11e-33	-2.72309	7.11005	95.821	1.26e-22	9.23e-20
5:1:100591976	Hypo	5H	100591976	1	2.10699	4.95674	42.6609	6.51e-11	9.62e-09	1.76341	4.55781	28.4103	9.81e-08	9.53e-06	1.45884	5.12713	14.6585	0.000128849	0.00996619
5:1:100709334	Hypo	5H	100709334	1	3.21477	4.53961	58.2647	2.29e-14	4.66e-12	3.49199	4.48854	73.3598	1.08e-17	2.96e-15	3.03135	5.00127	44.5738	2.45e-11	6.28e-09
5:1:100825341	Hypo	5H	100825341	1	2.48101	5.48797	72.1293	2.02e-17	5.33e-15	2.67825	5.41609	86.2572	1.58e-20	5.62e-18	2.13554	5.67909	40.4757	1.99e-10	4.62e-08
5:2:101076435	Hyper	5H	101076435	2	-3.5297	5.66345	129.512	5.24e-30	3.51e-27	-3.40985	5.4455	132.388	1.23e-30	9.56e-28	-3.28175	6.19295	94.1481	2.93e-22	2.09e-19
5:1:101100935	Hypo	5H	101100935	1	2.35855	4.86512	50.4106	1.25e-12	2.16e-10	2.47321	4.72989	53.659	2.38e-13	4.63e-11	1.94919	5.15404	24.7249	6.61e-07	9.61e-05
5:1:101159051	Hypo	5H	101159051	1	1.14871	5.0532	17.0516	3.64e-05	0.00205969	1.52992	5.0622	28.2808	1.05e-07	1.01e-05	1.63086	5.74495	25.8465	3.7e-07	5.65e-05
5:1:104772139	Hypo	5H	104772139	1	3.65239	4.57941	67.0136	2.7e-16	6.47e-14	3.66716	4.38035	68.6018	1.2e-16	3.01e-14	2.95859	4.83577	37.678	8.34e-10	1.83e-07
5:1:112270521	Hypo	5H	112270521	1	4.09638	4.69873	91.2838	1.24e-21	4.37e-19	3.89807	4.3731	78.9322	6.43e-19	1.94e-16	3.39807	4.92719	49.2689	2.23e-12	6.36e-10
5:1:118386164	Hyper	5H	118386164	1	-1.17754	5.11017	19.3474	1.09e-05	0.00074747	-1.04512	4.94152	16.1255	5.93e-05	0.00248346	-1.25727	5.64167	14.9721	0.000109115	0.00865202
5:1:128354648	Hypo	5H	128354648	1	2.37883	4.35283	33.6779	6.5e-09	7.98e-07	2.10347	4.01799	25.0042	5.72e-07	4.76e-05	2.08643	4.81981	20.5139	5.92e-06	0.000714698
5:1:129256986	Hyper	5H	129256986	1	-2.12282	6.60194	102.639	4.02e-24	1.77e-21	-2.19021	6.3727	100.876	9.79e-24	4.78e-21	-2.24858	7.0109	68.0163	1.62e-16	6.54e-14
5:1:131494265	Hyper	5H	131494265	1	-0.965557	5.53461	18.1621	2.03e-05	0.00126335	-1.07168	5.29393	21.3878	3.75e-06	0.000256245	-1.29447	5.94534	18.3759	1.81e-05	0.00191719
5:1:185953727	Hypo	5H	185953727	1	1.62721	4.2391	17.0434	3.65e-05	0.00206544	2.05079	4.22298	28.625	8.78e-08	8.64e-06	1.8256	4.9027	17.9861	2.23e-05	0.00230706
5:1:186296103	Hypo	5H	186296103	1	2.36454	4.81807	45.8965	1.25e-11	2e-09	2.76656	4.86115	69.1628	9.07e-17	2.31e-14	2.15751	5.19973	30.5033	3.33e-08	5.96e-06
5:1:215214777	Hypo	5H	215214777	1	2.02969	8.63547	129.533	5.18e-30	3.5e-27	1.8349	8.28154	101.482	7.21e-24	3.55e-21	1.57885	8.60016	47.0543	6.9e-12	1.89e-09
5:1:264007184	Hypo	5H	264007184	1	4.76111	4.94617	124.355	7.04e-29	4.28e-26	4.45559	4.5429	100.701	1.07e-23	5.19e-21	4.04434	5.10499	71.2687	3.12e-17	1.36e-14
5:1:264025929	Hypo	5H	264025929	1	2.55624	4.35946	39.0784	4.07e-10	5.51e-08	2.45389	4.10588	32.306	1.32e-08	1.49e-06	1.97661	4.72997	17.6773	2.62e-05	0.00262721
5:1:271955000	Hypo	5H	271955000	1	1.72957	4.80519	25.2631	5e-07	4.67e-05	2.27217	4.91263	52.908	3.5e-13	6.6e-11	1.4659	5.17396	15.3536	8.92e-05	0.0074318
5:1:286430081	Hypo	5H	286430081	1	7.13209	5.76295	251.151	1.46e-56	4.09e-53	7.19522	5.60676	246.619	1.42e-55	3.94e-52	6.41919	5.96891	184.048	6.33e-42	1.79e-38
5:1:299699195	Hypo	5H	299699195	1	5.67849	5.07816	161.019	6.78e-37	7.17e-34	5.20725	4.56552	107.91	2.81e-25	1.52e-22	4.98495	5.29078	102.91	3.51e-24	3.24e-21
5:1:300727841	Hypo	5H	300727841	1	2.17431	4.13501	24.8442	6.22e-07	5.68e-05	1.93759	3.82571	17.0752	3.59e-05	0.00166649	2.08305	4.72295	19.1298	1.22e-05	0.00134949
5:2:301459794	Hypo	5H	301459794	2	3.1281	4.57721	64.2361	1.1e-15	2.55e-13	2.94413	4.27298	51.4722	7.26e-13	1.32e-10	2.58405	4.88407	32.062	1.49e-08	2.76e-06
5:1:326748515	Hypo	5H	326748515	1	2.0065	7.55373	121.375	3.16e-28	1.78e-25	1.82489	7.22701	86.7599	1.23e-20	4.41e-18	1.5367	7.54093	39.3684	3.51e-10	7.97e-08
5:1:341804544	Hyper	5H	341804544	1	-5.62345	4.50023	160.865	7.32e-37	7.64e-34	-5.6344	4.29081	154.366	1.93e-35	2.05e-32	-5.07315	5.19616	90.171	2.18e-21	1.48e-18
5:2:350218845	Hypo	5H	350218845	2	5.13495	4.39931	87.985	6.6e-21	2.22e-18	4.81802	4.02285	70.5324	4.53e-17	1.19e-14	4.43977	4.83659	65.5885	5.56e-16	2.16e-13
5:1:359853350	Hypo	5H	359853350	1	2.89152	4.45442	54.7835	1.35e-13	2.53e-11	2.68707	4.14226	38.9375	4.38e-10	5.94e-08	2.24036	4.76411	22.9553	1.66e-06	0.000226155
5:1:363990448	Hypo	5H	363990448	1	5.49226	6.14572	267.598	3.79e-60	1.2e-56	5.57517	6.01004	285.542	4.65e-64	1.77e-60	5.16361	6.31301	179.016	7.95e-41	2.13e-37
5:1:364047951	Hypo	5H	364047951	1	3.3854	5.83808	153.56	2.89e-35	2.81e-32	2.91362	5.29963	99.6746	1.8e-23	8.6e-21	2.61483	5.71402	57.4078	3.54e-14	1.22e-11
5:1:364058741	Hypo	5H	364058741	1	1.93726	4.19658	22.3609	2.26e-06	0.000186322	2.13102	4.07771	28.2019	1.09e-07	1.04e-05	2.00723	4.82474	19.7982	8.61e-06	0.0009921
5:1:370504472	Hypo	5H	370504472	1	1.89329	5.65284	58.7193	1.82e-14	3.74e-12	1.93128	5.47819	54.0601	1.94e-13	3.8e-11	1.68504	5.919	30.0489	4.21e-08	7.36e-06
5:1:386861414	Hypo	5H	386861414	1	4.66371	6.22478	243.742	6.01e-55	1.57e-51	4.70893	6.06513	239.718	4.53e-54	1.21e-50	4.32846	6.34266	151.141	9.76e-35	1.8e-31
5:2:390391523	Hyper	5H	390391523	2	-3.5455	6.19723	227.837	1.77e-51	3.91e-48	-3.10807	6.02006	178.065	1.28e-40	2.21e-37	-3.37077	6.67855	117.877	1.85e-27	2.25e-24
5:1:400051090	Hypo	5H	400051090	1	1.93917	5.15872	42.8208	6e-11	8.92e-09	1.81194	4.88188	35.0903	3.15e-09	3.87e-07	1.46677	5.36579	17.5066	2.86e-05	0.00283158
5:1:422295854	Hypo	5H	422295854	1	2.02923	6.81695	99.2933	2.18e-23	8.93e-21	2.11494	6.68529	98.379	3.46e-23	1.61e-20	1.76292	6.95872	46.0065	1.18e-11	3.08e-09
5:1:446015566	Hyper	5H	446015566	1	-1.83634	4.63311	34.7459	3.76e-09	4.75e-07	-1.2134	4.52527	16.6511	4.49e-05	0.0020028	-1.69223	5.25563	20.1519	7.15e-06	0.000842682
5:1:446118363	Hypo	5H	446118363	1	5.15025	5.41158	167.044	3.27e-38	3.79e-35	5.22758	5.26397	168.101	1.92e-38	3.02e-35	4.60986	5.54719	110.81	6.51e-26	7.12e-23
5:1:446269643	Hypo	5H	446269643	1	3.82531	4.6912	80.5186	2.88e-19	8.72e-17	3.95136	4.56875	83.6849	5.8e-20	1.95e-17	3.41689	5.04363	53.8422	2.17e-13	6.77e-11
5:1:449599211	Hyper	5H	449599211	1	-1.71184	3.89438	17.4118	3.01e-05	0.00176001	-1.54567	3.705	13.8644	0.000196487	0.00595015	-2.31506	4.61186	20.1532	7.15e-06	0.000842682
5:1:449599321	Hyper	5H	449599321	1	-2.41706	4.22079	39.6474	3.04e-10	4.18e-08	-1.98772	4.06412	28.055	1.18e-07	1.12e-05	-2.61732	4.91531	30.2929	3.71e-08	6.51e-06
5:1:454036373	Hypo	5H	454036373	1	4.00977	6.32099	215.281	9.68e-49	1.86e-45	3.70619	5.88611	166.892	3.53e-38	5.21e-35	3.37733	6.21367	104.586	1.51e-24	1.47e-21
5:1:457964013	Hypo	5H	457964013	1	2.41429	5.09096	57.1323	4.07e-14	8.02e-12	2.31115	4.81982	51.3302	7.81e-13	1.41e-10	1.9843	5.3086	28.7861	8.08e-08	1.37e-05
5:1:472399744	Hypo	5H	472399744	1	5.82726	5.48621	200.718	1.46e-45	2.36e-42	5.67099	5.1642	177.937	1.37e-40	2.3e-37	5.01598	5.50701	116.716	3.31e-27	3.95e-24
5:1:481223851	Hyper	5H	481223851	1	-1.55969	4.83793	27.4919	1.58e-07	1.59e-05	-1.31394	4.6627	22.372	2.25e-06	0.000163633	-1.65322	5.39179	21.3731	3.78e-06	0.000479053
5:1:507119513	Hyper	5H	507119513	1	-0.762066	6.51194	16.0491	6.17e-05	0.00318576	-0.954093	6.2453	20.7599	5.21e-06	0.000337731	-1.13293	6.8237	18.7051	1.53e-05	0.00163894
5:1:507332872	Hypo	5H	507332872	1	1.89141	4.50837	21.5986	3.36e-06	0.000267495	2.34155	4.53108	33.4451	7.33e-09	8.63e-07	1.73651	4.97861	16.8984	3.94e-05	0.00369164
5:1:512465674	Hypo	5H	512465674	1	1.34464	5.664	28.1404	1.13e-07	1.16e-05	1.42479	5.51188	29.1259	6.78e-08	6.85e-06	1.26061	6.0192	17.9811	2.23e-05	0.0023087
5:2:514955904	Hypo	5H	514955904	2	4.51702	4.97315	126.171	2.82e-29	1.78e-26	4.23159	4.59187	95.3238	1.62e-22	7.21e-20	3.69451	5.07214	61.3786	4.71e-15	1.72e-12
5:1:518658752	Hyper	5H	518658752	1	-0.799968	8.30322	25.3052	4.89e-07	4.58e-05	-1.05072	8.01937	34.397	4.49e-09	5.44e-07	-1.24979	8.52947	29.083	6.93e-08	1.18e-05
5:1:518983145	Hypo	5H	518983145	1	3.11763	6.11975	147.339	6.62e-34	5.68e-31	3.23033	6.00758	163.898	1.59e-37	2.09e-34	2.74295	6.20854	77.9538	1.05e-18	5.83e-16
5:2:523477836	Hypo	5H	523477836	2	5.2806	5.32806	166.704	3.88e-38	4.36e-35	5.26946	5.11355	165.116	8.63e-38	1.2e-34	4.49315	5.3703	95.4827	1.49e-22	1.08e-19
5:1:523769085	Hypo	5H	523769085	1	2.31228	6.48505	113.932	1.35e-26	6.88e-24	2.18439	6.18841	97.3284	5.87e-23	2.7e-20	1.72578	6.42357	38.2184	6.33e-10	1.41e-07
5:1:526471727	Hypo	5H	526471727	1	4.26537	4.64852	85.3823	2.46e-20	8.05e-18	4.33736	4.48403	89.1895	3.59e-21	1.36e-18	3.70488	4.96022	55.8962	7.64e-14	2.51e-11
5:1:540415935	Hypo	5H	540415935	1	5.65258	5.0656	160.672	8.07e-37	8.29e-34	5.50117	4.7608	135.049	3.22e-31	2.77e-28	4.75142	5.17482	88.916	4.12e-21	2.66e-18
5:1:543608804	Hypo	5H	543608804	1	1.91947	5.05662	40.5334	1.93e-10	2.71e-08	1.74153	4.74795	32.649	1.1e-08	1.26e-06	1.98105	5.52645	32.7	1.08e-08	2.02e-06
6:1:449789	Hyper	6H	449789	1	-0.94793	6.27737	21.7495	3.11e-06	0.000249436	-0.802451	6.12002	14.2592	0.000159276	0.00507647	-1.27423	6.62895	22.1584	2.51e-06	0.00033145
6:1:4609121	Hypo	6H	4609121	1	5.95667	6.05726	239.624	4.75e-54	1.2e-50	5.88074	5.78846	237.033	1.74e-53	4.35e-50	5.47981	6.16774	175.355	5.01e-40	1.22e-36
6:1:16114330	Hypo	6H	16114330	1	1.95488	4.74463	30.413	3.49e-08	3.86e-06	2.27658	4.71628	49.9354	1.59e-12	2.78e-10	2.19243	5.33641	34.9654	3.36e-09	6.79e-07
6:1:21024387	Hypo	6H	21024387	1	6.67756	6.17528	299.335	4.6e-67	1.77e-63	6.83743	6.1098	297.169	1.36e-66	5.79e-63	6.14745	6.30964	205.89	1.08e-46	4.15e-43
6:1:31666658	Hypo	6H	31666658	1	2.44952	4.37623	36.4376	1.58e-09	2.03e-07	2.46143	4.17395	36.0645	1.91e-09	2.39e-07	1.99478	4.78041	19.1262	1.22e-05	0.00134949
6:1:43879251	Hyper	6H	43879251	1	-1.34215	6.37633	40.547	1.92e-10	2.7e-08	-1.15378	6.21561	30.0593	4.19e-08	4.37e-06	-1.62334	6.74718	35.7582	2.23e-09	4.59e-07
6:1:44677597	Hypo	6H	44677597	1	3.6005	5.04182	101.871	5.93e-24	2.59e-21	3.21892	4.59962	72.7608	1.46e-17	3.98e-15	2.8971	5.14286	46.9805	7.17e-12	1.95e-09
6:1:47378315	Hyper	6H	47378315	1	-3.68676	4.19946	75.152	4.36e-18	1.23e-15	-2.60489	4.05373	45.7721	1.33e-11	2.15e-09	-2.86198	4.9454	36.3236	1.67e-09	3.49e-07
6:1:48481099	Hyper	6H	48481099	1	-1.93947	4.64186	37.434	9.46e-10	1.23e-07	-1.34633	4.54004	19.0777	1.26e-05	0.000713016	-1.72656	5.28138	21.2908	3.95e-06	0.000497713
6:2:48521692	Hyper	6H	48521692	2	-0.82521	6.02708	16.1218	5.94e-05	0.00308098	-1.05611	5.74823	23.3908	1.32e-06	0.000101642	-1.39264	6.33071	24.0675	9.3e-07	0.000132607
6:1:48772113	Hypo	6H	48772113	1	3.10605	5.59071	116.265	4.16e-27	2.22e-24	2.81955	5.1911	87.2489	9.57e-21	3.49e-18	2.50244	5.60963	50.3619	1.28e-12	3.77e-10
6:1:53470708	Hyper	6H	53470708	1	-3.49796	4.10372	68.5482	1.24e-16	3.09e-14	-2.89099	3.92175	51.4923	7.19e-13	1.31e-10	-2.84335	4.85546	33.4783	7.21e-09	1.39e-06
6:1:53519409	Hypo	6H	53519409	1	4.49699	4.58378	91.6719	1.02e-21	3.61e-19	4.68355	4.49004	96.9439	7.13e-23	3.24e-20	4.08785	5.00493	66.2443	3.98e-16	1.56e-13
6:1:66373626	Hyper	6H	66373626	1	-3.53723	4.44469	76.4795	2.23e-18	6.37e-16	-4.10719	4.20235	89.8271	2.6e-21	1e-18	-4.11929	5.09618	65.309	6.4e-16	2.47e-13
6:1:66400131	Hyper	6H	66400131	1	-2.63067	6.27004	133.079	8.69e-31	6.22e-28	-2.73055	6.04313	138.768	4.95e-32	4.36e-29	-3.06001	6.69766	102.492	4.33e-24	3.93e-21
6:1:66757930	Hypo	6H	66757930	1	1.03627	7.91164	28.0741	1.17e-07	1.2e-05	1.5621	8.0698	70.5412	4.51e-17	1.19e-14	1.34975	8.4283	33.901	5.8e-09	1.14e-06
6:2:66907192	Hyper	6H	66907192	2	-6.51655	6.63186	455.892	3.77e-101	5.5e-97	-7.08745	6.4109	464.23	5.77e-103	1.39e-98	-6.93713	7.10088	268.269	2.7e-60	2.9e-56
6:1:67072170	Hyper	6H	67072170	1	-3.69592	4.1721	70.8866	3.78e-17	9.79e-15	-3.75718	3.95615	70.2832	5.14e-17	1.35e-14	-3.97649	4.88321	53.3124	2.85e-13	8.71e-11
6:1:67203726	Hyper	6H	67203726	1	-1.31136	5.95968	31.9866	1.55e-08	1.81e-06	-1.65457	5.66107	47.4946	5.52e-12	9.12e-10	-1.60399	6.36229	30.8433	2.8e-08	5.07e-06
6:1:67640507	Hyper	6H	67640507	1	-1.15142	7.93742	44.4953	2.55e-11	3.94e-09	-1.06899	7.75673	36.4108	1.6e-09	2.03e-07	-1.49765	8.21701	40.5879	1.88e-10	4.38e-08
6:2:77812051	Hypo	6H	77812051	2	6.83394	5.9598	292.227	1.63e-65	5.94e-62	6.68947	5.64153	251.249	1.39e-56	4.01e-53	5.83957	5.83736	159.683	1.33e-36	2.63e-33
6:1:85213592	Hypo	6H	85213592	1	3.19012	4.22374	46.5266	9.04e-12	1.47e-09	3.22479	4.03154	44.5885	2.43e-11	3.79e-09	2.52487	4.6306	24.8435	6.22e-07	9.11e-05
6:2:85411177	Hyper	6H	85411177	2	-4.93653	4.4239	124.261	7.39e-29	4.46e-26	-5.48034	4.20556	134.841	3.58e-31	3.01e-28	-4.91875	5.11686	82.4359	1.09e-19	6.57e-17
6:1:94732700	Hypo	6H	94732700	1	4.75362	4.74644	98.2193	3.75e-23	1.52e-20	5.06067	4.73118	119.715	7.3e-28	4.8e-25	4.25708	5.07974	74.4815	6.12e-18	2.98e-15
6:1:100443319	Hyper	6H	100443319	1	-1.69936	8.32192	103.629	2.44e-24	1.09e-21	-1.83303	8.08322	108.497	2.09e-25	1.15e-22	-2.10348	8.61161	77.7087	1.19e-18	6.47e-16
6:1:102972723	Hypo	6H	102972723	1	1.94323	8.09715	111.125	5.56e-26	2.72e-23	1.83644	7.81487	106.47	5.82e-25	3.09e-22	1.53485	8.09461	42.8432	5.93e-11	1.49e-08
6:1:111543414	Hypo	6H	111543414	1	2.39042	6.89065	120.929	3.96e-28	2.21e-25	2.59638	6.84879	132.026	1.48e-30	1.12e-27	2.2504	7.09993	72.8579	1.39e-17	6.49e-15
6:1:113991117	Hyper	6H	113991117	1	-1.58237	4.43771	20.2213	6.9e-06	0.000506989	-1.67282	4.20465	23.4756	1.27e-06	9.78e-05	-1.61575	5.07631	15.843	6.88e-05	0.00588552
6:1:115789633	Hypo	6H	115789633	1	3.54512	5.55272	134.882	3.5e-31	2.64e-28	3.64126	5.42782	133.472	7.13e-31	5.72e-28	3.03955	5.63401	68.998	9.86e-17	4.13e-14
6:1:117451955	Hyper	6H	117451955	1	-1.71867	4.50555	25.6889	4.01e-07	3.81e-05	-1.40148	4.3355	15.5203	8.16e-05	0.00315612	-2.43299	5.0583	31.7323	1.77e-08	3.25e-06
6:1:117502400	Hyper	6H	117502400	1	-2.03829	4.07436	28.3193	1.03e-07	1.06e-05	-1.54892	3.9187	17.2617	3.26e-05	0.00155049	-2.5359	4.75931	25.7346	3.92e-07	5.95e-05
6:1:117719846	Hyper	6H	117719846	1	-0.833497	5.93477	15.7703	7.15e-05	0.00357739	-0.79225	5.75035	13.2512	0.000272403	0.00748782	-1.40374	6.24719	23.7585	1.09e-06	0.00015405
6:2:120523111	Hyper	6H	120523111	2	-5.83932	4.64393	170.972	4.54e-39	5.81e-36	-5.84345	4.42924	166.607	4.08e-38	5.81e-35	-5.27518	5.30913	100.395	1.25e-23	1.03e-20
6:1:171766237	Hypo	6H	171766237	1	2.70824	4.91085	68.0646	1.58e-16	3.86e-14	2.44339	4.55243	45.0014	1.97e-11	3.09e-09	2.13166	5.10583	28.2449	1.07e-07	1.76e-05
6:1:171940921	Hyper	6H	171940921	1	-2.56367	7.79102	184.505	5.03e-42	7.35e-39	-2.55976	7.57804	174.171	9.08e-40	1.49e-36	-2.95118	8.13872	130.747	2.81e-30	4.07e-27
6:1:174607186	Hyper	6H	174607186	1	-1.77553	4.31423	25.1909	5.19e-07	4.82e-05	-1.8675	4.08724	26.4172	2.75e-07	2.45e-05	-2.06551	4.94726	22.044	2.66e-06	0.000350079
6:1:176529330	Hypo	6H	176529330	1	3.06636	5.14398	88.0762	6.3e-21	2.13e-18	2.76576	4.75175	64.7432	8.53e-16	1.98e-13	2.66013	5.35981	48.3429	3.58e-12	1.01e-09
6:1:184450059	Hypo	6H	184450059	1	1.4913	5.8401	33.4891	7.17e-09	8.7e-07	2.07341	6.02568	74.988	4.74e-18	1.33e-15	1.69822	6.32556	35.3518	2.75e-09	5.61e-07
6:2:193027281	Hypo	6H	193027281	2	1.64675	5.57969	46.4232	9.53e-12	1.54e-09	1.38881	5.22367	29.993	4.34e-08	4.51e-06	1.19523	5.75167	14.8539	0.000116168	0.0091169
6:1:202231356	Hyper	6H	202231356	1	-2.89743	4.1205	44.9702	2e-11	3.13e-09	-1.91102	4.00352	23.7223	1.11e-06	8.67e-05	-1.86342	4.91165	17.3667	3.08e-05	0.00302543
6:1:210284359	Hypo	6H	210284359	1	4.05647	4.94884	96.5551	8.68e-23	3.42e-20	4.1642	4.80703	111.998	3.58e-26	2.02e-23	3.68828	5.24258	69.9803	5.99e-17	2.53e-14
6:1:210546660	Hypo	6H	210546660	1	5.2563	4.47007	91.9993	8.67e-22	3.1e-19	5.43865	4.35963	102.732	3.84e-24	1.97e-21	4.87368	5.02625	83.9766	5.01e-20	3.05e-17
6:1:259709553	Hypo	6H	259709553	1	1.34216	5.35274	24.8311	6.26e-07	5.71e-05	1.61241	5.32773	32.3126	1.31e-08	1.49e-06	1.3112	5.77008	17.3542	3.1e-05	0.00303979
6:1:265543930	Hypo	6H	265543930	1	2.48223	4.31863	37.6129	8.63e-10	1.13e-07	2.52835	4.13786	34.8282	3.6e-09	4.39e-07	1.92594	4.71004	17.0949	3.56e-05	0.00341564
6:2:266717020	Hypo	6H	266717020	2	2.79408	4.81314	62.8449	2.24e-15	5.04e-13	2.56678	4.47911	50.5607	1.16e-12	2.05e-10	1.96752	4.9387	21.5193	3.5e-06	0.000445991
6:1:269000336	Hypo	6H	269000336	1	5.26241	5.30059	159.615	1.37e-36	1.37e-33	5.69654	5.41915	204.874	1.8e-46	3.62e-43	4.93759	5.61416	121.942	2.38e-28	3.11e-25
6:1:269026100	Hyper	6H	269026100	1	-2.56559	4.7836	54.319	1.7e-13	3.17e-11	-1.98242	4.65273	37.3412	9.92e-10	1.29e-07	-3.28	5.35093	59.3697	1.31e-14	4.67e-12
6:1:270927786	Hypo	6H	270927786	1	2.25038	6.48878	102.821	3.67e-24	1.62e-21	2.07957	6.16545	77.1296	1.6e-18	4.68e-16	1.69168	6.45072	37.1794	1.08e-09	2.32e-07
6:2:270990033	Hypo	6H	270990033	2	1.49763	7.79849	68.0159	1.62e-16	3.95e-14	1.34991	7.4929	53.3288	2.82e-13	5.41e-11	1.02755	7.80451	18.8654	1.4e-05	0.00152828
6:1:271032519	Hypo	6H	271032519	1	1.99839	4.97399	46.2866	1.02e-11	1.65e-09	1.81702	4.66629	32.124	1.45e-08	1.62e-06	1.51142	5.21052	16.8428	4.06e-05	0.00377885
6:1:272240637	Hypo	6H	272240637	1	1.8544	5.01615	35.102	3.13e-09	3.97e-07	1.92859	4.86782	31.7124	1.79e-08	1.97e-06	1.5414	5.31872	18.4965	1.7e-05	0.00180672
[truncated: 130 more rows]
