# Supplementary material for: Salt Stress Induces Non-CG Methylation in Coding Regions of Barley Seedlings (<em>Hordeum vulgare</em>)
Source: Preprints.org preprint supplement (doi:10.20944/preprints201804.0323.v2), 2018-06-15
Supplement: Supplementary file 3 [file Supplemental_Dataset_S2_DM-genes.xlsx]

## Sheet: Info
Supplemental Data Set S2. List of salt-induced differentially methylated genes
Title: Methylation-sensitive GBS reveals non-CG methylation in gene-body induced by salt stress in barley seedlings (Hordeum vulgare)
Moumouni Konate1, Mike J. Wilkinson2, Benjamin T. Mayne3, Stephen M. Pederson4, Eileen S. Scott5, Bettina Berger5, 6, Carlos Marcelino Rodriguez Lopez5,7*
1,5Institut de l'Environnement et de Recherches Agricoles (INERA), Station de Farako-Ba, 01 BP 910 Bobo-Dioulasso 01, Burkina Faso; email: mouni.konate@gmail.com.
2Pwllpeiran Upland Research Centre, Institute of Biological, Environmental and Rural Sciences, Penglais Campus, Aberystwyth, Ceredigion, SY23 3FG, UK.
3Robinson Research Institute, School of Medicine, The University of Adelaide, SA 5005 Australia
4Bioinformatics Hub, School of Biological sciences, The University of Adelaide, SA 5005 Australia
5School of Agriculture, Food and Wine, The University of Adelaide, Waite Campus, PMB 1, Glen Osmond, SA 5064, Australia
6The Plant Accelerator, Australian Plant Phenomics Facility, Waite Campus, The University of Adelaide, SA 5064, Australia
7Environmental Epigenetics and Genetics Group; Department of Horticulture, College of Agriculture, Food and Environment, University of Kentucky, Lexington, KY 40546, USA
*Corresponding authors: mjw19@aber.ac.uk (M.J.M.); carlos.rodriguezlopez@uky.edu (C.M.R.L.);
Tel.: +44-(0)-1970-823204 (M.J.M.); +1-859-257-5020 ext. 80749 (C.M.R.L.)

## Sheet: DM_hypogenes_leaves
List of salt-induced differentially hypomethylated genes in leaves
GeneID	Chromosome	start	end	strand	DMM position	Distance to gene (bp)
MLOC_55537	1H	271693	273288	1	273679	392
MLOC_13737	1H	918701	922491	1	919059	0
MLOC_44278	1H	1202190	1205344	1	1204141	0
MLOC_9830	1H	1969985	1972167	1	1970875	0
MLOC_61515	1H	2898736	2899330	1	2898975	0
MLOC_37717	1H	2983308	2987632	1	2991961	4330
MLOC_11917	1H	3178350	3180484	1	3179021	0
MLOC_10656	1H	6693409	6694182	1	6690251	-3157
MLOC_68710	1H	10996441	10999248	1	11003212	3965
MLOC_58150	1H	11108778	11114381	1	11116331	1951
MLOC_9970	1H	12201608	12206907	1	12204515	0
MLOC_53279	1H	18707985	18710237	1	18710619	383
MLOC_16241	1H	19421409	19423481	1	19423049	0
MLOC_17935	1H	19724332	19725463	1	19726338	876
MLOC_36684	1H	29986914	29990459	1	29988668	0
MLOC_37736	1H	30033017	30034213	1	30033392	0
MLOC_11790	1H	37622358	37629497	1	37618798	-3559
MLOC_33802	1H	37641968	37644065	1	37643666	0
MLOC_67446	1H	41568471	41570636	1	41565834	-2636
MLOC_10770	1H	41785982	41790943	1	41790838	0
MLOC_59394	1H	42651594	42652780	1	42649523	-2070
MLOC_43104	1H	45452996	45455975	1	45453466	0
MLOC_61019	1H	47242620	47245375	1	47243879	0
MLOC_33538	1H	49103673	49104614	1	49108241	3628
MLOC_55352	1H	60647040	60654068	2	60651996	0
MLOC_21736	1H	62463608	62465018	1	62464716	0
MLOC_67637	1H	62839753	62841293	1	62840855	0
MLOC_69164	1H	73757506	73762571	1	73758087	0
MLOC_12550	1H	76309195	76312638	1	76315873	3236
MLOC_69611	1H	91429682	91436831	1	91430104	0
MLOC_79396	1H	95777020	95777449	1	95781685	4237
MLOC_63539	1H	123726283	123729460	1	123726335	0
MLOC_17720	1H	123839234	123840760	1	123838987	-246
MLOC_20060	1H	123845874	123847934	1	123846940	0
MLOC_11126	1H	126180308	126189118	1	126183944	0
MLOC_63208	1H	126236335	126239615	1	126236769	0
MLOC_69853	1H	129160345	129165519	1	129158349	-1995
MLOC_10718	1H	147508879	147511222	1	147509458	0
MLOC_5821	1H	151008582	151010066	1	151010589	524
MLOC_39437	1H	151825312	151828161	1	151829523	1363
MLOC_16333	1H	152779890	152782960	1	152780883	0
MLOC_65080	1H	153248440	153249360	1	153248875	0
MLOC_73251	1H	154105531	154113577	1	154109384	0
MLOC_6900	1H	155307681	155310859	1	155314228	3370
MLOC_65546	1H	155622344	155627966	1	155630460	2495
MLOC_36602	1H	158018271	158019502	1	158015025	-3245
MLOC_59793	1H	159248745	159250317	1	159249928	0
MLOC_79167	1H	164564321	164565285	1	164564919	0
MLOC_19955	1H	178623257	178625850	1	178629057	3208
MLOC_67136	1H	210968315	210974588	1	210968694	0
MLOC_10420	1H	242224092	242233575	1	242228974	0
MLOC_16470	1H	242465772	242469701	1	242461394	-4377
MLOC_44938	1H	278846692	278847365	1	278849779	2415
MLOC_38198	1H	284479805	284484410	1	284478598	-1206
MLOC_10050	1H	284528351	284530176	1	284533409	3234
MLOC_4431	1H	285329258	285331600	1	285325351	-3906
MLOC_75615	1H	286558114	286559793	1	286559366	0
MLOC_52636	1H	293476878	293484045	2	293480824	0
MLOC_57040	1H	295869691	295874239	1	295869907	0
MLOC_60840	1H	305682697	305686149	1	305687077	929
MLOC_61784	1H	309943526	309946172	1	309946102	0
MLOC_9808	1H	310170840	310173746	1	310173313	0
MLOC_5111	1H	311200094	311201975	1	311199142	-951
MLOC_70897	1H	314417961	314421125	1	314418250	0
MLOC_26177	1H	314485139	314485997	1	314490489	4493
MLOC_7030	1H	329261123	329265819	1	329267124	1306
MLOC_12977	1H	349211286	349217141	1	349216341	0
MLOC_12040	1H	351182293	351184807	1	351188708	3902
MLOC_16345	1H	358633803	358636606	1	358634436	0
MLOC_7466	1H	362168085	362170603	1	362169858	0
MLOC_52366	1H	362862961	362869766	1	362862961	0
MLOC_34489	1H	362888068	362892359	1	362893652	1294
MLOC_44017	1H	363050193	363054411	1	363052796	0
MLOC_8595	1H	364901406	364903114	1	364902579	0
MLOC_63528	1H	370191257	370193815	1	370190736	-520
MLOC_37107	1H	371214963	371216676	1	371215853	0
MLOC_11591	1H	372664328	372668224	1	372660406	-3921
MLOC_76003	1H	383322254	383324727	1	383323808	0
MLOC_14006	1H	395334081	395339765	2	395336960	0
MLOC_52730	1H	398201430	398206694	1	398201682	0
MLOC_68678	1H	398591702	398595289	1	398592927	0
MLOC_36339	1H	401964600	401972492	1	401973978	1487
MLOC_58251	1H	402450680	402458484	1	402459424	941
MLOC_56003	1H	409507437	409511134	1	409507998	0
MLOC_61816	1H	411976177	411979224	1	411983470	4247
MLOC_71041	1H	412904761	412906497	1	412906264	0
MLOC_58493	1H	416318396	416323417	1	416318588	0
MLOC_68785	1H	416553321	416556847	1	416560916	4070
MLOC_7035	1H	418558740	418562765	1	418561316	0
MLOC_18441	1H	419090042	419098687	1	419091543	0
MLOC_60622	1H	419905751	419907083	1	419906929	0
MLOC_73858	1H	428758698	428765184	1	428763796	0
MLOC_6461	1H	428959971	428961192	2	428960058	0
MLOC_58461	1H	430390922	430393511	1	430387891	-3030
MLOC_50930	1H	430488598	430492095	1	430490233	0
MLOC_18751	1H	430526537	430530975	1	430532244	1270
MLOC_43814	1H	430584954	430588966	1	430589296	331
MLOC_4273	1H	430919119	430923972	1	430920147	0
MLOC_51193	1H	430974357	430980136	1	430975950	0
MLOC_75960	1H	431056562	431060663	1	431058014	0
MLOC_37998	1H	434899918	434900453	1	434900260	0
MLOC_69311	1H	436345116	436346983	1	436342952	-2163
MLOC_13594	1H	436584574	436585875	1	436586287	413
MLOC_65827	1H	437723849	437729382	1	437729149	0
MLOC_3959	1H	437796455	437800849	1	437796110	-344
MLOC_498	1H	437806556	437809783	1	437808560	0
MLOC_3718	1H	437953512	437955768	1	437949953	-3558
MLOC_497	1H	439915390	439916685	1	439914454	-935
MLOC_7164	1H	440714926	440715874	1	440714512	-413
MLOC_44910	1H	449971533	449973348	1	449973682	335
MLOC_78723	1H	451432975	451435940	1	451440025	4086
MLOC_36464	1H	452972815	452980741	1	452969994	-2820
MLOC_39527	1H	453081353	453083004	1	453082491	0
MLOC_18286	1H	453787361	453789605	1	453787755	0
MLOC_53629	1H	455012892	455022832	2	455018918	0
MLOC_37492	1H	455546066	455549416	1	455546388	0
MLOC_15900	1H	455560829	455563432	1	455560953	0
MLOC_20244	1H	455663898	455670097	1	455664292	0
MLOC_20244	1H	455663898	455670097	1	455669045	0
MLOC_53577	1H	455802578	455804048	1	455803885	0
MLOC_40554	1H	455901357	455902161	1	455902078	0
MLOC_37402	1H	456096012	456104613	1	456096659	0
MLOC_75500	1H	456624494	456626304	1	456626041	0
MLOC_37508	1H	456703136	456705385	1	456707766	2382
MLOC_10939	1H	457587551	457593622	1	457590734	0
MLOC_6992	1H	461387926	461391407	1	461388357	0
MLOC_6992	1H	461387926	461391407	1	461390247	0
MLOC_7214	1H	462392347	462394041	1	462388160	-4186
MLOC_37532	1H	462415762	462422758	1	462416549	0
MLOC_54502	1H	463018329	463019915	1	463023518	3604
MLOC_15072	2H	1833920	1835715	1	1834432	0
MLOC_20970	2H	2670394	2673463	1	2675588	2126
MLOC_80130	2H	2699833	2702554	1	2706359	3806
MLOC_25595	2H	8123346	8124704	1	8123755	0
MLOC_25595	2H	8123346	8124704	1	8123812	0
MLOC_7936	2H	8632294	8635961	1	8627486	-4807
MLOC_37472	2H	8681790	8682930	1	8682468	0
MLOC_58616	2H	8757661	8761856	1	8760184	0
MLOC_40495	2H	8870047	8871542	1	8870469	0
MLOC_40495	2H	8870047	8871542	1	8870500	0
MLOC_44240	2H	10147414	10148573	1	10143387	-4026
MLOC_10026	2H	16062169	16066861	1	16069889	3029
MLOC_11990	2H	16129295	16135096	1	16134626	0
MLOC_5849	2H	17217452	17220986	1	17213623	-3828
MLOC_56278	2H	18275259	18277494	1	18281008	3515
MLOC_69091	2H	20264273	20265864	1	20259683	-4589
MLOC_67137	2H	24814091	24817335	1	24809621	-4469
MLOC_5607	2H	27152090	27153619	1	27153262	0
MLOC_50785	2H	27437804	27441579	1	27439626	0
MLOC_44360	2H	27694417	27694937	1	27696137	1201
MLOC_56952	2H	27971070	27972725	1	27967555	-3514
MLOC_20947	2H	29205269	29206601	1	29202836	-2432
MLOC_65226	2H	40053868	40059832	1	40057732	0
MLOC_60369	2H	40095106	40096495	1	40095428	0
MLOC_55663	2H	45887892	45889505	1	45889272	0
MLOC_33192	2H	47184789	47186189	1	47187133	945
MLOC_36861	2H	47207270	47210582	1	47207668	0
MLOC_64099	2H	59725544	59731096	1	59730799	0
MLOC_32111	2H	62475141	62479108	1	62471012	-4128
MLOC_69441	2H	62495220	62496559	1	62494217	-1002
MLOC_15383	2H	71112805	71115517	1	71113243	0
MLOC_54485	2H	82409108	82412008	1	82409407	0
MLOC_15174	2H	82464183	82466959	1	82464292	0
MLOC_79950	2H	84031269	84032467	1	84031953	0
MLOC_57860	2H	87585475	87588306	1	87583016	-2458
MLOC_8615	2H	88397699	88402916	1	88398142	0
MLOC_64488	2H	88797663	88801718	1	88797823	0
MLOC_55263	2H	90368143	90371516	1	90369245	0
MLOC_32083	2H	91128787	91129111	1	91131810	2700
MLOC_67100	2H	98896776	98903152	1	98905545	2394
MLOC_63150	2H	106032380	106035267	1	106030588	-1791
MLOC_60969	2H	114226754	114229426	1	114226950	0
MLOC_1442	2H	115050991	115053388	1	115051017	0
MLOC_52355	2H	142206228	142207875	1	142207583	0
MLOC_50341	2H	161444813	161449541	1	161448534	0
MLOC_37423	2H	368938442	368943495	1	368943492	0
MLOC_80143	2H	388201594	388207249	1	388197789	-3804
MLOC_37693	2H	390372041	390373950	1	390370710	-1330
MLOC_63407	2H	408488733	408491098	1	408490871	0
MLOC_16890	2H	408724210	408728477	1	408724807	0
MLOC_36000	2H	412800066	412800498	1	412801684	1187
MLOC_43945	2H	414665001	414671661	1	414669619	0
MLOC_1304	2H	421681692	421683331	1	421682404	0
MLOC_72001	2H	423511717	423518653	1	423512130	0
MLOC_61110	2H	427504624	427510771	1	427513330	2560
MLOC_60070	2H	429410568	429410851	1	429409097	-1470
MLOC_5243	2H	433823347	433825857	1	433824451	0
MLOC_37876	2H	435218983	435225539	1	435225975	437
MLOC_27993	2H	435348577	435355334	1	435348968	0
MLOC_5071	2H	435788041	435790512	1	435788050	0
MLOC_62832	2H	435795085	435799295	1	435791924	-3160
MLOC_80753	2H	436003576	436007711	1	436007419	0
MLOC_4305	2H	436047518	436054087	1	436047944	0
MLOC_60914	2H	436389983	436393804	1	436395682	1879
MLOC_38227	2H	436498252	436503163	1	436498454	0
MLOC_13480	2H	436838516	436840009	1	436843147	3139
MLOC_61961	2H	438033267	438036037	1	438034969	0
MLOC_77488	2H	438652125	438653529	1	438650824	-1300
MLOC_79323	2H	438659591	438663097	1	438666093	2997
MLOC_51106	2H	469193499	469195079	1	469195351	273
MLOC_38104	2H	475282275	475287056	1	475288275	1220
MLOC_67972	2H	475335454	475337764	1	475337321	0
MLOC_60933	2H	479845580	479853145	1	479843087	-2492
MLOC_12688	2H	480188103	480195851	1	480188465	0
MLOC_10773	2H	480244449	480248310	2	480249252	943
MLOC_54736	2H	480480290	480485936	1	480484804	0
MLOC_38368	2H	483513980	483516335	1	483516018	0
MLOC_4794	2H	490447119	490460898	1	490445355	-1763
MLOC_5604	2H	493405179	493406577	1	493405095	-83
MLOC_60921	2H	493853733	493856154	1	493855474	0
MLOC_4084	2H	495520907	495526751	2	495525129	0
MLOC_64400	2H	495544210	495550797	1	495547800	0
MLOC_62024	2H	495680762	495686344	1	495680767	0
MLOC_13053	2H	495824042	495824749	1	495823644	-397
MLOC_67169	2H	496292896	496293612	1	496293155	0
MLOC_13244	2H	499822809	499824695	1	499818625	-4183
MLOC_27003	2H	502695475	502696257	1	502695794	0
MLOC_10834	2H	507751109	507752096	1	507752472	377
MLOC_12658	2H	509223106	509229895	1	509223622	0
MLOC_750	2H	513518569	513521010	1	513519396	0
MLOC_16652	2H	525358535	525364616	1	525365935	1320
MLOC_10204	2H	525414989	525420995	1	525415074	0
MLOC_14216	2H	530059482	530064443	1	530056697	-2784
MLOC_50075	2H	530808521	530811196	1	530809984	0
MLOC_35786	2H	530910119	530912654	1	530908185	-1933
MLOC_8620	2H	535891381	535894357	1	535891573	0
MLOC_10546	2H	539098511	539102322	1	539101329	0
MLOC_4540	2H	539895970	539896694	1	539895609	-360
MLOC_37569	2H	542449358	542453698	1	542447528	-1829
MLOC_64527	2H	544218503	544221056	1	544221226	171
MLOC_69140	2H	545548207	545551018	1	545550511	0
MLOC_12266	2H	545606884	545613147	1	545604685	-2198
MLOC_27304	2H	545706537	545706943	1	545702351	-4185
MLOC_67122	2H	546226492	546235266	1	546223539	-2952
MLOC_64926	2H	547066475	547069844	1	547073926	4083
MLOC_55544	2H	547083804	547090858	1	547091359	502
MLOC_3886	2H	547216085	547222035	1	547216785	0
MLOC_58411	2H	548424833	548427538	1	548425250	0
MLOC_44720	2H	548615718	548618729	1	548622822	4094
MLOC_63772	2H	548689539	548692788	1	548692500	0
MLOC_20016	2H	549466597	549469082	1	549467402	0
MLOC_12089	2H	549802419	549805700	1	549802677	0
MLOC_6366	2H	550529872	550536691	1	550536069	0
MLOC_34820	2H	550571013	550572851	1	550571556	0
MLOC_51720	2H	551336391	551345567	2	551337979	0
MLOC_11263	2H	551395080	551397161	1	551390205	-4874
MLOC_76462	2H	551573832	551577747	1	551574276	0
MLOC_61959	2H	552304818	552309090	1	552306157	0
MLOC_77511	2H	553319762	553325413	1	553325829	417
MLOC_74810	2H	554495698	554499253	1	554495189	-508
MLOC_11705	2H	555441415	555443173	1	555441376	-38
MLOC_64385	2H	556355516	556359961	1	556358796	0
MLOC_65218	2H	557679986	557684744	1	557682518	0
MLOC_74104	2H	557700569	557701948	1	557701119	0
MLOC_55473	2H	558540217	558542413	1	558541351	0
MLOC_34710	2H	558763761	558765442	1	558766032	591
MLOC_64169	2H	558860776	558867956	2	558861618	0
MLOC_68641	2H	560801504	560808332	1	560801622	0
MLOC_58742	2H	565402352	565406521	1	565405315	0
MLOC_6578	2H	565601061	565602069	1	565606310	4242
MLOC_8320	2H	568527447	568528865	1	568532056	3192
MLOC_49005	2H	574584794	574589028	1	574581457	-3336
MLOC_54515	2H	578609761	578612775	1	578610381	0
MLOC_73327	2H	578779530	578787682	1	578787676	0
MLOC_16978	2H	579240576	579241513	1	579240708	0
MLOC_7281	2H	579529608	579533199	1	579528770	-837
MLOC_71450	2H	579928330	579930987	1	579935553	4567
MLOC_38237	2H	581494178	581496201	1	581494447	0
MLOC_12108	2H	581968093	581971184	1	581967433	-659
MLOC_12474	2H	582305988	582307022	1	582310097	3076
MLOC_57639	2H	582626108	582631431	1	582633967	2537
MLOC_63051	2H	584636967	584641986	1	584642066	81
MLOC_70640	2H	584825073	584826286	1	584825981	0
MLOC_3355	2H	588364989	588366970	1	588360433	-4555
MLOC_73438	2H	588821828	588827005	1	588823224	0
MLOC_44916	2H	588939681	588942610	1	588946439	3830
MLOC_73972	2H	590145473	590147191	1	590147698	508
MLOC_54057	2H	592637167	592644577	1	592644178	0
MLOC_52447	2H	595959098	595961133	1	595957784	-1313
MLOC_15558	2H	602248521	602249953	1	602248176	-344
MLOC_10305	2H	602462637	602466818	1	602467973	1156
MLOC_56096	2H	602845608	602852514	1	602847434	0
MLOC_48781	2H	603687516	603689398	1	603691729	2332
MLOC_15146	2H	603724704	603727088	1	603726401	0
MLOC_72280	2H	603737920	603738832	1	603741064	2233
MLOC_66987	2H	605446586	605447903	1	605446914	0
MLOC_11661	2H	606188292	606196646	1	606189003	0
MLOC_45016	2H	608880255	608882625	1	608881459	0
MLOC_17210	2H	609165461	609166488	1	609162814	-2646
MLOC_61444	2H	609298740	609300254	1	609298886	0
MLOC_74526	2H	610005082	610008907	1	610013502	4596
MLOC_10930	2H	610519742	610523221	1	610521887	0
MLOC_67330	2H	612780637	612782377	1	612776170	-4466
MLOC_54283	2H	613467631	613470671	1	613465073	-2557
MLOC_37328	2H	615490538	615494123	1	615493335	0
MLOC_14157	2H	616067441	616072325	1	616070270	0
MLOC_57137	2H	616263506	616265694	1	616265384	0
MLOC_56589	2H	616271619	616274718	1	616278628	3911
MLOC_68682	2H	617242663	617245307	1	617241142	-1520
MLOC_44533	2H	618370251	618373195	1	618371169	0
MLOC_20891	2H	621509561	621511532	1	621509206	-354
MLOC_27609	2H	623022447	623023931	1	623021953	-493
MLOC_71595	2H	623086539	623089435	1	623086828	0
MLOC_60852	2H	623936499	623940366	1	623943209	2844
MLOC_65889	2H	624006290	624017582	1	624021368	3787
MLOC_20130	2H	625397503	625405869	1	625398392	0
MLOC_9102	3H	6208869	6209070	1	6204931	-3937
MLOC_57745	3H	6463670	6464505	1	6463341	-328
MLOC_13070	3H	6551653	6552494	1	6552328	0
MLOC_55095	3H	7597913	7601834	1	7601404	0
MLOC_39247	3H	8313772	8316875	1	8314333	0
MLOC_56554	3H	8967733	8971721	1	8970973	0
MLOC_57224	3H	12530194	12533921	1	12532653	0
MLOC_61713	3H	13257860	13261741	1	13262055	315
MLOC_53204	3H	14514553	14519948	1	14517856	0
MLOC_56567	3H	17162021	17163486	1	17158999	-3021
MLOC_62979	3H	17268622	17272799	1	17272262	0
MLOC_15154	3H	18092013	18099908	1	18090490	-1522
MLOC_76498	3H	18337154	18342362	2	18343688	1327
MLOC_62285	3H	19123087	19130755	1	19126570	0
MLOC_6230	3H	19450785	19453088	1	19452046	0
MLOC_22265	3H	21081296	21084902	1	21084563	0
MLOC_40267	3H	21090172	21092796	1	21091131	0
MLOC_7520	3H	27457744	27463975	1	27459818	0
MLOC_64175	3H	27477262	27480574	1	27482645	2072
MLOC_66417	3H	27520328	27525025	1	27521140	0
MLOC_2513	3H	29009566	29017936	1	29021899	3964
MLOC_64374	3H	29030113	29034537	1	29030689	0
MLOC_34498	3H	29038294	29042760	1	29047374	4615
MLOC_37902	3H	29121489	29123625	1	29121743	0
MLOC_55623	3H	29427342	29434595	1	29439436	4842
MLOC_7181	3H	33388139	33389255	1	33387951	-187
MLOC_27148	3H	33795645	33801268	1	33805775	4508
MLOC_56579	3H	35649100	35652909	1	35651076	0
MLOC_56912	3H	37548335	37551559	1	37545379	-2955
MLOC_60621	3H	44653002	44657133	1	44652154	-847
MLOC_36460	3H	46201765	46203205	1	46202366	0
MLOC_57556	3H	47875011	47887390	1	47886493	0
MLOC_36342	3H	47935833	47939471	1	47937522	0
MLOC_11893	3H	48030072	48036008	1	48030508	0
MLOC_36518	3H	48185529	48191301	1	48188256	0
MLOC_70538	3H	50853633	50862630	1	50848873	-4759
MLOC_79028	3H	53063526	53068273	1	53063689	0
MLOC_55827	3H	53082944	53089609	1	53091711	2103
MLOC_31360	3H	53273886	53275327	1	53274554	0
MLOC_71087	3H	65799274	65806214	1	65799989	0
MLOC_7939	3H	72491506	72493515	1	72490694	-811
MLOC_15898	3H	88443958	88450406	1	88444251	0
MLOC_51169	3H	88458742	88464287	1	88464011	0
MLOC_53497	3H	99588976	99597630	1	99593601	0
MLOC_53923	3H	99654033	99658338	1	99650024	-4008
MLOC_7670	3H	117102214	117107227	1	117102791	0
MLOC_71981	3H	129389755	129393536	2	129393369	0
MLOC_14078	3H	140104839	140108856	1	140104934	0
MLOC_70576	3H	141116151	141119581	1	141114041	-2109
MLOC_68655	3H	141797665	141802642	1	141803458	817
MLOC_65945	3H	141906589	141910998	1	141907022	0
MLOC_70826	3H	142367405	142371614	1	142368321	0
MLOC_12123	3H	142698720	142699904	1	142693941	-4778
MLOC_30751	3H	145352792	145353555	1	145350037	-2754
MLOC_12117	3H	156209247	156214497	1	156211665	0
MLOC_11531	3H	160153674	160157558	1	160157113	0
MLOC_79033	3H	173896790	173901060	1	173900740	0
MLOC_52548	3H	244739550	244741716	1	244740026	0
MLOC_52549	3H	244743070	244748676	1	244743800	0
MLOC_37071	3H	256583471	256589684	1	256588382	0
MLOC_6314	3H	256767642	256769459	1	256767311	-330
MLOC_56597	3H	267211158	267218698	2	267213217	0
MLOC_12215	3H	268095703	268100933	1	268100352	0
MLOC_13771	3H	269628092	269632020	1	269629228	0
MLOC_4453	3H	273750281	273756160	1	273750474	0
MLOC_4738	3H	283213472	283218947	1	283215238	0
MLOC_4738	3H	283213472	283218947	1	283218168	0
MLOC_51868	3H	351518971	351524354	1	351519238	0
MLOC_51868	3H	351518971	351524354	1	351519767	0
MLOC_58522	3H	351646759	351650774	1	351649973	0
MLOC_67504	3H	351968210	351970038	1	351971385	1348
MLOC_60702	3H	352276939	352279221	1	352277872	0
MLOC_65481	3H	352501658	352505503	1	352501999	0
MLOC_71129	3H	353972359	353974145	1	353973445	0
MLOC_5223	3H	366452204	366458771	1	366453242	0
MLOC_36627	3H	366553535	366556942	1	366555979	0
MLOC_21279	3H	367087431	367091240	1	367090499	0
MLOC_140	3H	367969501	367976322	1	367971347	0
MLOC_38392	3H	368522264	368527246	1	368520877	-1386
MLOC_442	3H	377670842	377672117	1	377671780	0
MLOC_9632	3H	380693644	380695761	1	380695472	0
MLOC_81772	3H	387768409	387769049	1	387763665	-4743
MLOC_21654	3H	406464961	406467656	1	406466902	0
MLOC_52238	3H	408002724	408003122	1	408003558	437
MLOC_5989	3H	409543983	409547850	1	409545413	0
MLOC_18850	3H	415271302	415272902	1	415266587	-4714
MLOC_51570	3H	417970191	417978811	1	417970902	0
MLOC_18521	3H	421990592	421995381	2	421990844	0
MLOC_71661	3H	425079135	425080420	1	425080244	0
MLOC_78915	3H	425835937	425838809	1	425833374	-2562
MLOC_5176	3H	426474789	426478467	1	426476574	0
MLOC_60568	3H	427500578	427503157	1	427501373	0
MLOC_15525	3H	428734227	428738488	1	428739359	872
MLOC_71790	3H	429116021	429119468	1	429111178	-4842
MLOC_41312	3H	429456489	429458092	1	429457919	0
MLOC_66675	3H	430759485	430761479	1	430760360	0
MLOC_10045	3H	433525660	433527187	1	433524347	-1312
MLOC_36688	3H	433578757	433580016	1	433581255	1240
MLOC_7220	3H	433603127	433603850	1	433603281	0
MLOC_3412	3H	437635691	437642748	1	437636071	0
MLOC_44140	3H	438148075	438152375	1	438144520	-3554
MLOC_56556	3H	444356780	444359774	1	444358741	0
MLOC_64416	3H	445455478	445457947	1	445450560	-4917
MLOC_8179	3H	449427664	449430713	1	449429056	0
MLOC_60520	3H	451692147	451696625	1	451697724	1100
MLOC_74286	3H	451709539	451715963	1	451713317	0
MLOC_4568	3H	451798939	451807707	2	451799730	0
MLOC_71105	3H	451831787	451835675	1	451831906	0
MLOC_22921	3H	453491359	453493053	1	453492795	0
MLOC_66576	3H	453523877	453526089	1	453526471	383
MLOC_4319	3H	454410808	454413883	1	454414304	422
MLOC_14106	3H	465691639	465694001	1	465696968	2968
MLOC_44399	3H	465811809	465813820	1	465812440	0
MLOC_16313	3H	466249968	466256652	1	466254802	0
MLOC_62364	3H	466900249	466901630	1	466901006	0
MLOC_61584	3H	470400128	470402336	1	470405835	3500
MLOC_66713	3H	471092409	471095757	1	471088972	-3436
MLOC_6964	3H	471496887	471500120	1	471497845	0
MLOC_212	3H	477852165	477855384	1	477854464	0
MLOC_68397	3H	483576080	483578627	1	483581181	2555
MLOC_65998	3H	484405517	484417950	1	484408087	0
MLOC_9835	3H	486798699	486801199	1	486795114	-3584
MLOC_56115	3H	486946978	486951618	1	486948384	0
MLOC_13043	3H	486989475	486992824	1	486989707	0
MLOC_12015	3H	489672625	489678295	1	489672822	0
MLOC_37536	3H	489714476	489716285	1	489712724	-1751
MLOC_81053	3H	495594431	495598377	1	495597782	0
MLOC_72334	3H	495606474	495609466	1	495610769	1304
MLOC_56571	3H	498921013	498923286	1	498921718	0
MLOC_67844	3H	499482756	499487011	1	499484400	0
MLOC_14349	3H	499801415	499803351	1	499800375	-1039
MLOC_11357	3H	502233042	502235839	1	502231583	-1458
MLOC_19	3H	503679770	503683947	2	503679973	0
MLOC_68802	3H	505241021	505244729	1	505239481	-1539
MLOC_37882	3H	505259027	505266276	1	505258245	-781
MLOC_66113	3H	507811806	507818643	1	507821904	3262
MLOC_62662	3H	507845528	507848723	1	507847164	0
MLOC_7311	3H	509079117	509083316	1	509080041	0
MLOC_59162	3H	509106587	509108844	1	509106574	-12
MLOC_17029	3H	510878903	510881202	1	510885161	3960
MLOC_61028	3H	511682098	511685909	1	511682440	0
MLOC_8435	3H	511756912	511758243	1	511755047	-1864
MLOC_14441	3H	516382693	516386877	1	516383617	0
MLOC_37766	3H	516387777	516391212	1	516394302	3091
MLOC_55962	3H	516860633	516872111	1	516859173	-1459
MLOC_4394	3H	516936117	516943807	1	516934076	-2040
MLOC_17938	3H	517023979	517028810	1	517020167	-3811
MLOC_77090	3H	522328055	522331166	1	522331603	438
MLOC_16818	3H	525411952	525413245	1	525412644	0
MLOC_76930	3H	526665517	526669289	1	526666761	0
MLOC_38564	3H	526770827	526774373	1	526768965	-1861
MLOC_67327	3H	529662448	529664680	1	529663463	0
MLOC_67327	3H	529662448	529664680	1	529664240	0
MLOC_78412	3H	537550358	537553344	1	537558169	4826
MLOC_37244	3H	541200338	541212504	1	541200969	0
MLOC_12195	3H	541376061	541383993	1	541377636	0
MLOC_60634	3H	542859144	542860817	1	542855057	-4086
MLOC_10574	3H	544089709	544095830	1	544099234	3405
MLOC_75894	3H	544942290	544943217	1	544946115	2899
MLOC_65217	3H	546452669	546454345	1	546453084	0
MLOC_64100	3H	546721430	546724796	1	546723315	0
MLOC_52165	3H	547322971	547329133	1	547323208	0
MLOC_74792	3H	550751426	550754015	1	550752044	0
MLOC_70800	3H	555469994	555472484	1	555475815	3332
MLOC_57410	3H	557258936	557264308	1	557257188	-1747
MLOC_80947	3H	557795697	557797723	1	557796897	0
MLOC_40366	3H	558405260	558406904	1	558402245	-3014
MLOC_59531	3H	558644420	558647962	1	558644726	0
MLOC_44235	3H	558950468	558952729	1	558951252	0
MLOC_29874	3H	559117003	559118642	1	559116158	-844
MLOC_18976	3H	559322573	559324307	1	559323140	0
MLOC_52274	4H	22706	24645	1	25541	897
MLOC_74291	4H	559190	563671	1	559464	0
MLOC_53826	4H	6035042	6038029	1	6030675	-4366
MLOC_52962	4H	6262011	6266097	1	6268512	2416
MLOC_52920	4H	8001436	8007735	1	8007191	0
MLOC_37374	4H	8068251	8073527	1	8063681	-4569
MLOC_58415	4H	8267632	8269217	1	8267387	-244
MLOC_43949	4H	8286098	8290717	1	8288628	0
MLOC_55179	4H	8914676	8917838	1	8912546	-2129
MLOC_52290	4H	8974411	8979042	1	8974665	0
MLOC_70449	4H	9179500	9184977	1	9184674	0
MLOC_55029	4H	13047850	13054582	1	13052332	0
MLOC_54942	4H	19513468	19518484	1	19520030	1547
MLOC_61764	4H	23410944	23418296	1	23408620	-2323
MLOC_16284	4H	23590509	23592268	1	23590808	0
MLOC_54654	4H	24690943	24696038	1	24694849	0
MLOC_72162	4H	24749643	24753501	1	24750715	0
MLOC_57218	4H	27537013	27539733	1	27537187	0
MLOC_78893	4H	33062349	33064929	1	33063149	0
MLOC_78895	4H	33071252	33073234	1	33070392	-859
MLOC_6473	4H	43652111	43659474	2	43653803	0
MLOC_56220	4H	132717036	132718500	1	132716584	-451
MLOC_58278	4H	133120892	133123292	1	133125256	1965
MLOC_57476	4H	133400542	133407804	2	133405040	0
MLOC_11626	4H	134755615	134756676	1	134756837	162
MLOC_34388	4H	135202146	135207417	1	135200747	-1398
MLOC_75356	4H	137048183	137048975	1	137049037	63
MLOC_57385	4H	138407503	138410242	1	138409019	0
MLOC_15936	4H	139175726	139176845	1	139175608	-117
MLOC_11045	4H	195906685	195913668	1	195902443	-4241
MLOC_64812	4H	197430344	197435305	1	197432134	0
MLOC_17680	4H	197596191	197603161	1	197599348	0
MLOC_17680	4H	197596191	197603161	1	197599517	0
MLOC_51166	4H	202332118	202337044	1	202332138	0
MLOC_51166	4H	202332118	202337044	1	202335824	0
MLOC_45357	4H	207526112	207527020	1	207526790	0
MLOC_74448	4H	218113775	218117992	1	218117672	0
MLOC_53110	4H	241923124	241928436	1	241928106	0
MLOC_57352	4H	241953105	241965922	1	241957433	0
MLOC_30598	4H	242315013	242322191	1	242316109	0
MLOC_72579	4H	243764428	243766113	1	243765412	0
MLOC_65101	4H	243961733	243964197	1	243965631	1435
MLOC_7062	4H	244436401	244440723	1	244441616	894
MLOC_4623	4H	244637959	244640818	1	244638287	0
MLOC_52019	4H	244727520	244730369	1	244730125	0
MLOC_75724	4H	244817423	244819731	1	244818024	0
MLOC_4530	4H	245905496	245909465	1	245906014	0
MLOC_6489	4H	248432191	248434111	1	248433133	0
MLOC_60449	4H	251497502	251500735	1	251498247	0
MLOC_39183	4H	253291250	253293308	1	253289837	-1412
MLOC_62796	4H	254382637	254383690	1	254382597	-39
MLOC_73489	4H	306652412	306653754	1	306653208	0
MLOC_4685	4H	320165145	320173012	1	320172685	0
MLOC_61490	4H	334669092	334673445	1	334670233	0
MLOC_9793	4H	347923623	347930510	1	347923949	0
MLOC_53725	4H	354078990	354084361	1	354079517	0
MLOC_62568	4H	358259572	358262587	1	358263670	1084
MLOC_55254	4H	358315084	358316362	1	358315334	0
MLOC_52202	4H	368994261	368996465	2	368996527	63
MLOC_11868	4H	400252339	400255767	1	400253814	0
MLOC_10879	4H	400451376	400454411	1	400455432	1022
MLOC_7514	4H	400517259	400518962	1	400519606	645
MLOC_5636	4H	402816315	402825645	1	402825795	151
MLOC_22492	4H	417667144	417668205	1	417667448	0
MLOC_36550	4H	419132829	419136212	1	419132899	0
MLOC_59692	4H	428163378	428168824	1	428163732	0
MLOC_52907	4H	428185287	428191303	1	428186108	0
MLOC_69872	4H	429557240	429558476	1	429555681	-1558
MLOC_20110	4H	430811500	430813943	1	430815344	1402
MLOC_58529	4H	434412007	434420645	1	434412213	0
MLOC_74490	4H	434536708	434539598	1	434539300	0
MLOC_53519	4H	436059329	436065023	1	436059667	0
MLOC_64018	4H	436178292	436181955	1	436177417	-874
MLOC_10221	4H	441077259	441081485	1	441079433	0
MLOC_33875	4H	445702111	445704512	1	445708910	4399
MLOC_36871	4H	449538200	449542114	1	449544834	2721
MLOC_66482	4H	451399918	451404018	1	451400028	0
MLOC_68522	4H	467894767	467900720	1	467905098	4379
MLOC_67886	4H	468748181	468750116	1	468748463	0
MLOC_8033	4H	473779456	473781042	1	473780379	0
MLOC_13691	4H	474291678	474295333	1	474292497	0
MLOC_55435	4H	474494507	474500770	1	474498628	0
MLOC_13473	4H	474534766	474539547	1	474539333	0
MLOC_7265	4H	482303978	482305458	1	482304922	0
MLOC_60842	4H	488644210	488648721	1	488648113	0
MLOC_4280	4H	489015119	489019602	1	489011167	-3951
MLOC_73460	4H	492092295	492093801	1	492093170	0
MLOC_14895	4H	495970049	495972518	1	495970945	0
MLOC_6253	4H	498855436	498858253	1	498861611	3359
MLOC_56486	4H	499112411	499114603	1	499119601	4999
MLOC_75508	4H	499161612	499165155	1	499167631	2477
MLOC_14370	4H	499174136	499178027	1	499170668	-3467
MLOC_59792	4H	501068988	501073393	1	501071322	0
MLOC_37997	4H	501476063	501480295	1	501477402	0
MLOC_6748	4H	501551675	501553906	1	501552343	0
MLOC_17089	4H	501878175	501879781	1	501884126	4346
MLOC_73542	4H	501888673	501891252	1	501891594	343
MLOC_38677	4H	503176622	503177597	1	503178521	925
MLOC_34629	4H	503191134	503192748	1	503193388	641
MLOC_54104	4H	503331944	503336678	1	503332732	0
MLOC_13505	4H	503673578	503675350	1	503674785	0
MLOC_59388	4H	503706066	503707049	1	503705651	-414
MLOC_10702	4H	504306441	504311676	1	504306690	0
MLOC_73533	4H	510241457	510243075	1	510239905	-1551
MLOC_57884	4H	513614554	513617239	1	513612446	-2107
MLOC_76546	4H	521091729	521095270	1	521091643	-85
MLOC_68937	4H	521613732	521623105	1	521614326	0
MLOC_556	4H	522737807	522739430	1	522742977	3548
MLOC_4875	4H	525570437	525572302	1	525565825	-4611
MLOC_66787	4H	531040543	531044581	1	531040756	0
MLOC_18334	4H	531599231	531601383	1	531595891	-3339
MLOC_54001	4H	533355597	533359808	1	533356578	0
MLOC_50290	4H	533387398	533393023	1	533395333	2311
MLOC_52820	4H	536631445	536634133	1	536634654	522
MLOC_70757	4H	536917443	536917936	1	536916942	-500
MLOC_68121	5H	4130463	4132693	1	4129433	-1029
MLOC_67937	5H	5296501	5300555	1	5296642	0
MLOC_62076	5H	6297312	6301570	1	6300979	0
MLOC_54463	5H	8126678	8130100	1	8126978	0
MLOC_54463	5H	8126678	8130100	1	8127212	0
MLOC_69766	5H	14595827	14597949	1	14600714	2766
MLOC_53961	5H	22687613	22690441	1	22687717	0
MLOC_69176	5H	24126881	24129556	1	24125039	-1841
MLOC_5116	5H	24141054	24149960	2	24149700	0
MLOC_10278	5H	24151693	24155257	1	24152225	0
MLOC_10435	5H	28649266	28656055	1	28649230	-35
MLOC_15954	5H	34939816	34946589	1	34938263	-1552
MLOC_59947	5H	46298025	46301828	1	46296350	-1674
MLOC_10497	5H	60729648	60734990	1	60733948	0
MLOC_61230	5H	66693624	66699299	1	66693816	0
MLOC_67833	5H	69549165	69549689	1	69548505	-659
MLOC_19453	5H	75131246	75135299	2	75135072	0
MLOC_5444	5H	75369491	75377858	1	75369700	0
MLOC_62808	5H	83013988	83019244	1	83011949	-2038
MLOC_63764	5H	83504035	83508589	1	83512466	3878
MLOC_37775	5H	83537327	83541153	1	83538831	0
MLOC_4554	5H	83779552	83783462	1	83779803	0
MLOC_51368	5H	84206817	84209987	1	84209945	0
MLOC_46621	5H	97050973	97051527	1	97055363	3837
MLOC_15026	5H	105716336	105719751	1	105724284	4534
MLOC_64988	5H	106445194	106449178	1	106450096	919
MLOC_59310	5H	106797172	106799366	1	106797767	0
MLOC_59310	5H	106797172	106799366	1	106798069	0
MLOC_63186	5H	107889998	107892543	1	107890574	0
MLOC_5746	5H	108656213	108659349	1	108664204	4856
MLOC_38921	5H	109059082	109063983	1	109065226	1244
MLOC_57143	5H	111532728	111533641	1	111533921	281
MLOC_80445	5H	117126236	117130801	1	117127232	0
MLOC_66405	5H	120218659	120221773	1	120219040	0
MLOC_59570	5H	121800932	121806834	1	121797928	-3003
MLOC_7503	5H	134831585	134833744	1	134836623	2880
MLOC_64944	5H	139742417	139744870	1	139743676	0
MLOC_21560	5H	263661148	263667423	1	263671904	4482
MLOC_12012	5H	285685547	285686797	1	285687672	876
MLOC_11793	5H	315376974	315378257	1	315378451	195
MLOC_61378	5H	327633794	327644718	1	327630913	-2880
MLOC_31879	5H	341807295	341807557	1	341809350	1794
MLOC_60900	5H	359926238	359932046	1	359926598	0
MLOC_3895	5H	360118145	360124382	1	360124168	0
MLOC_49094	5H	360464832	360466620	1	360462892	-1939
MLOC_9811	5H	360568564	360571204	1	360567787	-776
MLOC_50985	5H	365099443	365100533	1	365099022	-420
MLOC_58165	5H	368051510	368053428	1	368051063	-446
MLOC_13051	5H	375488044	375493255	1	375488510	0
MLOC_24477	5H	385714267	385717777	1	385713473	-793
MLOC_52105	5H	387070405	387072794	1	387069800	-604
MLOC_65201	5H	388738393	388740242	1	388745221	4980
MLOC_62865	5H	390012708	390016476	1	390015830	0
MLOC_4223	5H	400153459	400154487	1	400154249	0
MLOC_37419	5H	400792040	400793860	1	400797262	3403
MLOC_4945	5H	405825363	405827083	1	405826052	0
MLOC_71651	5H	412968559	412970414	1	412967017	-1541
MLOC_20078	5H	413534154	413535479	1	413534963	0
MLOC_22183	5H	419333831	419340928	1	419334487	0
MLOC_54650	5H	421243180	421250482	1	421247574	0
MLOC_55926	5H	421274010	421275753	1	421270045	-3964
MLOC_59368	5H	421568104	421571735	1	421574694	2960
MLOC_20338	5H	421988829	421990362	1	421990048	0
MLOC_1969	5H	430842472	430842834	1	430840019	-2452
MLOC_3587	5H	430936401	430940224	1	430934423	-1977
MLOC_52013	5H	431377460	431381871	1	431372808	-4651
MLOC_60048	5H	434618163	434621331	1	434618363	0
MLOC_40019	5H	437577716	437578600	1	437578301	0
MLOC_6132	5H	443204272	443208192	1	443204612	0
MLOC_58633	5H	443436645	443438312	1	443434682	-1962
MLOC_64970	5H	443643088	443643558	1	443640875	-2212
MLOC_63505	5H	445079754	445084228	1	445080390	0
MLOC_66740	5H	449547966	449551214	1	449548609	0
MLOC_55270	5H	450634280	450637593	1	450637558	0
MLOC_12950	5H	456807113	456810787	1	456807155	0
MLOC_62008	5H	456837342	456841728	1	456841482	0
MLOC_64875	5H	460702022	460702394	1	460697062	-4959
MLOC_11733	5H	460851774	460853951	1	460852093	0
MLOC_7783	5H	464180952	464185088	1	464188759	3672
MLOC_69710	5H	469826020	469827831	1	469827337	0
MLOC_52879	5H	469878063	469884006	1	469886180	2175
MLOC_1996	5H	470797412	470801017	1	470797639	0
MLOC_70314	5H	472269147	472269794	1	472269931	138
MLOC_72144	5H	472419543	472422614	1	472421711	0
MLOC_5125	5H	475662478	475666168	1	475662537	0
MLOC_50844	5H	481274955	481276499	1	481272044	-2910
MLOC_16558	5H	483228628	483232202	1	483231319	0
MLOC_74974	5H	483638847	483645340	1	483644874	0
MLOC_32910	5H	484112052	484113982	1	484115196	1215
MLOC_73139	5H	484200490	484206155	1	484200778	0
MLOC_65340	5H	484716709	484720180	2	484719192	0
MLOC_56087	5H	484844004	484847289	1	484847737	449
MLOC_8260	5H	485032887	485033860	1	485033175	0
MLOC_67933	5H	485993318	485997628	1	485996319	0
MLOC_50968	5H	486131265	486133992	1	486132169	0
MLOC_50968	5H	486131265	486133992	1	486132418	0
MLOC_50968	5H	486131265	486133992	1	486133639	0
MLOC_7175	5H	486159588	486160205	1	486159388	-199
MLOC_24602	5H	486703115	486707935	1	486703486	0
MLOC_3906	5H	491795995	491798617	1	491798017	0
MLOC_56604	5H	492370417	492376942	2	492375505	0
MLOC_52949	5H	496740274	496742064	1	496741052	0
MLOC_66913	5H	497399887	497403382	1	497401419	0
MLOC_80549	5H	497656969	497661914	1	497661380	0
MLOC_34938	5H	498946403	498951282	1	498953864	2583
MLOC_43923	5H	502578838	502582664	1	502580842	0
MLOC_71946	5H	504101900	504102315	1	504101938	0
MLOC_44070	5H	505428196	505431949	1	505424691	-3504
MLOC_21153	5H	505697183	505699185	1	505699044	0
MLOC_67384	5H	505704191	505708842	1	505705513	0
MLOC_14114	5H	506588992	506592899	1	506587532	-1459
MLOC_15202	5H	515891712	515895639	1	515895225	0
MLOC_63574	5H	517430958	517438069	2	517431176	0
MLOC_56508	5H	517441853	517449530	1	517453839	4310
MLOC_38262	5H	518526056	518528197	1	518526886	0
MLOC_17150	5H	524053360	524057002	1	524051104	-2255
MLOC_79335	5H	524071605	524074395	1	524071808	0
MLOC_37586	5H	524227373	524238921	1	524234215	0
MLOC_63011	5H	524249577	524254534	1	524253549	0
MLOC_56327	5H	524363175	524365800	1	524365443	0
MLOC_79669	5H	524593186	524594115	1	524590581	-2604
MLOC_44134	5H	526245877	526250042	1	526250409	368
MLOC_16017	5H	530452500	530456007	2	530455141	0
MLOC_37104	5H	532180436	532182278	1	532178169	-2266
MLOC_57715	5H	536752926	536763499	1	536749382	-3543
MLOC_14456	5H	536824011	536825017	1	536824025	0
MLOC_73656	5H	536838536	536839602	1	536844461	4860
MLOC_10450	5H	536892909	536897697	2	536894717	0
MLOC_67899	5H	536946625	536948729	1	536953563	4835
MLOC_73050	5H	537068270	537069238	1	537068813	0
MLOC_15378	5H	539181609	539183142	1	539183502	361
MLOC_63062	5H	539639501	539644220	1	539640429	0
MLOC_17791	5H	540742794	540743465	1	540746200	2736
MLOC_6888	5H	541343720	541344780	1	541348871	4092
MLOC_62583	5H	542611389	542611657	1	542614093	2437
MLOC_7845	5H	543117973	543119123	1	543122174	3052
MLOC_14346	5H	543590541	543593048	1	543592791	0
MLOC_61963	5H	551185170	551186122	1	551186238	117
MLOC_65890	5H	551332972	551334524	1	551330917	-2054
MLOC_55856	5H	555937187	555938144	1	555939444	1301
MLOC_37020	5H	559118152	559123722	1	559126399	2678
MLOC_20862	6H	4501008	4502191	1	4503557	1367
MLOC_54256	6H	5471445	5478433	1	5475847	0
MLOC_11348	6H	10970745	10973866	1	10978555	4690
MLOC_44788	6H	13915484	13917985	1	13915558	0
MLOC_26551	6H	14280208	14282827	1	14283873	1047
MLOC_58310	6H	16808569	16809409	1	16813045	3637
MLOC_16674	6H	16969375	16970044	1	16968719	-655
MLOC_9975	6H	17500561	17504699	1	17500726	0
MLOC_65683	6H	18029108	18030818	1	18029215	0
MLOC_65683	6H	18029108	18030818	1	18029354	0
MLOC_17604	6H	19950367	19951313	1	19952213	901
MLOC_7105	6H	20709205	20712146	1	20709555	0
MLOC_74007	6H	24887659	24891092	1	24887906	0
MLOC_74007	6H	24887659	24891092	1	24890436	0
MLOC_65175	6H	29096932	29098451	1	29097988	0
MLOC_14316	6H	33101714	33103905	1	33100692	-1021
MLOC_36821	6H	43813492	43816567	1	43813310	-181
MLOC_56651	6H	52168022	52171130	1	52167300	-721
MLOC_15015	6H	52352781	52359153	1	52363567	4415
MLOC_55776	6H	61883063	61885795	1	61885638	0
MLOC_43168	6H	62479782	62482928	1	62479909	0
MLOC_13936	6H	62609292	62612562	1	62612364	0
MLOC_22850	6H	62869551	62870101	1	62872807	2707
MLOC_53689	6H	63038650	63040020	1	63039001	0
MLOC_37707	6H	64422843	64425161	1	64420170	-2672
MLOC_11882	6H	69839185	69846687	1	69839743	0
MLOC_15650	6H	84697419	84702422	1	84697715	0
MLOC_37916	6H	101288008	101292221	1	101286014	-1993
MLOC_71992	6H	108726609	108731440	1	108730748	0
MLOC_61870	6H	112251138	112256220	1	112251166	0
MLOC_62426	6H	120568745	120572908	1	120569314	0
MLOC_73208	6H	120713232	120718578	1	120717488	0
MLOC_11414	6H	120766921	120768513	1	120764500	-2420
MLOC_66152	6H	124383735	124387564	1	124383223	-511
MLOC_30789	6H	158182345	158190477	2	158189252	0
MLOC_72300	6H	167316226	167319640	1	167317573	0
MLOC_67722	6H	167808340	167812010	1	167808888	0
MLOC_10343	6H	168668760	168670049	1	168674114	4066
MLOC_27387	6H	172355103	172355822	1	172355095	-7
MLOC_71421	6H	192246267	192251411	1	192249752	0
MLOC_59102	6H	229140501	229147234	1	229146399	0
MLOC_12967	6H	245558178	245563564	1	245558448	0
MLOC_37719	6H	245958355	245961465	1	245960614	0
MLOC_7517	6H	247447044	247450630	1	247448194	0
MLOC_7517	6H	247447044	247450630	1	247448271	0
MLOC_14167	6H	258898716	258901548	1	258898863	0
MLOC_8081	6H	260635115	260638978	1	260631955	-3159
MLOC_14606	6H	267871502	267874014	1	267873083	0
MLOC_46804	6H	270833782	270834270	1	270838696	4427
MLOC_6818	6H	273474411	273480817	1	273482448	1632
MLOC_78793	6H	274620305	274623392	1	274622490	0
MLOC_67386	6H	282348491	282351455	1	282352325	871
MLOC_71278	6H	299416977	299418247	1	299421236	2990
MLOC_11331	6H	358650249	358651753	1	358650360	0
MLOC_81895	6H	358663358	358664583	1	358664313	0
MLOC_15274	6H	364903344	364909552	1	364905891	0
MLOC_10290	6H	364927695	364929232	1	364928105	0
MLOC_63586	6H	366154400	366159390	1	366157650	0
MLOC_61035	6H	375090985	375092678	1	375090653	-331
MLOC_3095	6H	375464871	375466310	1	375461615	-3255
MLOC_75601	6H	375685036	375686500	1	375685068	0
MLOC_78405	6H	380889503	380891633	1	380891169	0
MLOC_74491	6H	385858538	385862101	1	385859015	0
MLOC_14502	6H	408106542	408109399	1	408108115	0
MLOC_43989	6H	412872293	412874849	1	412875579	731
MLOC_56208	6H	426654019	426655994	1	426655854	0
MLOC_64446	6H	431139954	431144328	1	431135533	-4420
MLOC_45051	6H	431318544	431320508	1	431317956	-587
MLOC_44046	6H	437876332	437878382	1	437877882	0
MLOC_57313	6H	448617810	448624474	1	448618186	0
MLOC_55832	6H	448662079	448668127	1	448659365	-2713
MLOC_53492	6H	448776686	448783509	1	448781500	0
MLOC_58678	6H	448968381	448972394	1	448968972	0
MLOC_16328	6H	451173021	451177572	1	451173519	0
MLOC_62775	6H	455947562	455952944	1	455944332	-3229
MLOC_9883	6H	461727935	461731873	1	461728712	0
MLOC_62913	6H	464524953	464531450	2	464528502	0
MLOC_78551	6H	468809546	468810319	1	468807045	-2500
MLOC_65264	6H	470615924	470619272	1	470621312	2041
MLOC_13074	6H	471121923	471127862	1	471126722	0
MLOC_55989	6H	471174735	471176979	1	471175385	0
MLOC_17713	6H	471575146	471576746	1	471576242	0
MLOC_34772	6H	473423100	473426379	1	473423347	0
MLOC_12436	6H	474862598	474870544	1	474873803	3260
MLOC_4372	6H	475004656	475008055	1	475004657	0
MLOC_6521	6H	476044544	476046995	1	476046814	0
MLOC_15950	6H	477685081	477687225	1	477684495	-585
MLOC_70556	6H	477699024	477702239	1	477700551	0
MLOC_52133	6H	494992528	494994291	1	494999273	4983
MLOC_54272	6H	498264499	498266389	1	498264826	0
MLOC_60775	6H	504507832	504509838	1	504509079	0
MLOC_67417	6H	504533015	504535007	1	504533914	0
MLOC_37294	6H	508163366	508165696	1	508170508	4813
MLOC_19965	6H	508431887	508435351	1	508431903	0
MLOC_55366	6H	508798251	508805071	1	508796364	-1886
MLOC_71919	6H	508817623	508818271	1	508817919	0
MLOC_62200	6H	508886676	508894419	1	508895516	1098
MLOC_5034	6H	508931214	508936397	1	508932834	0
MLOC_73443	6H	509279498	509288981	1	509276021	-3476
MLOC_37802	6H	512671553	512674406	1	512671816	0
MLOC_4445	6H	513366823	513369046	1	513368060	0
MLOC_62538	6H	517294745	517297544	1	517297770	227
MLOC_72414	6H	518329443	518333357	1	518329677	0
MLOC_5271	6H	519623842	519626728	1	519622714	-1127
MLOC_62482	6H	521772014	521773941	1	521773128	0
MLOC_53953	6H	522640171	522646853	1	522649636	2784
MLOC_69827	6H	522663115	522665208	1	522663820	0
MLOC_57119	6H	524068826	524075248	1	524065455	-3370
MLOC_51499	6H	526060608	526064467	1	526062367	0
MLOC_71534	6H	526121162	526124944	1	526121703	0
MLOC_67477	6H	529041251	529045366	1	529049956	4591
MLOC_59864	6H	529189986	529196148	1	529190106	0
MLOC_22334	6H	529444916	529447611	1	529441931	-2984
MLOC_37672	6H	529918100	529922113	1	529925016	2904
MLOC_36333	6H	530019529	530023303	1	530019819	0
MLOC_6294	6H	531123758	531125475	1	531123128	-629
MLOC_34638	6H	531395868	531397590	1	531397892	303
MLOC_73711	6H	532896709	532900336	1	532900009	0
MLOC_18145	6H	532963492	532965913	1	532965400	0
MLOC_53086	7H	2016492	2022883	1	2018853	0
MLOC_44164	7H	4697378	4701694	1	4692593	-4784
MLOC_78490	7H	5182341	5183934	1	5178584	-3756
MLOC_10643	7H	5279259	5284593	1	5283908	0
MLOC_64771	7H	10618715	10623972	1	10621035	0
MLOC_5335	7H	13155189	13160046	1	13159318	0
MLOC_69970	7H	13209176	13213837	1	13211420	0
MLOC_31327	7H	13786196	13787196	1	13791497	4302
MLOC_59782	7H	15559659	15561825	1	15557582	-2076
MLOC_23483	7H	16319087	16320103	1	16319377	0
MLOC_15776	7H	16492641	16495897	1	16495616	0
MLOC_57831	7H	21280377	21284473	1	21283409	0
MLOC_12526	7H	27622910	27628483	1	27623280	0
MLOC_11586	7H	27629077	27632126	1	27629105	0
MLOC_17558	7H	35535636	35537494	1	35536261	0
MLOC_38011	7H	37721665	37723952	1	37727835	3884
MLOC_48956	7H	40846177	40850721	1	40846732	0
MLOC_36691	7H	41149476	41153731	1	41151677	0
MLOC_57450	7H	41383833	41387546	1	41379661	-4171
MLOC_70501	7H	45409101	45415832	1	45414935	0
MLOC_10452	7H	50359153	50362567	1	50362343	0
MLOC_74942	7H	58995829	58998118	1	58999542	1425
MLOC_19897	7H	60842027	60844991	1	60842931	0
MLOC_6659	7H	61968552	61974873	1	61971518	0
MLOC_75369	7H	61982603	61987972	1	61984080	0
MLOC_9943	7H	64820794	64825489	1	64824771	0
MLOC_34384	7H	65471495	65474324	1	65471980	0
MLOC_61879	7H	66436716	66443614	1	66443123	0
MLOC_61879	7H	66436716	66443614	1	66443482	0
MLOC_18813	7H	66540153	66544369	1	66540257	0
MLOC_68568	7H	66861646	66862622	1	66857464	-4181
MLOC_4525	7H	66917589	66922120	1	66922554	435
MLOC_55820	7H	74538591	74544886	2	74540790	0
MLOC_11770	7H	75976522	75983386	1	75982828	0
MLOC_70662	7H	88662443	88663597	1	88663193	0
MLOC_70612	7H	90428203	90432110	1	90428390	0
MLOC_70612	7H	90428203	90432110	1	90430438	0
MLOC_36491	7H	93217958	93223440	1	93213053	-4904
MLOC_37394	7H	93272034	93276297	1	93280198	3902
MLOC_36488	7H	96048516	96050475	1	96049134	0
MLOC_44595	7H	96055767	96057311	1	96060926	3616
MLOC_4200	7H	96785597	96798624	1	96795385	0
MLOC_57956	7H	96808241	96811459	1	96812057	599
MLOC_76431	7H	96912660	96915957	1	96913746	0
MLOC_52217	7H	108182631	108184730	1	108183287	0
MLOC_68525	7H	117490797	117495160	1	117493533	0
MLOC_65749	7H	117906286	117912138	1	117906867	0
MLOC_76929	7H	120195012	120195998	1	120192428	-2583
MLOC_66504	7H	121307117	121309514	1	121306381	-735
MLOC_68085	7H	121759512	121766431	1	121760141	0
MLOC_58762	7H	126192717	126197362	1	126192799	0
MLOC_11310	7H	129223065	129233473	1	129230606	0
MLOC_80715	7H	145066540	145073305	1	145068157	0
MLOC_65210	7H	145261866	145263182	1	145266561	3380
MLOC_11852	7H	145504403	145507847	1	145505055	0
MLOC_55353	7H	150552438	150556423	1	150559720	3298
MLOC_3522	7H	158335918	158341174	1	158337262	0
MLOC_65319	7H	158378976	158387063	2	158382351	0
MLOC_55934	7H	163090891	163100091	2	163091692	0
MLOC_37174	7H	163358630	163364922	1	163361920	0
MLOC_59487	7H	166604143	166608534	1	166601839	-2303
MLOC_22078	7H	169969743	169970419	1	169974485	4067
MLOC_61671	7H	177002905	177008886	1	177011549	2664
MLOC_37511	7H	178619919	178621404	1	178621087	0
MLOC_80651	7H	188979777	188983841	1	188980264	0
MLOC_37400	7H	189059795	189064955	1	189068573	3619
MLOC_36587	7H	227993016	227996967	1	227997654	688
MLOC_14837	7H	236986734	236988705	1	236987400	0
MLOC_30473	7H	247464384	247465136	1	247470054	4919
MLOC_61294	7H	250186895	250192332	1	250190226	0
MLOC_75223	7H	250375570	250379022	1	250378584	0
MLOC_19597	7H	250718984	250722900	1	250719261	0
MLOC_79756	7H	251354661	251359753	1	251357283	0
MLOC_61676	7H	251745928	251748772	1	251750977	2206
MLOC_5438	7H	254118579	254124470	1	254124985	516
MLOC_80267	7H	254779583	254783172	1	254780326	0
MLOC_16981	7H	255912248	255914884	1	255912894	0
MLOC_44424	7H	258537503	258538738	1	258537691	0
MLOC_22247	7H	259469798	259472465	1	259469943	0
MLOC_13664	7H	261361767	261365329	1	261361762	-4
MLOC_34010	7H	262217631	262218518	1	262217778	0
MLOC_66195	7H	290726117	290734101	2	290732057	0
MLOC_66195	7H	290726117	290734101	2	290733802	0
MLOC_53973	7H	306457999	306460230	1	306455300	-2698
MLOC_21142	7H	310578195	310582774	1	310584693	1920
MLOC_16847	7H	316243354	316245268	1	316239501	-3852
MLOC_37782	7H	316343047	316344574	1	316345574	1001
MLOC_64012	7H	331235246	331241812	1	331232187	-3058
MLOC_51438	7H	331452083	331455759	1	331452849	0
MLOC_63698	7H	331851440	331856501	1	331851346	-93
MLOC_77741	7H	335122955	335124388	1	335123050	0
MLOC_14118	7H	340760827	340768145	1	340762787	0
MLOC_68423	7H	343439229	343441149	1	343436675	-2553
MLOC_3849	7H	408258795	408261123	1	408258848	0
MLOC_18322	7H	420072443	420075047	1	420074073	0
MLOC_76567	7H	437806080	437814225	1	437806950	0
MLOC_74271	7H	438046248	438048125	1	438048688	564
MLOC_72767	7H	440064807	440068087	1	440065454	0
MLOC_28602	7H	442786870	442790526	1	442794333	3808
MLOC_51241	7H	442842724	442848372	1	442850515	2144
MLOC_65378	7H	456029928	456032348	1	456031870	0
MLOC_36408	7H	457077470	457079349	1	457075239	-2230
MLOC_66396	7H	457127111	457135950	1	457134430	0
MLOC_30192	7H	457345386	457353207	1	457352897	0
MLOC_73856	7H	457487122	457491581	1	457487818	0
MLOC_17556	7H	467418125	467419584	1	467422581	2998
MLOC_23451	7H	470008610	470010863	1	470008261	-348
MLOC_51943	7H	471787771	471788882	1	471788693	0
MLOC_69996	7H	492424900	492426829	1	492427775	947
MLOC_75597	7H	494037409	494038357	1	494041729	3373
MLOC_53682	7H	494620713	494625341	1	494620877	0
MLOC_64231	7H	511448810	511450265	1	511449663	0
MLOC_17343	7H	515349267	515358237	1	515349282	0
MLOC_17343	7H	515349267	515358237	1	515349890	0
MLOC_80739	7H	518313587	518316389	1	518314151	0
MLOC_37135	7H	520384062	520386597	1	520384321	0
MLOC_39570	7H	520475673	520479187	1	520475716	0
MLOC_43986	7H	525609341	525611717	1	525611240	0
MLOC_44404	7H	529557338	529561673	1	529554703	-2634
MLOC_63193	7H	533232921	533238410	1	533234377	0
MLOC_63236	7H	533268411	533271606	1	533269177	0
MLOC_74469	7H	533292711	533293985	1	533293571	0
MLOC_12047	7H	535586511	535587936	1	535588741	806
MLOC_670	7H	535862612	535865455	1	535858948	-3663
MLOC_68827	7H	536113471	536114248	1	536113245	-225
MLOC_31761	7H	539076202	539078824	1	539078933	110
MLOC_64811	7H	539603577	539607660	1	539607291	0
MLOC_80835	7H	540767429	540772431	1	540770319	0
MLOC_57264	7H	541184118	541188748	1	541192308	3561
MLOC_39738	7H	544501261	544505391	1	544501902	0
MLOC_69988	7H	545375651	545378650	1	545378403	0
MLOC_6897	7H	547206161	547210338	1	547203035	-3125
MLOC_12949	7H	547255746	547261114	1	547259938	0
MLOC_65985	7H	550978899	550979828	1	550978368	-530
MLOC_58957	7H	557331674	557333556	1	557335859	2304
MLOC_61642	7H	557921161	557930467	1	557921572	0
MLOC_60028	7H	558268304	558272828	1	558277383	4556
MLOC_70708	7H	558279997	558283712	1	558280025	0
MLOC_70708	7H	558279997	558283712	1	558280597	0
MLOC_53856	7H	564540955	564546182	1	564538706	-2248
MLOC_56820	7H	564576692	564580052	1	564577039	0
MLOC_6303	7H	570515234	570518767	1	570520745	1979
MLOC_14604	7H	570613998	570620572	1	570619478	0
MLOC_59749	7H	570621842	570627384	2	570628533	1150
MLOC_18924	7H	570633030	570633838	2	570629099	-3930
MLOC_69364	7H	571104182	571104894	1	571104706	0
MLOC_62970	7H	583930033	583932228	1	583930697	0
MLOC_62970	7H	583930033	583932228	1	583930793	0
MLOC_20490	7H	584131345	584131561	1	584130786	-558
MLOC_62302	7H	584466198	584470659	1	584469075	0
MLOC_16741	7H	585303368	585306180	1	585299387	-3980
MLOC_13779	7H	585718331	585723255	1	585722999	0
MLOC_36840	7H	589470031	589476039	1	589470115	0
MLOC_70403	7H	589670302	589672793	1	589674024	1232
MLOC_43042	7H	589694720	589700484	2	589698321	0
MLOC_64963	7H	589784482	589785321	1	589780720	-3761
MLOC_20036	7H	589824484	589826745	1	589820266	-4217
MLOC_57364	7H	589867247	589867870	1	589871047	3178
MLOC_58753	7H	592830272	592835470	1	592827417	-2854
MLOC_181	7H	593239612	593242262	1	593239977	0
MLOC_67225	7H	595002089	595003255	1	595003940	686
MLOC_51323	7H	599341616	599342597	1	599341936	0
MLOC_71562	7H	599456547	599461711	1	599457073	0
MLOC_80063	7H	599874678	599884436	1	599870189	-4488
MLOC_70877	7H	600003578	600007479	1	600011473	3995

## Sheet: DM_hypergenes_leaves
List of salt-induced differentially hypermethylated genes in leaves
GeneID	Chromosome	start	end	strand	DMM position	Distance to gene (bp)
MLOC_66388	1H	61789592	61795767	1	61791253	0
MLOC_44613	1H	173803808	173809734	1	173808619	0
MLOC_67457	1H	278586662	278591054	1	278588570	0
MLOC_24861	1H	311920667	311921147	1	311918734	-1932
MLOC_52730	1H	398201430	398206694	1	398204886	0
MLOC_68678	1H	398591702	398595289	1	398588585	-3116
MLOC_25903	2H	47641131	47641795	1	47636775	-4355
MLOC_35121	2H	475165254	475165551	1	475164071	-1182
MLOC_5638	2H	493801410	493804512	1	493808566	4055
MLOC_57766	2H	507097997	507102980	1	507101429	0
MLOC_67122	2H	546226492	546235266	1	546233246	0
MLOC_9892	2H	589893976	589903799	1	589892056	-1919
MLOC_52979	3H	8354903	8356276	1	8357368	1093
MLOC_27655	3H	14644486	14645638	1	14648621	2984
MLOC_59356	3H	29988129	29994338	1	29987319	-809
MLOC_67590	3H	55979040	55982667	1	55974764	-4275
MLOC_10721	3H	380442622	380443431	1	380446588	3158
MLOC_69630	3H	557816173	557821109	1	557816080	-92
MLOC_1207	4H	132382514	132384914	1	132387824	2911
MLOC_12946	4H	143563422	143565595	1	143561838	-1583
MLOC_16098	4H	245180561	245184324	1	245182344	0
MLOC_8240	4H	253398947	253401651	1	253404927	3277
MLOC_77166	4H	308784115	308785170	1	308779658	-4456
MLOC_70515	4H	334814316	334815927	1	334819317	3391
MLOC_53070	4H	431800830	431805530	1	431801649	0
MLOC_58529	4H	434412007	434420645	1	434415773	0
MLOC_70888	4H	537043938	537044412	1	537047626	3215
MLOC_56687	5H	7849940	7850371	1	7846800	-3139
MLOC_514	5H	10222755	10224223	1	10223403	0
MLOC_25280	5H	10230471	10230926	1	10229378	-1092
MLOC_50598	5H	16094137	16094455	1	16097288	2834
MLOC_77001	5H	34705944	34710208	1	34703127	-2816
MLOC_10497	5H	60729648	60734990	1	60732043	0
MLOC_63968	5H	83995018	83997426	1	83996109	0
MLOC_37715	5H	120464109	120469420	1	120462930	-1178
MLOC_54346	5H	129732661	129748531	1	129729746	-2914
MLOC_51671	5H	360720515	360722506	1	360716367	-4147
MLOC_66546	5H	421391154	421394996	1	421393449	0
MLOC_6567	5H	480898661	480900970	1	480896370	-2290
MLOC_13212	5H	540752518	540755023	1	540750020	-2497
MLOC_67289	6H	110686205	110689606	1	110687372	0
MLOC_39281	6H	229175954	229179529	1	229178224	0
MLOC_10207	6H	269267180	269271086	1	269271632	547
MLOC_71455	6H	300071650	300074424	1	300069664	-1985
MLOC_47055	6H	475260363	475263489	1	475266072	2584
MLOC_68680	6H	515252504	515257197	1	515248349	-4154
MLOC_68681	6H	515252448	515264722	2	515268653	3932
MLOC_56325	6H	529128285	529138093	1	529127077	-1207
MLOC_68988	7H	16421994	16426278	1	16429116	2839
MLOC_17238	7H	145592874	145593688	1	145592211	-662
MLOC_54330	7H	331092366	331097017	1	331096165	0
MLOC_34294	7H	570811941	570813710	1	570809723	-2217
MLOC_70403	7H	589670302	589672793	1	589671271	0

## Sheet: DM_hypogenes_roots
List of salt-induced differentially hypomethylated genes in roots
GeneID	Chromosome	start	end	strand	DMM position	Distance to gene (bp)
MLOC_59758	1H	1743334	1751200	1	1753170	1971
MLOC_10656	1H	6693409	6694182	1	6690198	-3210
MLOC_37508	1H	456703136	456705385	1	456698151	-4984
MLOC_62637	2H	2153881	2157452	1	2149633	-4247
MLOC_57446	2H	2180210	2187049	1	2183753	0
MLOC_20933	2H	552820532	552824717	1	552816069	-4462
MLOC_68641	2H	560801504	560808332	1	560799038	-2465
MLOC_39056	2H	566484325	566489256	2	566486086	0
MLOC_65594	2H	614675594	614680012	1	614680310	299
MLOC_57866	3H	282774562	282778602	1	282775689	0
MLOC_52075	3H	516331200	516337377	1	516329155	-2044
MLOC_41138	3H	536594593	536595617	1	536589751	-4841
MLOC_53310	6H	529888074	529893664	1	529887670	-403
MLOC_6466	7H	50340974	50342228	1	50341665	0
MLOC_3849	7H	408258795	408261123	1	408264435	3313

## Sheet: DM_hypergenes_roots
List of salt-induced differentially hypermethylated genes in roots
GeneID	Chromosome	start	end	strand	DMM position	Distance to gene (bp)
MLOC_61462	2H	623947016	623955659	2	623944951	-2064
MLOC_11299	3H	511318786	511330684	1	511317216	-1569
MLOC_71608	4H	23432464	23434829	1	23432423	-40
MLOC_29348	4H	282137470	282138104	1	282134264	-3205
MLOC_556	4H	522737807	522739430	1	522740859	1430
MLOC_56687	5H	7849940	7850371	1	7846046	-3893
MLOC_31879	5H	341807295	341807557	1	341804543	-2751
MLOC_63430	6H	120520737	120527894	1	120523110	0
MLOC_53027	7H	596893906	596894407	1	596897272	2866

## Sheet: DM_Exons
List of exons from salt-induced differentially methylated genes
ExonID	Exon rank	Chromosome	start	end	strand	DMM position	Distance to gene (bp)
exon:MLOC_68678.1:1	1	1H	398591702	398593186	1	398588585	-3116
exon:MLOC_67122.1:1	1	2H	546226492	546227441	1	546223539	-2952
exon:MLOC_54256.3:1	1	6H	5476816	5477213	1	5475847	-968
exon:MLOC_65226.3:1	1	2H	40058439	40058735	1	40057732	-706
exon:MLOC_67972.1:1	1	2H	475335454	475336157	1	475334998	-455
exon:MLOC_58742.3:1	1	2H	565405586	565405983	1	565405315	-270
exon:MLOC_53086.4:1	1	7H	2019079	2019404	1	2018853	-225
exon:MLOC_51868.3:1	1	3H	351519889	351520406	1	351519767	-121
exon:MLOC_60775.1:1	1	6H	504507832	504508884	1	504507716	-115
exon:MLOC_40267.2:1	1	3H	21091227	21092796	1	21091131	-95
exon:MLOC_11126.4:1	1	1H	126184012	126184377	1	126183944	-67
exon:MLOC_76930.2:1	1	3H	526666796	526667566	1	526666761	-34
exon:MLOC_66195.4:1	1	7H	290733829	290734064	2	290733802	-26
exon:MLOC_69140.1:1	1	2H	545548207	545548434	1	545548193	-13
exon:MLOC_13737.1:1	1	1H	918701	920259	1	919059	0
exon:MLOC_9830.1:1	1	1H	1969985	1972167	1	1970875	0
exon:MLOC_11917.1:1	1	1H	3178350	3180484	1	3179021	0
exon:MLOC_9970.1:1	1	1H	12201608	12206867	1	12204515	0
exon:MLOC_16241.2:1	1	1H	19421409	19423481	1	19423049	0
exon:MLOC_36684.1:1	1	1H	29986914	29990459	1	29988668	0
exon:MLOC_43104.1:1	1	1H	45452996	45455975	1	45453466	0
exon:MLOC_61019.3:1	1	1H	47242620	47244123	1	47243879	0
exon:MLOC_55352.2:1	1	1H	60650539	60654053	2	60651996	0
exon:MLOC_67637.1:1	1	1H	62839753	62841293	1	62840855	0
exon:MLOC_63539.1:1	1	1H	123726283	123726542	1	123726335	0
exon:MLOC_20060.1:1	1	1H	123845874	123847934	1	123846940	0
exon:MLOC_16333.1:1	1	1H	152779890	152780955	1	152780883	0
exon:MLOC_65080.1:1	1	1H	153248440	153249360	1	153248875	0
exon:MLOC_59793.1:1	1	1H	159248745	159250317	1	159249928	0
exon:MLOC_79167.1:1	1	1H	164564321	164565285	1	164564919	0
exon:MLOC_67136.1:1	1	1H	210968315	210968753	1	210968694	0
exon:MLOC_10420.1:1	1	1H	242224092	242229252	1	242228974	0
exon:MLOC_75615.1:1	1	1H	286558114	286559793	1	286559366	0
exon:MLOC_52636.2:1	1	1H	293479740	293484045	2	293480824	0
exon:MLOC_57040.1:1	1	1H	295869691	295869957	1	295869907	0
exon:MLOC_61784.1:1	1	1H	309943526	309946172	1	309946102	0
exon:MLOC_16345.2:1	1	1H	358633803	358634466	1	358634436	0
exon:MLOC_7466.2:1	1	1H	362168085	362170034	1	362169858	0
exon:MLOC_52366.1:1	1	1H	362862961	362863811	1	362862961	0
exon:MLOC_14006.1:1	1	1H	395335331	395339333	2	395336960	0
exon:MLOC_52730.1:1	1	1H	398201430	398201858	1	398201682	0
exon:MLOC_68678.1:1	1	1H	398591702	398593186	1	398592927	0
exon:MLOC_58493.1:1	1	1H	416318396	416318640	1	416318588	0
exon:MLOC_60622.2:1	1	1H	419906470	419907083	1	419906929	0
exon:MLOC_6461.1:1	1	1H	428959971	428961192	2	428960058	0
exon:MLOC_50930.1:1	1	1H	430488598	430490415	1	430490233	0
exon:MLOC_37998.1:1	1	1H	434899918	434900453	1	434900260	0
exon:MLOC_498.1:1	1	1H	437806556	437809783	1	437808560	0
exon:MLOC_39527.2:1	1	1H	453082231	453083004	1	453082491	0
exon:MLOC_18286.1:1	1	1H	453787361	453789605	1	453787755	0
exon:MLOC_37492.3:1	1	1H	455546066	455546999	1	455546388	0
exon:MLOC_20244.1:1	1	1H	455663898	455664330	1	455664292	0
exon:MLOC_53577.1:1	1	1H	455802578	455804048	1	455803885	0
exon:MLOC_6992.1:1	1	1H	461387926	461389212	1	461388357	0
exon:MLOC_6992.6:1	1	1H	461389835	461391241	1	461390247	0
exon:MLOC_37532.5:1	1	1H	462416339	462416671	1	462416549	0
exon:MLOC_25595.1:1	1	2H	8123346	8123996	1	8123755	0
exon:MLOC_25595.1:1	1	2H	8123346	8123996	1	8123812	0
exon:MLOC_37472.1:1	1	2H	8681790	8682930	1	8682468	0
exon:MLOC_40495.1:1	1	2H	8870047	8870653	1	8870469	0
exon:MLOC_40495.1:1	1	2H	8870047	8870653	1	8870500	0
exon:MLOC_50785.1:1	1	2H	27437804	27441579	1	27439626	0
exon:MLOC_60369.1:1	1	2H	40095106	40095509	1	40095428	0
exon:MLOC_15383.1:1	1	2H	71112805	71115517	1	71113243	0
exon:MLOC_54485.4:1	1	2H	82409208	82409511	1	82409407	0
exon:MLOC_79950.1:1	1	2H	84031269	84032467	1	84031953	0
exon:MLOC_8615.1:1	1	2H	88397699	88398165	1	88398142	0
exon:MLOC_64488.1:1	1	2H	88797663	88797936	1	88797823	0
exon:MLOC_60969.1:1	1	2H	114226754	114227021	1	114226950	0
exon:MLOC_1442.1:1	1	2H	115050991	115053388	1	115051017	0
exon:MLOC_52355.1:1	1	2H	142206228	142207875	1	142207583	0
exon:MLOC_50341.4:1	1	2H	161448333	161449541	1	161448534	0
exon:MLOC_63407.6:1	1	2H	408489336	408491040	1	408490871	0
exon:MLOC_43945.1:1	1	2H	414665001	414669684	1	414669619	0
exon:MLOC_72001.1:1	1	2H	423511717	423513012	1	423512130	0
exon:MLOC_27993.1:1	1	2H	435348577	435348990	1	435348968	0
exon:MLOC_5071.1:1	1	2H	435788041	435788104	1	435788050	0
exon:MLOC_12688.3:1	1	2H	480188103	480188560	1	480188465	0
exon:MLOC_60921.1:1	1	2H	493853733	493856154	1	493855474	0
exon:MLOC_4084.2:1	1	2H	495523195	495526712	2	495525129	0
exon:MLOC_62024.1:1	1	2H	495680762	495681095	1	495680767	0
exon:MLOC_67169.1:1	1	2H	496292896	496293612	1	496293155	0
exon:MLOC_27003.1:1	1	2H	502695475	502696257	1	502695794	0
exon:MLOC_10204.1:1	1	2H	525414989	525415179	1	525415074	0
exon:MLOC_50075.2:1	1	2H	530809446	530810090	1	530809984	0
exon:MLOC_8620.2:1	1	2H	535891381	535892745	1	535891573	0
exon:MLOC_12089.1:1	1	2H	549802419	549802810	1	549802677	0
exon:MLOC_34820.2:1	1	2H	550571038	550571634	1	550571556	0
exon:MLOC_74104.1:1	1	2H	557700569	557701186	1	557701119	0
exon:MLOC_64169.2:1	1	2H	558860778	558863751	2	558861618	0
exon:MLOC_68641.1:1	1	2H	560801504	560801703	1	560801622	0
exon:MLOC_73327.3:1	1	2H	578779530	578787682	1	578787676	0
exon:MLOC_16978.1:1	1	2H	579240576	579241513	1	579240708	0
exon:MLOC_38237.1:1	1	2H	581494178	581494570	1	581494447	0
exon:MLOC_70640.2:1	1	2H	584825073	584826286	1	584825981	0
exon:MLOC_73438.1:1	1	2H	588821828	588823907	1	588823224	0
exon:MLOC_54057.9:1	1	2H	592641652	592644577	1	592644178	0
exon:MLOC_56096.2:1	1	2H	602845790	602852514	1	602847434	0
exon:MLOC_66987.1:1	1	2H	605446586	605446946	1	605446914	0
exon:MLOC_61444.1:1	1	2H	609298740	609300254	1	609298886	0
exon:MLOC_57137.1:1	1	2H	616263506	616265694	1	616265384	0
exon:MLOC_13070.1:1	1	3H	6551653	6552494	1	6552328	0
exon:MLOC_57224.1:1	1	3H	12530194	12533921	1	12532653	0
exon:MLOC_62285.3:1	1	3H	19124985	19127401	1	19126570	0
exon:MLOC_6230.2:1	1	3H	19450794	19453088	1	19452046	0
exon:MLOC_7520.3:1	1	3H	27457756	27460705	1	27459818	0
exon:MLOC_64374.3:1	1	3H	29030143	29034537	1	29030689	0
exon:MLOC_36342.1:1	1	3H	47935833	47939471	1	47937522	0
exon:MLOC_11893.2:1	1	3H	48030072	48036008	1	48030508	0
exon:MLOC_79028.1:1	1	3H	53063526	53064375	1	53063689	0
exon:MLOC_31360.1:1	1	3H	53273886	53274800	1	53274554	0
exon:MLOC_71087.2:1	1	3H	65799274	65800498	1	65799989	0
exon:MLOC_15898.1:1	1	3H	88443958	88444273	1	88444251	0
exon:MLOC_71981.7:1	1	3H	129392402	129393447	2	129393369	0
exon:MLOC_14078.1:1	1	3H	140104839	140104975	1	140104934	0
exon:MLOC_65945.4:1	1	3H	141906894	141907126	1	141907022	0
exon:MLOC_79033.4:1	1	3H	173896802	173901060	1	173900740	0
exon:MLOC_52549.2:1	1	3H	244743070	244744336	1	244743800	0
exon:MLOC_4453.1:1	1	3H	273750281	273750748	1	273750474	0
exon:MLOC_4738.3:1	1	3H	283213472	283215303	1	283215238	0
exon:MLOC_51868.1:1	1	3H	351518971	351519273	1	351519238	0
exon:MLOC_65481.1:1	1	3H	352501658	352502155	1	352501999	0
exon:MLOC_36627.1:1	1	3H	366553535	366556942	1	366555979	0
exon:MLOC_21279.2:1	1	3H	367087461	367091240	1	367090499	0
exon:MLOC_140.3:1	1	3H	367969531	367971492	1	367971347	0
exon:MLOC_442.2:1	1	3H	377670842	377672117	1	377671780	0
exon:MLOC_21654.1:1	1	3H	406464961	406467656	1	406466902	0
exon:MLOC_51570.6:1	1	3H	417970852	417971303	1	417970902	0
exon:MLOC_71661.3:1	1	3H	425079762	425080420	1	425080244	0
exon:MLOC_5176.2:1	1	3H	426474804	426478467	1	426476574	0
exon:MLOC_60568.1:1	1	3H	427500578	427503157	1	427501373	0
exon:MLOC_66675.1:1	1	3H	430759485	430761479	1	430760360	0
exon:MLOC_7220.1:1	1	3H	433603127	433603392	1	433603281	0
exon:MLOC_3412.1:1	1	3H	437635691	437636167	1	437636071	0
exon:MLOC_8179.2:1	1	3H	449427702	449429993	1	449429056	0
exon:MLOC_71105.2:1	1	3H	451831787	451832025	1	451831906	0
exon:MLOC_22921.1:1	1	3H	453491359	453493053	1	453492795	0
exon:MLOC_44399.1:1	1	3H	465811809	465812505	1	465812440	0
exon:MLOC_13043.1:1	1	3H	486989475	486992130	1	486989707	0
exon:MLOC_12015.2:1	1	3H	489672631	489675198	1	489672822	0
exon:MLOC_56571.1:1	1	3H	498921013	498923286	1	498921718	0
exon:MLOC_19.1:1	1	3H	503679770	503683947	2	503679973	0
exon:MLOC_16818.1:1	1	3H	525411952	525413245	1	525412644	0
exon:MLOC_67327.1:1	1	3H	529662448	529664316	1	529663463	0
exon:MLOC_67327.1:1	1	3H	529662448	529664316	1	529664240	0
exon:MLOC_74291.1:1	1	4H	559190	560061	1	559464	0
exon:MLOC_52290.1:1	1	4H	8974411	8974740	1	8974665	0
exon:MLOC_55029.3:1	1	4H	13048003	13054582	1	13052332	0
exon:MLOC_16284.2:1	1	4H	23590509	23590841	1	23590808	0
exon:MLOC_72162.1:1	1	4H	24749643	24751872	1	24750715	0
exon:MLOC_57218.1:1	1	4H	27537013	27537282	1	27537187	0
exon:MLOC_78893.1:1	1	4H	33062349	33063237	1	33063149	0
exon:MLOC_51166.1:1	1	4H	202332118	202332852	1	202332138	0
exon:MLOC_45357.1:1	1	4H	207526112	207527020	1	207526790	0
exon:MLOC_72579.2:1	1	4H	243764936	243766113	1	243765412	0
exon:MLOC_4623.1:1	1	4H	244637959	244640818	1	244638287	0
exon:MLOC_4530.1:1	1	4H	245905496	245906036	1	245906014	0
exon:MLOC_60449.2:1	1	4H	251497502	251498365	1	251498247	0
exon:MLOC_9793.2:1	1	4H	347923717	347923989	1	347923949	0
exon:MLOC_53725.1:1	1	4H	354078990	354079525	1	354079517	0
exon:MLOC_22492.1:1	1	4H	417667144	417667540	1	417667448	0
exon:MLOC_36550.1:1	1	4H	419132829	419132963	1	419132899	0
exon:MLOC_59692.1:1	1	4H	428163378	428166803	1	428163732	0
exon:MLOC_52907.1:1	1	4H	428185287	428190462	1	428186108	0
exon:MLOC_58529.1:1	1	4H	434412007	434412255	1	434412213	0
exon:MLOC_74490.2:1	1	4H	434537082	434539469	1	434539300	0
exon:MLOC_53519.1:1	1	4H	436059329	436060862	1	436059667	0
exon:MLOC_10221.4:1	1	4H	441079273	441079435	1	441079433	0
exon:MLOC_66482.1:1	1	4H	451399918	451401636	1	451400028	0
exon:MLOC_67886.1:1	1	4H	468748181	468748499	1	468748463	0
exon:MLOC_7265.1:1	1	4H	482303978	482305458	1	482304922	0
exon:MLOC_6748.1:1	1	4H	501551675	501552365	1	501552343	0
exon:MLOC_13505.1:1	1	4H	503673578	503675350	1	503674785	0
exon:MLOC_10702.1:1	1	4H	504306441	504306856	1	504306690	0
exon:MLOC_54001.2:1	1	4H	533355706	533356989	1	533356578	0
exon:MLOC_67937.1:1	1	5H	5296501	5296655	1	5296642	0
exon:MLOC_53961.1:1	1	5H	22687613	22687764	1	22687717	0
exon:MLOC_5116.6:1	1	5H	24149596	24149932	2	24149700	0
exon:MLOC_10278.2:1	1	5H	24151732	24155257	1	24152225	0
exon:MLOC_61230.2:1	1	5H	66693624	66696158	1	66693816	0
exon:MLOC_19453.2:1	1	5H	75133049	75135207	2	75135072	0
exon:MLOC_5444.1:1	1	5H	75369491	75369764	1	75369700	0
exon:MLOC_51368.2:1	1	5H	84206922	84209987	1	84209945	0
exon:MLOC_59310.1:1	1	5H	106797172	106799366	1	106797767	0
exon:MLOC_59310.1:1	1	5H	106797172	106799366	1	106798069	0
exon:MLOC_64944.2:1	1	5H	139742417	139744870	1	139743676	0
exon:MLOC_60900.1:1	1	5H	359926238	359926664	1	359926598	0
exon:MLOC_13051.1:1	1	5H	375488044	375488552	1	375488510	0
exon:MLOC_62865.1:1	1	5H	390012708	390015885	1	390015830	0
exon:MLOC_4223.1:1	1	5H	400153459	400154487	1	400154249	0
exon:MLOC_20338.1:1	1	5H	421988829	421990362	1	421990048	0
exon:MLOC_60048.1:1	1	5H	434618163	434618503	1	434618363	0
exon:MLOC_40019.1:1	1	5H	437577716	437578600	1	437578301	0
exon:MLOC_63505.1:1	1	5H	445079754	445080560	1	445080390	0
exon:MLOC_12950.1:1	1	5H	456807113	456807651	1	456807155	0
exon:MLOC_11733.1:1	1	5H	460851774	460853951	1	460852093	0
exon:MLOC_1996.1:1	1	5H	470797412	470797721	1	470797639	0
exon:MLOC_5125.1:1	1	5H	475662478	475662608	1	475662537	0
exon:MLOC_8260.1:1	1	5H	485032887	485033267	1	485033175	0
exon:MLOC_67933.1:1	1	5H	485993318	485997628	1	485996319	0
exon:MLOC_24602.1:1	1	5H	486703115	486703536	1	486703486	0
exon:MLOC_56604.1:1	1	5H	492374806	492376942	2	492375505	0
exon:MLOC_52949.2:1	1	5H	496740277	496741104	1	496741052	0
exon:MLOC_66913.1:1	1	5H	497399887	497403290	1	497401419	0
exon:MLOC_71946.1:1	1	5H	504101900	504102315	1	504101938	0
exon:MLOC_21153.3:1	1	5H	505698624	505699185	1	505699044	0
exon:MLOC_15202.2:1	1	5H	515893227	515895639	1	515895225	0
exon:MLOC_38262.1:1	1	5H	518526056	518528197	1	518526886	0
exon:MLOC_79335.1:1	1	5H	524071605	524071918	1	524071808	0
exon:MLOC_16017.2:1	1	5H	530453333	530456007	2	530455141	0
exon:MLOC_14456.1:1	1	5H	536824011	536824128	1	536824025	0
exon:MLOC_63062.3:1	1	5H	539640197	539640469	1	539640429	0
exon:MLOC_14346.2:1	1	5H	543590541	543593048	1	543592791	0
exon:MLOC_44788.1:1	1	6H	13915484	13917985	1	13915558	0
exon:MLOC_9975.1:1	1	6H	17500561	17500793	1	17500726	0
exon:MLOC_65683.1:1	1	6H	18029108	18029217	1	18029215	0
exon:MLOC_7105.3:1	1	6H	20709210	20709583	1	20709555	0
exon:MLOC_74007.1:1	1	6H	24887659	24888592	1	24887906	0
exon:MLOC_65175.1:1	1	6H	29096932	29098451	1	29097988	0
exon:MLOC_43168.1:1	1	6H	62479782	62479927	1	62479909	0
exon:MLOC_53689.1:1	1	6H	63038650	63040020	1	63039001	0
exon:MLOC_15650.1:1	1	6H	84697419	84697717	1	84697715	0
exon:MLOC_61870.1:1	1	6H	112251138	112251194	1	112251166	0
exon:MLOC_73208.8:1	1	6H	120716852	120717672	1	120717488	0
exon:MLOC_72300.1:1	1	6H	167316226	167317620	1	167317573	0
exon:MLOC_71421.1:1	1	6H	192246267	192251411	1	192249752	0
exon:MLOC_7517.2:1	1	6H	247447067	247450327	1	247448194	0
exon:MLOC_7517.2:1	1	6H	247447067	247450327	1	247448271	0
exon:MLOC_14167.1:1	1	6H	258898716	258899960	1	258898863	0
exon:MLOC_78793.1:1	1	6H	274620305	274623392	1	274622490	0
exon:MLOC_11331.2:1	1	6H	358650249	358650689	1	358650360	0
exon:MLOC_81895.1:1	1	6H	358663358	358664335	1	358664313	0
exon:MLOC_15274.2:1	1	6H	364903372	364906364	1	364905891	0
exon:MLOC_10290.1:1	1	6H	364927695	364928206	1	364928105	0
exon:MLOC_75601.1:1	1	6H	375685036	375686500	1	375685068	0
exon:MLOC_78405.2:1	1	6H	380889605	380891633	1	380891169	0
exon:MLOC_14502.1:1	1	6H	408106542	408109399	1	408108115	0
exon:MLOC_56208.1:1	1	6H	426654019	426655994	1	426655854	0
exon:MLOC_16328.1:1	1	6H	451173021	451173549	1	451173519	0
exon:MLOC_9883.1:1	1	6H	461727935	461728773	1	461728712	0
exon:MLOC_55989.3:1	1	6H	471175163	471175387	1	471175385	0
exon:MLOC_17713.1:1	1	6H	471575146	471576746	1	471576242	0
exon:MLOC_34772.1:1	1	6H	473423100	473423362	1	473423347	0
exon:MLOC_4372.1:1	1	6H	475004656	475004765	1	475004657	0
exon:MLOC_6521.1:1	1	6H	476044544	476046995	1	476046814	0
exon:MLOC_70556.2:1	1	6H	477699024	477702239	1	477700551	0
exon:MLOC_54272.1:1	1	6H	498264499	498264918	1	498264826	0
exon:MLOC_60775.2:1	1	6H	504508037	504509838	1	504509079	0
exon:MLOC_19965.1:1	1	6H	508431887	508432292	1	508431903	0
exon:MLOC_37802.1:1	1	6H	512671553	512672342	1	512671816	0
exon:MLOC_72414.1:1	1	6H	518329443	518331341	1	518329677	0
exon:MLOC_62482.1:1	1	6H	521772014	521773941	1	521773128	0
exon:MLOC_59864.2:1	1	6H	529189986	529190111	1	529190106	0
exon:MLOC_36333.1:1	1	6H	530019529	530019871	1	530019819	0
exon:MLOC_18145.1:1	1	6H	532963492	532965913	1	532965400	0
exon:MLOC_23483.1:1	1	7H	16319087	16319393	1	16319377	0
exon:MLOC_57831.1:1	1	7H	21280377	21284473	1	21283409	0
exon:MLOC_12526.1:1	1	7H	27622910	27623326	1	27623280	0
exon:MLOC_11586.1:1	1	7H	27629077	27629193	1	27629105	0
exon:MLOC_17558.1:1	1	7H	35535636	35537494	1	35536261	0
exon:MLOC_36691.5:1	1	7H	41149521	41152316	1	41151677	0
exon:MLOC_10452.3:1	1	7H	50361097	50362567	1	50362343	0
exon:MLOC_6659.3:1	1	7H	61970863	61971842	1	61971518	0
exon:MLOC_75369.1:1	1	7H	61982603	61984308	1	61984080	0
exon:MLOC_34384.17:1	1	7H	65471898	65472012	1	65471980	0
exon:MLOC_61879.2:1	1	7H	66443100	66443614	1	66443123	0
exon:MLOC_61879.2:1	1	7H	66443100	66443614	1	66443482	0
exon:MLOC_18813.1:1	1	7H	66540153	66541122	1	66540257	0
exon:MLOC_70662.1:1	1	7H	88662443	88663411	1	88663193	0
exon:MLOC_70612.1:1	1	7H	90428203	90430026	1	90428390	0
exon:MLOC_52217.1:1	1	7H	108182631	108184730	1	108183287	0
exon:MLOC_58762.1:1	1	7H	126192717	126192887	1	126192799	0
exon:MLOC_80715.2:1	1	7H	145066540	145070902	1	145068157	0
exon:MLOC_11852.1:1	1	7H	145504403	145505302	1	145505055	0
exon:MLOC_80651.1:1	1	7H	188979777	188980308	1	188980264	0
exon:MLOC_75223.2:1	1	7H	250375776	250379006	1	250378584	0
exon:MLOC_19597.1:1	1	7H	250718984	250720381	1	250719261	0
exon:MLOC_80267.2:1	1	7H	254780141	254781120	1	254780326	0
exon:MLOC_16981.1:1	1	7H	255912248	255912896	1	255912894	0
exon:MLOC_44424.1:1	1	7H	258537503	258538738	1	258537691	0
exon:MLOC_22247.1:1	1	7H	259469798	259470061	1	259469943	0
exon:MLOC_34010.1:1	1	7H	262217631	262218518	1	262217778	0
exon:MLOC_51438.3:1	1	7H	331452086	331455592	1	331452849	0
exon:MLOC_77741.1:1	1	7H	335122955	335124388	1	335123050	0
exon:MLOC_3849.1:1	1	7H	408258795	408259177	1	408258848	0
exon:MLOC_76567.1:1	1	7H	437806080	437806959	1	437806950	0
exon:MLOC_72767.1:1	1	7H	440064807	440067513	1	440065454	0
exon:MLOC_66396.4:1	1	7H	457127116	457135896	1	457134430	0
exon:MLOC_51943.1:1	1	7H	471787771	471788882	1	471788693	0
exon:MLOC_64231.1:1	1	7H	511448810	511450265	1	511449663	0
exon:MLOC_17343.1:1	1	7H	515349267	515349284	1	515349282	0
exon:MLOC_17343.3:1	1	7H	515349294	515350047	1	515349890	0
exon:MLOC_80739.1:1	1	7H	518313587	518315581	1	518314151	0
exon:MLOC_37135.1:1	1	7H	520384062	520384396	1	520384321	0
exon:MLOC_39570.1:1	1	7H	520475673	520475732	1	520475716	0
exon:MLOC_63236.2:1	1	7H	533268662	533269276	1	533269177	0
exon:MLOC_64811.1:1	1	7H	539603577	539607660	1	539607291	0
exon:MLOC_39738.1:1	1	7H	544501261	544504310	1	544501902	0
exon:MLOC_61642.1:1	1	7H	557921161	557921679	1	557921572	0
exon:MLOC_70708.1:1	1	7H	558279997	558280600	1	558280025	0
exon:MLOC_70708.1:1	1	7H	558279997	558280600	1	558280597	0
exon:MLOC_56820.5:1	1	7H	564576831	564577056	1	564577039	0
exon:MLOC_69364.1:1	1	7H	571104182	571104894	1	571104706	0
exon:MLOC_36840.1:1	1	7H	589470031	589470247	1	589470115	0
exon:MLOC_43042.2:1	1	7H	589696676	589700406	2	589698321	0
exon:MLOC_51323.1:1	1	7H	599341616	599342597	1	599341936	0
exon:MLOC_52730.3:1	1	1H	398203764	398206694	1	398204886	0
exon:MLOC_53070.1:1	1	4H	431800830	431802179	1	431801649	0
exon:MLOC_514.1:1	1	5H	10222755	10224223	1	10223403	0
exon:MLOC_63968.2:1	1	5H	83995029	83997426	1	83996109	0
exon:MLOC_67722.1:1	1	6H	167808340	167808879	1	167808888	10
exon:MLOC_15174.1:1	1	2H	82464183	82464274	1	82464292	19
exon:MLOC_64771.1:1	1	7H	10618715	10621011	1	10621035	25
exon:MLOC_52548.1:1	1	3H	244739550	244739989	1	244740026	38
exon:MLOC_53682.2:1	1	7H	494620713	494620838	1	494620877	40
exon:MLOC_52165.1:1	1	3H	547322971	547323167	1	547323208	42
exon:MLOC_4554.1:1	1	5H	83779552	83779759	1	83779803	45
exon:MLOC_73050.1:1	1	5H	537068270	537068763	1	537068813	51
exon:MLOC_67844.2:1	1	3H	499482804	499484349	1	499484400	52
exon:MLOC_12967.1:1	1	6H	245558178	245558396	1	245558448	53
exon:MLOC_15900.1:1	1	1H	455560829	455560897	1	455560953	57
exon:MLOC_73856.1:1	1	7H	457487122	457487754	1	457487818	65
exon:MLOC_62426.1:1	1	6H	120568745	120569249	1	120569314	66
exon:MLOC_54463.1:1	1	5H	8126678	8126908	1	8126978	71
exon:MLOC_75724.1:1	1	4H	244817423	244817950	1	244818024	75
exon:MLOC_12658.1:1	1	2H	509223106	509223545	1	509223622	78
exon:MLOC_37902.1:1	1	3H	29121489	29121662	1	29121743	82
exon:MLOC_4305.1:1	1	2H	436047518	436047861	1	436047944	84
exon:MLOC_55254.2:1	1	4H	358315084	358315250	1	358315334	85
exon:MLOC_74491.2:1	1	6H	385858541	385858926	1	385859015	90
exon:MLOC_7670.1:1	1	3H	117102214	117102698	1	117102791	94
exon:MLOC_57313.1:1	1	6H	448617810	448618088	1	448618186	99
exon:MLOC_36861.1:1	1	2H	47207270	47207568	1	47207668	101
exon:MLOC_6132.3:1	1	5H	443204272	443204480	1	443204612	133
exon:MLOC_59531.1:1	1	3H	558644420	558644588	1	558644726	139
exon:MLOC_69611.1:1	1	1H	91429682	91429929	1	91430104	176
exon:MLOC_73139.1:1	1	5H	484200490	484200603	1	484200778	176
exon:MLOC_56003.1:1	1	1H	409507437	409507815	1	409507998	184
exon:MLOC_66405.1:1	1	5H	120218659	120218852	1	120219040	189
exon:MLOC_67384.1:1	1	5H	505704191	505705322	1	505705513	192
exon:MLOC_63186.1:1	1	5H	107889998	107890364	1	107890574	211
exon:MLOC_54515.1:1	1	2H	578609761	578610163	1	578610381	219
exon:MLOC_58678.1:1	1	6H	448968381	448968725	1	448968972	248
exon:MLOC_76462.1:1	1	2H	551573832	551574028	1	551574276	249
exon:MLOC_61028.1:1	1	3H	511682098	511682185	1	511682440	256
exon:MLOC_750.1:1	1	2H	513518569	513519135	1	513519396	262
exon:MLOC_20016.2:1	1	2H	549466792	549467059	1	549467402	344
exon:MLOC_37402.1:1	1	1H	456096012	456096282	1	456096659	378
exon:MLOC_5243.1:1	1	2H	433823347	433824011	1	433824451	441
exon:MLOC_56115.1:1	1	3H	486946978	486947887	1	486948384	498
exon:MLOC_7311.1:1	1	3H	509079117	509079516	1	509080041	526
exon:MLOC_61959.1:1	1	2H	552304818	552305481	1	552306157	677
exon:MLOC_6964.1:1	1	3H	471496887	471497135	1	471497845	711
exon:MLOC_80835.1:1	1	7H	540767429	540769524	1	540770319	796
exon:MLOC_55263.1:1	1	2H	90368143	90368344	1	90369245	902
exon:MLOC_52636.1:2	2	1H	293476878	293477505	2	293475256	-1621
exon:MLOC_5034.2:2	2	6H	508934282	508934420	1	508932834	-1447
exon:MLOC_44613.1:2	2	1H	173809114	173809167	1	173808619	-494
exon:MLOC_37244.3:2	2	3H	541201264	541201609	1	541200969	-294
exon:MLOC_14441.1:2	2	3H	516383821	516384069	1	516383617	-203
exon:MLOC_6489.1:2	2	4H	248433328	248434038	1	248433133	-194
exon:MLOC_65683.1:2	2	6H	18029533	18029680	1	18029354	-178
exon:MLOC_81053.7:2	2	3H	495597930	495598122	1	495597782	-147
exon:MLOC_37736.1:2	2	1H	30033512	30033673	1	30033392	-119
exon:MLOC_65998.6:2	2	3H	484408188	484408490	1	484408087	-100
exon:MLOC_181.1:2	2	7H	593240054	593240305	1	593239977	-76
exon:MLOC_54463.2:2	2	5H	8127278	8128019	1	8127212	-65
exon:MLOC_36460.1:2	2	3H	46202406	46202660	1	46202366	-39
exon:MLOC_62364.1:2	2	3H	466901042	466901630	1	466901006	-35
exon:MLOC_54650.6:2	2	5H	421247610	421247709	1	421247574	-35
exon:MLOC_66787.2:2	2	4H	531040785	531040806	1	531040756	-28
exon:MLOC_61515.1:2	2	1H	2898911	2899330	1	2898975	0
exon:MLOC_33802.6:2	2	1H	37643319	37644065	1	37643666	0
exon:MLOC_10770.2:2	2	1H	41790384	41790943	1	41790838	0
exon:MLOC_21736.1:2	2	1H	62464034	62465018	1	62464716	0
exon:MLOC_63208.3:2	2	1H	126236706	126236793	1	126236769	0
exon:MLOC_10718.1:2	2	1H	147509313	147509581	1	147509458	0
exon:MLOC_9808.1:2	2	1H	310172500	310173746	1	310173313	0
exon:MLOC_70897.2:2	2	1H	314418190	314418284	1	314418250	0
exon:MLOC_71041.1:2	2	1H	412905462	412906497	1	412906264	0
exon:MLOC_7035.1:2	2	1H	418561107	418561413	1	418561316	0
exon:MLOC_18441.1:2	2	1H	419090984	419091605	1	419091543	0
exon:MLOC_51193.3:2	2	1H	430975273	430975988	1	430975950	0
exon:MLOC_40554.1:2	2	1H	455901686	455902161	1	455902078	0
exon:MLOC_15072.2:2	2	2H	1834399	1834577	1	1834432	0
exon:MLOC_16890.1:2	2	2H	408724744	408724809	1	408724807	0
exon:MLOC_1304.1:2	2	2H	421682379	421682485	1	421682404	0
exon:MLOC_80753.1:2	2	2H	436006370	436007711	1	436007419	0
exon:MLOC_38227.2:2	2	2H	436498449	436498549	1	436498454	0
exon:MLOC_58411.1:2	2	2H	548425157	548425380	1	548425250	0
exon:MLOC_55473.3:2	2	2H	558541334	558541829	1	558541351	0
exon:MLOC_15146.1:2	2	2H	603725287	603727088	1	603726401	0
exon:MLOC_11661.4:2	2	2H	606188566	606190598	1	606189003	0
exon:MLOC_45016.2:2	2	2H	608880855	608882625	1	608881459	0
exon:MLOC_71595.3:2	2	2H	623086749	623086886	1	623086828	0
exon:MLOC_70826.2:2	2	3H	142367894	142369017	1	142368321	0
exon:MLOC_12117.2:2	2	3H	156211646	156211896	1	156211665	0
exon:MLOC_13771.4:2	2	3H	269629120	269629287	1	269629228	0
exon:MLOC_58522.3:2	2	3H	351649668	351650539	1	351649973	0
exon:MLOC_5223.1:2	2	3H	366452378	366455196	1	366453242	0
exon:MLOC_5989.1:2	2	3H	409545292	409545415	1	409545413	0
exon:MLOC_56556.1:2	2	3H	444357817	444359774	1	444358741	0
exon:MLOC_62662.1:2	2	3H	507846200	507848723	1	507847164	0
exon:MLOC_12195.1:2	2	3H	541377199	541377663	1	541377636	0
exon:MLOC_65217.1:2	2	3H	546453063	546453122	1	546453084	0
exon:MLOC_44235.2:2	2	3H	558951137	558951381	1	558951252	0
exon:MLOC_52019.1:2	2	4H	244728544	244730369	1	244730125	0
exon:MLOC_61490.1:2	2	4H	334670201	334670272	1	334670233	0
exon:MLOC_8033.1:2	2	4H	473780093	473780430	1	473780379	0
exon:MLOC_14895.1:2	2	4H	495970752	495970967	1	495970945	0
exon:MLOC_54104.1:2	2	4H	503332621	503332796	1	503332732	0
exon:MLOC_37775.1:2	2	5H	83538416	83539932	1	83538831	0
exon:MLOC_80445.1:2	2	5H	117127168	117127282	1	117127232	0
exon:MLOC_3895.3:2	2	5H	360119014	360124382	1	360124168	0
exon:MLOC_4945.2:2	2	5H	405825729	405827015	1	405826052	0
exon:MLOC_66740.3:2	2	5H	449548410	449548646	1	449548609	0
exon:MLOC_69710.1:2	2	5H	469827049	469827831	1	469827337	0
exon:MLOC_3906.4:2	2	5H	491796811	491798076	1	491798017	0
exon:MLOC_55776.1:2	2	6H	61884687	61885795	1	61885638	0
exon:MLOC_11882.4:2	2	6H	69839676	69839776	1	69839743	0
exon:MLOC_62913.1:2	2	6H	464528485	464528631	2	464528502	0
exon:MLOC_67417.2:2	2	6H	504533834	504534292	1	504533914	0
exon:MLOC_71919.1:2	2	6H	508817809	508818271	1	508817919	0
exon:MLOC_69827.3:2	2	6H	522663767	522664439	1	522663820	0
exon:MLOC_71534.2:2	2	6H	526121576	526122570	1	526121703	0
exon:MLOC_69970.1:2	2	7H	13210829	13211648	1	13211420	0
exon:MLOC_19897.1:2	2	7H	60842771	60843648	1	60842931	0
exon:MLOC_9943.3:2	2	7H	64824696	64824871	1	64824771	0
exon:MLOC_68525.2:2	2	7H	117491278	117494783	1	117493533	0
exon:MLOC_65749.2:2	2	7H	117906745	117906900	1	117906867	0
exon:MLOC_37511.1:2	2	7H	178620827	178621214	1	178621087	0
exon:MLOC_14837.2:2	2	7H	236987329	236987409	1	236987400	0
exon:MLOC_65378.1:2	2	7H	456031265	456032241	1	456031870	0
exon:MLOC_74469.2:2	2	7H	533293304	533293925	1	533293571	0
exon:MLOC_67457.2:2	2	1H	278587426	278589273	1	278588570	0
exon:MLOC_54330.1:2	2	7H	331094393	331097017	1	331096165	0
exon:MLOC_62970.1:2	2	7H	583930566	583930636	1	583930697	62
exon:MLOC_66546.3:2	2	5H	421392626	421393385	1	421393449	65
exon:MLOC_73251.1:2	2	1H	154108910	154109235	1	154109384	150
exon:MLOC_74792.1:2	2	3H	550751783	550751880	1	550752044	165
exon:MLOC_18976.1:2	2	3H	559322818	559322941	1	559323140	200
exon:MLOC_67289.1:2	2	6H	110686864	110686970	1	110687372	403
exon:MLOC_61294.3:3	3	7H	250191200	250191303	1	250190226	-973
exon:MLOC_63193.3:3	3	7H	533235080	533235178	1	533234377	-702
exon:MLOC_74286.1:3	3	3H	451713922	451713988	1	451713317	-604
exon:MLOC_64385.2:3	3	2H	556359392	556359692	1	556358796	-595
exon:MLOC_37071.2:3	3	3H	256588863	256589313	1	256588382	-480
exon:MLOC_53204.1:3	3	3H	14518106	14519303	1	14517856	-249
exon:MLOC_79756.4:3	3	7H	251357337	251357395	1	251357283	-53
exon:MLOC_30598.4:3	3	4H	242316133	242316220	1	242316109	-23
exon:MLOC_69164.1:3	3	1H	73757931	73758089	1	73758087	0
exon:MLOC_44017.5:3	3	1H	363052445	363053374	1	363052796	0
exon:MLOC_37107.2:3	3	1H	371215811	371216022	1	371215853	0
exon:MLOC_73858.1:3	3	1H	428759996	428764200	1	428763796	0
exon:MLOC_4273.2:3	3	1H	430920066	430920149	1	430920147	0
exon:MLOC_75960.1:3	3	1H	431057886	431058099	1	431058014	0
exon:MLOC_5607.1:3	3	2H	27152712	27153619	1	27153262	0
exon:MLOC_55663.1:3	3	2H	45888677	45889505	1	45889272	0
exon:MLOC_38368.1:3	3	2H	483515037	483516335	1	483516018	0
exon:MLOC_69140.1:3	3	2H	545549288	545551018	1	545550511	0
exon:MLOC_3886.1:3	3	2H	547216729	547216838	1	547216785	0
exon:MLOC_20130.2:3	3	2H	625398348	625398466	1	625398392	0
exon:MLOC_39247.1:3	3	3H	8314291	8314423	1	8314333	0
exon:MLOC_57556.1:3	3	3H	47884993	47887390	1	47886493	0
exon:MLOC_71129.1:3	3	3H	353973228	353974145	1	353973445	0
exon:MLOC_9632.4:3	3	3H	380694905	380695761	1	380695472	0
exon:MLOC_41312.3:3	3	3H	429457473	429458092	1	429457919	0
exon:MLOC_16313.8:3	3	3H	466254413	466254974	1	466254802	0
exon:MLOC_212.1:3	3	3H	477854442	477854583	1	477854464	0
exon:MLOC_80947.1:3	3	3H	557796850	557797051	1	557796897	0
exon:MLOC_64812.1:3	3	4H	197431999	197432166	1	197432134	0
exon:MLOC_17680.1:3	3	4H	197598596	197600212	1	197599348	0
exon:MLOC_17680.1:3	3	4H	197598596	197600212	1	197599517	0
exon:MLOC_57352.2:3	3	4H	241957306	241957968	1	241957433	0
exon:MLOC_73489.2:3	3	4H	306653196	306653434	1	306653208	0
exon:MLOC_13691.1:3	3	4H	474292460	474292563	1	474292497	0
exon:MLOC_73460.1:3	3	4H	492093128	492093274	1	492093170	0
exon:MLOC_68937.3:3	3	4H	521614308	521614465	1	521614326	0
exon:MLOC_20078.2:3	3	5H	413534872	413534966	1	413534963	0
exon:MLOC_22183.1:3	3	5H	419334453	419334604	1	419334487	0
exon:MLOC_72144.1:3	3	5H	472421162	472421994	1	472421711	0
exon:MLOC_50968.3:3	3	5H	486132155	486132283	1	486132169	0
exon:MLOC_63574.1:3	3	5H	517430958	517431183	2	517431176	0
exon:MLOC_56327.1:3	3	5H	524365270	524365800	1	524365443	0
exon:MLOC_74007.1:3	3	6H	24890357	24891092	1	24890436	0
exon:MLOC_13936.2:3	3	6H	62612124	62612517	1	62612364	0
exon:MLOC_14606.1:3	3	6H	267872986	267873147	1	267873083	0
exon:MLOC_53492.1:3	3	6H	448780858	448782577	1	448781500	0
exon:MLOC_10643.2:3	3	7H	5279811	5284077	1	5283908	0
exon:MLOC_15776.2:3	3	7H	16494696	16495891	1	16495616	0
exon:MLOC_70612.3:3	3	7H	90430412	90430605	1	90430438	0
exon:MLOC_36488.1:3	3	7H	96049105	96050237	1	96049134	0
exon:MLOC_68085.1:3	3	7H	121760130	121760208	1	121760141	0
exon:MLOC_3522.3:3	3	7H	158337213	158337271	1	158337262	0
exon:MLOC_14118.1:3	3	7H	340762749	340762833	1	340762787	0
exon:MLOC_18322.3:3	3	7H	420073321	420075047	1	420074073	0
exon:MLOC_43986.1:3	3	7H	525610388	525611717	1	525611240	0
exon:MLOC_69988.1:3	3	7H	545378172	545378650	1	545378403	0
exon:MLOC_62970.1:3	3	7H	583930776	583932228	1	583930793	0
exon:MLOC_71562.6:3	3	7H	599457055	599457103	1	599457073	0
exon:MLOC_66388.8:3	3	1H	61790876	61791279	1	61791253	0
exon:MLOC_39281.1:3	3	6H	229178218	229178604	1	229178224	0
exon:MLOC_44533.1:3	3	2H	618371037	618371113	1	618371169	57
exon:MLOC_48956.4:3	3	7H	40846545	40846598	1	40846732	135
exon:MLOC_16098.4:3	3	4H	245181626	245182136	1	245182344	209
exon:MLOC_64100.1:3	3	3H	546722429	546722849	1	546723315	467
exon:MLOC_44278.1:4	4	1H	1204451	1204505	1	1204141	-309
exon:MLOC_70403.3:4	4	7H	589671409	589671565	1	589671271	-137
exon:MLOC_10930.1:4	4	2H	610521950	610523221	1	610521887	-62
exon:MLOC_76003.1:4	4	1H	383323837	383323964	1	383323808	-28
exon:MLOC_67972.2:4	4	2H	475337349	475337698	1	475337321	-27
exon:MLOC_60702.1:4	4	3H	352277890	352277947	1	352277872	-17
exon:MLOC_53629.1:4	4	1H	455015773	455019048	2	455018918	0
exon:MLOC_75500.5:4	4	1H	456625928	456626287	1	456626041	0
exon:MLOC_64099.1:4	4	2H	59730625	59731096	1	59730799	0
exon:MLOC_55095.1:4	4	3H	7600341	7601834	1	7601404	0
exon:MLOC_56554.6:4	4	3H	8970861	8971012	1	8970973	0
exon:MLOC_66417.2:4	4	3H	27521053	27521531	1	27521140	0
exon:MLOC_53497.8:4	4	3H	99591307	99595787	1	99593601	0
exon:MLOC_4738.7:4	4	3H	283217499	283218261	1	283218168	0
exon:MLOC_18521.2:4	4	3H	421990609	421991208	2	421990844	0
exon:MLOC_43949.2:4	4	4H	8288480	8289306	1	8288628	0
exon:MLOC_6473.1:4	4	4H	43652111	43656677	2	43653803	0
exon:MLOC_57476.5:4	4	4H	133404531	133406075	2	133405040	0
exon:MLOC_57385.1:4	4	4H	138408962	138409115	1	138409019	0
exon:MLOC_13473.3:4	4	4H	474539025	474539495	1	474539333	0
exon:MLOC_37997.1:4	4	4H	501477261	501477806	1	501477402	0
exon:MLOC_65340.2:4	4	5H	484718999	484719244	2	484719192	0
exon:MLOC_50968.5:4	4	5H	486132383	486132510	1	486132418	0
exon:MLOC_43923.3:4	4	5H	502580835	502581291	1	502580842	0
exon:MLOC_30789.5:4	4	6H	158189202	158189380	2	158189252	0
exon:MLOC_4445.1:4	4	6H	513368034	513368272	1	513368060	0
exon:MLOC_51499.3:4	4	6H	526062052	526062436	1	526062367	0
exon:MLOC_5335.1:4	4	7H	13156866	13160046	1	13159318	0
exon:MLOC_55820.2:4	4	7H	74539057	74540800	2	74540790	0
exon:MLOC_65319.1:4	4	7H	158378976	158384235	2	158382351	0
exon:MLOC_62302.1:4	4	7H	584468620	584469604	1	584469075	0
exon:MLOC_67122.2:4	4	2H	546233223	546233484	1	546233246	0
exon:MLOC_58529.1:4	4	4H	434415593	434415838	1	434415773	0
exon:MLOC_10939.3:4	4	1H	457590019	457590575	1	457590734	160
exon:MLOC_10497.1:4	4	5H	60731219	60731271	1	60732043	773
exon:MLOC_59792.3:5	5	4H	501071345	501071535	1	501071322	-22
exon:MLOC_8595.1:5	5	1H	364902425	364902603	1	364902579	0
exon:MLOC_37423.1:5	5	2H	368942045	368943495	1	368943492	0
exon:MLOC_61961.3:5	5	2H	438034812	438035203	1	438034969	0
exon:MLOC_65218.1:5	5	2H	557682485	557683066	1	557682518	0
exon:MLOC_56597.1:5	5	3H	267211158	267213335	2	267213217	0
exon:MLOC_12215.1:5	5	3H	268098932	268100933	1	268100352	0
exon:MLOC_62076.1:5	5	5H	6300529	6301570	1	6300979	0
exon:MLOC_16558.1:5	5	5H	483230925	483232202	1	483231319	0
exon:MLOC_74974.1:5	5	5H	483644367	483645340	1	483644874	0
exon:MLOC_44046.1:5	5	6H	437877870	437877915	1	437877882	0
exon:MLOC_4200.2:5	5	7H	96793950	96796488	1	96795385	0
exon:MLOC_76431.1:5	5	7H	96913555	96913761	1	96913746	0
exon:MLOC_12949.2:5	5	7H	547258352	547261107	1	547259938	0
exon:MLOC_56579.1:5	5	3H	35650591	35650638	1	35651076	439
exon:MLOC_63011.3:5	5	5H	524252572	524252972	1	524253549	578
exon:MLOC_57766.1:6	6	2H	507101612	507102232	1	507101429	-182
exon:MLOC_62979.1:6	6	3H	17272289	17272799	1	17272262	-26
exon:MLOC_11990.2:6	6	2H	16134465	16134762	1	16134626	0
exon:MLOC_10546.1:6	6	2H	539101234	539101386	1	539101329	0
exon:MLOC_51720.1:6	6	2H	551336391	551341779	2	551337979	0
exon:MLOC_22265.2:6	6	3H	21084417	21084792	1	21084563	0
exon:MLOC_51166.6:6	6	4H	202335657	202335879	1	202335824	0
exon:MLOC_53110.3:6	6	4H	241925433	241928436	1	241928106	0
exon:MLOC_11868.1:6	6	4H	400253757	400253868	1	400253814	0
exon:MLOC_37586.1:6	6	5H	524232994	524234801	1	524234215	0
exon:MLOC_73711.2:6	6	6H	532899217	532900336	1	532900009	0
exon:MLOC_63772.1:7	7	2H	548692131	548692788	1	548692500	0
exon:MLOC_37328.3:7	7	2H	615493028	615493457	1	615493335	0
exon:MLOC_14157.5:7	7	2H	616069982	616071012	1	616070270	0
exon:MLOC_54654.1:7	7	4H	24694830	24694917	1	24694849	0
exon:MLOC_55435.8:7	7	4H	474498611	474498688	1	474498628	0
exon:MLOC_37719.2:7	7	6H	245960069	245960815	1	245960614	0
exon:MLOC_63586.5:7	7	6H	366157590	366157894	1	366157650	0
exon:MLOC_66195.7:7	7	7H	290732024	290732186	2	290732057	0
exon:MLOC_5071.2:7	7	2H	435790119	435790512	1	435791924	1413
exon:MLOC_58616.2:8	8	2H	8760122	8760186	1	8760184	0
exon:MLOC_54736.5:8	8	2H	480484370	480485366	1	480484804	0
exon:MLOC_64400.1:8	8	2H	495547073	495547898	1	495547800	0
exon:MLOC_6366.2:8	8	2H	550535422	550536353	1	550536069	0
exon:MLOC_51169.1:8	8	3H	88463806	88464105	1	88464011	0
exon:MLOC_74448.1:8	8	4H	218117408	218117983	1	218117672	0
exon:MLOC_10497.1:8	8	5H	60733840	60733968	1	60733948	0
exon:MLOC_55270.1:8	8	5H	450637147	450637593	1	450637558	0
exon:MLOC_62008.1:8	8	5H	456841335	456841728	1	456841482	0
exon:MLOC_55934.3:8	8	7H	163091291	163091719	2	163091692	0
exon:MLOC_37174.1:8	8	7H	163361872	163362498	1	163361920	0
exon:MLOC_30192.3:8	8	7H	457348371	457353207	1	457352897	0
exon:MLOC_70403.3:8	8	7H	589672353	589672793	1	589674024	1232
exon:MLOC_36518.3:9	9	3H	48188588	48188710	1	48188256	-331
exon:MLOC_60842.2:9	9	4H	488648092	488648154	1	488648113	0
exon:MLOC_50968.1:9	9	5H	486133503	486133992	1	486133639	0
exon:MLOC_71992.1:9	9	6H	108729321	108731440	1	108730748	0
exon:MLOC_13074.3:9	9	6H	471126684	471127507	1	471126722	0
exon:MLOC_11531.6:10	10	3H	160156973	160157401	1	160157113	0
exon:MLOC_10450.1:10	10	5H	536892909	536894857	2	536894717	0
exon:MLOC_11310.4:10	10	7H	129230537	129230722	1	129230606	0
exon:MLOC_13779.1:10	10	7H	585722808	585723139	1	585722999	0
exon:MLOC_4685.5:11	11	4H	320172642	320172820	1	320172685	0
exon:MLOC_80549.1:11	11	5H	497661313	497661914	1	497661380	0
exon:MLOC_12977.2:11	11	1H	349215586	349216320	1	349216341	22
exon:MLOC_51193.1:11	11	1H	430979988	430980136	1	430982853	2718
exon:MLOC_14604.2:14	14	7H	570619555	570619694	1	570619478	-76
exon:MLOC_70449.2:14	14	4H	9184698	9184977	1	9184674	-23
exon:MLOC_65827.3:14	14	1H	437728988	437729373	1	437729149	0
exon:MLOC_59102.2:14	14	6H	229145146	229147234	1	229146399	0
exon:MLOC_11770.3:14	14	7H	75982787	75982925	1	75982828	0
exon:MLOC_70501.1:14	14	7H	45414872	45414911	1	45414935	25
exon:MLOC_20244.3:15	15	1H	455668980	455669193	1	455669045	0
exon:MLOC_4568.8:17	17	3H	451798939	451799926	2	451799730	0
exon:MLOC_52920.7:19	19	4H	8007101	8007279	1	8007191	0
