# Supplementary material for: Salt Stress Induces Non-CG Methylation in Coding Regions of Barley Seedlings (<em>Hordeum vulgare</em>)
Source: Preprints.org preprint supplement (doi:10.20944/preprints201804.0323.v2), 2018-06-15
Supplement: Supplementary file 4 [file Supplemental_Dataset_S3_Annotation_DM-genes.xlsx]

## Sheet: Info
Supplemental Data Set S3. Annotation of salt-induced differentially methylated genes in barley leaves and roots
Title: Methylation-sensitive GBS reveals non-CG methylation in gene-body induced by salt stress in barley seedlings (Hordeum vulgare)
Moumouni Konate1, Mike J. Wilkinson2, Benjamin T. Mayne3, Stephen M. Pederson4, Eileen S. Scott5, Bettina Berger5, 6, Carlos Marcelino Rodriguez Lopez5,7*
1,5Institut de l'Environnement et de Recherches Agricoles (INERA), Station de Farako-Ba, 01 BP 910 Bobo-Dioulasso 01, Burkina Faso; email: mouni.konate@gmail.com.
2Pwllpeiran Upland Research Centre, Institute of Biological, Environmental and Rural Sciences, Penglais Campus, Aberystwyth, Ceredigion, SY23 3FG, UK.
3Robinson Research Institute, School of Medicine, The University of Adelaide, SA 5005 Australia
4Bioinformatics Hub, School of Biological sciences, The University of Adelaide, SA 5005 Australia
5School of Agriculture, Food and Wine, The University of Adelaide, Waite Campus, PMB 1, Glen Osmond, SA 5064, Australia
6The Plant Accelerator, Australian Plant Phenomics Facility, Waite Campus, The University of Adelaide, SA 5064, Australia
7Environmental Epigenetics and Genetics Group; Department of Horticulture, College of Agriculture, Food and Environment, University of Kentucky, Lexington, KY 40546, USA
*Corresponding authors: mjw19@aber.ac.uk (M.J.M.); carlos.rodriguezlopez@uky.edu (C.M.R.L.);
Tel.: +44-(0)-1970-823204 (M.J.M.); +1-859-257-5020 ext. 80749 (C.M.R.L.)

## Sheet: DMhypergenes_Leaf_BP
term_ID	description	frequency	plot_X	plot_Y	plot_size	log10 p-value	uniqueness	dispensability	representative	eliminated
GO:0034641	cellular nitrogen compound metabolic process	0.3343	4.009	2.477	7.221	-59.7423	0.659	0.201	34641	0
GO:0043170	macromolecule metabolic process	0.328	1.124	-4.642	7.213	-54.4306	0.805	0.12	43170	0
GO:1901564	organonitrogen compound metabolic process	0.1957	2.87	-0.196	6.988	-53.4056	0.693	0.428	1901564	0
GO:0019538	protein metabolic process	0.1233	3.699	-6.071	6.788	-51.7986	0.776	0.158	19538	0
GO:0044249	cellular biosynthetic process	0.2821	6.935	-0.404	7.147	-51.7986	0.641	0.38	44249	0
GO:1901566	organonitrogen compound biosynthetic process	0.093	6.188	0.571	6.665	-50.7212	0.588	0.457	1901566	0
GO:0044260	cellular macromolecule metabolic process	0.2859	3.677	-3.689	7.153	-49.8013	0.699	0.448	44260	0
GO:1901576	organic substance biosynthetic process	0.2889	6.461	-2.02	7.157	-49.8013	0.652	0.663	1901576	0
GO:0044271	cellular nitrogen compound biosynthetic process	0.1579	5.78	1.083	6.895	-48.2565	0.575	0.534	44271	0
GO:0044267	cellular protein metabolic process	0.0878	4.323	-5.093	6.64	-45.7077	0.747	0.331	44267	0
GO:0010467	gene expression	0.167	3.309	-5.966	6.92	-37.0477	0.781	0.493	10467	0
GO:0006518	peptide metabolic process	0.0032	5.145	6.317	5.206	-36.2976	0.719	0	6518	0
GO:0034645	cellular macromolecule biosynthetic process	0.172	5.332	-2.4	6.932	-34.5436	0.603	0.55	34645	0
GO:0043603	cellular amide metabolic process	0.0091	3.326	6.56	5.656	-30.8125	0.767	0.14	43603	0
GO:0006091	generation of precursor metabolites and energy	0.0322	-2.876	-2.582	6.205	-27.8539	0.847	0.062	6091	0
GO:0009059	macromolecule biosynthetic process	0.1767	5.758	-3.16	6.944	-26.9747	0.64	0.554	9059	0
GO:1901360	organic cyclic compound metabolic process	0.3391	1.815	-4.841	7.227	-18.8125	0.803	0.23	1901360	0
GO:0006725	cellular aromatic compound metabolic process	0.3305	0.701	1.026	7.216	-18.8125	0.784	0.259	6725	0
GO:0055114	oxidation-reduction process	0.1504	-0.233	6.761	6.874	-17.4737	0.783	0.177	55114	0
GO:0015979	photosynthesis	0.0034	-4.668	-3.974	5.232	-16.3925	0.877	0.063	15979	0
GO:0006796	phosphate-containing compound metabolic process	0.1669	3.73	4.563	6.919	-15.6716	0.561	0.603	6796	0
GO:0022900	electron transport chain	0.0116	-2.225	5.868	5.763	-14.3595	0.779	0.072	22900	0
GO:1901135	carbohydrate derivative metabolic process	0.1165	-0.816	-6	6.763	-14.219	0.836	0.155	1901135	0
GO:0044281	small molecule metabolic process	0.215	-0.612	6.37	7.029	-14.219	0.772	0.328	44281	0
GO:0072521	purine-containing compound metabolic process	0.0806	4.939	2.999	6.603	-14.219	0.614	0.536	72521	0
GO:0009199	ribonucleoside triphosphate metabolic process	0.0656	3.686	3.461	6.514	-14.219	0.387	0.655	9199	0
GO:0006139	nucleobase-containing compound metabolic process	0.2992	3.931	0.382	7.173	-12.8356	0.578	0.507	6139	0
GO:0015672	monovalent inorganic cation transport	0.0271	-5.141	1.016	6.13	-10.054	0.789	0	15672	0
GO:0046129	purine ribonucleoside biosynthetic process	0.0107	6.265	2.612	5.728	-10.054	0.433	0.256	46129	0
GO:0009206	purine ribonucleoside triphosphate biosynthetic process	0.0051	6.128	3.201	5.401	-10.054	0.464	0.445	9206	0
GO:0090407	organophosphate biosynthetic process	0.0446	7.828	0.457	6.346	-9.7122	0.497	0.087	90407	0
GO:0006811	ion transport	0.0599	-4.882	1.608	6.474	-8.4802	0.802	0.631	6811	0
GO:0006810	transport	0.1738	-5.215	0.279	6.937	-8.118	0.878	0.537	6810	0
GO:0043412	macromolecule modification	0.0509	2.694	-7.05	6.404	-7.0195	0.818	0.295	43412	0
GO:1901137	carbohydrate derivative biosynthetic process	0.0392	8.555	-1.251	6.29	-6.3605	0.631	0.489	1901137	0
GO:0015985	energy coupled proton transport, down electrochemical gradient	0.0045	-4.745	1.194	5.35	-5.2255	0.765	0.687	15985	0
GO:0019684	photosynthesis, light reaction	0.0009	-3.555	5.334	4.627	-4.2857	0.874	0.577	19684	0
GO:0018130	heterocycle biosynthetic process	0.1615	6.743	0.439	6.905	-4.1543	0.592	0.538	18130	0
GO:0055086	nucleobase-containing small molecule metabolic process	0.1084	2.784	2.636	6.732	-4.0615	0.531	0.357	55086	0
GO:0006818	hydrogen transport	0.0198	-5.208	0.56	5.992	-4.0526	0.823	0.481	6818	0
GO:0065003	macromolecular complex assembly	0.0068	-3.818	-5.483	5.527	-2.9414	0.919	0.026	65003	0
GO:0043604	amide biosynthetic process	0.0055	null	null	5.439	-36.2976	0.671	0.852	6518	1
GO:0006753	nucleoside phosphate metabolic process	0.099	null	null	6.692	-15.6716	0.373	0.816	9199	1
GO:0009259	ribonucleotide metabolic process	0.0784	null	null	6.591	-15.109	0.362	0.795	9199	1
GO:0009141	nucleoside triphosphate metabolic process	0.0672	null	null	6.524	-15.109	0.393	0.768	9199	1
GO:0009116	nucleoside metabolic process	0.0823	null	null	6.612	-14.219	0.378	0.824	9199	1
GO:0009167	purine ribonucleoside monophosphate metabolic process	0.0601	null	null	6.475	-13.8539	0.38	0.753	9199	1
GO:0009205	purine ribonucleoside triphosphate metabolic process	0.0648	null	null	6.508	-12.2373	0.387	0.922	9199	1
GO:0046034	ATP metabolic process	0.0537	null	null	6.427	-12.2373	0.339	0.922	9199	1
GO:0098655	cation transmembrane transport	0.0286	null	null	6.153	-9.7122	0.722	0.864	15672	1
GO:0009126	purine nucleoside monophosphate metabolic process	0.0601	null	null	6.476	-9.4763	0.381	0.91	9199	1
GO:0006164	purine nucleotide biosynthetic process	0.0147	null	null	5.864	-9.4134	0.381	0.93	46129	1
GO:0009127	purine nucleoside monophosphate biosynthetic process	0.011	null	null	5.737	-8.4802	0.415	0.707	9206	1
GO:0098662	inorganic cation transmembrane transport	0.0231	null	null	6.06	-8.2924	0.725	0.839	15672	1
GO:0019693	ribose phosphate metabolic process	0.079	null	null	6.595	-7.1791	0.46	0.71	9199	1
GO:0042451	purine nucleoside biosynthetic process	0.0107	null	null	5.728	-6.7235	0.433	0.93	46129	1
GO:0009152	purine ribonucleotide biosynthetic process	0.0138	null	null	5.836	-6.1198	0.373	0.958	46129	1
GO:0046390	ribose phosphate biosynthetic process	0.0182	null	null	5.958	-5.3354	0.444	0.729	46129	1
GO:0009161	ribonucleoside monophosphate metabolic process	0.0636	null	null	6.5	-5.2652	0.377	0.919	9199	1
GO:0009124	nucleoside monophosphate biosynthetic process	0.0156	null	null	5.89	-4.6968	0.401	0.799	9206	1
GO:0009168	purine ribonucleoside monophosphate biosynthetic process	0.011	null	null	5.737	-4.4101	0.415	0.908	9206	1
GO:0009163	nucleoside biosynthetic process	0.0167	null	null	5.918	-3.9229	0.425	0.929	46129	1
GO:0009150	purine ribonucleotide metabolic process	0.0746	null	null	6.569	-2.9967	0.348	0.909	9199	1
GO:0009156	ribonucleoside monophosphate biosynthetic process	0.0145	null	null	5.857	-2.4307	0.4	0.936	9206	1

## Sheet: DMhypergenes_Leaf_CC
REVIGO analysis for GO enrichment from differentially hypermethylated genes in leaves: cellular components (CC)
term_ID	description	frequency	plot_X	plot_Y	plot_size	log10 p-value	uniqueness	dispensability	representative	eliminated
GO:0009536	plastid	0.01594	4.864	-0.111	5.573	-108.475	0.42	0	9536	0
GO:0070069	cytochrome complex	0.00048	-3.71	5.019	4.056	-2.8042	0.756	0	70069	0
GO:0009579	thylakoid	0.00411	-3.605	-5.407	4.985	-73.8013	0.744	0.097	9579	0
GO:0005737	cytoplasm	0.38159	0.237	-2.531	6.952	-143.207	0.651	0.183	5737	0
GO:0044444	cytoplasmic part	0.13606	1.989	-3.96	6.505	-139.996	0.644	0.316	44444	0
GO:0030529	ribonucleoprotein complex	0.06088	-2.305	1.594	6.155	-25.7471	0.551	0.317	30529	0
GO:0009534	chloroplast thylakoid	0.00218	5.937	0.991	4.71	-76.0726	0.191	0.431	9534	0
GO:0044436	thylakoid part	0.00397	null	null	4.97	-72.0039	0.419	0.967	9534	1
GO:0044434	chloroplast part	0.00278	null	null	4.815	-77.4989	0.312	0.976	9534	1
GO:0016469	proton-transporting two-sector ATPase complex	0.00995	null	null	5.369	-10.054	0.637	1.051	9534	1
GO:0031976	plastid thylakoid	0.00218	null	null	4.71	-76.0726	0.191	0.987	9534	1
GO:0009521	photosystem	0.00214	null	null	4.701	-23.8097	0.306	0.927	9534	1
GO:0042651	thylakoid membrane	0.00308	null	null	4.859	-69.1463	0.421	0.919	9534	1
GO:0055035	plastid thylakoid membrane	0.00212	null	null	4.697	-60.2299	0.189	0.995	9534	1
GO:0031984	organelle subcompartment	0.00233	5.198	2.626	4.738	-76.0726	0.459	0.436	31984	0
GO:0044391	ribosomal subunit	0.01358	2.347	1.986	5.504	-11.9508	0.313	0.512	44391	0
GO:0043232	intracellular non-membrane-bounded organelle	0.07682	3.156	0.287	6.256	-30.8125	0.408	0.659	43232	0
GO:0005840	ribosome	0.05756	null	null	6.131	-6.7122	0.308	0.835	43232	1
GO:0043231	intracellular membrane-bounded organelle	0.08847	3.85	0.11	6.318	-117.767	0.352	0.666	43231	0
GO:0044435	plastid part	0.0028	5.44	1.442	4.817	-77.4989	0.364	0.678	44435	0
GO:0009507	chloroplast	0.01445	null	null	5.531	-72.1972	0.315	0.805	44435	1

## Sheet: DMhypergenes_Leaf_MF
REVIGO analysis for GO enrichment from differentially hypermethylated genes in leaves: molecular functions (MF)
term_ID	description	frequency	plot_X	plot_Y	plot_size	log10 p-value	uniqueness	dispensability	representative	eliminated
GO:0015077	monovalent inorganic cation transmembrane transporter activity	0.02605	-3.977	4.986	6.091	-12.767	0.492	0	15077	0
GO:0015075	ion transmembrane transporter activity	0.05338	null	null	6.402	-11.3152	0.496	0.816	15077	1
GO:0019829	cation-transporting ATPase activity	0.0077	null	null	5.562	-2.5187	0.434	0.733	15077	1
GO:0008324	cation transmembrane transporter activity	0.03895	null	null	6.265	-10.7959	0.489	0.805	15077	1
GO:0046906	tetrapyrrole binding	0.01906	3.146	6.2	5.955	-13.7144	0.73	0	46906	0
GO:0050136	NADH dehydrogenase (quinone) activity	0.00783	-4.514	-2.153	5.569	-2.2213	0.846	0	50136	0
GO:0016818	hydrolase activity, acting on acid anhydrides, in phosphorus-containing anhydrides	0.07512	-0.959	-5.499	6.551	-6.1331	0.77	0.03	16818	0
GO:0046914	transition metal ion binding	0.07335	4.514	-4.919	6.54	-7.2526	0.772	0.079	46914	0
GO:0003676	nucleic acid binding	0.21746	4.173	2.078	7.012	-21.2716	0.691	0.18	3676	0
GO:0003723	RNA binding	0.0586	6.187	4.374	6.443	-15.109	0.711	0.226	3723	0
GO:0017076	purine nucleotide binding	0.15986	5.683	1.056	6.879	-5.1415	0.59	0.294	17076	0
GO:0015399	primary active transmembrane transporter activity	0.02064	-4.295	4.237	5.99	-4.8633	0.521	0.607	15399	0
GO:0032555	purine ribonucleotide binding	0.15587	6.123	1.489	6.868	-3.988	0.576	0.687	32555	0
GO:0032553	ribonucleotide binding	0.16286	null	null	6.887	-2.8801	0.575	0.817	32555	1

## Sheet: DMhypogenes_Leaf_BP
REVIGO analysis for GO enrichment from differentially hypomethylated genes in leaves: biological processes (BP)
term_ID	description	frequency	plot_X	plot_Y	plot_size	log10 p-value	uniqueness	dispensability	representative	eliminated
GO:0009968	negative regulation of signal transduction	0.00177	2.592	-5.641	4.944	-104.387	0.773	0	9968	0
GO:0031324	negative regulation of cellular metabolic process	0.00716	null	null	5.552	-10.7011	0.802	0.819	9968	1
GO:0035556	intracellular signal transduction	0.02718	null	null	6.131	-10.762	0.726	0.912	9968	1
GO:0045934	negative regulation of nucleobase-containing compound metabolic process	0.00542	null	null	5.431	-6.2441	0.752	0.92	9968	1
GO:0010629	negative regulation of gene expression	0.00594	null	null	5.47	-7.0419	0.789	0.928	9968	1
GO:0010558	negative regulation of macromolecule biosynthetic process	0.00503	null	null	5.398	-3.3565	0.755	0.913	9968	1
GO:0007165	signal transduction	0.03804	null	null	6.277	-42.5452	0.715	0.653	9968	1
GO:0033554	cellular response to stress	0.02335	null	null	6.065	-5.4461	0.884	0.796	9968	1
GO:0032101	regulation of response to external stimulus	0.00316	null	null	5.196	-13.0501	0.856	0.817	9968	1
GO:0009890	negative regulation of biosynthetic process	0.00514	null	null	5.408	-6.2441	0.807	0.915	9968	1
GO:0006974	cellular response to DNA damage stimulus	0.01978	null	null	5.993	-4.9957	0.886	0.722	9968	1
GO:0036211	protein modification process	0.02895	7.72	-1.062	6.158	-192.544	0.846	0	36211	0
GO:0018193	peptidyl-amino acid modification	0.00774	null	null	5.586	-17.4647	0.838	0.819	36211	1
GO:0044267	cellular protein metabolic process	0.08784	null	null	6.64	-247.513	0.796	0.669	36211	1
GO:0032446	protein modification by small protein conjugation	0.00123	null	null	4.785	-12.9469	0.864	0.552	36211	1
GO:0043414	macromolecule methylation	0.01178	null	null	5.768	-13.4609	0.847	0.708	36211	1
GO:0006412	translation	0.04698	null	null	6.369	-9.5654	0.745	0.578	36211	1
GO:0006464	cellular protein modification process	0.02895	null	null	6.158	-115.038	0.812	0.798	36211	1
GO:0009451	RNA modification	0.01915	null	null	5.979	-8.0969	0.773	0.754	36211	1
GO:0006508	proteolysis	0.03705	null	null	6.266	-17.062	0.852	0.537	36211	1
GO:0034645	cellular macromolecule biosynthetic process	0.172	null	null	6.932	-49.4389	0.719	0.592	36211	1
GO:0045184	establishment of protein localization	0.0168	-4.032	-3.953	5.922	-37.9031	0.89	0	45184	0
GO:0015031	protein transport	0.01595	null	null	5.9	-32.284	0.888	0.972	45184	1
GO:0070727	cellular macromolecule localization	0.00671	null	null	5.523	-26.4168	0.888	0.847	45184	1
GO:0033365	protein localization to organelle	0.00169	null	null	4.925	-5.6126	0.895	0.773	45184	1
GO:0006886	intracellular protein transport	0.00521	null	null	5.413	-15.2027	0.881	0.969	45184	1
GO:0008104	protein localization	0.01716	null	null	5.931	-40.3251	0.892	0.945	45184	1
GO:0072666	establishment of protein localization to vacuole	4e-05	null	null	3.269	-6.6038	0.918	0.764	45184	1
GO:0006605	protein targeting	0.0038	null	null	5.277	-6.1643	0.837	0.94	45184	1
GO:0010876	lipid localization	0.00098	null	null	4.687	-9.857	0.916	0.699	45184	1
GO:0072594	establishment of protein localization to organelle	0.00153	null	null	4.882	-15.2027	0.894	0.756	45184	1
GO:0034613	cellular protein localization	0.0067	null	null	5.523	-28.9508	0.882	0.879	45184	1
GO:0071669	plant-type cell wall organization or biogenesis	0.00011	0.677	-3.062	3.728	-4.9586	0.964	0.018	71669	0
GO:0044036	cell wall macromolecule metabolic process	0.00893	null	null	5.648	-2.6808	0.861	0.642	71669	1
GO:0006996	organelle organization	0.00932	-2.231	-1.683	5.666	-63.1433	0.883	0.026	6996	0
GO:0000280	nuclear division	0.00064	null	null	4.503	-8.466	0.893	0.746	6996	1
GO:0071822	protein complex subunit organization	0.00868	null	null	5.635	-23.1427	0.876	0.777	6996	1
GO:0071826	ribonucleoprotein complex subunit organization	0.00109	null	null	4.732	-56.9393	0.895	0.524	6996	1
GO:0022613	ribonucleoprotein complex biogenesis	0.01055	null	null	5.72	-5.2168	0.92	0.759	6996	1
GO:1902589	single-organism organelle organization	0.00635	null	null	5.5	-21.1349	0.82	0.619	6996	1
GO:0061024	membrane organization	0.01009	null	null	5.701	-9.5918	0.883	0.684	6996	1
GO:0051276	chromosome organization	0.00336	null	null	5.223	-10.762	0.883	0.861	6996	1
GO:0006325	chromatin organization	0.00109	null	null	4.733	-20.8665	0.885	0.78	6996	1
GO:0022607	cellular component assembly	0.01474	null	null	5.865	-31.1681	0.876	0.678	6996	1
GO:0051783	regulation of nuclear division	0.00017	null	null	3.922	-6.9957	0.801	0.903	6996	1
GO:0070271	protein complex biogenesis	0.00565	null	null	5.449	-14.7077	0.924	0.708	6996	1
GO:0065003	macromolecular complex assembly	0.00676	null	null	5.527	-16.1778	0.877	0.923	6996	1
GO:0010965	regulation of mitotic sister chromatid separation	9e-05	null	null	3.659	-2.2447	0.796	0.87	6996	1
GO:0043933	macromolecular complex subunit organization	0.01063	null	null	5.723	-22.6289	0.882	0.688	6996	1
GO:0033043	regulation of organelle organization	0.00097	null	null	4.685	-7.6819	0.821	0.772	6996	1
GO:0007010	cytoskeleton organization	0.00151	null	null	4.876	-12.0482	0.89	0.802	6996	1
GO:0045229	external encapsulating structure organization	0.00903	null	null	5.652	-10.6517	0.884	0.643	6996	1
GO:0051128	regulation of cellular component organization	0.0102	null	null	5.705	-2.2268	0.792	0.685	6996	1
GO:0034622	cellular macromolecular complex assembly	0.00504	null	null	5.399	-20.0301	0.879	0.896	6996	1
GO:0006461	protein complex assembly	0.00564	null	null	5.448	-17.5867	0.878	0.948	6996	1
GO:0006091	generation of precursor metabolites and energy	0.03224	1.009	1.169	6.205	-47.0506	0.907	0.035	6091	0
GO:0010228	vegetative to reproductive phase transition of meristem	9e-05	-1.035	-3.604	3.674	-59.7305	0.87	0.036	10228	0
GO:0090567	reproductive shoot system development	0.00017	null	null	3.939	-12.6308	0.86	0.951	10228	1
GO:0048580	regulation of post-embryonic development	0.0001	null	null	3.694	-9.5817	0.809	0.824	10228	1
GO:0048608	reproductive structure development	0.00057	null	null	4.449	-37.9031	0.859	0.892	10228	1
GO:0007275	multicellular organismal development	0.0046	null	null	5.36	-52.0635	0.86	0.661	10228	1
GO:0048437	floral organ development	0.0001	null	null	3.689	-4.4685	0.863	0.967	10228	1
GO:0048447	sepal morphogenesis	1e-05	null	null	2.824	-33.1096	0.876	0.945	10228	1
GO:0048449	floral organ formation	3e-05	null	null	3.225	-35.6536	0.87	0.779	10228	1
GO:2000026	regulation of multicellular organismal development	0.00104	null	null	4.714	-8.1113	0.793	0.79	10228	1
GO:0048831	regulation of shoot system development	8e-05	null	null	3.61	-4.857	0.812	0.836	10228	1
GO:0048827	phyllome development	0.00015	null	null	3.872	-8.0969	0.869	0.943	10228	1
GO:0030154	cell differentiation	0.00281	null	null	5.146	-5.1487	0.837	0.754	10228	1
GO:0048367	shoot system development	0.00026	null	null	4.118	-17.1952	0.875	0.711	10228	1
GO:0010374	stomatal complex development	4e-05	null	null	3.331	-9.719	0.877	0.788	10228	1
GO:0048316	seed development	0.0001	null	null	3.697	-10.0937	0.868	0.895	10228	1
GO:0009790	embryo development	0.00084	null	null	4.621	-6.0511	0.869	0.777	10228	1
GO:0009791	post-embryonic development	0.00049	null	null	4.388	-34.0182	0.873	0.745	10228	1
GO:0009793	embryo development ending in seed dormancy	8e-05	null	null	3.6	-3.5884	0.87	0.983	10228	1
GO:0009908	flower development	0.00017	null	null	3.931	-12.1568	0.859	0.925	10228	1
GO:0022412	cellular process involved in reproduction in multicellular organism	0.00024	null	null	4.076	-4.4123	0.856	0.7	10228	1
GO:0061458	reproductive system development	0.00057	null	null	4.451	-39.1746	0.87	0.753	10228	1
GO:0048731	system development	0.00354	null	null	5.246	-44.7305	0.855	0.878	10228	1
GO:1901615	organic hydroxy compound metabolic process	0.00994	1.037	-4.005	5.694	-3.9867	0.933	0.062	1901615	0
GO:0015979	photosynthesis	0.00343	0.096	-2.001	5.232	-20.2782	0.928	0.063	15979	0
GO:0043603	cellular amide metabolic process	0.0091	5.938	6.38	5.656	-40.8729	0.874	0.07	43603	0
GO:1903047	mitotic cell cycle process	0.00077	-1.127	0.002	4.582	-8.466	0.898	0.075	1903047	0
GO:0000278	mitotic cell cycle	0.00087	null	null	4.637	-8.466	0.9	0.591	1903047	1
GO:0098813	nuclear chromosome segregation	0.00029	null	null	4.166	-2.9202	0.906	0.682	1903047	1
GO:0051726	regulation of cell cycle	0.00147	null	null	4.864	-2.1812	0.821	0.619	1903047	1
GO:0006790	sulfur compound metabolic process	0.01673	2.08	-1.819	5.92	-9.1586	0.914	0.076	6790	0
GO:0046490	isopentenyl diphosphate metabolic process	0.00167	-5.155	4.836	4.919	-48.2182	0.784	0.079	46490	0
GO:0044255	cellular lipid metabolic process	0.02577	null	null	6.108	-42.4698	0.789	0.67	46490	1
GO:0006650	glycerophospholipid metabolic process	0.00339	null	null	5.227	-4.475	0.769	0.87	46490	1
GO:0030258	lipid modification	0.00252	null	null	5.099	-2.4541	0.831	0.699	46490	1
GO:0046488	phosphatidylinositol metabolic process	0.00149	null	null	4.87	-2.1561	0.785	0.904	46490	1
GO:0008654	phospholipid biosynthetic process	0.00857	null	null	5.63	-15.3625	0.687	0.815	46490	1
GO:0006720	isoprenoid metabolic process	0.00466	null	null	5.365	-10.762	0.821	0.746	46490	1
GO:0006721	terpenoid metabolic process	0.00277	null	null	5.14	-2.757	0.826	0.949	46490	1
GO:0008299	isoprenoid biosynthetic process	0.00463	null	null	5.362	-10.0937	0.756	0.746	46490	1
GO:0009240	isopentenyl diphosphate biosynthetic process	0.00167	null	null	4.919	-9.5817	0.728	0.908	46490	1
GO:0006644	phospholipid metabolic process	0.01014	null	null	5.703	-4.2916	0.748	0.817	46490	1
GO:0006631	fatty acid metabolic process	0.00867	null	null	5.635	-7.6819	0.745	0.801	46490	1
GO:0007017	microtubule-based process	0.00172	-2.93	0.158	4.932	-15.2027	0.907	0.079	7017	0
GO:0006732	coenzyme metabolic process	0.02742	1.686	0.376	6.135	-26.7959	0.892	0.081	6732	0
GO:0006733	oxidoreduction coenzyme metabolic process	0.00807	null	null	5.604	-5.6676	0.905	0.761	6732	1
GO:0006739	NADP metabolic process	0.00434	null	null	5.334	-7.3526	0.723	0.915	6732	1
GO:0019362	pyridine nucleotide metabolic process	0.00666	null	null	5.521	-23.1427	0.711	0.744	6732	1
GO:0051188	cofactor biosynthetic process	0.02758	null	null	6.137	-12.9469	0.826	0.891	6732	1
GO:0051186	cofactor metabolic process	0.03606	0.354	1.702	6.254	-36.8761	0.906	0.084	51186	0
GO:0007049	cell cycle	0.0141	-4.761	-0.503	5.846	-52.71	0.887	0.095	7049	0
GO:0006081	cellular aldehyde metabolic process	0.00465	-5.715	0.74	5.365	-15.3143	0.861	0.104	6081	0
GO:0046148	pigment biosynthetic process	0.00452	-0.061	6.384	5.352	-4.6345	0.832	0.105	46148	0
GO:0042440	pigment metabolic process	0.0049	-4.296	1.527	5.387	-8.466	0.906	0.105	42440	0
GO:0043170	macromolecule metabolic process	0.32799	5.666	0.253	7.213	-300	0.889	0.109	43170	0
GO:0006793	phosphorus metabolic process	0.16891	3.142	3.494	6.924	-158.222	0.881	0.112	6793	0
GO:0022900	electron transport chain	0.01163	-6.305	1.461	5.763	-13.15	0.839	0.115	22900	0
GO:0009060	aerobic respiration	0.01366	null	null	5.832	-5.7352	0.835	0.899	22900	1
GO:0045333	cellular respiration	0.02258	null	null	6.051	-7.3526	0.826	0.853	22900	1
GO:0015980	energy derivation by oxidation of organic compounds	0.0241	null	null	6.079	-4.8697	0.825	0.884	22900	1
GO:0022904	respiratory electron transport chain	0.00881	null	null	5.642	-9.6576	0.843	0.724	22900	1
GO:0019684	photosynthesis, light reaction	0.00085	null	null	4.627	-7.3072	0.919	0.577	22900	1
GO:0005975	carbohydrate metabolic process	0.05984	3.686	-1.83	6.474	-27.7077	0.905	0.129	5975	0
GO:0007154	cell communication	0.04358	-5.859	-0.196	6.336	-46.9172	0.87	0.136	7154	0
GO:0032787	monocarboxylic acid metabolic process	0.02312	-4.729	5.153	6.061	-22.6596	0.763	0.146	32787	0
GO:0072330	monocarboxylic acid biosynthetic process	0.0082	null	null	5.611	-7.6819	0.73	0.756	32787	1
GO:0016053	organic acid biosynthetic process	0.04667	null	null	6.366	-19.9393	0.676	0.629	32787	1
GO:0046394	carboxylic acid biosynthetic process	0.0462	null	null	6.361	-17.8268	0.674	0.917	32787	1
GO:0019752	carboxylic acid metabolic process	0.09041	null	null	6.653	-15.9626	0.717	0.897	32787	1
GO:0043648	dicarboxylic acid metabolic process	0.01124	null	null	5.748	-4.0106	0.782	0.53	32787	1
GO:1901607	alpha-amino acid biosynthetic process	0.03033	null	null	6.179	-13.4609	0.667	0.863	32787	1
GO:1901605	alpha-amino acid metabolic process	0.04267	null	null	6.327	-9.3134	0.713	0.691	32787	1
GO:0008652	cellular amino acid biosynthetic process	0.03697	null	null	6.265	-17.0958	0.659	0.839	32787	1
GO:0006520	cellular amino acid metabolic process	0.06437	null	null	6.505	-3.3945	0.699	0.837	32787	1
GO:0043436	oxoacid metabolic process	0.09211	null	null	6.661	-35.3401	0.716	0.788	32787	1
GO:0006090	pyruvate metabolic process	0.00725	null	null	5.557	-19.9788	0.789	0.503	32787	1
GO:1901135	carbohydrate derivative metabolic process	0.11649	4.918	-1.729	6.763	-2.3083	0.908	0.155	1901135	0
GO:0072524	pyridine-containing compound metabolic process	0.0089	4.474	6.853	5.646	-20.3197	0.84	0.155	72524	0
GO:0006629	lipid metabolic process	0.03094	-5.295	2.489	6.187	-16.4389	0.851	0.155	6629	0
GO:0097659	nucleic acid-templated transcription	0.00772	5.888	4.506	5.584	-104.893	0.761	0.178	97659	0
GO:0005976	polysaccharide metabolic process	0.0108	7.498	-0.907	5.73	-51.7645	0.844	0.186	5976	0
GO:0044723	single-organism carbohydrate metabolic process	0.03597	null	null	6.253	-46.767	0.8	0.674	5976	1
GO:0044724	single-organism carbohydrate catabolic process	0.01202	null	null	5.777	-3.8662	0.79	0.746	5976	1
GO:0016052	carbohydrate catabolic process	0.01351	null	null	5.827	-12.6289	0.842	0.694	5976	1
GO:0016051	carbohydrate biosynthetic process	0.01539	null	null	5.884	-28.8477	0.743	0.706	5976	1
GO:0000271	polysaccharide biosynthetic process	0.00892	null	null	5.647	-7.5498	0.717	0.936	5976	1
GO:0044264	cellular polysaccharide metabolic process	0.00782	null	null	5.59	-16.4724	0.808	0.91	5976	1
GO:0044262	cellular carbohydrate metabolic process	0.01835	null	null	5.96	-21.7447	0.844	0.723	5976	1
GO:0044042	glucan metabolic process	0.00239	null	null	5.074	-11.8239	0.855	0.812	5976	1
GO:0030243	cellulose metabolic process	0.00046	null	null	4.357	-2.4095	0.848	0.878	5976	1
GO:0009250	glucan biosynthetic process	0.00147	null	null	4.865	-3.294	0.739	0.959	5976	1
GO:0006006	glucose metabolic process	0.00741	null	null	5.567	-4.2782	0.826	0.706	5976	1
GO:0006073	cellular glucan metabolic process	0.00238	null	null	5.074	-9.0526	0.825	0.873	5976	1
GO:0005996	monosaccharide metabolic process	0.01214	null	null	5.781	-8.8477	0.817	0.747	5976	1
GO:0034637	cellular carbohydrate biosynthetic process	0.00744	null	null	5.568	-4.2612	0.737	0.831	5976	1
GO:0005984	disaccharide metabolic process	0.0019	null	null	4.976	-7.3526	0.823	0.698	5976	1
GO:0033692	cellular polysaccharide biosynthetic process	0.00681	null	null	5.53	-16.3325	0.703	0.556	5976	1
GO:0052249	modulation of RNA levels in other organism involved in symbiotic interaction	2e-05	4.15	-5.713	2.953	-45.2366	0.93	0.188	52249	0
GO:0044265	cellular macromolecule catabolic process	0.01109	8.085	0.225	5.742	-16.4724	0.826	0.191	44265	0
GO:0044257	cellular protein catabolic process	0.0022	null	null	5.039	-9.857	0.835	0.761	44265	1
GO:0043632	modification-dependent macromolecule catabolic process	0.00135	null	null	4.828	-5.4802	0.857	0.728	44265	1
GO:0051603	proteolysis involved in cellular protein catabolic process	0.00218	null	null	5.036	-5.8013	0.835	0.916	44265	1
GO:0034641	cellular nitrogen compound metabolic process	0.33428	4.52	5.613	7.221	-293.211	0.807	0.201	34641	0
GO:0006139	nucleobase-containing compound metabolic process	0.29917	null	null	7.173	-237.371	0.757	0.507	34641	1
GO:0090304	nucleic acid metabolic process	0.20158	null	null	7.001	-191.33	0.727	0.528	34641	1
GO:1901137	carbohydrate derivative biosynthetic process	0.03915	1.092	7.619	6.29	-16.699	0.812	0.218	1901137	0
GO:0044272	sulfur compound biosynthetic process	0.01342	1.928	8.101	5.825	-3.9326	0.856	0.22	44272	0
GO:0044281	small molecule metabolic process	0.215	-5.597	3.137	7.029	-119.903	0.85	0.225	44281	0
GO:1901360	organic cyclic compound metabolic process	0.33913	4.868	0.504	7.227	-197.706	0.888	0.23	1901360	0
GO:0032970	regulation of actin filament-based process	0.00032	4.352	-5.212	4.198	-37.8153	0.851	0.239	32970	0
GO:0006725	cellular aromatic compound metabolic process	0.33051	2.796	3.982	7.216	-244.733	0.866	0.259	6725	0
GO:0046483	heterocycle metabolic process	0.33326	3.371	4.209	7.22	-147.928	0.865	0.26	46483	0
GO:0016311	dephosphorylation	0.00777	-4.376	6.044	5.587	-10.2262	0.859	0.265	16311	0
GO:0046031	ADP metabolic process	2e-05	-1.806	7.101	3.017	-9.857	0.808	0.271	46031	0
GO:0006165	nucleoside diphosphate phosphorylation	0.00044	null	null	4.336	-8.5591	0.738	0.699	46031	1
GO:0009135	purine nucleoside diphosphate metabolic process	2e-05	null	null	3.072	-5.1831	0.82	0.704	46031	1
GO:0006757	ADP phosphorylation	0	null	null	1.531	-3.4664	0.808	0.852	46031	1
GO:0009132	nucleoside diphosphate metabolic process	0.00153	-1.372	6.355	4.881	-10.7011	0.765	0.29	9132	0
GO:0008380	RNA splicing	0.00097	7.702	2.826	4.683	-4.4685	0.84	0.291	8380	0
GO:0050790	regulation of catalytic activity	0.00651	4.842	-5.069	5.51	-15.6383	0.87	0.291	50790	0
GO:0016192	vesicle-mediated transport	0.00381	-4.255	-4.338	5.277	-2.878	0.934	0.298	16192	0
GO:0043604	amide biosynthetic process	0.00553	3.88	7.476	5.439	-41.266	0.818	0.309	43604	0
GO:0043043	peptide biosynthetic process	0.00209	null	null	5.017	-38.4535	0.809	0.819	43604	1
GO:0006518	peptide metabolic process	0.00323	null	null	5.206	-33.1013	0.851	0.852	43604	1
GO:0044260	cellular macromolecule metabolic process	0.28588	6.661	1.436	7.153	-300	0.786	0.313	44260	0
GO:0046907	intracellular transport	0.00739	-4.567	-4.198	5.566	-34.4881	0.897	0.32	46907	0
GO:0032940	secretion by cell	0.00618	null	null	5.487	-4.475	0.807	0.829	46907	1
GO:0007034	vacuolar transport	6e-05	null	null	3.498	-6.0209	0.891	0.569	46907	1
GO:0006405	RNA export from nucleus	0.00072	null	null	4.552	-2.8962	0.902	0.682	46907	1
GO:0051649	establishment of localization in cell	0.01489	null	null	5.87	-30.8041	0.891	0.887	46907	1
GO:0055114	oxidation-reduction process	0.15044	-6.056	2.952	6.874	-24.3063	0.858	0.328	55114	0
GO:0009416	response to light stimulus	0.00083	-0.346	-5.762	4.616	-15.2027	0.937	0.33	9416	0
GO:0009266	response to temperature stimulus	0.00147	null	null	4.863	-14.0742	0.934	0.851	9416	1
GO:0009314	response to radiation	0.00092	null	null	4.659	-16.7305	0.936	0.817	9416	1
GO:0006972	hyperosmotic response	0.00016	null	null	3.904	-4.0146	0.939	0.727	9416	1
GO:0009409	response to cold	0.00024	null	null	4.074	-2.9202	0.938	0.745	9416	1
GO:0071495	cellular response to endogenous stimulus	0.00091	-0.333	-5.785	4.656	-66.7852	0.937	0.332	71495	0
GO:0032870	cellular response to hormone stimulus	0.00062	null	null	4.488	-4.475	0.899	0.951	71495	1
GO:0009755	hormone-mediated signaling pathway	0.00046	null	null	4.363	-6.2441	0.792	0.924	71495	1
GO:0009725	response to hormone	0.00077	null	null	4.584	-18.5969	0.928	0.957	71495	1
GO:0051156	glucose 6-phosphate metabolic process	0.00043	-2.217	5.013	4.331	-3.1345	0.855	0.346	51156	0
GO:0072522	purine-containing compound biosynthetic process	0.01594	3.046	7.199	5.899	-6.2441	0.76	0.349	72522	0
GO:0009163	nucleoside biosynthetic process	0.01665	null	null	5.918	-3.0576	0.652	0.978	72522	1
GO:0046129	purine ribonucleoside biosynthetic process	0.01074	null	null	5.728	-3.4837	0.667	0.932	72522	1
GO:0042455	ribonucleoside biosynthetic process	0.01646	null	null	5.913	-6.2441	0.652	0.523	72522	1
GO:0043412	macromolecule modification	0.05091	7.87	-0.225	6.404	-210.32	0.87	0.354	43412	0
GO:0010033	response to organic substance	0.00287	-0.34	-6.321	5.155	-25.4989	0.933	0.363	10033	0
GO:1901700	response to oxygen-containing compound	0.00312	null	null	5.191	-21.4609	0.933	0.7	10033	1
GO:0070887	cellular response to chemical stimulus	0.00495	null	null	5.392	-10.2262	0.893	0.734	10033	1
GO:0071310	cellular response to organic substance	0.00211	null	null	5.021	-10.7011	0.896	0.677	10033	1
GO:0044249	cellular biosynthetic process	0.28205	2.496	6.949	7.147	-273.703	0.779	0.369	44249	0
GO:0009059	macromolecule biosynthetic process	0.17669	null	null	6.944	-97.5031	0.771	0.554	44249	1
GO:0044271	cellular nitrogen compound biosynthetic process	0.15794	null	null	6.895	-198.104	0.75	0.534	44249	1
GO:1901576	organic substance biosynthetic process	0.28886	null	null	7.157	-249.845	0.797	0.663	44249	1
GO:0019438	aromatic compound biosynthetic process	0.15562	null	null	6.889	-110.924	0.759	0.532	44249	1
GO:0018130	heterocycle biosynthetic process	0.1615	null	null	6.905	-146.141	0.756	0.538	44249	1
GO:1901362	organic cyclic compound biosynthetic process	0.16583	null	null	6.916	-10.8665	0.773	0.543	44249	1
GO:0010604	positive regulation of macromolecule metabolic process	0.00306	6.256	-3.325	5.182	-12.3778	0.791	0.379	10604	0
GO:1902680	positive regulation of RNA biosynthetic process	0.00196	null	null	4.989	-7.3526	0.704	0.992	10604	1
GO:0031328	positive regulation of cellular biosynthetic process	0.00255	null	null	5.103	-8.0969	0.767	0.971	10604	1
GO:0031325	positive regulation of cellular metabolic process	0.00316	null	null	5.197	-10.6326	0.802	0.989	10604	1
GO:0051254	positive regulation of RNA metabolic process	0.00198	null	null	4.993	-2.2822	0.735	0.993	10604	1
GO:0045935	positive regulation of nucleobase-containing compound metabolic process	0.00206	null	null	5.012	-9.5817	0.759	0.954	10604	1
GO:0010557	positive regulation of macromolecule biosynthetic process	0.0025	null	null	5.094	-5.8013	0.756	0.994	10604	1
GO:0009891	positive regulation of biosynthetic process	0.00257	null	null	5.107	-3.0714	0.805	0.971	10604	1
GO:0051173	positive regulation of nitrogen compound metabolic process	0.00208	null	null	5.015	-10.9508	0.813	0.954	10604	1
GO:0019682	glyceraldehyde-3-phosphate metabolic process	0.00152	-3.398	5.92	4.878	-13.4609	0.805	0.39	19682	0
GO:0043102	amino acid salvage	0.00061	-0.251	7.825	4.484	-2.2511	0.774	0.392	43102	0
GO:0090407	organophosphate biosynthetic process	0.04455	0.315	6.979	6.346	-31.4815	0.736	0.393	90407	0
GO:0032774	RNA biosynthetic process	0.09294	null	null	6.665	-47.1379	0.675	0.712	90407	1
GO:0006796	phosphate-containing compound metabolic process	0.16693	null	null	6.919	-190.105	0.789	0.603	90407	1
GO:0016310	phosphorylation	0.063	null	null	6.496	-118.77	0.817	0.649	90407	1
GO:0009116	nucleoside metabolic process	0.08228	null	null	6.612	-19.2457	0.643	0.896	90407	1
GO:0009124	nucleoside monophosphate biosynthetic process	0.01559	null	null	5.89	-3.9326	0.642	0.895	90407	1
GO:0009123	nucleoside monophosphate metabolic process	0.06477	null	null	6.508	-3.911	0.645	0.767	90407	1
GO:0009126	purine nucleoside monophosphate metabolic process	0.06008	null	null	6.476	-22.2418	0.644	0.699	90407	1
GO:0009127	purine nucleoside monophosphate biosynthetic process	0.01098	null	null	5.737	-3.9326	0.655	0.856	90407	1
GO:0006163	purine nucleotide metabolic process	0.07644	null	null	6.58	-17.2197	0.626	0.896	90407	1
GO:0009144	purine nucleoside triphosphate metabolic process	0.06477	null	null	6.508	-22.059	0.642	0.751	90407	1
GO:0009141	nucleoside triphosphate metabolic process	0.06724	null	null	6.524	-24.2823	0.643	0.767	90407	1
GO:0009150	purine ribonucleotide metabolic process	0.07456	null	null	6.569	-23.1818	0.62	0.89	90407	1
GO:0009161	ribonucleoside monophosphate metabolic process	0.06356	null	null	6.5	-4.1713	0.641	0.919	90407	1
GO:0009167	purine ribonucleoside monophosphate metabolic process	0.06007	null	null	6.475	-2.1722	0.644	0.922	90407	1
GO:0009165	nucleotide biosynthetic process	0.0278	null	null	6.141	-7.0419	0.621	0.558	90407	1
GO:0006753	nucleoside phosphate metabolic process	0.09897	null	null	6.692	-22.9469	0.627	0.805	90407	1
GO:0046034	ATP metabolic process	0.05374	null	null	6.427	-7.9788	0.628	0.893	90407	1
GO:1901657	glycosyl compound metabolic process	0.0826	null	null	6.614	-15.7122	0.795	0.755	90407	1
GO:0009201	ribonucleoside triphosphate biosynthetic process	0.0059	null	null	5.467	-4.4685	0.677	0.795	90407	1
GO:0009199	ribonucleoside triphosphate metabolic process	0.0656	null	null	6.514	-5.7825	0.641	0.922	90407	1
GO:0046128	purine ribonucleoside metabolic process	0.0732	null	null	6.561	-18.2182	0.645	0.887	90407	1
GO:0042278	purine nucleoside metabolic process	0.07358	null	null	6.564	-24.2823	0.645	0.738	90407	1
GO:0009205	purine ribonucleoside triphosphate metabolic process	0.06477	null	null	6.508	-16.2211	0.642	0.92	90407	1
GO:0009260	ribonucleotide biosynthetic process	0.01766	null	null	5.944	-6.2441	0.631	0.91	90407	1
GO:0009259	ribonucleotide metabolic process	0.07844	null	null	6.591	-25.4225	0.628	0.909	90407	1
GO:0019637	organophosphate metabolic process	0.11968	null	null	6.775	-65.8041	0.782	0.755	90407	1
GO:0044283	small molecule biosynthetic process	0.05873	null	null	6.466	-33.2899	0.734	0.568	90407	1
GO:0019693	ribose phosphate metabolic process	0.07902	null	null	6.595	-26.8962	0.747	0.683	90407	1
GO:0034654	nucleobase-containing compound biosynthetic process	0.13019	null	null	6.811	-55.3706	0.71	0.559	90407	1
GO:0006082	organic acid metabolic process	0.09359	-2.859	4.724	6.668	-73.3298	0.74	0.393	6082	0
GO:0006812	cation transport	0.03981	-4.739	-3.872	6.297	-32.2916	0.843	0.394	6812	0
GO:0055085	transmembrane transport	0.09397	null	null	6.67	-13.2636	0.775	0.811	6812	1
GO:0006818	hydrogen transport	0.01975	null	null	5.992	-8.466	0.864	0.507	6812	1
GO:0006810	transport	0.17382	null	null	6.937	-152.137	0.899	0.579	6812	1
GO:0006811	ion transport	0.05991	null	null	6.474	-40.9626	0.845	0.631	6812	1
GO:0044765	single-organism transport	0.12592	null	null	6.797	-41.1746	0.829	0.753	6812	1
GO:0071702	organic substance transport	0.05487	null	null	6.436	-22.9431	0.913	0.619	6812	1
GO:0015985	energy coupled proton transport, down electrochemical gradient	0.0045	null	null	5.35	-17.2226	0.83	0.613	6812	1
GO:0098662	inorganic cation transmembrane transport	0.02309	null	null	6.06	-10.7011	0.799	0.839	6812	1
GO:0098655	cation transmembrane transport	0.02858	null	null	6.153	-6.3862	0.795	0.864	6812	1
GO:0098660	inorganic ion transmembrane transport	0.02581	null	null	6.108	-6.0535	0.798	0.769	6812	1
GO:0030001	metal ion transport	0.01471	null	null	5.864	-14.1512	0.857	0.791	6812	1
GO:0015672	monovalent inorganic cation transport	0.02709	null	null	6.13	-14.1586	0.847	0.775	6812	1
GO:0034220	ion transmembrane transport	0.03995	null	null	6.298	-6.9747	0.79	0.821	6812	1
GO:0016128	phytosteroid metabolic process	2e-05	-4.767	4.107	3.093	-10.055	0.859	0.396	16128	0
GO:0071496	cellular response to external stimulus	0.00511	-0.233	-5.999	5.406	-9.4123	0.939	0.398	71496	0
GO:0006396	RNA processing	0.02784	6.889	3.298	6.141	-33.4306	0.773	0.406	6396	0
GO:0071705	nitrogen compound transport	0.02072	-3.964	-4.794	6.013	-8.0325	0.922	0.407	71705	0
GO:0046939	nucleotide phosphorylation	0.00262	-1.106	6.566	5.114	-7.1349	0.752	0.413	46939	0
GO:0006952	defense response	0.00569	-0.282	-6.142	5.452	-7.3526	0.936	0.424	6952	0
GO:0045087	innate immune response	0.00137	null	null	4.832	-2.4541	0.943	0.52	6952	1
GO:1901564	organonitrogen compound metabolic process	0.19565	5.996	5.503	6.988	-94.71	0.84	0.428	1901564	0
GO:0032268	regulation of cellular protein metabolic process	0.00691	6.656	-2.56	5.536	-2.1331	0.762	0.431	32268	0
GO:0046903	secretion	0.00627	-4.351	-4.507	5.494	-6.6038	0.879	0.437	46903	0
GO:0051246	regulation of protein metabolic process	0.00876	6.524	-2.856	5.639	-11.8239	0.781	0.443	51246	0
GO:0019538	protein metabolic process	0.12328	7.474	0.273	6.788	-268.47	0.842	0.448	19538	0
GO:0042592	homeostatic process	0.0097	4.557	-5.392	5.683	-22.0044	0.889	0.451	42592	0
GO:0019725	cellular homeostasis	0.00804	null	null	5.602	-14.0742	0.804	0.742	42592	1
GO:1901566	organonitrogen compound biosynthetic process	0.09297	3.316	6.868	6.665	-96.2526	0.77	0.457	1901566	0
GO:0072521	purine-containing compound metabolic process	0.08058	null	null	6.603	-8.8794	0.785	0.536	1901566	1
GO:0016070	RNA metabolic process	0.13709	6.035	3.291	6.834	-117.939	0.728	0.463	16070	0
GO:0006259	DNA metabolic process	0.06339	null	null	6.499	-34.0675	0.759	0.539	16070	1
GO:0010256	endomembrane system organization	0.00029	-1.876	-1.499	4.156	-3.3565	0.911	0.47	10256	0
GO:0006399	tRNA metabolic process	0.02533	6.95	3.163	6.1	-6.0209	0.779	0.473	6399	0
GO:1903506	regulation of nucleic acid-templated transcription	0.01447	5.768	2.777	5.857	-45.5591	0.661	0.474	1903506	0
GO:0080090	regulation of primary metabolic process	0.09601	null	null	6.679	-112.284	0.776	0.874	1903506	1
GO:0031323	regulation of cellular metabolic process	0.09519	null	null	6.675	-113.971	0.751	0.623	1903506	1
GO:0031326	regulation of cellular biosynthetic process	0.08997	null	null	6.651	-96.9788	0.691	0.909	1903506	1
GO:0051252	regulation of RNA metabolic process	0.08531	null	null	6.628	-89.1952	0.636	0.873	1903506	1
GO:2001141	regulation of RNA biosynthetic process	0.08441	null	null	6.623	-88.0209	0.589	0.898	1903506	1
GO:0019219	regulation of nucleobase-containing compound metabolic process	0.08824	null	null	6.642	-88.4609	0.673	0.905	1903506	1
GO:0006355	regulation of transcription, DNA-templated	0.08419	null	null	6.622	-16.3757	0.575	1.978	1903506	1
GO:0006351	transcription, DNA-templated	0.09014	null	null	6.652	-92.9393	0.655	1.453	1903506	1
GO:0010556	regulation of macromolecule biosynthetic process	0.08978	null	null	6.65	-90.6144	0.673	0.909	1903506	1
GO:0010468	regulation of gene expression	0.09331	null	null	6.667	-48.1397	0.725	0.881	1903506	1
GO:2000112	regulation of cellular macromolecule biosynthetic process	0.08951	null	null	6.649	-97.4306	0.645	0.862	1903506	1
GO:0060255	regulation of macromolecule metabolic process	0.09695	null	null	6.683	-88.2541	0.73	0.878	1903506	1
GO:0009889	regulation of biosynthetic process	0.09	null	null	6.651	-42.5467	0.751	0.863	1903506	1
GO:0051171	regulation of nitrogen compound metabolic process	0.08828	null	null	6.643	-100.967	0.759	0.859	1903506	1
GO:0044282	small molecule catabolic process	0.01347	-3.849	4.455	5.826	-13.8356	0.816	0.48	44282	0
GO:0044712	single-organism catabolic process	0.07763	null	null	6.587	-35.7258	0.83	0.858	44282	1
GO:0016054	organic acid catabolic process	0.01144	null	null	5.755	-3.3565	0.753	0.537	44282	1
GO:0009057	macromolecule catabolic process	0.01643	null	null	5.912	-7.2604	0.856	0.503	44282	1
GO:0044248	cellular catabolic process	0.07945	null	null	6.597	-40.3251	0.853	0.862	44282	1
GO:1901575	organic substance catabolic process	0.09316	null	null	6.666	-44.3439	0.868	0.653	44282	1
GO:0046700	heterocycle catabolic process	0.06219	null	null	6.49	-2.1812	0.808	0.821	44282	1
GO:0015849	organic acid transport	0.01351	-4.027	-4.459	5.828	-17.2426	0.864	0.481	15849	0
GO:0034660	ncRNA metabolic process	0.03209	6.675	3.216	6.203	-5.1818	0.772	0.488	34660	0
GO:0010467	gene expression	0.16702	7.549	0.579	6.92	-200.544	0.843	0.493	10467	0
GO:0009069	serine family amino acid metabolic process	0.00643	-1.005	7.466	5.505	-4.4685	0.769	0.496	9069	0
GO:0044711	single-organism biosynthetic process	0.12458	-2.28	6.675	6.792	-105.21	0.787	0.497	44711	0

## Sheet: DMhypogenes_Leaf_CC
REVIGO analysis for GO enrichment from differentially hypomethylated genes in leaves: cellular components (CC)
term_ID	description	frequency	plot_X	plot_Y	plot_size	log10 p-value	uniqueness	dispensability	representative	eliminated
GO:0009536	plastid	0.0159	4.012	3.162	5.573	-149.738	0.374	0	9536	0
GO:0009507	chloroplast	0.0145	null	null	5.531	-12.5591	0.305	0.805	9536	1
GO:0044391	ribosomal subunit	0.0136	null	null	5.504	-6.1694	0.289	0.664	9536	1
GO:0031967	organelle envelope	0.0248	null	null	5.765	-7.4461	0.299	0.607	9536	1
GO:0005773	vacuole	0.0011	null	null	4.402	-18.5969	0.481	0.403	9536	1
GO:0031976	plastid thylakoid	0.0022	null	null	4.71	-34.2976	0.217	0.985	9536	1
GO:0005634	nucleus	0.0281	null	null	5.819	-29.9914	0.357	0.573	9536	1
GO:0070013	intracellular organelle lumen	0.005	null	null	5.073	-17.5867	0.389	0.514	9536	1
GO:0031984	organelle subcompartment	0.0023	null	null	4.738	-58.6655	0.406	0.445	9536	1
GO:0031981	nuclear lumen	0.0044	null	null	5.012	-10.762	0.36	0.982	9536	1
GO:0044435	plastid part	0.0028	null	null	4.817	-92.7212	0.336	0.441	9536	1
GO:0044434	chloroplast part	0.0028	null	null	4.815	-78.5171	0.295	0.692	9536	1
GO:0009534	chloroplast thylakoid	0.0022	null	null	4.71	-15.8297	0.217	0.995	9536	1
GO:0044427	chromosomal part	0.0045	null	null	5.024	-8.0969	0.382	0.508	9536	1
GO:0044428	nuclear part	0.0065	null	null	5.18	-28.8182	0.358	0.486	9536	1
GO:0009526	plastid envelope	0.0004	null	null	3.954	-3.3311	0.362	0.853	9536	1
GO:0043231	intracellular membrane-bounded organelle	0.0885	null	null	6.318	-300	0.296	0.767	9536	1
GO:0009532	plastid stroma	0.0005	null	null	4.07	-18.719	0.359	0.87	9536	1
GO:0005739	mitochondrion	0.0381	null	null	5.952	-7.3526	0.329	0.646	9536	1
GO:0005740	mitochondrial envelope	0.0233	null	null	5.738	-6.2441	0.287	0.729	9536	1
GO:0005794	Golgi apparatus	0.0027	null	null	4.794	-2.2685	0.45	0.439	9536	1
GO:0055035	plastid thylakoid membrane	0.0021	null	null	4.697	-32.9788	0.217	0.974	9536	1
GO:0031461	cullin-RING ubiquitin ligase complex	0.0005	3.431	-5.481	4.08	-3.3644	0.747	0.08	31461	0
GO:0042651	thylakoid membrane	0.0031	-4.973	-3.643	4.859	-56.5058	0.572	0.094	42651	0
GO:0009521	photosystem	0.0021	null	null	4.701	-33.2262	0.514	0.927	42651	1
GO:0009523	photosystem II	0.0016	null	null	4.566	-5.1487	0.523	0.903	42651	1
GO:0044436	thylakoid part	0.004	null	null	4.97	-39.8182	0.569	0.967	42651	1
GO:0009579	thylakoid	0.0041	-5.365	4.185	4.985	-37.109	0.785	0.097	9579	0
GO:0005737	cytoplasm	0.3816	-1.456	0.598	6.952	-298.521	0.68	0.183	5737	0
GO:0005938	cell cortex	0.0009	3.205	6.305	4.344	-7.3526	0.66	0.31	5938	0
GO:0044444	cytoplasmic part	0.1361	-0.728	2.616	6.505	-291.062	0.684	0.316	44444	0
GO:0030529	ribonucleoprotein complex	0.0609	1.602	-2.902	6.155	-17.9355	0.657	0.319	30529	0
GO:0005856	cytoskeleton	0.0071	6.338	1.6	5.224	-12.6289	0.467	0.342	5856	0
GO:0015630	microtubule cytoskeleton	0.0039	null	null	4.967	-9.857	0.473	0.452	5856	1
GO:0005840	ribosome	0.0576	null	null	6.131	-9.857	0.307	0.835	5856	1
GO:0005694	chromosome	0.0097	null	null	5.359	-10.7011	0.455	0.495	5856	1
GO:0044430	cytoskeletal part	0.0058	null	null	5.134	-6.821	0.357	0.918	5856	1
GO:0043232	intracellular non-membrane-bounded organelle	0.0768	null	null	6.256	-29.8182	0.358	0.629	5856	1
GO:0030120	vesicle coat	0.0004	4.875	-0.697	4.001	-25.8508	0.386	0.372	30120	0
GO:0098588	bounding membrane of organelle	0.004	null	null	4.968	-9.6459	0.417	0.526	30120	1

## Sheet: DMhypogenes_Leaf_MF
REVIGO analysis for GO enrichment from differentially hypomethylated genes in leaves: molecular functions (MF)
term_ID	description	frequency	plot_X	plot_Y	plot_size	log10 p-value	uniqueness	dispensability	representative	eliminated
GO:0016773	phosphotransferase activity, alcohol group as acceptor	0.0404	-6.235	-1.784	6.281	-113.921	0.813	0	16773	0
GO:0016772	transferase activity, transferring phosphorus-containing groups	0.0919	null	null	6.638	-144.353	0.829	0.42	16773	1
GO:0016301	kinase activity	0.0508	null	null	6.381	-99.475	0.809	0.701	16773	1
GO:0016779	nucleotidyltransferase activity	0.0293	null	null	6.142	-16.4724	0.819	0.643	16773	1
GO:0004672	protein kinase activity	0.0188	null	null	5.948	-76.8125	0.826	0.603	16773	1
GO:0034062	RNA polymerase activity	0.009	null	null	5.627	-8.466	0.837	0.547	16773	1
GO:0050662	coenzyme binding	0.0457	-6.109	3.727	6.334	-10.7011	0.91	0	50662	0
GO:0016879	ligase activity, forming carbon-nitrogen bonds	0.0168	-1.831	-8.128	5.901	-8.466	0.943	0.031	16879	0
GO:0016616	oxidoreductase activity, acting on the CH-OH group of donors, NAD or NADP as acceptor	0.0193	4.477	1.45	5.96	-6.4976	0.914	0.031	16616	0
GO:0016820	hydrolase activity, acting on acid anhydrides, catalyzing transmembrane movement of substances	0.0203	4.668	-3.791	5.983	-65.762	0.632	0.032	16820	0
GO:0070035	purine NTP-dependent helicase activity	0.005	null	null	5.374	-3.6465	0.757	0.519	16820	1
GO:0022804	active transmembrane transporter activity	0.0387	null	null	6.263	-3.1336	0.841	0.703	16820	1
GO:0015405	P-P-bond-hydrolysis-driven transmembrane transporter activity	0.0206	null	null	5.99	-2.5689	0.835	0.969	16820	1
GO:0016818	hydrolase activity, acting on acid anhydrides, in phosphorus-containing anhydrides	0.0751	null	null	6.551	-7.5622	0.682	0.912	16820	1
GO:0015399	primary active transmembrane transporter activity	0.0206	null	null	5.99	-9.5817	0.839	0.641	16820	1
GO:0043492	ATPase activity, coupled to movement of substances	0.0191	null	null	5.955	-9.5817	0.716	0.745	16820	1
GO:0004386	helicase activity	0.0117	null	null	5.743	-12.0482	0.737	0.572	16820	1
GO:0016887	ATPase activity	0.0523	null	null	6.394	-4.466	0.692	0.86	16820	1
GO:0042626	ATPase activity, coupled to transmembrane movement of substances	0.019	null	null	5.954	-2.4541	0.612	0.87	16820	1
GO:0042623	ATPase activity, coupled	0.0288	null	null	6.134	-12.983	0.707	0.642	16820	1
GO:0015077	monovalent inorganic cation transmembrane transporter activity	0.0261	null	null	6.091	-4.2692	0.842	0.805	16820	1
GO:0016462	pyrophosphatase activity	0.0743	null	null	6.546	-3.4517	0.682	0.92	16820	1
GO:0008324	cation transmembrane transporter activity	0.039	null	null	6.265	-14.1938	0.837	0.64	16820	1
GO:0017111	nucleoside-triphosphatase activity	0.0707	null	null	6.525	-15.7595	0.683	0.777	16820	1
GO:0022891	substrate-specific transmembrane transporter activity	0.0672	null	null	6.502	-30.032	0.831	0.816	16820	1
GO:0008092	cytoskeletal protein binding	0.0016	-1.312	-6.695	4.885	-7.0218	0.92	0.055	8092	0
GO:0015631	tubulin binding	0.0007	null	null	4.495	-6.2441	0.923	0.524	8092	1
GO:0032561	guanyl ribonucleotide binding	0.0174	-3.311	5.552	5.915	-8.767	0.786	0.073	32561	0
GO:0017076	purine nucleotide binding	0.1599	null	null	6.879	-204.656	0.729	0.695	32561	1
GO:0030554	adenyl nucleotide binding	0.1435	null	null	6.832	-237.111	0.723	0.675	32561	1
GO:0035639	purine ribonucleoside triphosphate binding	0.1548	null	null	6.865	-226.274	0.749	0.689	32561	1
GO:0000166	nucleotide binding	0.2035	null	null	6.983	-285.939	0.716	0.744	32561	1
GO:0032559	adenyl ribonucleotide binding	0.1395	null	null	6.82	-220.505	0.706	0.793	32561	1
GO:0032550	purine ribonucleoside binding	0.1554	null	null	6.866	-245.136	0.719	0.817	32561	1
GO:0032549	ribonucleoside binding	0.1566	null	null	6.87	-256.565	0.718	0.839	32561	1
GO:0032555	purine ribonucleotide binding	0.1559	null	null	6.868	-230.003	0.701	0.817	32561	1
GO:0032553	ribonucleotide binding	0.1629	null	null	6.887	-267.164	0.704	0.512	32561	1
GO:0001883	purine nucleoside binding	0.1555	null	null	6.867	-258.296	0.719	0.837	32561	1
GO:0001882	nucleoside binding	0.1574	null	null	6.872	-256.168	0.719	0.819	32561	1
GO:0051536	iron-sulfur cluster binding	0.0261	-0.399	-1.828	6.092	-4.4685	0.916	0.077	51536	0
GO:0043169	cation binding	0.1581	2.405	4.346	6.874	-207.873	0.876	0.106	43169	0
GO:0008135	translation factor activity, RNA binding	0.0084	4.329	5.42	5.597	-2.9202	0.882	0.112	8135	0
GO:0046906	tetrapyrrole binding	0.0191	1.471	6.833	5.955	-7.7167	0.882	0.123	46906	0
GO:1901265	nucleoside phosphate binding	0.2035	-0.634	5.966	6.983	-188.625	0.835	0.178	1901265	0
GO:0019787	ubiquitin-like protein transferase activity	0.0001	-3.934	-3.087	3.712	-7.6819	0.897	0.191	19787	0
GO:0008170	N-methyltransferase activity	0.0045	-6.193	-0.588	5.33	-12.5229	0.87	0.273	8170	0
GO:0016758	transferase activity, transferring hexosyl groups	0.006	-5.377	-3.909	5.453	-14.0742	0.854	0.282	16758	0
GO:0008194	UDP-glycosyltransferase activity	0.0019	null	null	4.945	-6.0209	0.865	0.698	16758	1
GO:0004553	hydrolase activity, hydrolyzing O-glycosyl compounds	0.0116	4.3	-3.511	5.739	-7.0419	0.806	0.286	4553	0
GO:0022835	transmitter-gated channel activity	0	1.092	-7.392	2.55	-3.2608	0.908	0.291	22835	0
GO:0016798	hydrolase activity, acting on glycosyl bonds	0.0161	4.101	-4.935	5.881	-25.4225	0.8	0.297	16798	0
GO:0003723	RNA binding	0.0586	-1.14	5.387	6.443	-20.9393	0.852	0.313	3723	0
GO:0003677	DNA binding	0.1392	null	null	6.819	-18.5969	0.832	0.497	3723	1
GO:0003676	nucleic acid binding	0.2175	-0.135	5.643	7.012	-165.371	0.833	0.317	3676	0
GO:0070011	peptidase activity, acting on L-amino acid peptides	0.0302	4.695	-4.706	6.155	-16.1221	0.773	0.323	70011	0
GO:0004175	endopeptidase activity	0.0183	null	null	5.937	-11.7077	0.784	0.854	70011	1
GO:0016757	transferase activity, transferring glycosyl groups	0.0175	-5.866	-3.147	5.917	-16.1778	0.854	0.324	16757	0
GO:0004518	nuclease activity	0.0263	5.202	-4.333	6.095	-7.3526	0.762	0.334	4518	0
GO:0016791	phosphatase activity	0.0075	null	null	5.551	-2.4709	0.781	0.819	4518	1
GO:0042578	phosphoric ester hydrolase activity	0.0106	null	null	5.701	-3.5237	0.781	0.701	4518	1
GO:0004721	phosphoprotein phosphatase activity	0.0023	null	null	5.032	-6.0209	0.8	0.59	4518	1
GO:0016747	transferase activity, transferring acyl groups other than amino-acyl groups	0.0254	-5.475	-2.224	6.08	-3.659	0.849	0.342	16747	0
GO:0008233	peptidase activity	0.0361	5.567	-3.718	6.232	-9.1518	0.782	0.35	8233	0
GO:0016741	transferase activity, transferring one-carbon groups	0.0319	-5.714	-1.416	6.179	-11.8239	0.846	0.353	16741	0
GO:0016746	transferase activity, transferring acyl groups	0.0324	-6.154	-2.437	6.185	-15.2027	0.845	0.354	16746	0
GO:0016655	oxidoreductase activity, acting on NAD(P)H, quinone or similar compound as acceptor	0.0086	5.566	1.826	5.608	-3.0576	0.904	0.376	16655	0
GO:0003954	NADH dehydrogenase activity	0.0079	null	null	5.573	-2.757	0.904	0.885	16655	1
GO:0016788	hydrolase activity, acting on ester bonds	0.049	5.719	-3.227	6.365	-3.7532	0.775	0.377	16788	0
GO:0016817	hydrolase activity, acting on acid anhydrides	0.0756	null	null	6.553	-77.4737	0.763	0.426	16788	1
GO:0019001	guanyl nucleotide binding	0.0174	-3.508	5.135	5.915	-9.5817	0.799	0.38	19001	0
GO:0046872	metal ion binding	0.1549	1.335	3.587	6.865	-150.764	0.867	0.395	46872	0
GO:0046914	transition metal ion binding	0.0734	null	null	6.54	-121.128	0.879	0.694	46872	1
GO:0016651	oxidoreductase activity, acting on NAD(P)H	0.0135	6.29	2.041	5.805	-4.8013	0.916	0.397	16651	0

## Sheet: DMhypogenes_root_BP
REVIGO analysis for GO enrichment from differentially hypomethylated genes in roots: biological process (BP)
term_ID	description	frequency	plot_X	plot_Y	plot_size	log10 p-value	uniqueness	dispensability	representative	eliminated
GO:1901576	organic substance biosynthetic process	0.2889	4.221	-0.697	7.157	-8.71	0.546	0.224	1901576	0
GO:0034641	cellular nitrogen compound metabolic process	0.3343	-3.78	2.481	7.221	-6.4776	0.487	0.161	34641	0
GO:0009059	macromolecule biosynthetic process	0.1767	5.076	0.004	6.944	-5.2062	0.556	0.559	9059	0
GO:0043043	peptide biosynthetic process	0.0021	3.1	3.967	5.017	-4.1707	0.528	0	43043	0
GO:0034645	cellular macromolecule biosynthetic process	0.172	2.609	-0.487	6.932	-3.1149	0.5	0.554	34645	0
GO:0055086	nucleobase-containing small molecule metabolic process	0.1084	-2.077	3.674	6.732	-2.9127	0.385	0.352	55086	0
GO:0009126	purine nucleoside monophosphate metabolic process	0.0601	-2.896	0.799	6.476	-2.8257	0.282	0.599	9126	0
GO:0019637	organophosphate metabolic process	0.1197	-2.208	-3.443	6.775	-2.7467	0.445	0.177	19637	0
GO:0006139	nucleobase-containing compound metabolic process	0.2992	-1.189	1.727	7.173	-2.1647	0.405	0.507	6139	0
GO:0046483	heterocycle metabolic process	0.3333	-5.398	-1.26	7.22	-2.0231	0.631	0.26	46483	0
GO:0009116	nucleoside metabolic process	0.0823	null	null	6.612	-2.7467	0.301	0.757	9126	1
GO:0009123	nucleoside monophosphate metabolic process	0.0648	null	null	6.508	-2.7467	0.277	0.751	9126	1
GO:0006163	purine nucleotide metabolic process	0.0764	null	null	6.58	-2.2041	0.255	0.785	9126	1

## Sheet: DMhypergenes_root_BP
REVIGO analysis for GO enrichment from differentially hypermethylated genes in roots: biological process (BP)
term_ID	description	frequency	plot_X	plot_Y	plot_size	log10 p-value	uniqueness	dispensability	representative	eliminated
GO:1901576	organic substance biosynthetic process	0.2889	4.22	0.698	7.157	-8.71	0.546	0.224	1901576	0
GO:0034641	cellular nitrogen compound metabolic process	0.3343	-3.779	-2.482	7.221	-6.4776	0.487	0.161	34641	0
GO:0009059	macromolecule biosynthetic process	0.1767	5.076	-0.002	6.944	-5.2062	0.556	0.559	9059	0
GO:0043043	peptide biosynthetic process	0.0021	3.101	-3.966	5.017	-4.1707	0.528	0	43043	0
GO:0034645	cellular macromolecule biosynthetic process	0.172	2.609	0.488	6.932	-3.1149	0.5	0.554	34645	0
GO:0055086	nucleobase-containing small molecule metabolic process	0.1084	-2.076	-3.675	6.732	-2.9127	0.385	0.352	55086	0
GO:0009126	purine nucleoside monophosphate metabolic process	0.0601	-2.896	-0.8	6.476	-2.8257	0.282	0.599	9126	0
GO:0019637	organophosphate metabolic process	0.1197	-2.209	3.443	6.775	-2.7467	0.445	0.177	19637	0
GO:0006139	nucleobase-containing compound metabolic process	0.2992	-1.188	-1.727	7.173	-2.1647	0.405	0.507	6139	0
GO:0046483	heterocycle metabolic process	0.3333	-5.399	1.259	7.22	-2.0231	0.631	0.26	46483	0
GO:0009116	nucleoside metabolic process	0.0823	null	null	6.612	-2.7467	0.301	0.757	9126	1
GO:0009123	nucleoside monophosphate metabolic process	0.0648	null	null	6.508	-2.7467	0.277	0.751	9126	1
GO:0006163	purine nucleotide metabolic process	0.0764	null	null	6.58	-2.2041	0.255	0.785	9126	1

## Sheet: DMhypergenes_root_CC
REVIGO analysis for GO enrichment from differentially hypermethylated genes in roots: cellular cmpoenents (CC)
term_ID	description	frequency	plot_X	plot_Y	plot_size	log10 p-value	uniqueness	dispensability	representative	eliminated
GO:0009536	plastid	0.01594	2.404	1.047	5.573	-27.0061	0.305	0	9536	0
GO:0044444	cytoplasmic part	0.13606	-2.344	3.232	6.505	-28.8601	0.534	0.194	44444	0
GO:0030529	ribonucleoprotein complex	0.06088	-3.708	-2.442	6.155	-5.2062	0.53	0.195	30529	0
GO:0005737	cytoplasm	0.38159	-3.155	0.999	6.952	-24.8962	0.558	0.316	5737	0
GO:0009534	chloroplast thylakoid	0.00218	4.07	0.537	4.71	-5.2062	0.163	0.431	9534	0
GO:0009507	chloroplast	0.01445	null	null	5.531	-3.2107	0.234	0.786	9534	1
GO:0042651	thylakoid membrane	0.00308	null	null	4.859	-4.9547	0.399	0.919	9534	1
GO:0055035	plastid thylakoid membrane	0.00212	null	null	4.697	-4.451	0.163	0.995	9534	1
GO:0044391	ribosomal subunit	0.01358	1.117	-1.345	5.504	-5.032	0.279	0.509	44391	0
GO:0031984	organelle subcompartment	0.00233	4.1	-1.167	4.738	-4.5031	0.339	0.512	31984	0
GO:0043231	intracellular membrane-bounded organelle	0.08847	1.5	0.258	6.318	-28.8601	0.249	0.666	43231	0

[truncated: 1 more sheets: DMhypogenes_root_CC]
